# Supplementary material
Source: publisher figshare collection journal article supplement (https://gsapubs.figshare.com/ndownloader/files/27692823)
Supplement: Supplementary file 1 [file 27692823]

## Sheet: G48825
Wei, G.-Y., et al., 2021, Revisiting stepwise ocean oxygenation with authigenic barium enrichments in marine mudrocks: Geology, v. 49, https://doi.org/10.1130/G48825.1

## Sheet: Archean-Proterozoic
Age	Section	Al	Ba	Baexcess	References
Ma		%	ppm	ppm
3000	Buhwa Greenstone Belt	9.82059	394	0	Fedo et al., 1996
3000	Buhwa Greenstone Belt	9.92647	877	117.26	Fedo et al., 1996
3000	Buhwa Greenstone Belt	6.02153	15	0	Fedo et al., 1996
3000	Buhwa Greenstone Belt	9.22765	37	0	Fedo et al., 1996
3000	Buhwa Greenstone Belt	11.5994	254	0	Fedo et al., 1996
3000	Buhwa Greenstone Belt	6.04588	615	152.268	Fedo et al., 1996
3000	Buhwa Greenstone Belt	3.61059	9	0	Fedo et al., 1996
3000	Buhwa Greenstone Belt	7.44194	305	0	Fedo et al., 1996
3000	Buhwa Greenstone Belt	7.18941	833	282.745	Fedo et al., 1996
3000	Buhwa Greenstone Belt	5.88706	461	10.4234	Fedo et al., 1996
3000	Buhwa Greenstone Belt	11.6418	588	0	Fedo et al., 1996
3000	Buhwa Greenstone Belt	10.89	580	0	Fedo et al., 1996
3000	Buhwa Greenstone Belt	11.9541	506	0	Fedo et al., 1996
3000	Buhwa Greenstone Belt	10.4876	562	0	Fedo et al., 1996
3000	Buhwa Greenstone Belt	11.9118	534	0	Fedo et al., 1996
3000	Buhwa Greenstone Belt	12.3141	586	0	Fedo et al., 1996
3000	Buhwa Greenstone Belt	10.8635	526	0	Fedo et al., 1996
3000	Buhwa Greenstone Belt	12.0018	538	0	Fedo et al., 1996
3000	Buhwa Greenstone Belt	8.98941	446	0	Fedo et al., 1996
3000	Buhwa Greenstone Belt	14.4212	801	0	Fedo et al., 1996
2710	Carajás iron-ore district	5.12471	386	0	Cabral et al., 2013
2710	Carajás iron-ore district	5.70706	599	162.2	Cabral et al., 2013
2710	Carajás iron-ore district	7.21588	1103	550.719	Cabral et al., 2013
2710	Carajás iron-ore district	7.13647	1057	510.797	Cabral et al., 2013
2710	Carajás iron-ore district	5.90294	991	539.208	Cabral et al., 2013
2710	Carajás iron-ore district	7.23176	1236	682.504	Cabral et al., 2013
2710	Carajás iron-ore district	6.20471	932	457.112	Cabral et al., 2013
2710	Carajás iron-ore district	6.16765	915	442.948	Cabral et al., 2013
2710	Carajás iron-ore district	5.58529	783	355.519	Cabral et al., 2013
2710	Carajás iron-ore district	7.00412	1032	495.927	Cabral et al., 2013
2710	Carajás iron-ore district	4.93412	484	106.358	Cabral et al., 2013
2710	Carajás iron-ore district	6.20471	743	268.112	Cabral et al., 2013
2710	Carajás iron-ore district	6.36353	934	446.956	Cabral et al., 2013
2710	Carajás iron-ore district	7.21588	999	446.719	Cabral et al., 2013
2710	Carajás iron-ore district	7.28471	1090	532.452	Cabral et al., 2013
650	Volta Basin	8.92059	363	0	Amedjoe et al., 2018
650	Volta Basin	8.55	547	0	Amedjoe et al., 2018
650	Volta Basin	8.62941	289	0	Amedjoe et al., 2018
650	Volta Basin	8.55	423	0	Amedjoe et al., 2018
650	Volta Basin	8.84118	279	0	Amedjoe et al., 2018
650	Volta Basin	8.65588	528	0	Amedjoe et al., 2018
650	Volta Basin	4.17176	729	409.706	Amedjoe et al., 2018
650	Volta Basin	6.96176	290	0	Amedjoe et al., 2018
650	Volta Basin	8.60294	373	0	Amedjoe et al., 2018
650	Volta Basin	9.31765	424	0	Amedjoe et al., 2018
650	Volta Basin	9	405	0	Amedjoe et al., 2018
650	Volta Basin	9.23824	368	0	Amedjoe et al., 2018
650	Volta Basin	9.68824	539	0	Amedjoe et al., 2018
650	Volta Basin	9.31765	609	0	Amedjoe et al., 2018
650	Volta Basin	8.25882	476	0	Amedjoe et al., 2018
650	Volta Basin	3.69	693	410.579	Amedjoe et al., 2018
650	Volta Basin	4.44706	631	290.636	Amedjoe et al., 2018
650	Volta Basin	2.39294	588	404.852	Amedjoe et al., 2018
650	Volta Basin	9.26471	450	0	Amedjoe et al., 2018
650	Volta Basin	6.3	458	0	Amedjoe et al., 2018
650	Volta Basin	2.61529	4510	4309.83	Amedjoe et al., 2018
650	Volta Basin	11.1706	285	0	Amedjoe et al., 2018
650	Volta Basin	9.31765	618	0	Amedjoe et al., 2018
650	Volta Basin	10.5618	573	0	Amedjoe et al., 2018
650	Volta Basin	9.39706	580	0	Amedjoe et al., 2018
650	Volta Basin	3.39882	629	368.865	Amedjoe et al., 2018
650	Volta Basin	3.22412	357	110.236	Amedjoe et al., 2018
650	Volta Basin	2.80588	2730	2515.25	Amedjoe et al., 2018
650	Volta Basin	7.27941	777	219.857	Amedjoe et al., 2018
650	Volta Basin	4.54765	417	68.9377	Amedjoe et al., 2018
1025	southeastern Yakutia	10.7471	508	0	Culler et al., 2000
1025	southeastern Yakutia	10.0059	472	0	Culler et al., 2000
1025	southeastern Yakutia	12.3882	352	0	Culler et al., 2000
1025	southeastern Yakutia	11.9647	379	0	Culler et al., 2000
1025	southeastern Yakutia	11.8059	428	0	Culler et al., 2000
1025	southeastern Yakutia	11.2765	350	0	Culler et al., 2000
1025	southeastern Yakutia	11.2765	450	0	Culler et al., 2000
1025	southeastern Yakutia	9.9	242	0	Culler et al., 2000
1025	southeastern Yakutia	10.8	553	0	Culler et al., 2000
1025	southeastern Yakutia	12.3882	233	0	Culler et al., 2000
1025	southeastern Yakutia	9.79412	443	0	Culler et al., 2000
1025	southeastern Yakutia	11.8059	249	0	Culler et al., 2000
1025	southeastern Yakutia	11.0647	492	0	Culler et al., 2000
1025	southeastern Yakutia	12.9176	439	0	Culler et al., 2000
1025	southeastern Yakutia	10.1118	324	0	Culler et al., 2000
1025	southeastern Yakutia	12.5471	352	0	Culler et al., 2000
1025	southeastern Yakutia	14.4529	329	0	Culler et al., 2000
1025	southeastern Yakutia	12.3882	245	0	Culler et al., 2000
1025	southeastern Yakutia	11.8059	324	0	Culler et al., 2000
1025	southeastern Yakutia	13.5529	225	0	Culler et al., 2000
1025	southeastern Yakutia	11.7529	161	0	Culler et al., 2000
1025	southeastern Yakutia	10.9059	144	0	Culler et al., 2000
1025	southeastern Yakutia	13.9235	207	0	Culler et al., 2000
1025	southeastern Yakutia	13.7647	370	0	Culler et al., 2000
2173	Yerrida Basin	0.6	105	59.0779	Pirajno and Grey, 2002
2173	Yerrida Basin	5	46	0	Pirajno and Grey, 2002
2173	Yerrida Basin	0.7	392	338.424	Pirajno and Grey, 2002
2173	Yerrida Basin	2.5	4055	3863.66	Pirajno and Grey, 2002
2173	Yerrida Basin	4.2	97	0	Pirajno and Grey, 2002
1800	Cuddapah basin	4.87588	4557	4183.82	Manikyamba et al., 2008
1800	Cuddapah basin	8.47059	10235	9586.69	Manikyamba et al., 2008
1800	Cuddapah basin	6.27882	3868	3387.44	Manikyamba et al., 2008
1800	Cuddapah basin	8.45471	10028	9380.9	Manikyamba et al., 2008
1800	Cuddapah basin	8.49176	10047	9397.07	Manikyamba et al., 2008
1800	Cuddapah basin	8.64529	10833	10171.3	Manikyamba et al., 2008
1800	Cuddapah basin	8.60824	194	0	Manikyamba et al., 2008
1800	Cuddapah basin	7.72941	251	0	Manikyamba et al., 2008
1800	Cuddapah basin	8.48118	289	0	Manikyamba et al., 2008
1800	Cuddapah basin	8.62941	318	0	Manikyamba et al., 2008
1800	Cuddapah basin	7.50176	397	0	Manikyamba et al., 2008
1800	Cuddapah basin	7.80882	339	0	Manikyamba et al., 2008
1800	Cuddapah basin	7.53882	332	0	Manikyamba et al., 2008
1800	Kaladgi basin	8.49176	315	0	Sambasiva Rao et al., 1999
1800	Kaladgi basin	11.5624	822	0	Sambasiva Rao et al., 1999
1800	Kaladgi basin	11.3135	636	0	Sambasiva Rao et al., 1999
1800	Kaladgi basin	10.5406	724	0	Sambasiva Rao et al., 1999
1800	Kaladgi basin	9.68824	1089	347.494	Sambasiva Rao et al., 1999
1800	Kaladgi basin	10.98	800	0	Sambasiva Rao et al., 1999
1800	Kaladgi basin	10.6941	837	18.5065	Sambasiva Rao et al., 1999
1800	Kaladgi basin	7.21059	670	118.125	Sambasiva Rao et al., 1999
1800	Kaladgi basin	7.14176	624	77.3922	Sambasiva Rao et al., 1999
1800	Kaladgi basin	11.3771	549	0	Sambasiva Rao et al., 1999
1800	Kaladgi basin	10.35	320	0	Sambasiva Rao et al., 1999
1800	Kaladgi basin	8.85706	1045	367.109	Sambasiva Rao et al., 1999
1800	Kaladgi basin	9.07412	335	0	Sambasiva Rao et al., 1999
1800	Kaladgi basin	9.22765	463	0	Sambasiva Rao et al., 1999
1800	Kaladgi basin	8.96294	351	0	Sambasiva Rao et al., 1999
1800	Kaladgi basin	9.51353	312	0	Sambasiva Rao et al., 1999
680	Vindhyan Supergroup	9.42882	438	0	Paikaray et al., 2008
680	Vindhyan Supergroup	9.32294	395	0	Paikaray et al., 2008
680	Vindhyan Supergroup	8.50235	383	0	Paikaray et al., 2008
680	Vindhyan Supergroup	7.65529	365	0	Paikaray et al., 2008
680	Vindhyan Supergroup	8.19529	359	0	Paikaray et al., 2008
680	Vindhyan Supergroup	7.24765	333	0	Paikaray et al., 2008
680	Vindhyan Supergroup	8.41765	362	0	Paikaray et al., 2008
710	Vindhyan Supergroup	10.3924	309	0	Paikaray et al., 2008
710	Vindhyan Supergroup	9.90529	361	0	Paikaray et al., 2008
710	Vindhyan Supergroup	10.2759	428	0	Paikaray et al., 2008
710	Vindhyan Supergroup	10.1647	360	0	Paikaray et al., 2008
710	Vindhyan Supergroup	9.83118	537	0	Paikaray et al., 2008
910	Vindhyan Supergroup	8.68765	460	0	Paikaray et al., 2008
910	Vindhyan Supergroup	8.01	333	0	Paikaray et al., 2008
910	Vindhyan Supergroup	8.93118	245	0	Paikaray et al., 2008
910	Vindhyan Supergroup	8.79882	421	0	Paikaray et al., 2008
910	Vindhyan Supergroup	8.09471	403	0	Paikaray et al., 2008
910	Vindhyan Supergroup	8.08412	300	0	Paikaray et al., 2008
910	Vindhyan Supergroup	8.18471	344	0	Paikaray et al., 2008
910	Vindhyan Supergroup	7.83	311	0	Paikaray et al., 2008
910	Vindhyan Supergroup	5.91353	337	0	Paikaray et al., 2008
910	Vindhyan Supergroup	5.22529	340	0	Paikaray et al., 2008
1600	Vindhyan Supergroup	6.05647	300	0	Paikaray et al., 2008
1600	Vindhyan Supergroup	6.00882	384	0	Paikaray et al., 2008
1600	Vindhyan Supergroup	6.75529	267	0	Paikaray et al., 2008
1600	Vindhyan Supergroup	5.76529	260	0	Paikaray et al., 2008
1600	Vindhyan Supergroup	5.98235	285	0	Paikaray et al., 2008
1600	Vindhyan Supergroup	7.96765	308	0	Paikaray et al., 2008
1600	Vindhyan Supergroup	5.91882	293	0	Paikaray et al., 2008
1600	Vindhyan Supergroup	7.05176	283	0	Paikaray et al., 2008
1600	Vindhyan Supergroup	5.71235	225	0	Paikaray et al., 2008
1600	Vindhyan Supergroup	5.36294	356	0	Paikaray et al., 2008
1600	Vindhyan Supergroup	5.55353	263	0	Paikaray et al., 2008
1600	Vindhyan Supergroup	5.06118	235	0	Paikaray et al., 2008
1600	Vindhyan Supergroup	5.76529	263	0	Paikaray et al., 2008
1600	Vindhyan Supergroup	5.33118	288	0	Paikaray et al., 2008
1600	Vindhyan Supergroup	5.42118	230	0	Paikaray et al., 2008
1630	Vindhyan Supergroup	9.79941	300	0	Paikaray et al., 2008
1630	Vindhyan Supergroup	9.05294	328	0	Paikaray et al., 2008
1630	Vindhyan Supergroup	10.2282	380	0	Paikaray et al., 2008
1630	Vindhyan Supergroup	9.04765	266	0	Paikaray et al., 2008
1630	Vindhyan Supergroup	10.98	492	0	Paikaray et al., 2008
1630	Vindhyan Supergroup	10.9376	315	0	Paikaray et al., 2008
1630	Vindhyan Supergroup	10.3818	288	0	Paikaray et al., 2008
1630	Vindhyan Supergroup	10.4029	245	0	Paikaray et al., 2008
1630	Vindhyan Supergroup	9.58235	421	0	Paikaray et al., 2008
1630	Vindhyan Supergroup	10.1224	297	0	Paikaray et al., 2008
1630	Vindhyan Supergroup	11.1865	331	0	Paikaray et al., 2008
1630	Vindhyan Supergroup	10.5088	371	0	Paikaray et al., 2008
1630	Vindhyan Supergroup	10.4718	389	0	Paikaray et al., 2008
1630	Vindhyan Supergroup	9.31765	380	0	Paikaray et al., 2008
1630	Vindhyan Supergroup	11.0859	464	0	Paikaray et al., 2008
2000	Vindhyan Supergroup	7.82471	314	0	Paikaray et al., 2008
2000	Vindhyan Supergroup	8.93118	356	0	Paikaray et al., 2008
2000	Vindhyan Supergroup	9.13235	326	0	Paikaray et al., 2008
2000	Vindhyan Supergroup	7.51765	277	0	Paikaray et al., 2008
2000	Vindhyan Supergroup	8.54471	286	0	Paikaray et al., 2008
2000	Vindhyan Supergroup	7.36412	251	0	Paikaray et al., 2008
2000	Vindhyan Supergroup	6.67059	496	0	Paikaray et al., 2008
2000	Vindhyan Supergroup	6.46941	502	6.85195	Paikaray et al., 2008
2000	Vindhyan Supergroup	6.27882	497	16.439	Paikaray et al., 2008
2000	Vindhyan Supergroup	8.29588	494	0	Paikaray et al., 2008
2000	Vindhyan Supergroup	5.86588	502	53.0442	Paikaray et al., 2008
2000	Vindhyan Supergroup	6.25765	493	14.0597	Paikaray et al., 2008
2000	Vindhyan Supergroup	7.09412	484	0	Paikaray et al., 2008
2000	Vindhyan Supergroup	11.2288	441	0	Paikaray et al., 2008
2000	Vindhyan Supergroup	11.3082	360	0	Paikaray et al., 2008
2000	Vindhyan Supergroup	10.8953	414	0	Paikaray et al., 2008
2000	Vindhyan Supergroup	10.6941	326	0	Paikaray et al., 2008
2000	Vindhyan Supergroup	9.42882	317	0	Paikaray et al., 2008
1630	Vindhyan Supergroup	5.4	397	0	Mishra and Sen, 2017
1630	Vindhyan Supergroup	5.45294	402	0	Mishra and Sen, 2017
1630	Vindhyan Supergroup	10.2706	376	0	Mishra and Sen, 2017
1630	Vindhyan Supergroup	9.05294	437	0	Mishra and Sen, 2017
1630	Vindhyan Supergroup	8.36471	257	0	Mishra and Sen, 2017
1630	Vindhyan Supergroup	12.3882	1754	805.844	Mishra and Sen, 2017
1630	Vindhyan Supergroup	5.66471	1619	1185.44	Mishra and Sen, 2017
1630	Vindhyan Supergroup	4.92353	400	23.1688	Mishra and Sen, 2017
1630	Vindhyan Supergroup	7.88824	347	0	Mishra and Sen, 2017
1630	Vindhyan Supergroup	4.65882	228	0	Mishra and Sen, 2017
1630	Vindhyan Supergroup	5.4	251	0	Mishra and Sen, 2017
1630	Vindhyan Supergroup	5.77059	206	0	Mishra and Sen, 2017
1630	Vindhyan Supergroup	9.84706	646	0	Mishra and Sen, 2017
1630	Vindhyan Supergroup	8.1	699	79.0519	Mishra and Sen, 2017
1630	Vindhyan Supergroup	9.63529	619	0	Mishra and Sen, 2017
1630	Vindhyan Supergroup	6.82941	718	195.299	Mishra and Sen, 2017
1630	Vindhyan Supergroup	4.87059	175	0	Mishra and Sen, 2017
1630	Vindhyan Supergroup	5.4	330	0	Mishra and Sen, 2017
1630	Vindhyan Supergroup	5.08235	438	49.013	Mishra and Sen, 2017
3460	Pilbara	11.1071	1030.3	180.201	Wille et al., 2013
3460	Pilbara	13.3465	1051.3	29.8039	Wille et al., 2013
3460	Pilbara	13.3888	1522.5	497.762	Wille et al., 2013
3460	Pilbara	11.8853	2886	1976.34	Wille et al., 2013
3460	Pilbara	9.88941	264	0	Wille et al., 2013
2940	Pilbara	9.39706	450	0	Wille et al., 2013
2940	Pilbara	8.39118	428.3	0	Wille et al., 2013
2940	Pilbara	10.3182	380.2	0	Wille et al., 2013
2940	Pilbara	10.2388	681.5	0	Wille et al., 2013
2940	Pilbara	10.1912	659.6	0	Wille et al., 2013
2770	Pilbara	12.1235	1284.3	356.404	Wille et al., 2013
2770	Pilbara	11.3506	1079.5	210.762	Wille et al., 2013
2770	Pilbara	16.6976	1613.2	335.216	Wille et al., 2013
2770	Pilbara	11.8694	4983.9	4075.45	Wille et al., 2013
2770	Pilbara	17.0576	1573.7	268.162	Wille et al., 2013
2760	Pilbara	11.9065	771.1	0	Wille et al., 2013
2760	Pilbara	11.8906	846.7	0	Wille et al., 2013
2760	Pilbara	11.6576	693.2	0	Wille et al., 2013
2760	Pilbara	12.3618	835.1	0	Wille et al., 2013
2800	Singhbhum mobile belt	16.04	394	0	Mir, 2015
2800	Singhbhum mobile belt	17.1	528	0	Mir, 2015
2800	Singhbhum mobile belt	21.74	389	0	Mir, 2015
2800	Singhbhum mobile belt	6.89	407	0	Mir, 2015
2800	Singhbhum mobile belt	10.22	391	0	Mir, 2015
2800	Singhbhum mobile belt	4.3	398	142.457	Mir, 2015
2800	Singhbhum mobile belt	24.63	536	0	Mir, 2015
2800	Singhbhum mobile belt	1.2	436	364.686	Mir, 2015
2800	Singhbhum mobile belt	1.53	292	201.074	Mir, 2015
1380	Xiamaling Fm., North China	5.71765	568.23	130.62	Liu et al., 2018
1380	Xiamaling Fm., North China	5.60647	504.25	75.1487	Liu et al., 2018
1380	Xiamaling Fm., North China	5.96647	312.3	0	Liu et al., 2018
1380	Xiamaling Fm., North China	5.98235	319.4	0	Liu et al., 2018
1380	Xiamaling Fm., North China	4.50529	318.7	0	Liu et al., 2018
1380	Xiamaling Fm., North China	10.0271	390.2	0	Liu et al., 2018
1380	Xiamaling Fm., North China	9.94235	428.17	0	Liu et al., 2018
1380	Xiamaling Fm., North China	5.71235	677.04	239.835	Liu et al., 2018
1380	Xiamaling Fm., North China	4.77529	421.94	56.4543	Liu et al., 2018
1380	Xiamaling Fm., North China	3.74294	276.6	0	Liu et al., 2018
1380	Xiamaling Fm., North China	6.80294	438.31	0	Liu et al., 2018
1380	Xiamaling Fm., North China	7.71882	573.53	0	Liu et al., 2018
1380	Xiamaling Fm., North China	4.67471	395.3	37.513	Liu et al., 2018
1380	Xiamaling Fm., North China	4.95529	505.56	126.298	Chen et al., 2015
1380	Xiamaling Fm., North China	5.58529	1193.5	766.019	Chen et al., 2015
1380	Xiamaling Fm., North China	5.01353	442.97	59.2505	Chen et al., 2015
1380	Xiamaling Fm., North China	9.30176	492.8	0	Chen et al., 2015
1380	Xiamaling Fm., North China	0.635294	47.41	0	Chen et al., 2015
1640	Cuizhuang Fm., Ordos Basin	4.71706	618.5	257.341	Pan et al., 2020
1640	Cuizhuang Fm., Ordos Basin	4.75941	677.94	313.538	Pan et al., 2020
1640	Cuizhuang Fm., Ordos Basin	9.32824	429.29	0	Pan et al., 2020
1640	Cuizhuang Fm., Ordos Basin	9.98471	473.87	0	Pan et al., 2020
1640	Cuizhuang Fm., Ordos Basin	8.93118	501.85	0	Pan et al., 2020
1640	Cuizhuang Fm., Ordos Basin	10.4612	558.62	0	Pan et al., 2020
1640	Cuizhuang Fm., Ordos Basin	9.79941	482.63	0	Pan et al., 2020
1640	Cuizhuang Fm., Ordos Basin	9.92118	307.8	0	Pan et al., 2020
1640	Cuizhuang Fm., Ordos Basin	9.32294	422.1	0	Pan et al., 2020
1640	Cuizhuang Fm., Ordos Basin	9.56118	467.96	0	Pan et al., 2020
1640	Cuizhuang Fm., Ordos Basin	9.17471	471.4	0	Pan et al., 2020
1640	Cuizhuang Fm., Ordos Basin	10.3818	574.98	0	Pan et al., 2020
1640	Cuizhuang Fm., Ordos Basin	9.05824	184.22	0	Pan et al., 2020
1640	Cuizhuang Fm., Ordos Basin	8.53941	340.98	0	Pan et al., 2020
1640	Cuizhuang Fm., Ordos Basin	8.79882	220.67	0	Pan et al., 2020
1640	Cuizhuang Fm., Ordos Basin	10.0853	258.25	0	Pan et al., 2020
1640	Cuizhuang Fm., Ordos Basin	9.77824	170.7	0	Pan et al., 2020
1640	Cuizhuang Fm., Ordos Basin	9.58765	296.06	0	Pan et al., 2020
1640	Cuizhuang Fm., Ordos Basin	10.4876	314.55	0	Pan et al., 2020
1640	Cuizhuang Fm., Ordos Basin	9.85765	386.25	0	Pan et al., 2020
1640	Cuizhuang Fm., Ordos Basin	10.2388	338.17	0	Pan et al., 2020
1640	Cuizhuang Fm., Ordos Basin	9.39176	276.26	0	Pan et al., 2020
1640	Cuizhuang Fm., Ordos Basin	8.61882	287.31	0	Pan et al., 2020
1437	Hongshuizhuang Fm., North China	3.18		246.97	Ma et al., 2017
1437	Hongshuizhuang Fm., North China	4.11		377.96	Ma et al., 2017
1437	Hongshuizhuang Fm., North China	2.77		239.97	Ma et al., 2017
1437	Hongshuizhuang Fm., North China	5.8		401.94	Ma et al., 2017
1437	Hongshuizhuang Fm., North China	6.87		535.93	Ma et al., 2017
1437	Hongshuizhuang Fm., North China	5.95		402.94	Ma et al., 2017
1437	Hongshuizhuang Fm., North China	5.29		315.95	Ma et al., 2017
1437	Hongshuizhuang Fm., North China	4.57		387.95	Ma et al., 2017
1437	Hongshuizhuang Fm., North China	5.13		387.95	Ma et al., 2017
1437	Hongshuizhuang Fm., North China	5.82		470.94	Ma et al., 2017
1437	Hongshuizhuang Fm., North China	6.07		453.94	Ma et al., 2017
1437	Hongshuizhuang Fm., North China	7.13		477.93	Ma et al., 2017
1437	Hongshuizhuang Fm., North China	7.37		500.93	Ma et al., 2017
1437	Hongshuizhuang Fm., North China	7.71		484.92	Ma et al., 2017
1437	Hongshuizhuang Fm., North China	7.04		504.93	Ma et al., 2017
1437	Hongshuizhuang Fm., North China	7.39		514.93	Ma et al., 2017
1437	Hongshuizhuang Fm., North China	6.94		507.93	Ma et al., 2017
1437	Hongshuizhuang Fm., North China	7.37		495.93	Ma et al., 2017
1437	Hongshuizhuang Fm., North China	6.35		468.94	Ma et al., 2017
1437	Hongshuizhuang Fm., North China	7.05		593.93	Ma et al., 2017
1437	Hongshuizhuang Fm., North China	7.59		528.92	Ma et al., 2017
1437	Hongshuizhuang Fm., North China	6.29		388.94	Ma et al., 2017
1437	Hongshuizhuang Fm., North China	7.33		471.93	Ma et al., 2017
1437	Hongshuizhuang Fm., North China	7.15		430.93	Ma et al., 2017
1437	Hongshuizhuang Fm., North China	7.64		515.92	Ma et al., 2017
1437	Hongshuizhuang Fm., North China	7.68		487.92	Ma et al., 2017
1437	Hongshuizhuang Fm., North China	5.01		288.95	Ma et al., 2017
1437	Hongshuizhuang Fm., North China	6.27		396.94	Ma et al., 2017
1437	Hongshuizhuang Fm., North China	5.11		278.95	Ma et al., 2017
845	Baishugou Fm., North China	11.5412	1769	885.357	Hu et al., 2020
845	Baishugou Fm., North China	10.2706	1873	1086.64	Hu et al., 2020
845	Baishugou Fm., North China	10.5353	1119	312.371	Hu et al., 2020
845	Baishugou Fm., North China	4.34647	324	0	Hu et al., 2020
845	Baishugou Fm., North China	1.87941	142	0	Hu et al., 2020
845	Baishugou Fm., North China	4.43118	201	0	Hu et al., 2020
845	Baishugou Fm., North China	4.69588	336	0	Hu et al., 2020
845	Baishugou Fm., North China	6.67059	479	0	Hu et al., 2020
845	Baishugou Fm., North China	4.33059	195	0	Hu et al., 2020
845	Baishugou Fm., North China	1.59353	78.2	0	Hu et al., 2020
845	Baishugou Fm., North China	4.11882	219	0	Hu et al., 2020
845	Baishugou Fm., North China	2.15471	147	0	Hu et al., 2020
845	Baishugou Fm., North China	5.92941	441	0	Hu et al., 2020
845	Baishugou Fm., North China	3.87529	290	0	Hu et al., 2020
845	Baishugou Fm., North China	3.72706	185	0	Hu et al., 2020
845	Baishugou Fm., North China	3.23471	195	0	Hu et al., 2020
845	Baishugou Fm., North China	6.88235	467	0	Hu et al., 2020
845	Baishugou Fm., North China	4.87588	389	15.6809	Hu et al., 2020
845	Baishugou Fm., North China	3.71118	689	404.856	Hu et al., 2020
845	Baishugou Fm., North China	5.4	836	422.552	Hu et al., 2020
1200	Arctic Bay Fm., Borden Basin	3.24	84.34	0	Turner and Kamber, 2012
1200	Arctic Bay Fm., Borden Basin	4.81765	352	0	Turner and Kamber, 2012
1200	Arctic Bay Fm., Borden Basin	5.41588	369.7	0	Turner and Kamber, 2012
1200	Arctic Bay Fm., Borden Basin	10.4718	483.8	0	Turner and Kamber, 2012
1200	Arctic Bay Fm., Borden Basin	0	475.4	475.4	Turner and Kamber, 2012
1200	Arctic Bay Fm., Borden Basin	8.59235	365.8	0	Turner and Kamber, 2012
1200	Arctic Bay Fm., Borden Basin	8.00471	320.2	0	Turner and Kamber, 2012
1200	Arctic Bay Fm., Borden Basin	8.25353	325.5	0	Turner and Kamber, 2012
1200	Arctic Bay Fm., Borden Basin	6.99353	281.8	0	Turner and Kamber, 2012
1200	Arctic Bay Fm., Borden Basin	1.02706	127.3	48.6638	Turner and Kamber, 2012
1200	Arctic Bay Fm., Borden Basin	5.97706	970.1	512.47	Turner and Kamber, 2012
1200	Arctic Bay Fm., Borden Basin	4.43118	183.1	0	Turner and Kamber, 2012
1200	Arctic Bay Fm., Borden Basin	5.91353	166.3	0	Turner and Kamber, 2012
1200	Arctic Bay Fm., Borden Basin	5.25706	142.5	0	Turner and Kamber, 2012
1200	Arctic Bay Fm., Borden Basin	2.70529	50.21	0	Turner and Kamber, 2012
1200	Arctic Bay Fm., Borden Basin	5.60647	156.8	0	Turner and Kamber, 2012
1200	Arctic Bay Fm., Borden Basin	7.36941	154.6	0	Turner and Kamber, 2012
1200	Arctic Bay Fm., Borden Basin	9.16412	194.2	0	Turner and Kamber, 2012
1200	Arctic Bay Fm., Borden Basin	7.63412	192.6	0	Turner and Kamber, 2012
1200	Arctic Bay Fm., Borden Basin	0.873529	28.89	0	Turner and Kamber, 2012
1200	Arctic Bay Fm., Borden Basin	9.47647	191.5	0	Turner and Kamber, 2012
1200	Arctic Bay Fm., Borden Basin	0	203.7	203.7	Turner and Kamber, 2012
1200	Arctic Bay Fm., Borden Basin	8.15294	278.7	0	Turner and Kamber, 2012
1750	Jhamarkotra Fm., India	2.77941	241	28.196	Tripathy et al., 2013
1750	Jhamarkotra Fm., India	2.80059	306	91.5746	Tripathy et al., 2013
1750	Jhamarkotra Fm., India	3.61588	447	170.152	Tripathy et al., 2013
1750	Jhamarkotra Fm., India	3.74294	456	169.424	Tripathy et al., 2013
1750	Jhamarkotra Fm., India	3.66882	395	114.099	Tripathy et al., 2013
1750	Jhamarkotra Fm., India	3.94941	436	133.616	Tripathy et al., 2013
1750	Jhamarkotra Fm., India	3.92824	426	125.237	Tripathy et al., 2013
1750	Jhamarkotra Fm., India	3.88588	32	0	Tripathy et al., 2013
1750	Jhamarkotra Fm., India	1.63059	105	0	Tripathy et al., 2013
1750	Jhamarkotra Fm., India	1.64118	47	0	Tripathy et al., 2013
1750	Jhamarkotra Fm., India	3.14471	55	0	Tripathy et al., 2013
1750	Jhamarkotra Fm., India	2.35059	213	33.0286	Tripathy et al., 2013
1750	Jhamarkotra Fm., India	1.65176	234	107.534	Tripathy et al., 2013
1750	Jhamarkotra Fm., India	1.45588	295	183.531	Tripathy et al., 2013
1750	Jhamarkotra Fm., India	1.70471	199	68.4802	Tripathy et al., 2013
1750	Jhamarkotra Fm., India	1.53	145	27.8564	Tripathy et al., 2013
1750	Jhamarkotra Fm., India	1.60412	208	85.1817	Tripathy et al., 2013
1750	Jhamarkotra Fm., India	2.59412	188	0	Tripathy et al., 2013
Wronkiewicz, D. J. , & Condie, K. C. . (1987). Geochemistry of archean shales from the witwatersrand supergroup, south africa: source-area weathering and provenance. Geochimica Et Cosmochimica Acta, 51(9), 2401-2416.
Cabral, A. R. , Creaser, R. A. , N?Gler, T. , Lehmann, B. , Voegelin, A. R. , & Belyatsky, B. , et al. (2013). Trace-element and multi-isotope geochemistry of late-archean black shales in the carajás iron-ore district, brazil. Chemical Geology, 362, 91-104.
Amedjoe, C. G. , Gawu, S. K. Y. , Ali, B. , Aseidu, D. K. , & Nude, P. M. . (2018). Geochemical compositions of neoproterozoic to lower palaeozoic shales and siltstones in the volta basin (ghana): constraints on provenance and tectonic setting. Sedimentary Geology, 368, 114-131.
Cullers, R. L. , & Podkovyrov, V. N. . (2000). Geochemistry of the mesoproterozoic lakhanda shales in southeastern yakutia, russia: implications for mineralogical and provenance control, and recycling. Precambrian Research, 104(1), 77-93.
Pirajno, F. , & Grey, K. . (2002). Chert in the palaeoproterozoic bartle member, killara formation, yerrida basin, western australia: a rift-related playa lake and thermal spring environment? precambr res 113(3-4):169-192. Precambrian Research, 116( 3–4), 355-355.
Manikyamba, C. , Kerrich, R. , Ignacio González-álvarez, Mathur, R. , & Khanna, T. C. . (2008). Geochemistry of paleoproterozoic black shales from the intracontinental cuddapah basin, india: implications for provenance, tectonic setting, and weathering intensity. Precambrian Research, 162(3-4), 424-440.
Sambasiva Rao, V. V., Sreenivas, B. , Balaram, V. , Govil, P. K. , & Srinivasan, R. . (1999). The nature of the archean upper crust as revealed by the geochemistry of the proterozoic shales of the kaladgi basin, karnataka, southern india. Precambrian Research, 98(1-2), 53-65.
Paikaray, S. , Banerjee, S. , & Mukherji, S. . (2008). Geochemistry of shales from the paleoproterozoic to neoproterozoic vindhyan supergroup: implications on provenance, tectonics and paleoweathering. Journal of Asian earth sciences, 32(1), p.34-48.
Mishra, M. , Sen, S. , & Patranabis-Deb, S. . (2017). Petrological study of the early mesoproterozoic glauconitic sandstone and olive shale members from the semri group, vindhyan supergroup in central india: implications to input from intrabasinal felsic volcanic source and glauconitization. Geological Journal.
Wille, M. , Nebel, O. , Kranendonk, M. J. V. , Schoenberg, R. , & Ellwood, M. J. . (2013). Mo–cr isotope evidence for a reducing archean atmosphere in 3.46–2.76 ga black shales from the pilbara, western australia. Chemical Geology, 340, 67-78.
Mir, A. R. , Sciences, D. O. E. , & Kashmir, U. O. . (2015). Rare earth element geochemistry of post-to neo-archean shales from singhbhum mobile belt, eastern india: implications for tectonic setting and paleo-oxidation conditions. Chinese Journal of Geochemistry.
Liu, Q., Liu, Y., Feng, H., Sun, X., Meng, M., & Cao, L. .(2018). Geochemical characteristics of Mesoproterozoic Xiamaling Formation shales in Beijing and their geological significance. Acta Petrologica et Mineralogica, 37(2): 230-240. (in Chinese with English abstract)
Chen, C., Wei, W., Xiu, D., Zhang, Y., Liu, Z., Dai, Y., Zhu, Y., & Chen, H. .(2015). Geochemical features of the black rock series in Xiamaling Formation, eastern Yanshan area, North China: constraints on its sedimentation. Acta Petrologica et Mineralogica, 34(5): 685-696. (in Chinese with English abstract)
Pan, X., Wang, Z., Li, Q., Gao, J., Zhu, L. & Liu, W. . (2020). Sedimentary environments and mechanism of organic matter enrichment of dark shales with low toc in the mesoproterozoic cuizhuang formation of the ordos basin: evidence from petrology, organic geochemistry, and major and trace elements. Marine and Petroleum Geology, 122.
Ma, K. , Hu, S. , Wang, T. , Zhang, B. , Qin, S. , & Shi, S. , et al. (2017). Sedimentary environments and mechanisms of organic matter enrichment in the mesoproterozoic hongshuizhuang formation of northern china. Palaeogeography Palaeoclimatology Palaeoecology, 475, 176-187.
Hu, S. , Wang, K. , Wang, T. , Yang, T. , Luo, P. , & Shi, S. , et al. (2020). Sedimentary environment and organic matter accumulation of neoproterozoic black shale in the north china craton: a case study of the tonian baishugou formation in the luonan area. Palaeogeography, Palaeoclimatology, Palaeoecology, 547.
Turner, E. C. , & Kamber, B. S. . (2012). Arctic bay formation, borden basin, nunavut (canada): basin evolution, black shale, and dissolved metal systematics in the mesoproterozoic ocean. Precambrian Research, 208-211(none), 1-18.
Tripathy, G. R., Singh, S. K. and Bhu, H., 2013. ReOs isotopes and major and trace element geochemistry of carbonaceous shales, Aravalli Supergroup, India: Impact of post-depositional processes. Chemical Geology 354, 93-106.

## Sheet: Neoproterozoic-cambrian
Time bin	Section	Formation	TOC	Al	Th	Ba	Baexcess	Reference
Ma			%	%	ppm	ppm	ppm
520	Daotuo, South China	Bianmachong	0.31	10.0853		669	0	Zhai et al., 2017
520	Daotuo	Bianmachong	0.41	9.98471		687	0	Zhai et al., 2017
520	Daotuo	Bianmachong	0.63	9.93176		677	0	Zhai et al., 2017
520	Daotuo	Bianmachong	0.72	9.99529		705	0	Zhai et al., 2017
520	Daotuo	Bianmachong	0.71	9.40235		670	0	Zhai et al., 2017
520	Daotuo	Bianmachong	0.85	9.12706		668	0	Zhai et al., 2017
520	Daotuo	Bianmachong	1.12	8.59765		600	0	Zhai et al., 2017
520	Daotuo	Bianmachong	0.7	9.03176		671	0	Zhai et al., 2017
520	Daotuo	Bianmachong	0.63	10.3712		761	0	Zhai et al., 2017
520	Daotuo	Bianmachong	0.56	10.5512		738	0	Zhai et al., 2017
520	Daotuo	Bianmachong	0.35	9.82059		773	21.3636	Zhai et al., 2017
520	Daotuo	Bianmachong	1.42	9.24353		756	48.5299	Zhai et al., 2017
520	Daotuo	Bianmachong	1.47	9.39706		793	73.7792	Zhai et al., 2017
520	Daotuo	Bianmachong	1.35	8.92059		757	74.2468	Zhai et al., 2017
520	Daotuo	Bianmachong	0.96	7.87235		578	0	Zhai et al., 2017
520	Daotuo	Bianmachong	1.04	9.88412		859	102.501	Zhai et al., 2017
520	Daotuo	Bianmachong	0.94	9.51353		908	179.865	Zhai et al., 2017
520	Daotuo	Bianmachong	1.42	9.57176		888	155.408	Zhai et al., 2017
520	Daotuo	Bianmachong	1.03	9.43412		841	118.943	Zhai et al., 2017
520	Daotuo	Bianmachong	0.63	11.2024		1040	182.608	Zhai et al., 2017
520	Daotuo	Bianmachong	1.06	11.0171		1050	206.79	Zhai et al., 2017
520	Daotuo	Bianmachong	0.6	11.8112		1160	256.01	Zhai et al., 2017
520	Daotuo	Bianmachong	0.81	10.4453		1060	260.551	Zhai et al., 2017
520	Daotuo	Bianmachong	0.72	11.6206		1120	230.597	Zhai et al., 2017
520	Daotuo	Bianmachong	1.16	10.3394		1570	778.655	Zhai et al., 2017
520	Daotuo	Bianmachong	1.82	9.58765		1470	736.192	Zhai et al., 2017
520	Daotuo	Bianmachong	1.26	10.7153		1800	979.886	Zhai et al., 2017
520	Daotuo	Bianmachong	0.92	9.77294		1520	772.01	Zhai et al., 2017
520	Daotuo	Jiumenchong Fm.	3.53	7.58118		2910	2329.76	Zhai et al., 2017
520	Daotuo	Jiumenchong Fm.	0.5	11.0012		4890	4048.01	Zhai et al., 2017
520	Daotuo	Jiumenchong Fm.	0.35	10.8318		5640	4810.97	Zhai et al., 2017
520	Daotuo	Jiumenchong Fm.	0.51	8.85706		4260	3582.11	Zhai et al., 2017
520	Daotuo	Jiumenchong Fm.	5.45	8.98941		3770	3081.98	Zhai et al., 2017
520	Daotuo	Jiumenchong Fm.	4.05	7.75588		5020	4426.39	Zhai et al., 2017
520	Daotuo	Jiumenchong Fm.	4.11	7.97824		5710	5099.37	Zhai et al., 2017
520	Daotuo	Jiumenchong Fm.	7.16	6.09882		5850	5383.22	Zhai et al., 2017
520	Daotuo	Jiumenchong Fm.	7.93	4.69588		7570	7210.59	Zhai et al., 2017
520	Daotuo	Jiumenchong Fm.	8.15	6.32118		12500	12016.2	Zhai et al., 2017
520	Daotuo	Jiumenchong Fm.	10.76	6.86647		8820	8294.46	Zhai et al., 2017
520	Daotuo	Jiumenchong Fm.				10700	10700	Zhai et al., 2017
520	Daotuo	Jiumenchong Fm.		5.85		8570	8122.26	Zhai et al., 2017
520	Daotuo	Jiumenchong Fm.	8.76	4.09235		4910	4596.78	Zhai et al., 2017
520	Daotuo	Jiumenchong Fm.	2.43			2390	2390	Zhai et al., 2017
555	Daotuo	Doushantuo	8.76	5.59059		1120	692.114	Zhai et al., 2017
555	Daotuo	Doushantuo	10.43	5.43706		1940	1523.86	Zhai et al., 2017
555	Daotuo	Doushantuo	9.5	8.78824		4650	3977.38	Zhai et al., 2017
555	Daotuo	Doushantuo	0.46	8.02588		2240	1625.72	Zhai et al., 2017
555	Daotuo	Doushantuo	2.79	8.29588		2290	1655.06	Zhai et al., 2017
555	Daotuo	Doushantuo	1.37	7.80882		2420	1822.34	Zhai et al., 2017
555	Daotuo	Doushantuo	2.27	9.41824		2640	1919.16	Zhai et al., 2017
520	Songtao, South China	Jiumenchong Fm.	3.52		11.18	22923.7	22259.3	Guo et al., 2007
520	Songtao	Jiumenchong Fm.	3.08		10.28	11720.3	11109.4	Guo et al., 2007
520	Songtao	Jiumenchong Fm.	2.28		9.8	15857.4	15275	Guo et al., 2007
520	Songtao	Jiumenchong Fm.	1.83		8.8	14136	13613.1	Guo et al., 2007
520	Songtao	Jiumenchong Fm.			2.82	3912.43	3744.84	Guo et al., 2007
520	Songtao	Jiumenchong Fm.	4.5		8	11363.2	10887.8	Guo et al., 2007
520	Songtao	Jiumenchong Fm.			8.49	9023.31	8518.76	Guo et al., 2007
520	Songtao	Jiumenchong Fm.	8.53		7.69	5964.8	5507.79	Guo et al., 2007
520	Songtao	Jiumenchong Fm.	10.11		0.57	4403.85	4369.98	Guo et al., 2007
520	Songtao	Jiumenchong Fm.	13.78		6.97	8868.35	8454.13	Guo et al., 2007
520	Songtao	Jiumenchong Fm.	10.28		8.61	7619.33	7107.65	Guo et al., 2007
520	Songtao	Jiumenchong Fm.	13.53		8.59	7946.08	7435.59	Guo et al., 2007
520	Songtao	Jiumenchong Fm.	10		0.29	1838.13	1820.9	Guo et al., 2007
520	Songtao	Jiumenchong Fm.	6.83		7.35	7625.78	7188.98	Guo et al., 2007
535	Songtao	Liuchapo Fm.	1.14		31.1	1585.79	0	Guo et al., 2007
535	Songtao	Liuchapo Fm.	2.24		0.22	377.11	364.036	Guo et al., 2007
535	Songtao	Liuchapo Fm.	2.91		0.41	735.51	711.144	Guo et al., 2007
535	Songtao	Liuchapo Fm.	0.86		0.24	240.13	225.867	Guo et al., 2007
535	Songtao	Liuchapo Fm.	0.81		0.59	187.21	152.147	Guo et al., 2007
535	Songtao	Liuchapo Fm.	13.21		1.14	1120.54	1052.79	Guo et al., 2007
535	Songtao	Liuchapo Fm.	11.64		0.35	60.07	39.27	Guo et al., 2007
535	Songtao	Liuchapo Fm.	3.83		5.66	615.37	279.004	Guo et al., 2007
555	Songtao	Doushantuo	10.43		4.22	522.85	272.061	Guo et al., 2007
555	Songtao	Doushantuo			7.12	756.17	333.039	Guo et al., 2007
555	Songtao	Doushantuo	13.06		3.59	296.26	82.9114	Guo et al., 2007
555	Songtao	Doushantuo			14.57	1309.53	443.656	Guo et al., 2007
555	Songtao	Doushantuo	2.71		1.53	140.89	49.9643	Guo et al., 2007
555	Songtao	Doushantuo			4.16	423	175.777	Guo et al., 2007
555	Songtao	Doushantuo	4.54		1.63	235.92	139.051	Guo et al., 2007
555	Songtao	Doushantuo			1.55	155.25	63.1357	Guo et al., 2007
555	Songtao	Doushantuo			12.19	994.11	269.676	Guo et al., 2007
555	Songtao	Doushantuo			1.49	155.12	66.5714	Guo et al., 2007
520	Shatan, South China	Guojiaba	0.2		7.69	532.67	75.6643	Guo et al., 2007
520	Shatan	Guojiaba			10.2	1077.95	471.779	Guo et al., 2007
520	Shatan	Guojiaba	0.6		10.33	1194.87	580.973	Guo et al., 2007
520	Shatan	Guojiaba	0.4		9.89	1063.12	475.371	Guo et al., 2007
520	Shatan	Guojiaba			10.8	1208.01	566.181	Guo et al., 2007
520	Shatan	Guojiaba			10.97	1007.16	355.229	Guo et al., 2007
520	Shatan	Guojiaba	0.6		10.61	1358.89	728.353	Guo et al., 2007
520	Shatan	Guojiaba	0.7		11.43	1399.53	720.261	Guo et al., 2007
520	Shatan	Guojiaba	0.8		9.14	997.22	454.043	Guo et al., 2007
520	Shatan	Guojiaba	0.6		11.89	1314.47	607.864	Guo et al., 2007
520	Shatan	Guojiaba	0.9		11.95	1632.46	922.289	Guo et al., 2007
520	Shatan	Guojiaba	0.8		10.92	925.22	276.26	Guo et al., 2007
520	Shatan	Guojiaba	1.1		11.42	979.62	300.946	Guo et al., 2007
520	Shatan	Guojiaba	1.3		11.08	848.45	189.981	Guo et al., 2007
520	Shatan	Guojiaba	1.6		11.36	818.01	142.901	Guo et al., 2007
520	Shatan	Guojiaba	1.7		11.55	979.33	292.93	Guo et al., 2007
520	Shatan	Guojiaba	1.9		13.76	1209.37	391.633	Guo et al., 2007
520	Shatan	Guojiaba			3.54	1033.62	823.243	Guo et al., 2007
520	Shatan	Guojiaba	3.2		11.5	993.12	309.691	Guo et al., 2007
520	Shatan	Guojiaba	4.1		11.32	862.16	189.429	Guo et al., 2007
520	Shatan	Guojiaba	3.1		9.63	875.27	302.973	Guo et al., 2007
520	Shatan	Guojiaba	3.4		9.65	905.42	331.934	Guo et al., 2007
520	Shatan	Guojiaba	3.7		9.79	1005.75	423.944	Guo et al., 2007
520	Shatan	Guojiaba	4.9		10.12	930.5	329.083	Guo et al., 2007
520	Shatan	Guojiaba	4.2		10.42	965.18	345.934	Guo et al., 2007
520	Shatan	Guojiaba	3.1		11.84	1028.03	324.396	Guo et al., 2007
520	Shatan	Guojiaba	2.6		11.01	1183.2	528.891	Guo et al., 2007
520	Shatan	Guojiaba	0.9		11.49	1140.71	457.876	Guo et al., 2007
520	Shatan	Guojiaba			11.77	1072.19	372.716	Guo et al., 2007
520	Shatan	Guojiaba			12.26	1516.9	788.306	Guo et al., 2007
520	Shatan	Guojiaba			12.45	116.51	0	Guo et al., 2007
520	Longbizui	Niutitang	1.78	0.08		90840	90833.9	Guo et al., 2016
520	Longbizui	Niutitang	1.67	0.1		105600	105592	Guo et al., 2016
520	Longbizui	Niutitang	2.48	0.34		758.2	732.177	Guo et al., 2016
520	Longbizui	Niutitang	8.99	3.73		20230	19944.5	Guo et al., 2016
520	Longbizui	Niutitang	9.13	4.32		22570	22239.4	Guo et al., 2016
520	Longbizui	Niutitang	8.1	5.03		3895	3510.02	Guo et al., 2016
520	Longbizui	Niutitang	3.35	0.16		1319	1306.75	Guo et al., 2016
520	Longbizui	Niutitang	4.58	0.51		3564	3524.97	Guo et al., 2016
520	Longbizui	Niutitang	7.77	5.06		12060	11672.7	Guo et al., 2016
520	Longbizui	Niutitang	8.41	1.14		4004	3916.75	Guo et al., 2016
520	Longbizui	Niutitang	9.4	4.92		11710	11333.4	Guo et al., 2016
520	Longbizui	Niutitang	8.11	4.62		15400	15046.4	Guo et al., 2016
520	Longbizui	Niutitang	8.06	4.84		14420	14049.6	Guo et al., 2016
520	Longbizui	Niutitang	7.89	4.41		13120	12782.5	Guo et al., 2016
520	Longbizui	Niutitang	7.02	5.8		11640	11196.1	Guo et al., 2016
520	Longbizui	Niutitang	7.74	2.23		21780	21609.3	Guo et al., 2016
520	Longbizui	Niutitang	8.23	2.91		15640	15417.3	Guo et al., 2016
520	Longbizui	Niutitang	5.38	4.54		12460	12112.5	Guo et al., 2016
520	Longbizui	Niutitang	5.16	4.64		11940	11584.9	Guo et al., 2016
520	Longbizui	Niutitang	5.71	4.18		19330	19010.1	Guo et al., 2016
535	Lijiatuo, South China	Xiaoyanxi	3.42	0.13		613.1	603.15	Guo et al., 2016
535	Lijiatuo	Xiaoyanxi	1.91	0.13		532.9	522.95	Guo et al., 2016
520	Lijiatuo	Xiaoyanxi	18.69	2.15		5018	4853.45	Guo et al., 2016
520	Lijiatuo	Xiaoyanxi	2.96	5.78		41910	41467.6	Guo et al., 2016
520	Lijiatuo	Xiaoyanxi	14.79	2.69		9233	9027.12	Guo et al., 2016
520	Lijiatuo	Xiaoyanxi	5.55	4.59		5467	5115.7	Guo et al., 2016
520	Lijiatuo	Xiaoyanxi	10.05	0.79		2169	2108.54	Guo et al., 2016
520	Lijiatuo	Xiaoyanxi	1.12	4.67		10320	9962.57	Guo et al., 2016
520	Lijiatuo	Xiaoyanxi	2.97	0.21		547.8	531.727	Guo et al., 2016
520	Lijiatuo	Xiaoyanxi	1.54	7.06		2775	2234.65	Guo et al., 2016
520	Lijiatuo	Xiaoyanxi	1.42	6.24		4062	3584.41	Guo et al., 2016
520	Lijiatuo	Xiaoyanxi	1.2	7.04		2165	1626.18	Guo et al., 2016
520	Lijiatuo	Xiaoyanxi	1.4	8.45		2700	2053.26	Guo et al., 2016
520	Lijiatuo	Xiaoyanxi	1.47	8.65		2893	2230.96	Guo et al., 2016
520	Lijiatuo	Xiaoyanxi	17.65	2.15		1071	906.446	Guo et al., 2016
520	Lijiatuo	Xiaoyanxi	8.51	3.97		2800	2496.15	Guo et al., 2016
520	Lijiatuo	Xiaoyanxi	11.48	2.11		219	57.5074	Guo et al., 2016
520	Lijiatuo	Xiaoyanxi	14.32	2.38		993.1	810.942	Guo et al., 2016
520	Lijiatuo	Xiaoyanxi	4.17	2.74		1756	1546.29	Guo et al., 2016
520	Lijiatuo	Xiaoyanxi	10.09	2.35		820.6	640.739	Guo et al., 2016
520	Yuanjia, South China	Niutitang	6.31	2.19		32590	32422.4	Guo et al., 2016
520	Yuanjia	Niutitang	5.67	1.27		48190	48092.8	Guo et al., 2016
520	Yuanjia	Niutitang	3.4	0.58		34170	34125.6	Guo et al., 2016
520	Yuanjia	Niutitang	19.47	2.54		4010	3815.6	Guo et al., 2016
520	Yuanjia	Niutitang	1.26	1.3		16170	16070.5	Guo et al., 2016
520	Yuanjia	Niutitang	12.58	1.04		9054	8974.4	Guo et al., 2016
520	Yuanjia	Niutitang	16.95	1.88		8822	8678.11	Guo et al., 2016
520	Yuanjia	Niutitang	13.22	0.75		1092	1034.6	Guo et al., 2016
520	Yuanjia	Niutitang	4.75	5.7		17330	16893.7	Guo et al., 2016
520	Yuanjia	Niutitang	2.1	5.48		13240	12820.6	Guo et al., 2016
520	Yuanjia	Niutitang	9.77	5.9		10350	9898.43	Guo et al., 2016
520	Yuanjia	Niutitang	14.5	2.06		1175	1017.33	Guo et al., 2016
520	Yuanjia	Niutitang	12.39	1.69		1189	1059.65	Guo et al., 2016
520	Yuanjia	Niutitang	9.2	1.79		3001	2864	Guo et al., 2016
520	Yuanjia	Niutitang	14.82	3.38		16810	16551.3	Guo et al., 2016
520	Yuanjia	Niutitang	12.16	4.26		7064	6737.95	Guo et al., 2016
520	Yuanjia	Niutitang	14.65	3.3		7623	7370.43	Guo et al., 2016
520	Yuanjia	Niutitang	12.05	4.21		3829	3506.78	Guo et al., 2016
520	Yuanjia	Niutitang	13.45	4.29		767.5	439.157	Guo et al., 2016
520	Yuanjia	Niutitang	7.9	3.48		1267	1000.65	Guo et al., 2016
645	Daotuo, South China	Datangpo	0.23	9.34412		796.49	81.3212	This study
645	Daotuo	Datangpo	0.21	9.34412		798.03	82.8612	This study
645	Daotuo	Datangpo	0.23	9.52941		2206.47	1477.12	This study
645	Daotuo	Datangpo	0.17	9.34412		738.94	23.7712	This study
645	Daotuo	Datangpo	0.12	9.71471		772.52	28.9875	This study
645	Daotuo	Datangpo	0.22	9.63529		721.53	0	This study
645	Daotuo	Datangpo	0.11	9.71471		787.88	44.3475	This study
645	Daotuo	Datangpo	0.11	9.45		705.82	0	This study
645	Daotuo	Datangpo	0.17	9.52941		681.88	0	This study
645	Daotuo	Datangpo	0.13	9.79412		744.32	0	This study
645	Daotuo	Datangpo	0.4	9.84706		698.41	0	This study
645	Daotuo	Datangpo	0.12	9.95294		740.85	0	This study
645	Daotuo	Datangpo	0.12	9.63529		676.46	0	This study
645	Daotuo	Datangpo	0.1	9.79412		722.98	0	This study
645	Daotuo	Datangpo	0.09	9.15882		600.01	0	This study
645	Daotuo	Datangpo	0.09	9.82059		694.48	0	This study
645	Daotuo	Datangpo	0.09	9.79412		695.5	0	This study
645	Daotuo	Datangpo	0.17	9.74118		681.64	0	This study
645	Daotuo	Datangpo	0.18	9.82059		687.77	0	This study
645	Daotuo	Datangpo	0.42	9.84706		712.86	0	This study
645	Daotuo	Datangpo	0.24	9.84706		629.43	0	This study
645	Daotuo	Datangpo	0.18	9.82059		652.3	0	This study
645	Daotuo	Datangpo	0.17	9.82059		678.08	0	This study
645	Daotuo	Datangpo	0.17	9.9		671.53	0	This study
645	Daotuo	Datangpo	0.13	9.87353		629.77	0	This study
645	Daotuo	Datangpo	0.49	9.84706		694.13	0	This study
645	Daotuo	Datangpo	0.86	9.71471		640.4	0	This study
645	Daotuo	Datangpo	0.46	9.76765		704.7	0	This study
645	Daotuo	Datangpo	0.8	9.52941		680.33	0	This study
645	Daotuo	Datangpo	2	9.21176		649.72	0	This study
645	Daotuo	Datangpo	1.19	8.73529		584.38	0	This study
645	Daotuo	Datangpo	2.87	8.89412		514.92	0	This study
645	Daotuo	Datangpo	3.73	8.57647		515.08	0	This study
645	Daotuo	Datangpo	4.26	8.23235		656.67	26.5921	This study
645	Daotuo	Datangpo	3.86	8.70882		676.59	10.0445	This study
645	Daotuo	Datangpo	2.44	9		736.68	47.8488	This study
645	Daotuo	Datangpo	2.59	9.29118		705.58	0	This study
645	Daotuo	Datangpo	2.76	8.89412		724.24	43.5127	This study
645	Daotuo	Datangpo	2.61	9.31765		787.96	74.8171	This study
645	Daotuo	Datangpo	3.03	10.2441		742.58	0	This study
645	Daotuo	Datangpo	2.92	9.26471		688.08	0	This study
645	Daotuo	Datangpo	2.78	9.23824		775.47	68.4051	This study
645	Daotuo	Datangpo	3.29	9.42353		752.07	30.8232	This study
645	Daotuo	Datangpo	3.15	9.60882		740.4	4.97143	This study
645	Daotuo	Datangpo	3.2	9.02647		691.65	0.792857	This study
645	Daotuo	Datangpo	4.01	8.70882		731.601	65.0551	This study
645	Daotuo	Datangpo	3.51	8.47059		680.99	32.6783	This study
600	Liantian, South China	D2	0.180661	8.17941		1305.73	679.708	Guan et al., 2014
600	Liantian	D2	0.193291	8.89412		2912.19	2231.47	Guan et al., 2014
600	Liantian	D2	0.16507	8.60294		3430	2771.56	Guan et al., 2014
600	Liantian	D2	0.133271	8.68235		428.929	0	Guan et al., 2014
600	Liantian	D2	0.178628	7.94118		410	0	Guan et al., 2014
600	Liantian	D2	0.210809	8.39118		382.351	0	Guan et al., 2014
600	Liantian	D2	0.211918	8.25882		1205.32	573.219	Guan et al., 2014
600	Liantian	D2	1.07599	8.31176		4522.95	3886.8	Guan et al., 2014
600	Liantian	D2	0.320757	8.31176		3466.29	2830.14	Guan et al., 2014
600	Liantian	D2	0.141495	8.76176		3109.56	2438.96	Guan et al., 2014
600	Liantian	D2	2.43846	7.30588		1770.09	1210.92	Guan et al., 2014
600	Liantian	D2	0.137582	7.49118		3716.19	3142.84	Guan et al., 2014
600	Liantian	D2	4.0219	7.46471		1818.61	1247.29	Guan et al., 2014
600	Liantian	D2		8.20588		195.804	0	Guan et al., 2014
600	Liantian	D2	4.11045	8.73529		770	101.429	Guan et al., 2014
600	Liantian	D2		7.04118		472.156	0	Guan et al., 2014
600	Liantian	D2	1.84547	8.15294		410	0	Guan et al., 2014
600	Liantian	D2	0	6.90882		524.315	0	Guan et al., 2014
600	Liantian	D2	4.85855	8.12647		330	0	Guan et al., 2014
600	Liantian	D2	3.65195	7.86176		447.066	0	Guan et al., 2014
600	Liantian	D2	4.88697	9.05294		360	0	Guan et al., 2014
600	Liantian	D2	4.03437	6.96176		728.917	196.086	Guan et al., 2014
600	Liantian	D2	0.234037	6.88235		1090	563.247	Guan et al., 2014
600	Liantian	D2	7.15051	8.07353		950.193	332.271	Guan et al., 2014
600	Liantian	D2	11.663	8.86765		740	61.2987	Guan et al., 2014
600	Liantian	D2	6.62224	7.35882		1660.24	1097.02	Guan et al., 2014
600	Liantian	D2	8.28018	9.07941		1030	335.091	Guan et al., 2014
600	Liantian	D2	7.82102	8.28529		160.876	0	Guan et al., 2014
600	Liantian	D2	0.708289	8.62941		70	0	Guan et al., 2014
600	Liantian	D2	5.83169	7.94118		518.709	0	Guan et al., 2014
600	Liantian	D2	7.67371	8.39118		133.109	0	Guan et al., 2014
600	Liantian	D2	6.93561	6.53824		117.097	0	Guan et al., 2014
600	Liantian	D2	6.81661	6.19412		142.865	0	Guan et al., 2014
600	Liantian	D2	6.12207	5.85		139.757	0	Guan et al., 2014
600	Liantian	D2	2.8221	6.3		207.272	0	Guan et al., 2014
600	Liantian	D2	0.0817333	10.0588		1413.76	643.888	Guan et al., 2014
600	Liantian	D2	0.179168	7.78235		1109.66	514.021	Guan et al., 2014
600	Liantian	D2	0.41483	7.96765		1031.85	422.035	Guan et al., 2014
600	Liantian	D2		8.02059		975.871	362	Guan et al., 2014
600	Liantian	D2	0.269814	7.70294		445.242	0	Guan et al., 2014
600	Liantian	D2	0.179348	6.64412		744.85	236.331	Guan et al., 2014
600	Liantian	D2		3.73765		675.312	389.244	Guan et al., 2014
600	Liantian	D2	0.17663	6.11471		1320	852	Guan et al., 2014
600	Liantian	D2	0.40737	4.83882		1200	829.652	Guan et al., 2014
600	Liantian	D2	0.293123	6.85588		958.899	434.171	Guan et al., 2014
600	Liantian	D2	0.227668	6.77647		1138.19	619.542	Guan et al., 2014
600	Liantian	D2	0.14141	6.27353		1275.31	795.154	Guan et al., 2014
600	Liantian	D2	0.167727	5.61176		794.19	364.683	Guan et al., 2014
600	Liantian	D2	0.144144	7.88824		264.734	0	Guan et al., 2014
600	Liantian	D2	1.41118	4.71706		65.3765	0	Guan et al., 2014
600	Liantian	D2	2.22106	9.84706		235.066	0	Guan et al., 2014
600	Liantian	D2	0.270478	5.58529		114.217	0	Guan et al., 2014
600	Liantian	D2	2.86968	6.90882		679.228	150.449	Guan et al., 2014
600	Liantian	D2	5.2733	5.19353		775.175	377.679	Guan et al., 2014
600	Liantian	D2	1.23664	5.08765		1545.15	1155.76	Guan et al., 2014
600	Liantian	D2	6.98875	4.53176		1998.91	1652.07	Guan et al., 2014
600	Liantian	D2	10.4804	4.68529		1176.31	817.718	Guan et al., 2014
600	Liantian	D2	10.1771	5.26765		1812.27	1409.1	Guan et al., 2014
600	Liantian	D3	4.43558	3.90706		2583.07	2284.04	Guan et al., 2014
600	Liantian	D3	8.46265	2.65765		2676.72	2473.31	Guan et al., 2014
600	Liantian	D3	7.81806	3.67941		1912.08	1630.47	Guan et al., 2014
600	Liantian	D3	7.61931	4.14529		3201.66	2884.39	Guan et al., 2014
600	Liantian	D3	5.04327	3.93882		2728.27	2426.81	Guan et al., 2014
600	Liantian	D3	0.955295	4.09235		1234.47	921.259	Guan et al., 2014
600	Liantian	D3	1.16877	3.81176		1339	1047.26	Guan et al., 2014
600	Liantian	D3	0.769719	4.55824		1570.84	1221.96	Guan et al., 2014
600	Liantian	D3	1.26068	4.06059		1891.9	1581.11	Guan et al., 2014
555	Liantian	D4	15.22	3.28235		4241.83	3990.61	Guan et al., 2014
555	Liantian	D4	18.76	2.91706		4972.88	4749.62	Guan et al., 2014
555	Liantian	D4		2.94882		3610.05	3384.36	Guan et al., 2014
555	Liantian	D4	19.4609	2.70529		3929.65	3722.59	Guan et al., 2014
555	Liantian	D4		1.78941		3134.69	2997.73	Guan et al., 2014
555	Liantian	D4		2.57294		3034.04	2837.12	Guan et al., 2014
555	Yanjia, South China	Piyuancun Fm.	1.308	0.243111		135.618	117.011	This study
	Yanjia	Piyuancun Fm.	0.895					This study
555	Yanjia	Piyuancun Fm.	1.199	0.297068		402.678	379.941	This study
	Yanjia	Piyuancun Fm.	0.623					This study
555	Yanjia	Piyuancun Fm.	0.542	0.175683		185.926	172.479	This study
555	Yanjia	Piyuancun Fm.	0.395	0.0963931		393.337	385.96	This study
	Yanjia	Piyuancun Fm.	0.113					This study
555	Yanjia	Piyuancun Fm.	0.145	0.177484		151.929	138.345	This study
	Yanjia	Piyuancun Fm.	0.709					This study
555	Yanjia	Piyuancun Fm.	0.982	0.527608		430.502	390.12	This study
	Yanjia	Piyuancun Fm.	1.285	0.471705		417.622	381.519	This study
	Yanjia	Piyuancun Fm.	1.28					This study
535	Yanjia	Piyuancun Fm.	1.636	0.662789		720.144	669.416	This study
	Yanjia	Piyuancun Fm.	1.208					This study
535	Yanjia	Piyuancun Fm.	1.431	0.700361		624.099	570.496	This study
	Yanjia	Piyuancun Fm.	1.554					This study
535	Yanjia	Piyuancun Fm.	1.274	0.40626		160.938	129.844	This study
	Yanjia	Piyuancun Fm.	1.214					This study
535	Yanjia	Piyuancun Fm.	1.774	0.552094		598.156	555.9	This study
535	Yanjia	Piyuancun Fm.	2.028	0.568398		632.017	588.513	This study
535	Yanjia	Piyuancun Fm.	1.847	0.517695		541.829	502.206	This study
535	Yanjia	Piyuancun Fm.	2.512	0.783816		706.065	646.074	This study
535	Yanjia	Piyuancun Fm.	1.941	0.290896		237.296	215.032	This study
535	Yanjia	Piyuancun Fm.	1.433	0.541064		553.055	511.643	This study
520	Yanjia	Hetang Fm.	1.294	0.963955		2926.76	2852.98	This study
520	Yanjia	Hetang Fm.	0.485	5.9489		4597.22	4141.91	This study
520	Yanjia	Hetang Fm.	0.462	6.13548		6126.95	5657.36	This study
520	Yanjia	Hetang Fm.	2.837	1.69029		2613.76	2484.39	This study
520	Yanjia	Hetang Fm.	1.53	1.35109		3971.9	3868.49	This study
520	Yanjia	Hetang Fm.	3.756	1.37358		9720.78	9615.65	This study
520	Yanjia	Hetang Fm.	1.838	0.514195		5360.13	5320.77	This study
520	Yanjia	Hetang Fm.	4.701	1.03676		1329.85	1250.5	This study
520	Yanjia	Hetang Fm.	2.504	0.535679		306.972	265.973	This study
520	Yanjia	Hetang Fm.	1.985	0.562361		470.905	427.864	This study
520	Yanjia	Hetang Fm.	1.173	0.396408		184.609	154.269	This study
520	Yanjia	Hetang Fm.	1.281	0.276943		593.629	572.433	This study
520	Yanjia	Hetang Fm.	1.643	0.516982		237.356	197.788	This study
520	Yanjia	Hetang Fm.	1.325	0.545066		257.964	216.247	This study
520	Yanjia	Hetang Fm.	1.732	0.516548		214.904	175.369	This study
520	Yanjia	Hetang Fm.	1.645	0.355728		241.294	214.067	This study
520	Yanjia	Hetang Fm.	1.262	0.673018		440.687	389.176	This study
520	Yanjia	Hetang Fm.	1.729	0.652512		814.319	764.378	This study
520	Yanjia	Hetang Fm.	1.74	0.771748		636.69	577.623	This study
520	Yanjia	Hetang Fm.	1.14	0.337237		240.85	215.039	This study
520	Yanjia	Hetang Fm.	1.199	0.41163		310.957	279.452	This study
520	Yanjia	Hetang Fm.	2.106	0.803007		750.339	688.88	This study
520	Yanjia	Hetang Fm.		0.484613		346.548	309.457	This study
535	Daotuo	Liuchapo Fm.	0.808717	4.48941		2263.39	1919.78	This study
535	Daotuo	Liuchapo Fm.	0.239984	6.48529		3591.79	3095.43	This study
535	Daotuo	Liuchapo Fm.	2.00985	3.30353		1367.16	1114.32	This study
535	Daotuo	Liuchapo Fm.	0.102004	2.05941		1147.24	989.619	This study
535	Daotuo	Liuchapo Fm.	0.156319	2.72647		1150.86	942.185	This study
535	Daotuo	Jiumenchong Fm.	0.288466	1.51412		562.3	446.414	This study
535	Daotuo	Jiumenchong Fm.	4.56883	3.76941		7567.09	7278.59	This study
535	Daotuo	Jiumenchong Fm.	7.67305	3.15		998.92	757.829	This study
520	Daotuo	Jiumenchong Fm.	7.22211	5.00294		1998.72	1615.81	This study
520	Daotuo	Jiumenchong Fm.	8.09813	7.25294		2943.38	2388.26	This study
520	Daotuo	Jiumenchong Fm.	5.27648	7.14706		2090.72	1543.71	This study
520	Daotuo	Jiumenchong Fm.	6.41295	7.14706		1854.01	1307	This study
520	Daotuo	Jiumenchong Fm.	6.91671	7.35882		2079.11	1515.89	This study
520	Daotuo	Jiumenchong Fm.	5.52287	6.93529		1942.51	1411.7	This study
520	Daotuo	Jiumenchong Fm.	5.30929	6.61765		1946.44	1439.95	This study
520	Daotuo	Jiumenchong Fm.	4.64889	6.22059		1901.27	1425.17	This study
520	Daotuo	Jiumenchong Fm.	3.98356	6.69706		2011.86	1499.29	This study
520	Daotuo	Jiumenchong Fm.	3.84246	6.77647		1958.73	1440.08	This study
520	Daotuo	Jiumenchong Fm.	3.27592	6.06176		1670.74	1206.79	This study
520	Daotuo	Jiumenchong Fm.	3.10605	7.12059		2369.89	1824.9	This study
520	Daotuo	Jiumenchong Fm.	3.01969	7.30588		2407.73	1848.56	This study
520	Daotuo	Jiumenchong Fm.	4.01552	7.33235		1795.41	1234.22	This study
520	Daotuo	Jiumenchong Fm.	4.94822	7.27941		1838.1	1280.96	This study
520	Daotuo	Jiumenchong Fm.	0.624693	7.12059		2230.15	1685.16	This study
520	Daotuo	Jiumenchong Fm.	0.332993	9.37059		2681.97	1964.78	This study
520	Daotuo	Jiumenchong Fm.	0.972658	6.85588		2381.01	1856.28	This study
520	Daotuo	Jiumenchong Fm.	0.401312	8.62941		2762.17	2101.7	This study
520	Daotuo	Jiumenchong Fm.	3.61784	6.59118		2600.03	2095.56	This study
520	Daotuo	Jiumenchong Fm.		4.70118		1967.87	1608.06	This study
520	Daotuo	Jiumenchong Fm.	0.785776	4.27765		2096.92	1769.52	This study
520	Daotuo	Jiumenchong Fm.	0.978503	1.59882				This study
520	Daotuo	Jiumenchong Fm.	0.360155	0.338824				This study
520	Daotuo	Jiumenchong Fm.		2.01176		651.75	497.776	This study
520	Daotuo	Jiumenchong Fm.		0.497647				This study
520	Daotuo	Jiumenchong Fm.	2.80263	7.14706				This study
520	Daotuo	Jiumenchong Fm.		7.01471		1417.4	880.517	This study
520	Daotuo	Jiumenchong Fm.	1.22635	9.68824		1270.08	528.574	This study
520	Daotuo	Jiumenchong Fm.	0.592259	9.87353		1488.97	733.282	This study
520	Daotuo	Jiumenchong Fm.	1.45278	9.74118				This study
520	Daotuo	Jiumenchong Fm.	0.954591	8.94706		1479.79	795.011	This study
520	Daotuo	Jiumenchong Fm.	0.248389	9.37059		1494.61	777.415	This study
520	Daotuo	Jiumenchong Fm.	1.55849	9.74118		1326.65	581.092	This study
520	Daotuo	Jiumenchong Fm.	1.24722	9.76765		1269.05	521.466	This study
520	Daotuo	Jiumenchong Fm.	0.793097	6.88235		847.63	320.877	This study
520	Daotuo	Jiumenchong Fm.	0.598572	3.37235		318.78	60.6709	This study
520	Daotuo	Jiumenchong Fm.	0.203742	6.59118		782.1	277.632	This study
520	Daotuo	Jiumenchong Fm.	0.427761	3.27706		408.76	157.944	This study
520	Daotuo	Jiumenchong Fm.	0.307927	4.83882		494.22	123.872	This study
520	Daotuo	Jiumenchong Fm.	0.100001	1.59882				This study
520	Daotuo	Jiumenchong Fm.	0.238667	2.66294		443.1	239.287	This study
520	Daotuo	Jiumenchong Fm.	0.367812	5.74412		704.25	264.614	This study
520	Daotuo	Jiumenchong Fm.	0.403999	7.46471		260.94	0	This study
520	Daotuo	Jiumenchong Fm.	0.507704	6.40588		627.04	136.754	This study
530	Luojiacun, South China	Shuijingtuo Fm.	1.73	6.28412		1089.47	608.328	Liu et al., 2018
530	Luojiacun	Shuijingtuo Fm.	2.24	2.41941		960	774.759	Liu et al., 2018
530	Luojiacun	Shuijingtuo Fm.	0.88	4.38353		808.038	472.416	Liu et al., 2018
530	Luojiacun	Shuijingtuo Fm.	1.87	8.30647		1025.06	389.084	Liu et al., 2018
530	Luojiacun	Shuijingtuo Fm.		6.00882		692	231.938	Liu et al., 2018
530	Luojiacun	Shuijingtuo Fm.	1.76	4.05529		845	534.509	Liu et al., 2018
530	Luojiacun	Shuijingtuo Fm.	2.11	7.38		925	359.955	Liu et al., 2018
530	Luojiacun	Shuijingtuo Fm.	0.56	2.62059		741	540.357	Liu et al., 2018
530	Luojiacun	Shuijingtuo Fm.	1.71	5.73882		1004.13	564.735	Liu et al., 2018
530	Luojiacun	Shuijingtuo Fm.	2.33	7.71882		890.61	299.622	Liu et al., 2018
530	Luojiacun	Shuijingtuo Fm.	2.04	5.97176		776.949	319.724	Liu et al., 2018
530	Luojiacun	Shuijingtuo Fm.	2.42	7.20529		958.988	407.319	Liu et al., 2018
530	Luojiacun	Shuijingtuo Fm.	2.58	7.53353		838.891	262.091	Liu et al., 2018
530	Luojiacun	Shuijingtuo Fm.	5.01	6.48		817.725	321.588	Liu et al., 2018
530	Luojiacun	Shuijingtuo Fm.	4.62	7.67647		931.732	343.988	Liu et al., 2018
530	Luojiacun	Shuijingtuo Fm.	7.33	4.17176		1077.6	758.193	Liu et al., 2018
530	Luojiacun	Shuijingtuo Fm.	4.62	6.79235		903.303	383.251	Liu et al., 2018
530	Luojiacun	Shuijingtuo Fm.	5.04	5.28882		787.807	382.872	Liu et al., 2018
530	Luojiacun	Shuijingtuo Fm.	5.49	6.03		935.801	474.117	Liu et al., 2018
530	Luojiacun	Shuijingtuo Fm.	6.62	5.82882		1631.1	1184.82	Liu et al., 2018
530	Luojiacun	Shuijingtuo Fm.	8.59	5.37353		916.144	504.722	Liu et al., 2018
530	Luojiacun	Shuijingtuo Fm.	12.47	5.43176		2379.28	1963.4	Liu et al., 2018
530	Luojiacun	Shuijingtuo Fm.	7.21	5.73882		911	471.61	Liu et al., 2018
530	Luojiacun	Shuijingtuo Fm.	9.52	4.59		2379.28	2027.85	Liu et al., 2018
530	Luojiacun	Shuijingtuo Fm.	7.95	3.57882		2342.16	2068.15	Liu et al., 2018
530	Luojiacun	Shuijingtuo Fm.	8.64	3.34059		1102.81	847.04	Liu et al., 2018
530	Luojiacun	Shuijingtuo Fm.	5.23	6.16235		1081	609.183	Liu et al., 2018
530	Luojiacun	Shuijingtuo Fm.	7.23	3.18706		1140.08	896.064	Liu et al., 2018
530	Luojiacun	Shuijingtuo Fm.	7.26	4.25647		16168	15842.1	Liu et al., 2018
530	Luojiacun	Shuijingtuo Fm.	-	3.26647		28381	28130.9	Liu et al., 2018
530	Luojiacun	Shuijingtuo Fm.	7.11	2.97		1016	788.604	Liu et al., 2018
530	Luojiacun	Shuijingtuo Fm.	8.75	4.14		1176	859.023	Liu et al., 2018
530	Luojiacun	Shuijingtuo Fm.	7.28	3.31412		976.564	722.82	Liu et al., 2018
530	Luojiacun	Shuijingtuo Fm.	9.96	1.64647		3728.38	3602.32	Liu et al., 2018
530	Luojiacun	Shuijingtuo Fm.	6.45	4.38353		899.636	564.014	Liu et al., 2018
530	Luojiacun	Shuijingtuo Fm.	6.7	4.76471		1042.88	678.075	Liu et al., 2018
530	Luojiacun	Shuijingtuo Fm.	6.53	4.55294		1260.11	911.514	Liu et al., 2018
530	Luojiacun	Shuijingtuo Fm.	6.89	4.64824		1119.54	763.649	Liu et al., 2018
530	Luojiacun	Shuijingtuo Fm.	8.02	4.42059		1964.69	1626.23	Liu et al., 2018
530	Luojiacun	Shuijingtuo Fm.	6.68	4.55294		2353.71	2005.12	Liu et al., 2018
530	Luojiacun	Shuijingtuo Fm.	5.8	5.45294		1257.13	839.626	Liu et al., 2018
530	Luojiacun	Shuijingtuo Fm.	4.94	6.18882		1463.33	989.49	Liu et al., 2018
530	Luojiacun	Shuijingtuo Fm.	5.52	6.40588		1084.24	593.78	Liu et al., 2018
530	Luojiacun	Shuijingtuo Fm.	6.17	5.4		1047.09	633.639	Liu et al., 2018
530	Luojiacun	Shuijingtuo Fm.	5.87	5.82882		1032.66	586.382	Liu et al., 2018
530	Luojiacun	Shuijingtuo Fm.	6.11	6.09882		1085.43	618.481	Liu et al., 2018
530	Luojiacun	Shuijingtuo Fm.	4.01	1.07471		776.445	694.16	Liu et al., 2018
530	Luojiacun	Shuijingtuo Fm.	6.1	4.86529		1193.09	820.579	Liu et al., 2018
530	Luojiacun	Shuijingtuo Fm.	9.73	2.02765		800	644.754	Liu et al., 2018
530	Luojiacun	Shuijingtuo Fm.	7.1	1.63588		562.692	437.441	Liu et al., 2018
530	Luojiacun	Shuijingtuo Fm.	7.87	4.16118		1089	770.402	Liu et al., 2018
530	Luojiacun	Shuijingtuo Fm.	7.21	3.93353		732.097	430.929	Liu et al., 2018
530	Luojiacun	Shuijingtuo Fm.	-	5.17765		1049	652.576	Liu et al., 2018
530	Luojiacun	Yanjiahe Fm.	2.11238	3.04412		330.451	97.3799	Liu et al., 2018
530	Luojiacun	Yanjiahe Fm.	0.219779	5.54824		480.418	55.6203	Liu et al., 2018
530	Luojiacun	Yanjiahe Fm.	3.03334	0.635294		413.994	365.353	Liu et al., 2018
530	Luojiacun	Yanjiahe Fm.	4.26792	6.03		944.442	482.758	Liu et al., 2018
530	Luojiacun	Yanjiahe Fm.	4.78332	0.381176		109.409	80.2249	Liu et al., 2018
530	Luojiacun	Yanjiahe Fm.	4.34508	5.26235		951.512	548.603	Liu et al., 2018
530	Luojiacun	Yanjiahe Fm.	3.89786	5.39471		982.535	569.492	Liu et al., 2018
530	Luojiacun	Yanjiahe Fm.	4.49902	7.05176		1112.01	572.095	Liu et al., 2018
530	Luojiacun	Yanjiahe Fm.	5.56561	3.25059		574.621	325.741	Liu et al., 2018
530	Luojiacun	Yanjiahe Fm.	4.41278	6.12529		1067.12	598.144	Liu et al., 2018
530	Luojiacun	Yanjiahe Fm.	4.08179	3.92824		772.151	471.388	Liu et al., 2018
530	Luojiacun	Yanjiahe Fm.	3.42785	4.15588		679.433	361.24	Liu et al., 2018
530	Luojiacun	Yanjiahe Fm.	3.18585	4.70647		818.037	457.689	Liu et al., 2018
530	Luojiacun	Yanjiahe Fm.	3.7478	3.66353		645.369	364.873	Liu et al., 2018
530	Luojiacun	Yanjiahe Fm.	3.56219	5.11941		885.011	493.047	Liu et al., 2018
530	Luojiacun	Yanjiahe Fm.	2.90529	6.42706		991.88	499.796	Liu et al., 2018
530	Luojiacun	Yanjiahe Fm.	3.0958	5.47412		786.579	367.457	Liu et al., 2018
530	Luojiacun	Yanjiahe Fm.	4.5284	0.931765		222.549	151.209	Liu et al., 2018
530	Luojiacun	Yanjiahe Fm.	4.28254	2.34529		332.43	152.864	Liu et al., 2018
530	Luojiacun	Yanjiahe Fm.	3.84337	0.905294		165.514	96.2006	Liu et al., 2018
530	Luojiacun	Yanjiahe Fm.	3.78653	1.10118		192.332	108.021	Liu et al., 2018
530	Luojiacun	Yanjiahe Fm.	3.55156	0.72		318.451	263.324	Liu et al., 2018
530	Luojiacun	Yanjiahe Fm.	4.02839	1.07471		207.445	125.16	Liu et al., 2018
530	Luojiacun	Yanjiahe Fm.	3.50587	0.947647		196.1	123.544	Liu et al., 2018
530	Luojiacun	Yanjiahe Fm.	3.67627	4.53176		709.089	362.117	Liu et al., 2018
530	Luojiacun	Yanjiahe Fm.	4.11963	0.915882		225.845	155.721	Liu et al., 2018
530	Luojiacun	Yanjiahe Fm.	4.61687	0.799412		185.493	124.286	Liu et al., 2018
530	Luojiacun	Yanjiahe Fm.	3.40194	5.55882		742.196	316.588	Liu et al., 2018
530	Luojiacun	Yanjiahe Fm.	3.04481	7.13647		972.151	425.751	Liu et al., 2018
530	Luojiacun	Yanjiahe Fm.	4.80847	1.04824		326.02	245.763	Liu et al., 2018
530	Luojiacun	Yanjiahe Fm.	3.39489	3.65824		677.78	397.689	Liu et al., 2018
530	Luojiacun	Yanjiahe Fm.	5.09791	0.905294		185.945	116.631	Liu et al., 2018
530	Luojiacun	Yanjiahe Fm.	3.5015	3.27706		511.063	260.157	Liu et al., 2018
530	Luojiacun	Yanjiahe Fm.	4.85871	1.00588		215.645	138.631	Liu et al., 2018
530	Luojiacun	Yanjiahe Fm.	5.05138	3.65294		352.716	73.0304	Liu et al., 2018
530	Luojiacun	Yanjiahe Fm.	10.0508	0.868235		580.453	513.977	Liu et al., 2018
530	Luojiacun	Yanjiahe Fm.	6.84074	0.735882		329.81	273.467	Liu et al., 2018
530	Luojiacun	Yanjiahe Fm.	5.02049	1.27059		437.947	340.665	Liu et al., 2018
530	Luojiacun	Yanjiahe Fm.	0.847963	0.677647		307.682	255.798	Liu et al., 2018
530	Luojiacun	Yanjiahe Fm.	0.524166	0.688235		93.5942	40.8999	Liu et al., 2018
530	Luojiacun	Yanjiahe Fm.	0.169101	3.51529		254.489	0	Liu et al., 2018
520	Jiulongwan	Shipai Fm	0.07				78.665	Fang et al., 2019
520	Jiulongwan	Shipai Fm					19.965	Fang et al., 2019
520	Jiulongwan	Shuijingtuo Fm	4.32				228.575	Fang et al., 2019
520	Jiulongwan	Shuijingtuo Fm	3.83				430.025	Fang et al., 2019
520	Jiulongwan	Shuijingtuo Fm	5.41				196.175	Fang et al., 2019
520	Jiulongwan	Shuijingtuo Fm	9.38				245.7	Fang et al., 2019
520	Jiulongwan	Shuijingtuo Fm	0.87				74.55	Fang et al., 2019
520	Jiulongwan	Shuijingtuo Fm	3.93				162.975	Fang et al., 2019
520	Jiulongwan	Shuijingtuo Fm	0.12				156	Fang et al., 2019
520	Jiulongwan	Shuijingtuo Fm	0.15				190.85	Fang et al., 2019
520	Jiulongwan	Shuijingtuo Fm	0.18				166.525	Fang et al., 2019
520	Jiulongwan	Shuijingtuo Fm	5.05				431.875	Fang et al., 2019
520	Jiulongwan	Shuijingtuo Fm	5.07				0	Fang et al., 2019
520	Jiulongwan	Shuijingtuo Fm	7.04				312.025	Fang et al., 2019
520	Jiulongwan	Shuijingtuo Fm	4.76				57.55	Fang et al., 2019
520	Jiulongwan	Shuijingtuo Fm	6.41				210.15	Fang et al., 2019
520	Jiulongwan	Shuijingtuo Fm	5.91				0	Fang et al., 2019
520	Jiulongwan	Shuijingtuo Fm	2.6				5045.95	Fang et al., 2019
535	Jiulongwan	Yanjiahe Fm	1.69				825.125	Fang et al., 2019
535	Jiulongwan	Yanjiahe Fm	0.2				74.075	Fang et al., 2019
535	Jiulongwan	Yanjiahe Fm	0.08				97.025	Fang et al., 2019
535	Jiulongwan	Yanjiahe Fm	0.04				145.175	Fang et al., 2019
535	Jiulongwan	Yanjiahe Fm					287.75	Fang et al., 2019
535	Jiulongwan	Yanjiahe Fm	3.46				463.875	Fang et al., 2019
535	Jiulongwan	Yanjiahe Fm	0.34				29.17	Fang et al., 2019
535	Jiulongwan	Yanjiahe Fm	0.58				38.27	Fang et al., 2019
535	Jiulongwan	Yanjiahe Fm	0.33				46.925	Fang et al., 2019
535	Jiulongwan	Yanjiahe Fm	0.3				107.9	Fang et al., 2019
535	Jiulongwan	Yanjiahe Fm	0.46				367.075	Fang et al., 2019
535	Jiulongwan	Yanjiahe Fm	1.22				314.725	Fang et al., 2019
535	Jiulongwan	Yanjiahe Fm	3.01				16.75	Fang et al., 2019
535	Jiulongwan	Yanjiahe Fm	0.28				20.435	Fang et al., 2019
535	Jiulongwan	Yanjiahe Fm	1.39				35.025	Fang et al., 2019
535	Jiulongwan	Yanjiahe Fm	1.38				14.15	Fang et al., 2019
535	Jiulongwan	Yanjiahe Fm	0.34				149.3	Fang et al., 2019
535	Jiulongwan	Yanjiahe Fm	0.37				0	Fang et al., 2019
535	Jiulongwan	Yanjiahe Fm	0.16				32.625	Fang et al., 2019
535	Jiulongwan	Yanjiahe Fm	0.28				0	Fang et al., 2019
535	Jiulongwan	Yanjiahe Fm	0.18				0	Fang et al., 2019
535	Jiulongwan	Yanjiahe Fm	0.13				44.225	Fang et al., 2019
535	Jiulongwan	Yanjiahe Fm	0.08				0	Fang et al., 2019
535	Jiulongwan	Yanjiahe Fm	0.19				31.955	Fang et al., 2019
535	Jiulongwan	Yanjiahe Fm	2.66				0	Fang et al., 2019
535	Jiulongwan	Yanjiahe Fm	0.16				221.325	Fang et al., 2019
535	Jiulongwan	Yanjiahe Fm	0.29				1130.2	Fang et al., 2019
535	Jiulongwan	Yanjiahe Fm	0.17				123.275	Fang et al., 2019
535	Jiulongwan	Yanjiahe Fm	2.16				12.035	Fang et al., 2019
535	Jiulongwan	Yanjiahe Fm	0.12				84.725	Fang et al., 2019
535	Jiulongwan	Yanjiahe Fm	0.11				54.275	Fang et al., 2019
535	Jiulongwan	Yanjiahe Fm	0.17				101.325	Fang et al., 2019
535	Jiulongwan	Yanjiahe Fm	0.04				28.03	Fang et al., 2019
535	Jiulongwan	Yanjiahe Fm	0.58				2522.88	Fang et al., 2019
555	Jiulongwan	Doushantuo Fm (Mem. 4)	1.07				4572.45	Fang et al., 2019
555	Jiulongwan	Doushantuo Fm (Mem. 4)	1.8				383.625	Fang et al., 2019
555	Jiulongwan	Doushantuo Fm (Mem. 4)	2.22				896.65	Fang et al., 2019
555	Jiulongwan	Doushantuo Fm (Mem. 4)	17.93				1239.75	Fang et al., 2019
555	Jiulongwan	Doushantuo Fm (Mem. 4)	13.47				345.475	Fang et al., 2019
555	Jiulongwan	Doushantuo Fm (Mem. 4)	14.23				469.325	Fang et al., 2019
555	Jiulongwan	Doushantuo Fm (Mem. 4)	9.62				491.175	Fang et al., 2019
555	Jiulongwan	Doushantuo Fm (Mem. 4)	6.16				1748.97	Fang et al., 2019
555	Jiulongwan	Doushantuo Fm (Mem. 4)	6.39				2736.93	Fang et al., 2019
555	Jiulongwan	Doushantuo Fm (Mem. 4)	3.14				1113.45	Fang et al., 2019
555	Jiulongwan	Doushantuo Fm (Mem. 4)	3.03				2983.5	Fang et al., 2019
555	Jiulongwan	Doushantuo Fm (Mem. 4)	1.49				1117.67	Fang et al., 2019
600	Jiulongwan	Doushantuo Fm (Mem. 2)	1.41				716.025	Fang et al., 2019
600	Jiulongwan	Doushantuo Fm (Mem. 2)					130.85	Fang et al., 2019
600	Jiulongwan	Doushantuo Fm (Mem. 2)					0	Fang et al., 2019
600	Jiulongwan	Doushantuo Fm (Mem. 2)					0	Fang et al., 2019
600	Jiulongwan	Doushantuo Fm (Mem. 2)					0	Fang et al., 2019
600	Jiulongwan	Doushantuo Fm (Mem. 2)					0	Fang et al., 2019
600	Jiulongwan	Doushantuo Fm (Mem. 2)					61.925	Fang et al., 2019
600	Jiulongwan	Doushantuo Fm (Mem. 2)					0	Fang et al., 2019
600	Jiulongwan	Doushantuo Fm (Mem. 2)					0	Fang et al., 2019
600	Jiulongwan	Doushantuo Fm (Mem. 2)					0	Fang et al., 2019
600	Jiulongwan	Doushantuo Fm (Mem. 2)					0	Fang et al., 2019
600	Jiulongwan	Doushantuo Fm (Mem. 2)					0	Fang et al., 2019
600	Jiulongwan	Doushantuo Fm (Mem. 2)					0	Fang et al., 2019
600	Jiulongwan	Doushantuo Fm (Mem. 2)					15.15	Fang et al., 2019
600	Jiulongwan	Doushantuo Fm (Mem. 2)					39.325	Fang et al., 2019
600	Jiulongwan	Doushantuo Fm (Mem. 2)					6.175	Fang et al., 2019
600	Jiulongwan	Doushantuo Fm (Mem. 2)					86.65	Fang et al., 2019
600	Jiulongwan	Doushantuo Fm (Mem. 2)					0	Fang et al., 2019
600	Jiulongwan	Doushantuo Fm (Mem. 2)					20.05	Fang et al., 2019
600	Jiulongwan	Doushantuo Fm (Mem. 2)					2.515	Fang et al., 2019
600	Jiulongwan	Doushantuo Fm (Mem. 2)					82.95	Fang et al., 2019
600	Jiulongwan	Doushantuo Fm (Mem. 2)					491.95	Fang et al., 2019
600	Jiulongwan	Doushantuo Fm (Mem. 2)					187.175	Fang et al., 2019
600	Jiulongwan	Doushantuo Fm (Mem. 2)					97.85	Fang et al., 2019
600	Jiulongwan	Doushantuo Fm (Mem. 2)					6.54	Fang et al., 2019
600	Jiulongwan	Doushantuo Fm (Mem. 2)					41.5	Fang et al., 2019
600	Jiulongwan	Doushantuo Fm (Mem. 2)					412.725	Fang et al., 2019
600	Jiulongwan	Doushantuo Fm (Mem. 2)					0	Fang et al., 2019
600	Jiulongwan	Doushantuo Fm (Mem. 2)					0	Fang et al., 2019
600	Jiulongwan	Doushantuo Fm (Mem. 2)					0	Fang et al., 2019
600	Jiulongwan	Doushantuo Fm (Mem. 2)					0	Fang et al., 2019
600	Jiulongwan	Doushantuo Fm (Mem. 2)					0	Fang et al., 2019
600	Jiulongwan	Doushantuo Fm (Mem. 2)					0	Fang et al., 2019
600	Jiulongwan	Doushantuo Fm (Mem. 2)					0	Fang et al., 2019
600	Jiulongwan	Doushantuo Fm (Mem. 2)					0	Fang et al., 2019
600	Jiulongwan	Doushantuo Fm (Mem. 2)					0	Fang et al., 2019
600	Jiulongwan	Doushantuo Fm (Mem. 2)					0	Fang et al., 2019
600	Jiulongwan	Doushantuo Fm (Mem. 2)					0	Fang et al., 2019
600	Jiulongwan	Doushantuo Fm (Mem. 2)					0	Fang et al., 2019
600	Jiulongwan	Doushantuo Fm (Mem. 2)					0	Fang et al., 2019
600	Jiulongwan	Doushantuo Fm (Mem. 2)					0	Fang et al., 2019
600	Jiulongwan	Doushantuo Fm (Mem. 2)					0	Fang et al., 2019
600	Jiulongwan	Doushantuo Fm (Mem. 2)					0	Fang et al., 2019
600	Jiulongwan	Doushantuo Fm (Mem. 2)					0	Fang et al., 2019
600	Jiulongwan	Doushantuo Fm (Mem. 2)					0	Fang et al., 2019
600	Jiulongwan	Doushantuo Fm (Mem. 2)					0	Fang et al., 2019
600	Jiulongwan	Doushantuo Fm (Mem. 2)					0	Fang et al., 2019
600	Jiulongwan	Doushantuo Fm (Mem. 2)					151.45	Fang et al., 2019
600	Jiulongwan	Doushantuo Fm (Mem. 2)					0	Fang et al., 2019
600	Jiulongwan	Doushantuo Fm (Mem. 2)					0	Fang et al., 2019
600	Jiulongwan	Doushantuo Fm (Mem. 2)					0	Fang et al., 2019
600	Jiulongwan	Doushantuo Fm (Mem. 2)					0	Fang et al., 2019
600	Jiulongwan	Doushantuo Fm (Mem. 2)					0	Fang et al., 2019
600	Jiulongwan	Doushantuo Fm (Mem. 2)					0	Fang et al., 2019
600	Jiulongwan	Doushantuo Fm (Mem. 2)					0	Fang et al., 2019
600	Jiulongwan	Doushantuo Fm (Mem. 2)					8.95	Fang et al., 2019
600	Jiulongwan	Doushantuo Fm (Mem. 2)					0	Fang et al., 2019
600	Jiulongwan	Doushantuo Fm (Mem. 2)					0	Fang et al., 2019
600	Jiulongwan	Doushantuo Fm (Mem. 2)					0	Fang et al., 2019
600	Jiulongwan	Doushantuo Fm (Mem. 2)					0	Fang et al., 2019
600	Jiulongwan	Doushantuo Fm (Mem. 2)					0	Fang et al., 2019
600	Jiulongwan	Doushantuo Fm (Mem. 2)					0	Fang et al., 2019
600	Jiulongwan	Doushantuo Fm (Mem. 2)					0	Fang et al., 2019
600	Jiulongwan	Doushantuo Fm (Mem. 2)					0	Fang et al., 2019
600	Jiulongwan	Doushantuo Fm (Mem. 2)					0	Fang et al., 2019
600	Jiulongwan	Doushantuo Fm (Mem. 2)					0	Fang et al., 2019
600	Jiulongwan	Doushantuo Fm (Mem. 2)					0	Fang et al., 2019
600	Jiulongwan	Doushantuo Fm (Mem. 2)					0	Fang et al., 2019
600	Jiulongwan	Doushantuo Fm (Mem. 2)					0	Fang et al., 2019
600	Jiulongwan	Doushantuo Fm (Mem. 2)					0	Fang et al., 2019
600	Jiulongwan	Doushantuo Fm (Mem. 2)					0	Fang et al., 2019
600	Jiulongwan	Doushantuo Fm (Mem. 2)					0	Fang et al., 2019
600	Jiulongwan	Doushantuo Fm (Mem. 2)					4.775	Fang et al., 2019
600	Jiulongwan	Doushantuo Fm (Mem. 2)					0	Fang et al., 2019
600	Jiulongwan	Doushantuo Fm (Mem. 2)					0	Fang et al., 2019
600	Jiulongwan	Doushantuo Fm (Mem. 2)					0	Fang et al., 2019
600	Jiulongwan	Doushantuo Fm (Mem. 2)					0	Fang et al., 2019
600	Jiulongwan	Doushantuo Fm (Mem. 2)					0	Fang et al., 2019
600	Jiulongwan	Doushantuo Fm (Mem. 2)					0	Fang et al., 2019
600	Jiulongwan	Doushantuo Fm (Mem. 2)					0	Fang et al., 2019
600	Jiulongwan	Doushantuo Fm (Mem. 2)					0	Fang et al., 2019
600	Jiulongwan	Doushantuo Fm (Mem. 2)					0	Fang et al., 2019
600	Jiulongwan	Doushantuo Fm (Mem. 2)					0	Fang et al., 2019
600	Jiulongwan	Doushantuo Fm (Mem. 2)					0	Fang et al., 2019
600	Jiulongwan	Doushantuo Fm (Mem. 2)					0	Fang et al., 2019
600	Jiulongwan	Doushantuo Fm (Mem. 2)					0	Fang et al., 2019
600	Jiulongwan	Doushantuo Fm (Mem. 2)					0	Fang et al., 2019
600	Jiulongwan	Doushantuo Fm (Mem. 2)					0	Fang et al., 2019
600	Jiulongwan	Doushantuo Fm (Mem. 2)					0	Fang et al., 2019
600	Jiulongwan	Doushantuo Fm (Mem. 2)					0	Fang et al., 2019
600	Jiulongwan	Doushantuo Fm (Mem. 2)					0	Fang et al., 2019
600	Jiulongwan	Doushantuo Fm (Mem. 2)					0	Fang et al., 2019
600	Jiulongwan	Doushantuo Fm (Mem. 2)					0	Fang et al., 2019
600	Jiulongwan	Doushantuo Fm (Mem. 2)					0	Fang et al., 2019
600	Jiulongwan	Doushantuo Fm (Mem. 2)					0	Fang et al., 2019
600	Jiulongwan	Doushantuo Fm (Mem. 2)					0	Fang et al., 2019
600	Jiulongwan	Doushantuo Fm (Mem. 2)					0	Fang et al., 2019
600	Jiulongwan	Doushantuo Fm (Mem. 2)					0	Fang et al., 2019
600	Jiulongwan	Doushantuo Fm (Mem. 2)					0	Fang et al., 2019
600	Jiulongwan	Doushantuo Fm (Mem. 2)					0	Fang et al., 2019
600	Jiulongwan	Doushantuo Fm (Mem. 2)					0	Fang et al., 2019
600	Jiulongwan	Doushantuo Fm (Mem. 2)					0	Fang et al., 2019
600	Jiulongwan	Doushantuo Fm (Mem. 2)					0	Fang et al., 2019
600	Jiulongwan	Doushantuo Fm (Mem. 2)					0	Fang et al., 2019
600	Jiulongwan	Doushantuo Fm (Mem. 2)					0	Fang et al., 2019
600	Jiulongwan	Doushantuo Fm (Mem. 2)					0	Fang et al., 2019
600	Jiulongwan	Doushantuo Fm (Mem. 2)					82.925	Fang et al., 2019
600	Jiulongwan	Doushantuo Fm (Mem. 2)					3.095	Fang et al., 2019
600	Jiulongwan	Doushantuo Fm (Mem. 2)					20.7	Fang et al., 2019
600	Jiulongwan	Doushantuo Fm (Mem. 2)					19.23	Fang et al., 2019
600	Jiulongwan	Doushantuo Fm (Mem. 2)					3.445	Fang et al., 2019
600	Jiulongwan	Doushantuo Fm (Mem. 2)					0	Fang et al., 2019
600	Jiulongwan	Doushantuo Fm (Mem. 2)					0	Fang et al., 2019
600	Jiulongwan	Doushantuo Fm (Mem. 2)					0	Fang et al., 2019
600	Jiulongwan	Doushantuo Fm (Mem. 2)					0	Fang et al., 2019
600	Jiulongwan	Doushantuo Fm (Mem. 2)					0	Fang et al., 2019
600	Jiulongwan	Doushantuo Fm (Mem. 2)					4.285	Fang et al., 2019
600	Jiulongwan	Doushantuo Fm (Mem. 2)					19.1	Fang et al., 2019
600	Jiulongwan	Doushantuo Fm (Mem. 2)					357.475	Fang et al., 2019
600	Jiulongwan	Doushantuo Fm (Mem. 2)					11.35	Fang et al., 2019
600	Jiulongwan	Doushantuo Fm (Mem. 2)					326.825	Fang et al., 2019
600	Jiulongwan	Doushantuo Fm (Mem. 2)					0	Fang et al., 2019
600	Jiulongwan	Doushantuo Fm (Mem. 2)					0	Fang et al., 2019
600	Jiulongwan	Doushantuo Fm (Mem. 2)					0	Fang et al., 2019
600	Jiulongwan	Doushantuo Fm (Mem. 2)					9.375	Fang et al., 2019
600	Jiulongwan	Doushantuo Fm (Mem. 2)					116.075	Fang et al., 2019
600	Jiulongwan	Doushantuo Fm (Mem. 2)					312.3	Fang et al., 2019
600	Jiulongwan	Doushantuo Fm (Mem. 2)					191.6	Fang et al., 2019
600	Jiulongwan	Doushantuo Fm (Mem. 2)					0	Fang et al., 2019
600	Jiulongwan	Doushantuo Fm (Mem. 2)					0	Fang et al., 2019
600	Jiulongwan	Doushantuo Fm (Mem. 2)					282.3	Fang et al., 2019
600	Jiulongwan	Doushantuo Fm (Mem. 2)					0	Fang et al., 2019
600	Jiulongwan	Doushantuo Fm (Mem. 2)					20.325	Fang et al., 2019
600	Jiulongwan	Doushantuo Fm (Mem. 2)					10.755	Fang et al., 2019
600	Jiulongwan	Doushantuo Fm (Mem. 2)					0	Fang et al., 2019
600	Jiulongwan	Doushantuo Fm (Mem. 2)					7.465	Fang et al., 2019
600	Jiulongwan	Doushantuo Fm (Mem. 2)					32.65	Fang et al., 2019
600	Jiulongwan	Doushantuo Fm (Mem. 2)					10.375	Fang et al., 2019
600	Jiulongwan	Doushantuo Fm (Mem. 2)					88.45	Fang et al., 2019
600	Jiulongwan	Doushantuo Fm (Mem. 2)					69.4	Fang et al., 2019
600	Jiulongwan	Doushantuo Fm (Mem. 2)					22.325	Fang et al., 2019
600	Jiulongwan	Doushantuo Fm (Mem. 2)					201.825	Fang et al., 2019
600	Jiulongwan	Doushantuo Fm (Mem. 2)					253.65	Fang et al., 2019
600	Jiulongwan	Doushantuo Fm (Mem. 2)					88.275	Fang et al., 2019
600	Jiulongwan	Doushantuo Fm (Mem. 2)					94.925	Fang et al., 2019
600	Jiulongwan	Doushantuo Fm (Mem. 2)					330.025	Fang et al., 2019
600	Jiulongwan	Doushantuo Fm (Mem. 2)					97.4	Fang et al., 2019
600	Jiulongwan	Doushantuo Fm (Mem. 2)					281.575	Fang et al., 2019
600	Jiulongwan	Doushantuo Fm (Mem. 2)					332.575	Fang et al., 2019
600	Jiulongwan	Doushantuo Fm (Mem. 2)					134.95	Fang et al., 2019
600	Jiulongwan	Doushantuo Fm (Mem. 2)					151.775	Fang et al., 2019
600	Jiulongwan	Doushantuo Fm (Mem. 2)					407.025	Fang et al., 2019
600	Jiulongwan	Doushantuo Fm (Mem. 2)					536.725	Fang et al., 2019
600	Jiulongwan	Doushantuo Fm (Mem. 2)					5040.35	Fang et al., 2019
600	Jiulongwan	Doushantuo Fm (Mem. 2)					673.075	Fang et al., 2019
600	Jiulongwan	Doushantuo Fm (Mem. 2)					678.725	Fang et al., 2019
600	Jiulongwan	Doushantuo Fm (Mem. 2)					297.225	Fang et al., 2019
600	Jiulongwan	Doushantuo Fm (Mem. 2)					13.59	Fang et al., 2019
600	Jiulongwan	Doushantuo Fm (Mem. 2)					18.205	Fang et al., 2019
600	Jiulongwan	Doushantuo Fm (Mem. 2)					24.685	Fang et al., 2019
600	Jiulongwan	Doushantuo Fm (Mem. 2)					0	Fang et al., 2019
600	Jiulongwan	Doushantuo Fm (Mem. 2)					0	Fang et al., 2019
600	Jiulongwan	Doushantuo Fm (Mem. 2)					0	Fang et al., 2019
600	Jiulongwan	Doushantuo Fm (Mem. 2)					39.3	Fang et al., 2019
600	Jiulongwan	Doushantuo Fm (Mem. 2)					0	Fang et al., 2019
600	Jiulongwan	Doushantuo Fm (Mem. 2)					85.2	Fang et al., 2019
600	Jiulongwan	Doushantuo Fm (Mem. 2)					234.2	Fang et al., 2019
520	Songlin, South China	Niutitang Fm	3.49659				1426.1	Fang et al., 2019
520	Songlin	Niutitang Fm	4.56442				1178.6	Fang et al., 2019
520	Songlin	Niutitang Fm	4.5962				1194.3	Fang et al., 2019
520	Songlin	Niutitang Fm	5.84737				1294.85	Fang et al., 2019
520	Songlin	Niutitang Fm	4.60131				1614.5	Fang et al., 2019
520	Songlin	Niutitang Fm	1.02742				1460.45	Fang et al., 2019
520	Songlin	Niutitang Fm	3.70031				1359.65	Fang et al., 2019
520	Songlin	Niutitang Fm	1.43649				1378.1	Fang et al., 2019
520	Songlin	Niutitang Fm	3.25342				1438.25	Fang et al., 2019
520	Songlin	Niutitang Fm	1.5713				1536.7	Fang et al., 2019
520	Songlin	Niutitang Fm	3.74007				0	Fang et al., 2019
520	Songlin	Niutitang Fm	6.69387				0	Fang et al., 2019
520	Songlin	Niutitang Fm	5.14033				0	Fang et al., 2019
520	Songlin	Niutitang Fm	9.11871				0	Fang et al., 2019
520	Songlin	Niutitang Fm	1.60487				0	Fang et al., 2019
520	Songlin	Niutitang Fm	1.01581				258.55	Fang et al., 2019
535	Songlin	Niutitang Fm	1.88194				482.45	Fang et al., 2019
535	Songlin	Niutitang Fm	4.22717				0	Fang et al., 2019
535	Songlin	Niutitang Fm	0.495273				514.9	Fang et al., 2019
600	Songlin	Doushantuo Fm	3.05418				1303.2	Fang et al., 2019
600	Songlin	Doushantuo Fm	2.58529				263.2	Fang et al., 2019
600	Songlin	Doushantuo Fm	2.51983				509.8	Fang et al., 2019
600	Songlin	Doushantuo Fm	2.31756				0	Fang et al., 2019
600	Songlin	Doushantuo Fm	1.68619				0	Fang et al., 2019
600	Songlin	Doushantuo Fm	2.00468				0	Fang et al., 2019
600	Songlin	Doushantuo Fm	1.54041				43	Fang et al., 2019
600	Songlin	Doushantuo Fm	0.766458				141.9	Fang et al., 2019
600	Songlin	Doushantuo Fm	1.55947				680.5	Fang et al., 2019
600	Songlin	Doushantuo Fm	1.84473				779.3	Fang et al., 2019
600	Songlin	Doushantuo Fm	2.2867				371.45	Fang et al., 2019
600	Songlin	Doushantuo Fm	1.11915				709.4	Fang et al., 2019
600	Songlin	Doushantuo Fm	0.0715215				299.1	Fang et al., 2019
600	Songlin	Doushantuo Fm	0.359535				243.65	Fang et al., 2019
600	Songlin	Doushantuo Fm	0.215544				410.05	Fang et al., 2019
600	Songlin	Doushantuo Fm	0.0730748				0	Fang et al., 2019
600	Songlin	Doushantuo Fm	0.0639863				1011.25	Fang et al., 2019
600	Songlin	Doushantuo Fm	0.0725681				590.6	Fang et al., 2019
600	Songlin	Doushantuo Fm	0.158265				464.35	Fang et al., 2019
600	Songlin	Doushantuo Fm	0.0666546				93.35	Fang et al., 2019
600	Songlin	Doushantuo Fm	0.0576197				0	Fang et al., 2019
600	Songlin	Doushantuo Fm	0.0515116				0	Fang et al., 2019
600	Songlin	Doushantuo Fm	0.0594214				0	Fang et al., 2019
600	Songlin	Doushantuo Fm	0.0617778				0	Fang et al., 2019
600	Songlin	Doushantuo Fm	0.19042				0	Fang et al., 2019
600	Songlin	Doushantuo Fm	0.18643				0	Fang et al., 2019
600	Songlin	Doushantuo Fm	0.174894				0	Fang et al., 2019
600	Songlin	Doushantuo Fm	0.139255				0	Fang et al., 2019
600	Songlin	Doushantuo Fm	0.0612014				0	Fang et al., 2019
600	Songlin	Doushantuo Fm	0.173337				0	Fang et al., 2019
600	Songlin	Doushantuo Fm	0.13064				0	Fang et al., 2019
600	Songlin	Doushantuo Fm	0.150352				0	Fang et al., 2019
600	Songlin	Doushantuo Fm	0.121587				0	Fang et al., 2019
600	Songlin	Doushantuo Fm	0.0641424				0	Fang et al., 2019
600	Songlin	Doushantuo Fm	0.070305				0	Fang et al., 2019
600	Songlin	Doushantuo Fm	0.231389				1021.5	Fang et al., 2019
600	Songlin	Doushantuo Fm	0.128804				148.5	Fang et al., 2019
600	Songlin	Doushantuo Fm	0.125723				110.25	Fang et al., 2019
600	Songlin	Doushantuo Fm	0.0584942				170.25	Fang et al., 2019
600	Songlin	Doushantuo Fm	0.107521				134.05	Fang et al., 2019
600	Songlin	Doushantuo Fm	0.06099				1087	Fang et al., 2019
520	Dongkanshang, South China	Niutitang Fm	2.14866				2449.5	Fang et al., 2019
520	Dongkanshang	Niutitang Fm	6.68919				1259.35	Fang et al., 2019
520	Dongkanshang	Niutitang Fm	3.14082				2939	Fang et al., 2019
520	Dongkanshang	Niutitang Fm	0.415365				1358.3	Fang et al., 2019
520	Dongkanshang	Niutitang Fm	7.06726				1002.5	Fang et al., 2019
520	Dongkanshang	Niutitang Fm	7.63278				1496.3	Fang et al., 2019
520	Dongkanshang	Niutitang Fm	8.72225				1483.45	Fang et al., 2019
520	Dongkanshang	Niutitang Fm	7.90287				1862.65	Fang et al., 2019
520	Dongkanshang	Niutitang Fm	6.85091				1663.55	Fang et al., 2019
520	Dongkanshang	Niutitang Fm	3.83409				2349.65	Fang et al., 2019
520	Dongkanshang	Niutitang Fm	3.48624				2703.45	Fang et al., 2019
520	Dongkanshang	Niutitang Fm	4.17326				3045.25	Fang et al., 2019
520	Dongkanshang	Niutitang Fm	3.35354				1861.15	Fang et al., 2019
520	Dongkanshang	Niutitang Fm	2.98144				1953.3	Fang et al., 2019
520	Dongkanshang	Niutitang Fm	6.52533				1442.25	Fang et al., 2019
520	Dongkanshang	Niutitang Fm	6.66604				1819.2	Fang et al., 2019
520	Dongkanshang	Niutitang Fm	6.18364				1798.65	Fang et al., 2019
520	Dongkanshang	Niutitang Fm	5.48473				1518.55	Fang et al., 2019
535	Dongkanshang	Niutitang Fm	5.02245				1425.55	Fang et al., 2019
535	Dongkanshang	Niutitang Fm	4.43704				1387.3	Fang et al., 2019
535	Dongkanshang	Niutitang Fm	5.90505				1682.8	Fang et al., 2019
535	Dongkanshang	Niutitang Fm	4.84586				609.25	Fang et al., 2019
535	Dongkanshang	Niutitang Fm	7.08944				1760.05	Fang et al., 2019
535	Dongkanshang	Niutitang Fm	6.47748				1403.5	Fang et al., 2019
535	Dongkanshang	Niutitang Fm	5.76036				1795.85	Fang et al., 2019
535	Dongkanshang	Niutitang Fm	4.28111				1703	Fang et al., 2019
535	Dongkanshang	Niutitang Fm	5.34991				1185.75	Fang et al., 2019
535	Dongkanshang	Niutitang Fm	5.77962				1420.95	Fang et al., 2019
535	Dongkanshang	Niutitang Fm	5.4652				855.6	Fang et al., 2019
535	Dongkanshang	Niutitang Fm	6.17073				989.25	Fang et al., 2019
535	Dongkanshang	Niutitang Fm	6.36385				1065.75	Fang et al., 2019
535	Dongkanshang	Niutitang Fm	6.44734				1269.25	Fang et al., 2019
535	Dongkanshang	Niutitang Fm	0.680955				0	Fang et al., 2019
535	Dongkanshang	Niutitang Fm	6.14404				1343.25	Fang et al., 2019
535	Dongkanshang	Niutitang Fm	6.03698				1349.85	Fang et al., 2019
535	Dongkanshang	Niutitang Fm	6.16935				1505.3	Fang et al., 2019
535	Dongkanshang	Niutitang Fm	6.18209				1631	Fang et al., 2019
535	Dongkanshang	Niutitang Fm	6.10886				1456.85	Fang et al., 2019
535	Dongkanshang	Niutitang Fm	6.01007				1528	Fang et al., 2019
535	Dongkanshang	Niutitang Fm	5.33116				1247.9	Fang et al., 2019
535	Dongkanshang	Niutitang Fm	5.91204				1815	Fang et al., 2019
535	Dongkanshang	Niutitang Fm	5.81618				1555.15	Fang et al., 2019
535	Dongkanshang	Niutitang Fm	5.76174				1249	Fang et al., 2019
535	Dongkanshang	Niutitang Fm	5.77134				1862.95	Fang et al., 2019
535	Dongkanshang	Niutitang Fm	7.03433				1878.6	Fang et al., 2019
535	Dongkanshang	Niutitang Fm	6.22253				2021.4	Fang et al., 2019
535	Dongkanshang	Niutitang Fm	6.09228				1977.25	Fang et al., 2019
535	Dongkanshang	Niutitang Fm	2.91372				2112.95	Fang et al., 2019
535	Dongkanshang	Niutitang Fm	2.94235				2181.55	Fang et al., 2019
535	Dongkanshang	Niutitang Fm	3.29116				2532.05	Fang et al., 2019
535	Dongkanshang	Niutitang Fm	2.40542				1545.45	Fang et al., 2019
535	Dongkanshang	Niutitang Fm	7.04613				3038.35	Fang et al., 2019
535	Dongkanshang	Niutitang Fm	5.51784				1547.8	Fang et al., 2019
535	Dongkanshang	Niutitang Fm	4.67682				2600.45	Fang et al., 2019
535	Dongkanshang	Niutitang Fm	2.57256				1890.4	Fang et al., 2019
535	Dongkanshang	Niutitang Fm	3.42902				1766.1	Fang et al., 2019
535	Dongkanshang	Niutitang Fm	2.87847				1642.3	Fang et al., 2019
555	Dongkanshang	Doushantuo Fm	0.0365662				2007.5	Fang et al., 2019
555	Dongkanshang	Doushantuo Fm	0.0328424				675.05	Fang et al., 2019
555	Dongkanshang	Doushantuo Fm	0.0632472				4490.85	Fang et al., 2019
555	Dongkanshang	Doushantuo Fm	0.0702429				6043.45	Fang et al., 2019
555	Dongkanshang	Doushantuo Fm	0.0198646				754.6	Fang et al., 2019
555	Dongkanshang	Doushantuo Fm	0.0243985				1075.4	Fang et al., 2019
600	Dongkanshang	Doushantuo Fm	0.143862				88.95	Fang et al., 2019
600	Dongkanshang	Doushantuo Fm	1.38526				470.45	Fang et al., 2019
600	Dongkanshang	Doushantuo Fm	2.29817				534.85	Fang et al., 2019
600	Dongkanshang	Doushantuo Fm	0.544149				1008.05	Fang et al., 2019
600	Dongkanshang	Doushantuo Fm	0.237028				154.4	Fang et al., 2019
600	Dongkanshang	Doushantuo Fm	0.302164				111	Fang et al., 2019
600	Dongkanshang	Doushantuo Fm	0.321047				59.45	Fang et al., 2019
600	Dongkanshang	Doushantuo Fm	0.401868				68.65	Fang et al., 2019
520	Fengtan, South China	Shipai Fm	13.0522				538	Fang et al., 2019
520	Fengtan	Niutitang Fm	5.32087				2106.45	Fang et al., 2019
520	Fengtan	Niutitang Fm	2.17938				2491.15	Fang et al., 2019
520	Fengtan	Niutitang Fm	2.82804				3126.2	Fang et al., 2019
520	Fengtan	Niutitang Fm	1.55727				2962.05	Fang et al., 2019
520	Fengtan	Niutitang Fm	1.83614				3230.45	Fang et al., 2019
520	Fengtan	Niutitang Fm	2.03743				1673.7	Fang et al., 2019
520	Fengtan	Niutitang Fm	2.03728				3233.7	Fang et al., 2019
520	Fengtan	Niutitang Fm	1.59055				3043.85	Fang et al., 2019
520	Fengtan	Niutitang Fm	2.02857				3553.95	Fang et al., 2019
520	Fengtan	Niutitang Fm	2.32031				3591.85	Fang et al., 2019
520	Fengtan	Niutitang Fm	1.14231				3407.15	Fang et al., 2019
520	Fengtan	Niutitang Fm	1.92396				3971.5	Fang et al., 2019
520	Fengtan	Niutitang Fm	3.08062				3484.05	Fang et al., 2019
520	Fengtan	Niutitang Fm	2.91734				3969	Fang et al., 2019
520	Fengtan	Niutitang Fm	2.74559				6436.1	Fang et al., 2019
520	Fengtan	Niutitang Fm	6.30596				5074.35	Fang et al., 2019
520	Fengtan	Niutitang Fm	1.05623				7121.05	Fang et al., 2019
520	Fengtan	Niutitang Fm	0.515224				7339.45	Fang et al., 2019
520	Fengtan	Niutitang Fm	0.0390244				5035.65	Fang et al., 2019
520	Fengtan	Niutitang Fm	8.7482				4356.2	Fang et al., 2019
520	Fengtan	Niutitang Fm	12.8906				3302.5	Fang et al., 2019
535	Fengtan	Liuchapo Fm	7.53337				3440.7	Fang et al., 2019
535	Fengtan	Liuchapo Fm	5.34754				3640.45	Fang et al., 2019
535	Fengtan	Liuchapo Fm	6.67384				1204.4	Fang et al., 2019
535	Fengtan	Liuchapo Fm	4.55138				2590.1	Fang et al., 2019
535	Fengtan	Liuchapo Fm	3.9113				1839.45	Fang et al., 2019
535	Fengtan	Liuchapo Fm	2.95825				1637.25	Fang et al., 2019
535	Fengtan	Liuchapo Fm	2.22057				1592.7	Fang et al., 2019
535	Fengtan	Liuchapo Fm	5.09258				1933.6	Fang et al., 2019
535	Fengtan	Liuchapo Fm	4.78755				983.75	Fang et al., 2019
535	Fengtan	Liuchapo Fm	1.036				1514.4	Fang et al., 2019
535	Fengtan	Liuchapo Fm	0.447779				1814.85	Fang et al., 2019
535	Fengtan	Liuchapo Fm	1.05799				1511.8	Fang et al., 2019
535	Fengtan	Liuchapo Fm	0.200826				4935.05	Fang et al., 2019
535	Fengtan	Liuchapo Fm	1.15713				1116.35	Fang et al., 2019
535	Fengtan	Liuchapo Fm	1.05882				2065.05	Fang et al., 2019
535	Fengtan	Liuchapo Fm	0.751547				1797.9	Fang et al., 2019
535	Fengtan	Liuchapo Fm	1.04675				2265.55	Fang et al., 2019
535	Fengtan	Liuchapo Fm	1.12878				1204.4	Fang et al., 2019
535	Fengtan	Liuchapo Fm	1.25649				592.7	Fang et al., 2019
535	Fengtan	Liuchapo Fm	0.798396				834.65	Fang et al., 2019
535	Fengtan	Liuchapo Fm	1.18013				374.65	Fang et al., 2019
535	Fengtan	Liuchapo Fm	1.21876				455.3	Fang et al., 2019
535	Fengtan	Liuchapo Fm	0.0668617				69.2	Fang et al., 2019
535	Fengtan	Liuchapo Fm	1.28983				384.9	Fang et al., 2019
535	Fengtan	Liuchapo Fm	1.31084				1690.95	Fang et al., 2019
535	Fengtan	Liuchapo Fm	1.50299				607.1	Fang et al., 2019
535	Fengtan	Doushantuo Fm	1.13245				1525.5	Fang et al., 2019
535	Fengtan	Doushantuo Fm	1.48777				2056.4	Fang et al., 2019
535	Fengtan	Doushantuo Fm	2.76469				3506.55	Fang et al., 2019
535	Fengtan	Doushantuo Fm	0.587614				2930.7	Fang et al., 2019
535	Fengtan	Doushantuo Fm	2.64792				3767.1	Fang et al., 2019
535	Fengtan	Doushantuo Fm	0.0660094				1028.65	Fang et al., 2019
535	Fengtan	Doushantuo Fm	0.0526381				17.05	Fang et al., 2019
535	Fengtan	Doushantuo Fm	0.0846359				141.65	Fang et al., 2019
535	Fengtan	Doushantuo Fm	0.0618375				42.4	Fang et al., 2019
535	Fengtan	Doushantuo Fm	0.421391				200.5	Fang et al., 2019
535	Fengtan	Doushantuo Fm	0.0426949				778.8	Fang et al., 2019
535	Fengtan	Doushantuo Fm	0.169539				53.5	Fang et al., 2019
535	Fengtan	Doushantuo Fm	0.0695122				401.8	Fang et al., 2019
535	Fengtan	Doushantuo Fm	0.388855				3591.55	Fang et al., 2019
535	Fengtan	Doushantuo Fm	0.129333				609.8	Fang et al., 2019
535	Fengtan	Doushantuo Fm	0.0582503				333.6	Fang et al., 2019
535	Fengtan	Doushantuo Fm	0.0705332				278.65	Fang et al., 2019
535	Fengtan	Doushantuo Fm	0.902132				127.35	Fang et al., 2019
535	Fengtan	Doushantuo Fm	1.16416				682.7	Fang et al., 2019
535	Fengtan	Doushantuo Fm	1.21242				139.75	Fang et al., 2019
535	Fengtan	Doushantuo Fm	0.866596				54.2	Fang et al., 2019
535	Fengtan	Doushantuo Fm	2.56096				190.9	Fang et al., 2019
535	Fengtan	Doushantuo Fm	3.44643				17.1	Fang et al., 2019
535	Fengtan	Doushantuo Fm	2.94374				17.5	Fang et al., 2019
535	Fengtan	Doushantuo Fm	0.643526				333	Fang et al., 2019
535	Fengtan	Doushantuo Fm	0.577661				305.7	Fang et al., 2019
535	Fengtan	Doushantuo Fm	0.25988				137.4	Fang et al., 2019
535	Fengtan	Doushantuo Fm	0.414754				242.35	Fang et al., 2019
535	Fengtan	Doushantuo Fm	1.76725				185.2	Fang et al., 2019
535	Fengtan	Doushantuo Fm	0.491154				63.2	Fang et al., 2019
535	Fengtan	Doushantuo Fm	0.132343				69.25	Fang et al., 2019
535	Fengtan	Doushantuo Fm	0.137858				108.05	Fang et al., 2019
535	Fengtan	Doushantuo Fm	0.144992				51.9	Fang et al., 2019
535	Fengtan	Doushantuo Fm	1.10062				147.6	Fang et al., 2019
535	Fengtan	Doushantuo Fm	0.190455				35.8	Fang et al., 2019
535	Fengtan	Doushantuo Fm	2.22766				56.85	Fang et al., 2019
535	Fengtan	Doushantuo Fm	1.615				109.8	Fang et al., 2019
535	Fengtan	Doushantuo Fm	0.158418				120.75	Fang et al., 2019
535	Fengtan	Doushantuo Fm	0.579003				654.6	Fang et al., 2019
535	Fengtan	Doushantuo Fm	0.48161				648.25	Fang et al., 2019
535	Fengtan	Doushantuo Fm	0.232255				463.05	Fang et al., 2019
535	Fengtan	Doushantuo Fm	2.98109				731.6	Fang et al., 2019
535	Fengtan	Doushantuo Fm	2.73663				1018.3	Fang et al., 2019
535	Fengtan	Doushantuo Fm	2.69914				386.7	Fang et al., 2019
535	Fengtan	Doushantuo Fm	2.6361				340.35	Fang et al., 2019
535	Fengtan	Doushantuo Fm	1.97067				520.7	Fang et al., 2019
535	Fengtan	Doushantuo Fm	1.25365				809.35	Fang et al., 2019
535	Fengtan	Doushantuo Fm	0.0243067				297.2	Fang et al., 2019
555	Maoshi, South China	DST-IV		6.62		510.3	3.62641	Och et al., 2016
555	Maoshi	DST-IV		6.93		739.3	208.9	Och et al., 2016
555	Maoshi	DST-IV		6.89		811.7	284.361	Och et al., 2016
555	Maoshi	DST-IV		6.8		864	343.55	Och et al., 2016
555	Maoshi	DST-IV		7.12		874.6	329.658	Och et al., 2016
555	Maoshi	DST-IV		6.51		872.7	374.445	Och et al., 2016
555	Maoshi	DST-IV		6.75		929.8	413.177	Och et al., 2016
555	Maoshi	DST-IV		6.66		967.9	458.165	Och et al., 2016
555	Maoshi	DST-IV		6.61		804	298.092	Och et al., 2016
555	Maoshi	DST-IV		6.76		800.3	282.911	Och et al., 2016
555	Maoshi	DST-IV		6.65		738.6	229.63	Och et al., 2016
555	Maoshi	DST-IV		5.59		640.4	212.559	Och et al., 2016
555	Maoshi	DST-IV		6.41		720.4	229.799	Och et al., 2016
600	Jiulongwan, South China	DST-II			1.57	91.91	0	Och et al., 2016
600	Jiulongwan	DST-II			0.48	60.16	31.6343	Och et al., 2016
600	Jiulongwan	DST-II			2	440.56	321.703	Och et al., 2016
600	Jiulongwan	DST-II			1.84	288.89	179.541	Och et al., 2016
600	Jiulongwan	DST-II			1.03	148.6	87.3886	Och et al., 2016
600	Jiulongwan	DST-II			0.54	398.19	366.099	Och et al., 2016
600	Jiulongwan	DST-II			1.38	242.42	160.409	Och et al., 2016
600	Jiulongwan	DST-II			1.35	245.05	164.821	Och et al., 2016
600	Jiulongwan	DST-II			0.24	78.74	64.4771	Och et al., 2016
600	Jiulongwan	DST-II			1.63	247.68	150.811	Och et al., 2016
600	Jiulongwan	DST-II			0.19	195.6	184.309	Och et al., 2016
600	Jiulongwan	DST-II			1.88	358.46	246.734	Och et al., 2016
600	Jiulongwan	DST-II			0.92	919.52	864.846	Och et al., 2016
600	Jiulongwan	DST-II			0.46	1074.87	1047.53	Och et al., 2016
600	Jiulongwan	DST-II			1.14	718.63	650.881	Och et al., 2016
600	Jiulongwan	DST-II			0.57	521.11	487.236	Och et al., 2016
600	Jiulongwan	DST-II			1.6	568.05	472.964	Och et al., 2016
600	Jiulongwan	DST-II			0.94	762.66	706.797	Och et al., 2016
600	Jiulongwan	DST-II			0.74	326.13	282.153	Och et al., 2016
600	Jiulongwan	DST-II			0.19	253.62	242.329	Och et al., 2016
600	Jiulongwan	DST-II			0.64	347.42	309.386	Och et al., 2016
600	Jiulongwan	DST-II			0.6	99.4	63.7429	Och et al., 2016
600	Jiulongwan	DST-II			0.21	118.11	105.63	Och et al., 2016
600	Jiulongwan	DST-II			0.4	122.76	98.9886	Och et al., 2016
600	Jiulongwan	DST-II			0.65	91.46	52.8314	Och et al., 2016
600	Jiulongwan	DST-II			1	106.11	46.6814	Och et al., 2016
600	Jiulongwan	DST-II			1.66	307.19	208.539	Och et al., 2016
600	Jiulongwan	DST-II			1.59	183.55	89.0586	Och et al., 2016
600	Jiulongwan	DST-II			1.37	166.04	84.6229	Och et al., 2016
555	Jiulongwan	Miaohe			21.12	415.58	0	Och et al., 2016
555	Jiulongwan	Miaohe			1.79	4289.68	4183.3	Och et al., 2016
555	Jiulongwan	Miaohe			0.75	135.22	90.6486	Och et al., 2016
555	Jiulongwan	Miaohe			10.2	3158.89	2552.72	Och et al., 2016
555	Jiulongwan	Miaohe			13.18	4620.03	3836.76	Och et al., 2016
555	Jiulongwan	Miaohe			13.25	1033.65	246.221	Och et al., 2016
555	Jiulongwan	Miaohe			12.59	4782.23	4034.02	Och et al., 2016
555	Jiulongwan	Miaohe			10.56	4441.52	3813.95	Och et al., 2016
555	Jiulongwan	Miaohe			13.5	4084.43	3282.14	Och et al., 2016
555	Jiulongwan	Miaohe			13.82	4651.35	3830.05	Och et al., 2016
555	Jiulongwan	Miaohe			6.02	3630.46	3272.7	Och et al., 2016
555	Jiulongwan	Miaohe			15.74	773.62	0	Och et al., 2016
555	Jiulongwan	Miaohe			11.58	578.26	0	Och et al., 2016
555	Jiulongwan	Miaohe			13.42	4565.46	3767.93	Och et al., 2016
555	Jiulongwan	Miaohe			15.21	3873.91	2970	Och et al., 2016
555	Jiulongwan	Miaohe			11.81	4139.89	3438.04	Och et al., 2016
555	Jiulongwan	Miaohe			5.54	347.06	17.8257	Och et al., 2016
555	Jiulongwan	Miaohe			18.62	1368.16	261.6	Och et al., 2016
555	Jiulongwan	Miaohe			13.27	528.98	0	Och et al., 2016
555	Jiulongwan	Miaohe			15.59	470.53	0	Och et al., 2016
600	Jiuqunao	DST-II			2.5	168.33	19.7586	Och et al., 2016
600	Jiuqunao	DST-II			1.47	444.57	357.21	Och et al., 2016
600	Jiuqunao	DST-II			1.03	110.67	49.4586	Och et al., 2016
600	Jiuqunao	DST-II			0.89	113.71	60.8186	Och et al., 2016
555	Jiuqunao	Miaohe			1.94	459.25	343.959	Och et al., 2016
555	Jiuqunao	Miaohe			3.72	722.08	501.006	Och et al., 2016
555	Jiuqunao	Miaohe			4.11	2609.03	2364.78	Och et al., 2016
555	Jiuqunao	Miaohe			0.68	120.74	80.3286	Och et al., 2016
555	Jiuqunao	Miaohe			2.1	179.98	55.18	Och et al., 2016
555	Jiuqunao	Miaohe			1.86	164.28	53.7429	Och et al., 2016
555	Jiuqunao	Miaohe			1.66	200.41	101.759	Och et al., 2016
555	Jiuqunao	Miaohe			3.95	269.2	34.4571	Och et al., 2016
535	Jiuqunao	Yanjiahe Fm			0.58	139.2	104.731	Och et al., 2016
535	Jiuqunao	Yanjiahe Fm			0.6	141.81	106.153	Och et al., 2016
535	Jiuqunao	Yanjiahe Fm			7	634.61	218.61	Och et al., 2016
535	Jiuqunao	Yanjiahe Fm			3.8	391.51	165.681	Och et al., 2016
520	Jiuqunao	Shuijingtuo Fm			6.73	4723.87	4323.92	Och et al., 2016
520	Jiuqunao	Shuijingtuo Fm			5.94	792.67	439.664	Och et al., 2016
520	Jiuqunao	Shuijingtuo Fm			6.26	732.89	360.867	Och et al., 2016
520	Jiuqunao	Shuijingtuo Fm			4.31	630.95	374.813	Och et al., 2016
520	Jiuqunao	Shuijingtuo Fm			6.06	597.77	237.633	Och et al., 2016
520	Jiuqunao	Shuijingtuo Fm			6.22	692.33	322.684	Och et al., 2016
520	Jiuqunao	Shuijingtuo Fm			5.67	1139.85	802.89	Och et al., 2016
520	Jiuqunao	Shuijingtuo Fm			1.5	631.25	542.107	Och et al., 2016
535	Huanglian, South China	Yanjiahe Fm			1.04	175.26	113.454	Och et al., 2016
535	Huanglian, South China	Yanjiahe Fm			2.43	487.3	342.889	Och et al., 2016
535	Huanglian, South China	Yanjiahe Fm			2.23	1468.43	1335.9	Och et al., 2016
535	Huanglian, South China	Yanjiahe Fm						Och et al., 2016
535	Huanglian, South China	Yanjiahe Fm			1.15	210.73	142.387	Och et al., 2016
520	Huanglian, South China	Shuijingtuo Fm			3.28	352.96	158.034	Och et al., 2016
520	Huanglian, South China	Shuijingtuo Fm			0.84	209.75	159.83	Och et al., 2016
520	Huanglian, South China	Shuijingtuo Fm			6.53	2570.04	2181.97	Och et al., 2016
520	Huanglian, South China	Shuijingtuo Fm			5.51	382.18	54.7286	Och et al., 2016
555	Huanglian, South China	DST-IV		2.46		766.8	578.519	Och et al., 2016
555	Huanglian	DST-IV		8.31		1611.4	975.379	Och et al., 2016
535	Huanglian	Liuchapo	1.398	3.63		3519.4	3241.57	Och et al., 2016
535	Huanglian	Liuchapo	1.552	0.42		356.3	324.155	Och et al., 2016
535	Huanglian	Liuchapo	1.013	1.52		1436	1319.66	Och et al., 2016
535	Huanglian	Liuchapo	0.868	1.51		1070.8	955.229	Och et al., 2016
535	Huanglian	Liuchapo	0.834	1.02		541.9	463.832	Och et al., 2016
535	Huanglian	Liuchapo	1.873	0.43		293.7	260.789	Och et al., 2016
535	Huanglian	Liuchapo	2.623	0.15		384.7	373.219	Och et al., 2016
535	Huanglian	Liuchapo	1.419	0.14		209.4	198.685	Och et al., 2016
535	Huanglian	Liuchapo	1.467	0.13		290.2	280.25	Och et al., 2016
520	Huanglian	Niutitang	9.391	4.26		8336.2	8010.15	Och et al., 2016
520	Huanglian	Niutitang	9.563	5.38		13025.8	12614	Och et al., 2016
535	Longbizui, South China	Liuchapo	1.931	1.28		387	289.033	Och et al., 2016
535	Longbizui, South China	Liuchapo	0.815	1.95		503.74	354.493	Och et al., 2016
535	Longbizui, South China	Liuchapo	0.441	3.46		1279.89	1015.07	Och et al., 2016
535	Longbizui, South China	Liuchapo	0.721	2.66		2438.17	2234.58	Och et al., 2016
535	Longbizui, South China	Liuchapo	1.164	3.49		89.66	0	Och et al., 2016
535	Longbizui, South China	Liuchapo	3.119	3.56		1315.64	1043.17	Och et al., 2016
535	Longbizui, South China	Liuchapo	0.269	2.92		809.38	585.893	Och et al., 2016
535	Longbizui, South China	Liuchapo	1.624	0.84		467.74	403.449	Och et al., 2016
535	Longbizui, South China	Liuchapo	1.783	0.17		392.34	379.329	Och et al., 2016
520	Longbizui, South China	Liuchapo	3.5	1.18		2269.18	2178.87	Och et al., 2016
520	Longbizui, South China	Niutitang	5.58	0.89		1982	1913.88	Och et al., 2016
520	Longbizui, South China	Niutitang	1.579	4.24		209.11	0	Och et al., 2016
520	Longbizui, South China	Niutitang	7.738	7.3		79.84	0	Och et al., 2016
520	Longbizui, South China	Niutitang	6.89	4.39		107.44	0	Och et al., 2016
520	Longbizui, South China	Niutitang	7.094	3.51		65.24	0	Och et al., 2016
520	Longbizui, South China	Niutitang	5.524	5.52		31.09	0	Och et al., 2016
520	Longbizui, South China	Niutitang	4.798	5.84		179.68	0	Och et al., 2016
645	Shennongjia, South China	Datangpo		7.58118		1096.07	515.831	Zheng et al., 2019
645	Shennongjia, South China	Datangpo		7.13647		1008.23	462.027	Zheng et al., 2019
645	Shennongjia, South China	Datangpo		8.42824		1238.6	593.53	Zheng et al., 2019
645	Shennongjia, South China	Datangpo		6.42706		986.47	494.564	Zheng et al., 2019
645	Shennongjia, South China	Datangpo		12.3459		2491.94	1547.03	Zheng et al., 2019
645	Shennongjia, South China	Datangpo		11.2765		1862.93	999.865	Zheng et al., 2019
645	Shennongjia, South China	Datangpo		7.39059		1740.25	1174.6	Zheng et al., 2019
645	Shennongjia, South China	Datangpo		7.24765		1863.16	1308.45	Zheng et al., 2019
645	Shennongjia, South China	Datangpo		6.90353		2369.86	1841.49	Zheng et al., 2019
645	Shennongjia, South China	Datangpo		7.23706		2154.49	1600.59	Zheng et al., 2019
645	Shennongjia, South China	Datangpo		7.32176		2074.46	1514.08	Zheng et al., 2019
645	Shennongjia, South China	Datangpo		8.15824		3115.7	2491.29	Zheng et al., 2019
645	Xiaochayuan, South China	Datangpo		12.5524		822	0	Zhao et al., 2019
645	Xiaochayuan, South China	Datangpo		9.37059		345	0	Zhao et al., 2019
645	Xiaochayuan, South China	Datangpo		8.83059		901	225.135	Zhao et al., 2019
645	Xiaochayuan, South China	Datangpo		1.76294		348	213.07	Zhao et al., 2019
645	Xiaochayuan, South China	Datangpo		8.59765		898	239.964	Zhao et al., 2019
645	Xiaochayuan, South China	Datangpo		8.29059		678	43.4649	Zhao et al., 2019
645	Xiaochayuan, South China	Datangpo		2.99118		439	210.065	Zhao et al., 2019
645	Xiaochayuan, South China	Datangpo		3.31941		553	298.943	Zhao et al., 2019
645	Xiaochayuan, South China	Datangpo		5.79706		362	0	Zhao et al., 2019
645	Xiaochayuan, South China	Datangpo		12.0071		206	0	Zhao et al., 2019
645	Xiaochayuan, South China	Datangpo		7.85647		677	75.6909	Zhao et al., 2019
645	Xiaochayuan, South China	Datangpo		9.04765		1055	362.522	Zhao et al., 2019
645	Xiaochayuan, South China	Datangpo		8.91529		1070	387.652	Zhao et al., 2019
645	Xiaochayuan, South China	Datangpo		8.57118		848	191.99	Zhao et al., 2019
645	Xiaochayuan, South China	Datangpo		8.37		880	239.387	Zhao et al., 2019
645	Xiaochayuan, South China	Datangpo		9.20118		909	204.771	Zhao et al., 2019
645	Xiaochayuan, South China	Datangpo		8.47059		821	172.688	Zhao et al., 2019
645	Xiaochayuan, South China	Datangpo		1.20176		323	231.021	Zhao et al., 2019
525	North Tarim	Xiaoerbulake			7.14	26488	26055.4	Yu et al., 2009
525	North Tarim	Xiaoerbulake			8.25	3730	3230.19	Yu et al., 2009
525	North Tarim	Xiaoerbulake			1.34	6335	6253.82	Yu et al., 2009
525	North Tarim	Xiaoerbulake			6.04	885	519.082	Yu et al., 2009
525	North Tarim	Xiaoerbulake			4.93	652	353.328	Yu et al., 2009
525	North Tarim	Xiaoerbulake			4.39	905	639.043	Yu et al., 2009
525	North Tarim	Xiaoerbulake			3.78	901	671.998	Yu et al., 2009
525	North Tarim	Xiaoerbulake			2.05	536	411.806	Yu et al., 2009
525	North Tarim	Xiaoerbulake			2.29	378	239.266	Yu et al., 2009
525	North Tarim	Xiaoerbulake			2.48	380	229.755	Yu et al., 2009
525	North Tarim	Xiaoerbulake			2.48	484	333.755	Yu et al., 2009
525	North Tarim	Xiaoerbulake			2.58	474	317.697	Yu et al., 2009
525	North Tarim	Xiaoerbulake			0.31	15695	15676.2	Yu et al., 2009
525	North Tarim	Xiaoerbulake			0.36	2261	2239.19	Yu et al., 2009
525	North Tarim	Xiaoerbulake			1.73	12383	12278.2	Yu et al., 2009
525	North Tarim	Xiaoerbulake			0.33	313	293.008	Yu et al., 2009
525	North Tarim	Xiaoerbulake			0.96	196	137.841	Yu et al., 2009
525	North Tarim	Xiaoerbulake			0.48	822	792.92	Yu et al., 2009
525	North Tarim	Sugaitebulake			5.13	10059	9748.21	Yu et al., 2009
525	North Tarim	Sugaitebulake			3.2	3355	3161.14	Yu et al., 2009
525	North Tarim	Sugaitebulake			2.46	2407	2257.97	Yu et al., 2009
525	North Tarim	Sugaitebulake			3.66	2512	2290.27	Yu et al., 2009
525	North Tarim	Sugaitebulake			3.11	519	330.588	Yu et al., 2009
525	North Tarim	Sugaitebulake			2.72	602	437.216	Yu et al., 2009
525	North Tarim	Sugaitebulake			1.94	479	361.47	Yu et al., 2009
525	North Tarim	Sugaitebulake			1.45	305	217.155	Yu et al., 2009
525	North Tarim	Sugaitebulake			1.59	253	156.674	Yu et al., 2009
525	North Tarim	Sugaitebulake			1.36	211	128.608	Yu et al., 2009
525	North Tarim	Sugaitebulake			0.224	5985	5971.43	Yu et al., 2009
525	North Tarim	Sugaitebulake			0.768	5369	5322.47	Yu et al., 2009
525	North Tarim	Sugaitebulake			0.69	5925	5883.2	Yu et al., 2009
525	North Tarim	Sugaitebulake			0.428	2691	2665.07	Yu et al., 2009
525	North Tarim	Yuertusi Fm.	0.0420486	0.3233		10000	9975.25	Deng et al., 2021
525	North Tarim	Yuertusi Fm.	0.0607421	0.1325		10000	9989.86	Deng et al., 2021
525	North Tarim	Yuertusi Fm.	0.0395578	0.0318		79.6	77.1653	Deng et al., 2021
525	North Tarim	Yuertusi Fm.	0.0332523	0.3233		7060	7035.25	Deng et al., 2021
525	North Tarim	Yuertusi Fm.	1.02903	0.2332		10000	9982.15	Deng et al., 2021
525	North Tarim	Yuertusi Fm.	0.148154	0.2385		429	410.739	Deng et al., 2021
525	North Tarim	Yuertusi Fm.	0.192678	0.2756		10000	9978.9	Deng et al., 2021
525	North Tarim	Yuertusi Fm.	0.672197	0.5406		10000	9958.61	Deng et al., 2021
525	North Tarim	Yuertusi Fm.	0.68793	0.1961		4340	4324.99	Deng et al., 2021
525	North Tarim	Yuertusi Fm.	1.68014	0.2173		2410	2393.36	Deng et al., 2021
525	North Tarim	Yuertusi Fm.	1.87838	0.1696		10000	9987.01	Deng et al., 2021
525	North Tarim	Yuertusi Fm.	11.4545	1.6006		320	197.451	Deng et al., 2021
525	North Tarim	Yuertusi Fm.	8.32573	0.8109		619	556.914	Deng et al., 2021
525	North Tarim	Yuertusi Fm.	11.0802	1.4628		126.5	14.5016	Deng et al., 2021
525	North Tarim	Yuertusi Fm.	3.45483	1.2561		151	54.8274	Deng et al., 2021
525	North Tarim	Yuertusi Fm.	4.68782	1.7861		330	193.248	Deng et al., 2021
525	North Tarim	Yuertusi Fm.	0.638266	2.3744		242	60.2054	Deng et al., 2021
525	Northeast Tarim	Xishanbulake Fm.	0.417	2.8037		590	375.336	Deng et al., 2021
525	Northeast Tarim	Xishanbulake Fm.	0.573	7.42		1005	436.892	Deng et al., 2021
525	Northeast Tarim	Xishanbulake Fm.	0.079	1.9451		901	752.075	Deng et al., 2021
525	Northeast Tarim	Xishanbulake Fm.	0.747	2.2896		2930	2754.7	Deng et al., 2021
525	Northeast Tarim	Xishanbulake Fm.	0.243	2.1412		953	789.06	Deng et al., 2021
525	Northeast Tarim	Xishanbulake Fm.	0.292	3.9379		10000	9698.5	Deng et al., 2021
525	Northeast Tarim	Xishanbulake Fm.	0.142	2.7719		10000	9787.77	Deng et al., 2021
525	Northeast Tarim	Xishanbulake Fm.	0.223	3.1111		1035	796.8	Deng et al., 2021
525	Northeast Tarim	Xishanbulake Fm.	0.445	3.4662		1055	789.612	Deng et al., 2021
525	Northeast Tarim	Xidashan Fm.	0.192	1.4946		809	694.567	Deng et al., 2021
525	Northeast Tarim	Xidashan Fm.	0.812	1.0812		279	196.219	Deng et al., 2021
525	Northeast Tarim	Xidashan Fm.	0.25	1.2826		460	361.798	Deng et al., 2021
525	Northeast Tarim	Xidashan Fm.	0.357	2.6023		744	544.756	Deng et al., 2021
525	Northeast Tarim	Xidashan Fm.	0.573	1.4575		403	291.407	Deng et al., 2021
525	Northeast Tarim	Xidashan Fm.	1.18	3.3549		1635	1378.13	Deng et al., 2021
525	Northeast Tarim	Xidashan Fm.	0.318	1.3462		622	518.929	Deng et al., 2021
525	Northeast Tarim	Xidashan Fm.	1.031	1.5635		886	766.292	Deng et al., 2021
525	Northeast Tarim	Xidashan Fm.	0.573	1.3674		1340	1235.31	Deng et al., 2021
525	Northeast Tarim	Xidashan Fm.	0.778	2.4539		802	614.119	Deng et al., 2021
525	Northeast Tarim	Xidashan Fm.	1.21	2.332		833	654.452	Deng et al., 2021
525	Northeast Tarim	Xidashan Fm.	0.675	2.4592		626	437.713	Deng et al., 2021
525	Northeast Tarim	Xidashan Fm.	0.59	1.7225		445	313.118	Deng et al., 2021
525	Northeast Tarim	Xidashan Fm.	0.904	2.067		713	554.741	Deng et al., 2021
525	Northeast Tarim	Xidashan Fm.	0.563	2.8567		754	535.278	Deng et al., 2021
525	Northeast Tarim	Xidashan Fm.	0.424	1.643		581	455.205	Deng et al., 2021
525	Northeast Tarim	Xidashan Fm.	1.07	2.6235		920	719.133	Deng et al., 2021
525	Northeast Tarim	Xidashan Fm.	0.814	2.2843		842	667.104	Deng et al., 2021
525	Northeast Tarim	Xidashan Fm.	0.334	3.1853		722	478.119	Deng et al., 2021
525	Northeast Tarim	Xidashan Fm.	0.607	2.0988		944	783.307	Deng et al., 2021
525	Northeast Tarim	Xidashan Fm.	0.27	1.3462		1280	1176.93	Deng et al., 2021
525	Northeast Tarim	Xidashan Fm.	0.324	0.7738		839	779.754	Deng et al., 2021
525	Northeast Tarim	Xidashan Fm.	0.862	0.9646		1185	1111.15	Deng et al., 2021
525	Northeast Tarim	Xidashan Fm.	1.42	3.8531		1185	889.99	Deng et al., 2021
525	Northeast Tarim	Xidashan Fm.	0.489	1.3992		785	677.871	Deng et al., 2021
525	Northwest Tarim	Yuertusi Fm.	2.19	2.8779		18900	18679.7	Zhang et al., 2020
525	Northwest Tarim	Yuertusi Fm.	6.24	4.6905		14500	14140.9	Zhang et al., 2020
525	Northwest Tarim	Yuertusi Fm.	1.61	4.2665		12450	12123.3	Zhang et al., 2020
525	Northwest Tarim	Yuertusi Fm.		4.1181		3010	2694.7	Zhang et al., 2020
525	Northwest Tarim	Yuertusi Fm.	9.87	3.3231		1500	1245.57	Zhang et al., 2020
525	Northwest Tarim	Yuertusi Fm.	8.54	2.9468		11900	11674.4	Zhang et al., 2020
525	Northwest Tarim	Yuertusi Fm.	3.18	2.332		6690	6511.45	Zhang et al., 2020
525	Northwest Tarim	Yuertusi Fm.	4.18	1.6801		1270	1141.36	Zhang et al., 2020
525	Northwest Tarim	Yuertusi Fm.	6.77	1.3833		615	509.088	Zhang et al., 2020
525	Northwest Tarim	Yuertusi Fm.	9.35	1.1501		399	310.943	Zhang et al., 2020
525	Northwest Tarim	Yuertusi Fm.	7.37	0.6148		1675	1627.93	Zhang et al., 2020
525	Northwest Tarim	Yuertusi Fm.	4.01	1.6854		281	151.958	Zhang et al., 2020
525	Northwest Tarim	Yuertusi Fm.	3.58	1.2349		420	325.451	Zhang et al., 2020
525	Northwest Tarim	Yuertusi Fm.	5.01	2.3585		459	278.423	Zhang et al., 2020
525	Northwest Tarim	Yuertusi Fm.	7.22	1.855		172	29.973	Zhang et al., 2020
525	Northwest Tarim	Yuertusi Fm.	3.77	6.519		503	3.87656	Zhang et al., 2020
525	Northwest Tarim	Yuertusi Fm.	4.7	5.5915		78500	78071.9	Zhang et al., 2020
525	Northwest Tarim	Yuertusi Fm.	5.59	5.7028		81800	81363.4	Zhang et al., 2020
525	Northwest Tarim	Yuertusi Fm.	3.3	6.6674		74100	73589.5	Zhang et al., 2020
525	Northwest Tarim	Yuertusi Fm.	4.11	7.102		37600	37056.2	Zhang et al., 2020
525	Northwest Tarim	Yuertusi Fm.	1.4	8.5277		320	0	Zhang et al., 2020
525	Northwest Tarim	Yuertusi Fm.	0.53	8.4694		400	0	Zhang et al., 2020
525	Northwest Tarim	Yuertusi Fm.	0.94	8.3634		438	0	Zhang et al., 2020
525	Northwest Tarim	Yuertusi Fm.	0.89	8.4482		570	0	Zhang et al., 2020
525	Northwest Tarim	Yuertusi Fm.	0.88	8.7927		290	0	Zhang et al., 2020
525	Northwest Tarim	Yuertusi Fm.	1.66	8.321		745	107.907	Zhang et al., 2020
525	Northwest Tarim	Yuertusi Fm.	1.14	6.5879		277	0	Zhang et al., 2020
525	Northwest Tarim	Yuertusi Fm.	1.73	6.3706		250	0	Zhang et al., 2020
525	Northwest Tarim	Yuertusi Fm.	4.52	9.2538		22100	21391.5	Zhang et al., 2020
525	Northwest Tarim	Yuertusi Fm.	3.2	9.1213		12100	11401.6	Zhang et al., 2020
525	Northwest Tarim	Yuertusi Fm.	1.63	10.176		280	0	Zhang et al., 2020
525	Northwest Tarim	Yuertusi Fm.	2.64	9.6884		300	0	Zhang et al., 2020
525	Northwest Tarim	Yuertusi Fm.	0.62	8.3316		311	0	Zhang et al., 2020
525	Northwest Tarim	Yuertusi Fm.	1.25	10.335		515	0	Zhang et al., 2020
560	Amadeus Basin, Australia	Julie Formation	1.06	2.28		519	344.433	Schmid et al., 2017
560	Amadeus Basin, Australia	Julie Formation	4.26	2.45		2148	1960.42	Schmid et al., 2017
560	Amadeus Basin, Australia	Pertatataka Formation	1.61	5.25		175	0	Schmid et al., 2017
560	Amadeus Basin, Australia	Pertatataka Formation	1.32	5.11		503	111.756	Schmid et al., 2017
560	Amadeus Basin, Australia	Johnnys Creek Formation	7.72	2.72		2216	2007.74	Schmid et al., 2017
560	Amadeus Basin, Australia	Johnnys Creek Formation	9.7	1.78		3405	3268.72	Schmid et al., 2017
560	Amadeus Basin, Australia	Johnnys Creek Formation	12.05	0.22		639	622.156	Schmid et al., 2017
560	Amadeus Basin, Australia	Johnnys Creek Formation	12.48	0.14		352	341.281	Schmid et al., 2017
560	Amadeus Basin, Australia	Johnnys Creek Formation	4.97	1.24		1321	1226.06	Schmid et al., 2017
560	Amadeus Basin, Australia	Johnnys Creek Formation	4.39	5.14		766	372.459	Schmid et al., 2017
560	Amadeus Basin, Australia	Johnnys Creek Formation	4.42	5.15		2291	1896.69	Schmid et al., 2017
590	Amadeus Basin, Australia	Pertatataka Formation	0.17	6.92		351	0	Schmid et al., 2017
590	Amadeus Basin, Australia	Pertatataka Formation	0.13	7.74		295	0	Schmid et al., 2017
590	Amadeus Basin, Australia	Pertatataka Formation	0.26	7.17		385	0	Schmid et al., 2017
590	Amadeus Basin, Australia	Pertatataka Formation	0.19	7.08		353	0	Schmid et al., 2017
590	Amadeus Basin, Australia	Pertatataka Formation	0.25	7.06		394	0	Schmid et al., 2017
590	Amadeus Basin, Australia	Pertatataka Formation	0.25	6.89		499	0	Schmid et al., 2017
590	Amadeus Basin, Australia	Pertatataka Formation	0.28	6.57		432	0	Schmid et al., 2017
590	Amadeus Basin, Australia	Pertatataka Formation	0.26	6.76		306	0	Schmid et al., 2017
590	Amadeus Basin, Australia	Pertatataka Formation	0.35	6.71		258	0	Schmid et al., 2017
590	Amadeus Basin, Australia	Pertatataka Formation	0.4	6.81		313	0	Schmid et al., 2017
590	Amadeus Basin, Australia	Pertatataka Formation	0.48	7.58		455	0	Schmid et al., 2017
590	Amadeus Basin, Australia	Pertatataka Formation	0.66	7.9		465	0	Schmid et al., 2017
590	Amadeus Basin, Australia	Pertatataka Formation	0.97	7.11		376	0	Schmid et al., 2017
590	Amadeus Basin, Australia	Pertatataka Formation	0.75	7.82		404	0	Schmid et al., 2017
590	Amadeus Basin, Australia	Pertatataka Formation	1.02	7.2		460	0	Schmid et al., 2017
590	Amadeus Basin, Australia	Pertatataka Formation	0.68	7.66		712	125.517	Schmid et al., 2017
590	Amadeus Basin, Australia	Pertatataka Formation	2	7.14		439	0	Schmid et al., 2017
590	Amadeus Basin, Australia	Pertatataka Formation	2.1	6.66		453	0	Schmid et al., 2017
590	Amadeus Basin, Australia	Pertatataka Formation	1.88	6.32		428	0	Schmid et al., 2017
590	Amadeus Basin, Australia	Pertatataka Formation	2.11	6.28		353	0	Schmid et al., 2017
590	Amadeus Basin, Australia	Pertatataka Formation	2.01	6.14		574	103.894	Schmid et al., 2017
590	Amadeus Basin, Australia	Pertatataka Formation	2.04	6.47		423	0	Schmid et al., 2017
590	Amadeus Basin, Australia	Pertatataka Formation	2.14	6.15		249	0	Schmid et al., 2017
590	Amadeus Basin, Australia	Pertatataka Formation	2.64	5.82		231	0	Schmid et al., 2017
590	Amadeus Basin, Australia	Pertatataka Formation	2.92	6.02		206	0	Schmid et al., 2017
590	Amadeus Basin, Australia	Pertatataka Formation	2.91	6.11		115	0	Schmid et al., 2017
590	Amadeus Basin, Australia	Pertatataka Formation	2.46	6.74		155	0	Schmid et al., 2017
590	Amadeus Basin, Australia	Pertatataka Formation	2.63	6.86		139	0	Schmid et al., 2017
650	Amadeus Basin, Australia	Olympic Formation	1.74	2.91		236	13.1975	Schmid et al., 2017
650	Amadeus Basin, Australia	Olympic Formation	0.18	0.48		263	226.249	Schmid et al., 2017
650	Amadeus Basin, Australia	Olympic Formation	0.26	0.43		430	397.077	Schmid et al., 2017
650	Amadeus Basin, Australia	Olympic Formation	0.6	0.42		82	49.8429	Schmid et al., 2017
650	Amadeus Basin, Australia	Olympic Formation	0.18	0.94		227	155.029	Schmid et al., 2017
650	Amadeus Basin, Australia	Aralka Formation	0.91	7.29		637	78.8454	Schmid et al., 2017
650	Amadeus Basin, Australia	Aralka Formation	1.46	7.26		263	0	Schmid et al., 2017
650	Amadeus Basin, Australia	Aralka Formation	0.26	6.8		450	0	Schmid et al., 2017
650	Amadeus Basin, Australia	Aralka Formation	2.57	2.1		686	525.215	Schmid et al., 2017
800	Amadeus Basin, Australia	Johnnys Creek Formation	7.88	0.39		300	270.14	Schmid et al., 2017
800	Amadeus Basin, Australia	Johnnys Creek Formation	4.07	3.31		491	237.572	Schmid et al., 2017
800	Amadeus Basin, Australia	Johnnys Creek Formation	6.27	1.63		196	71.2	Schmid et al., 2017
800	Amadeus Basin, Australia	Johnnys Creek Formation	4.82	2.16		297	131.621	Schmid et al., 2017
800	Amadeus Basin, Australia	Johnnys Creek Formation	6.1	2.52		378	185.058	Schmid et al., 2017
800	Amadeus Basin, Australia	Johnnys Creek Formation	1.92	5.31		698	291.443	Schmid et al., 2017
800	Amadeus Basin, Australia	Johnnys Creek Formation	4.85	3.06		60	0	Schmid et al., 2017
800	Amadeus Basin, Australia	Johnnys Creek Formation	3.36	4		69	0	Schmid et al., 2017
800	Amadeus Basin, Australia	Loves Creek Formation	7.09	2.52		202	9.05767	Schmid et al., 2017
800	Amadeus Basin, Australia	Loves Creek Formation	3.84	0.63		18	0	Schmid et al., 2017
800	Amadeus Basin, Australia	Loves Creek Formation	5.29	1.36		117	12.8724	Schmid et al., 2017
800	Amadeus Basin, Australia	Loves Creek Formation	9.39	0.74		130	73.3423	Schmid et al., 2017
800	Amadeus Basin, Australia	Loves Creek Formation	4.79	0.74		98	41.3423	Schmid et al., 2017
800	Amadeus Basin, Australia	Loves Creek Formation	6.98	0.8		108	46.7485	Schmid et al., 2017
800	Amadeus Basin, Australia	Loves Creek Formation	6.23	1.21		151	58.3571	Schmid et al., 2017
800	Amadeus Basin, Australia	Loves Creek Formation	5.67	0.61		73	26.2957	Schmid et al., 2017
800	Amadeus Basin, Australia	Loves Creek Formation	4.56	0.8		73	11.7485	Schmid et al., 2017
800	Amadeus Basin, Australia	Loves Creek Formation	3.03	1.69		73	0	Schmid et al., 2017
800	Amadeus Basin, Australia	Loves Creek Formation	2.28	1.8		91	0	Schmid et al., 2017
800	Amadeus Basin, Australia	Loves Creek Formation	2.16	1.03		39	0	Schmid et al., 2017
560	Amadeus Basin, Australia	Julie Formation	10.46	0.71		60	5.63926	Schmid et al., 2017
560	Amadeus Basin, Australia	Julie Formation	11.85	0.62		87	39.5301	Schmid et al., 2017
560	Amadeus Basin, Australia	Julie Formation	7.24	2.01		196	42.1055	Schmid et al., 2017
560	Amadeus Basin, Australia	Julie Formation	7.75	1.89		204	59.2933	Schmid et al., 2017
560	Amadeus Basin, Australia	Julie Formation	8.81	1.82		144	4.65276	Schmid et al., 2017
560	Amadeus Basin, Australia	Julie Formation	7.09	2.18		233	66.0896	Schmid et al., 2017
590	Amadeus Basin, Australia	Pertatataka Formation	2.7	3.18		263	19.5252	Schmid et al., 2017
590	Amadeus Basin, Australia	Pertatataka Formation	1.95	5.66		190	0	Schmid et al., 2017
590	Amadeus Basin, Australia	Pertatataka Formation	0.96	7.1		316	0	Schmid et al., 2017
590	Amadeus Basin, Australia	Pertatataka Formation	1.85	6.64		365	0	Schmid et al., 2017
590	Amadeus Basin, Australia	Pertatataka Formation	0.65	6.46		308	0	Schmid et al., 2017
590	Amadeus Basin, Australia	Pertatataka Formation	0.58	7.03		297	0	Schmid et al., 2017
590	Amadeus Basin, Australia	Pertatataka Formation	0.91	7.03		300	0	Schmid et al., 2017
590	Amadeus Basin, Australia	Pertatataka Formation	0.62	6.27		353	0	Schmid et al., 2017
590	Amadeus Basin, Australia	Pertatataka Formation	0.72	6.46		280	0	Schmid et al., 2017
590	Amadeus Basin, Australia	Pertatataka Formation	0.69	6.02		341	0	Schmid et al., 2017
590	Amadeus Basin, Australia	Pertatataka Formation	0.51	6.12		208	0	Schmid et al., 2017
590	Amadeus Basin, Australia	Pertatataka Formation	0.66	6.45		214	0	Schmid et al., 2017
590	Amadeus Basin, Australia	Pertatataka Formation	0.64	6.62		359	0	Schmid et al., 2017
590	Amadeus Basin, Australia	Pertatataka Formation	0.56	6.57		86	0	Schmid et al., 2017
590	Amadeus Basin, Australia	Pertatataka Formation	0.65	6.68		149	0	Schmid et al., 2017
590	Amadeus Basin, Australia	Pertatataka Formation	0.66	6.27		88	0	Schmid et al., 2017
590	Amadeus Basin, Australia	Pertatataka Formation	0.59	6.77		326	0	Schmid et al., 2017
590	Amadeus Basin, Australia	Pertatataka Formation	0.52	6.32		444	0	Schmid et al., 2017
590	Amadeus Basin, Australia	Pertatataka Formation	0.58	7.21		295	0	Schmid et al., 2017
590	Amadeus Basin, Australia	Pertatataka Formation	0.5	6.72		360	0	Schmid et al., 2017
590	Amadeus Basin, Australia	Pertatataka Formation	0.44	7.01		313	0	Schmid et al., 2017
590	Amadeus Basin, Australia	Pertatataka Formation	0.45	7.3		350	0	Schmid et al., 2017
590	Amadeus Basin, Australia	Pertatataka Formation	0.42	6.54		380	0	Schmid et al., 2017
590	Amadeus Basin, Australia	Pertatataka Formation	0.43	7.01		359	0	Schmid et al., 2017
590	Amadeus Basin, Australia	Pertatataka Formation	0.39	6.75		345	0	Schmid et al., 2017
590	Amadeus Basin, Australia	Pertatataka Formation	0.31	7.14		224	0	Schmid et al., 2017
590	Amadeus Basin, Australia	Pertatataka Formation	0.35	7.05		263	0	Schmid et al., 2017
590	Amadeus Basin, Australia	Pertatataka Formation	0.39	6.93		252	0	Schmid et al., 2017
590	Amadeus Basin, Australia	Pertatataka Formation	0.36	6.97		375	0	Schmid et al., 2017
590	Amadeus Basin, Australia	Pertatataka Formation	0.28	7.03		721	182.752	Schmid et al., 2017
590	Amadeus Basin, Australia	Pertatataka Formation	0.22	6.82		473	0	Schmid et al., 2017
650	Amadeus Basin, Australia	Olympic Formation	10.52	1.52		343	226.622	Schmid et al., 2017
650	Amadeus Basin, Australia	Olympic Formation	5.63	4.14		191	0	Schmid et al., 2017
650	Amadeus Basin, Australia	Olympic Formation	4.97	4.55		547	198.632	Schmid et al., 2017
650	Amadeus Basin, Australia	Aralka Formation	3.78	6.03		360	0	Schmid et al., 2017
650	Amadeus Basin, Australia	Aralka Formation	2.69	6.05		508	44.7853	Schmid et al., 2017
800	Amadeus Basin, Australia	Areyonga Formation	3.62	5.84		326	0	Schmid et al., 2017
800	Amadeus Basin, Australia	Areyonga Formation	0.86	3.45		554	289.853	Schmid et al., 2017
800	Amadeus Basin, Australia	Areyonga Formation	0.45	10.74		799	0	Schmid et al., 2017
800	Amadeus Basin, Australia	Johnnys Creek Formation	4.56	3.49		1678	1410.79	Schmid et al., 2017
800	Amadeus Basin, Australia	Johnnys Creek Formation	1.91	4.88		3220	2846.37	Schmid et al., 2017
800	Amadeus Basin, Australia	Johnnys Creek Formation	2.19	5.56		587	161.302	Schmid et al., 2017
800	Amadeus Basin, Australia	Johnnys Creek Formation	8.61	0.72		142	86.8736	Schmid et al., 2017
800	Amadeus Basin, Australia	Johnnys Creek Formation	6	3.22		379	132.463	Schmid et al., 2017
800	Amadeus Basin, Australia	Johnnys Creek Formation	6.26	3.17		361	118.291	Schmid et al., 2017
800	Amadeus Basin, Australia	Johnnys Creek Formation	2.53	5.18		1691	1294.4	Schmid et al., 2017
800	Amadeus Basin, Australia	Johnnys Creek Formation	2.13	5.84		386	0	Schmid et al., 2017
800	Amadeus Basin, Australia	Johnnys Creek Formation	0.96	6.49		380	0	Schmid et al., 2017
800	Amadeus Basin, Australia	Johnnys Creek Formation	4.26	3.6		327	51.3681	Schmid et al., 2017
800	Amadeus Basin, Australia	Johnnys Creek Formation	5.22	4.17		453	133.726	Schmid et al., 2017
800	Amadeus Basin, Australia	Johnnys Creek Formation	7.19	2.96		241	14.3693	Schmid et al., 2017
800	Amadeus Basin, Australia	Johnnys Creek Formation	5.45	4		390	83.7423	Schmid et al., 2017
800	Amadeus Basin, Australia	Johnnys Creek Formation	5.6	2.53		208	14.292	Schmid et al., 2017
800	Amadeus Basin, Australia	Johnnys Creek Formation	7.62	1.59		39	0	Schmid et al., 2017
800	Amadeus Basin, Australia	Johnnys Creek Formation	10.73	0.79		534	473.514	Schmid et al., 2017
800	Amadeus Basin, Australia	Johnnys Creek Formation	5.62	4.05		357	46.9141	Schmid et al., 2017
800	Amadeus Basin, Australia	Johnnys Creek Formation	6.33	3.26		458	208.4	Schmid et al., 2017
800	Amadeus Basin, Australia	Johnnys Creek Formation	5.88	3.8		284	0	Schmid et al., 2017
800	Amadeus Basin, Australia	Johnnys Creek Formation	7.74	2.57		636	439.229	Schmid et al., 2017
800	Amadeus Basin, Australia	Loves Creek Formation	9.94	1		384	307.436	Schmid et al., 2017
800	Amadeus Basin, Australia	Loves Creek Formation	7.15	2.48		134	0	Schmid et al., 2017
800	Amadeus Basin, Australia	Loves Creek Formation	10	0.76		234	175.811	Schmid et al., 2017
800	Amadeus Basin, Australia	Loves Creek Formation	9.35	0.73		229	173.108	Schmid et al., 2017
800	Amadeus Basin, Australia	Loves Creek Formation	9.42	0.84		72	7.68589	Schmid et al., 2017
800	Amadeus Basin, Australia	Loves Creek Formation	8.93	1.12		63	0	Schmid et al., 2017
800	Amadeus Basin, Australia	Loves Creek Formation	8.94	0.99		119	43.2012	Schmid et al., 2017
800	Amadeus Basin, Australia	Loves Creek Formation	0.32	0.71		235	180.639	Schmid et al., 2017
800	Amadeus Basin, Australia	Loves Creek Formation	6.74	0.82		50	0	Schmid et al., 2017
800	Amadeus Basin, Australia	Loves Creek Formation	8.45	1.09		45	0	Schmid et al., 2017
800	Amadeus Basin, Australia	Loves Creek Formation	6.73	1.61		52	0	Schmid et al., 2017
800	Amadeus Basin, Australia	Loves Creek Formation	6.99	1.53		50	0	Schmid et al., 2017
800	Amadeus Basin, Australia	Loves Creek Formation	8.07	1.5		74	0	Schmid et al., 2017
530	Central Iberian Zone, Spain			10.5523		846	38.0693	Ugidos et al., 2003
530	Central Iberian Zone, Spain			10.017		728	0	Ugidos et al., 2003
530	Central Iberian Zone, Spain			10.547		657	0	Ugidos et al., 2003
530	Central Iberian Zone, Spain			11.1565		815	0	Ugidos et al., 2003
530	Central Iberian Zone, Spain			10.5152		744	0	Ugidos et al., 2003
530	Central Iberian Zone, Spain			11.0558		669	0	Ugidos et al., 2003
560	Central Iberian Zone, Spain			10.4145		664	0	Ugidos et al., 2003
560	Central Iberian Zone, Spain			9.7149		632	0	Ugidos et al., 2003
560	Central Iberian Zone, Spain			10.3403		783	0	Ugidos et al., 2003
560	Central Iberian Zone, Spain			10.5788		824	14.0403	Ugidos et al., 2003
560	Central Iberian Zone, Spain			10.7961		804	0	Ugidos et al., 2003
560	Central Iberian Zone, Spain			9.9852		653	0	Ugidos et al., 2003
560	Central Iberian Zone, Spain			11.5222		867	0	Ugidos et al., 2003
560	Central Iberian Zone, Spain			10.5788		790	0	Ugidos et al., 2003
560	Central Iberian Zone, Spain			10.3615		705	0	Ugidos et al., 2003
560	Central Iberian Zone, Spain			11.236		642	0	Ugidos et al., 2003
Liu, K., Feng, Q., Shen, J., Khan, M. and Planavsky, N. J., 2018. Increased productivity as a primary driver of marine anoxia in the Lower Cambrian. Palaeogeography, Palaeoclimatology, Palaeoecology 491, 1-9.
Zhai, L., Wu, C., Ye, Y., Zhang, S. and Wang, Y., 2018. Fluctuations in chemical weathering on the Yangtze Block during the Ediacaran–Cambrian transition: Implications for paleoclimatic conditions and the marine carbon cycle. Palaeogeography, Palaeoclimatology, Palaeoecology 490, 280-292.
Guo, Q., Shields, G. A., Liu, C., Strauss, H., Zhu, M., Pi, D., Goldberg, T. and Yang, X., 2007. Trace element chemostratigraphy of two Ediacaran–Cambrian successions in South China: Implications for organosedimentary metal enrichment and silicification in the Early Cambrian. Palaeogeography, Palaeoclimatology, Palaeoecology 254, 194-216.
Guo, Q., Deng, Y., Hippler, D., Franz, G. and Zhang, J., 2016. REE and trace element patterns from organic-rich rocks of the Ediacaran–Cambrian transitional interval. Gondwana Research 36, 94-106.
Guan, C., Zhou, C., Wang, W., Wan, B., Yuan, X. and Chen, Z., 2014. Fluctuation of shelf basin redox conditions in the early Ediacaran: Evidence from Lantian Formation black shales in South China. Precambr. Res. 245, 1-12.
Fang, X., Wu, L., Geng, A. and Deng, Q., 2019. Formation and evolution of the Ediacaran to Lower Cambrian black shales in the Yangtze Platform, South China. Palaeogeography, Palaeoclimatology, Palaeoecology 527, 87-102.
Och, L. M., Cremonese, L., Shields-Zhou, G. A., Poulton, S. W., Struck, U., Ling, H., Li, D., Chen, X., Manning, C., Thirlwall, M., Strauss, H., Zhu, M. and Fairchild, I., 2016. Palaeoceanographic controls on spatial redox distribution over the Yangtze Platform during the Ediacaran-Cambrian transition. Sedimentology 63, 378-410.
Zheng, H., Song, H., Yang, Z., Tang, Y., Kuang, H., Liu, Y., 2019. Element geochemical characteristics of Datangpo Formation of Nanhua system in Shennongjia area of Hubei, China. Journal of Earth Sciences and Environment 41(3), 316-326. (in Chinese with English abstract)
Zhao, Z., Ling, Y., Li, H., Jiang, K., Li, J., Cai, K., Liao H., 2019. Geochemistry and significance of the Datangpo Formation in the Xiaochayuan manganese deposit in the Xiushan County, Chongqing. Bulletin of Mineralogy, Petrology and Geochemistry 38(2), 330-341.
Yu, B., Dong, H., Widom, E., Chen, J., Lin, C., 2009. Geochemistry of basal Cambrian black shales and cherts from the North Tarim Basin, Northwest China: Implications for depositional setting and tectonic history. Journal of Asian Earth Sciences 34, 418-436
Zhang, C., Guan, S., Wu, L., Ren, R., Wang, L., Wu, X., 2020. Depositional environments of early Cambrian marine shale, northwestern Tarim Basin, China: implications for organic matter accumulation. J. Petrol. Sci. Eng. 194, 107497
Deng, Q., Wang, H., Wei, Z., Li, S., Zhang, H., Liu, H., Faboya, O. L., Cheng, B., Liao, Z., 2021. Different accumulation mechanisms of organic matter in Cambrian sedimentary successions in the western and northeastern margins of the Tarim Basin, NW China. Journal of Asian Earth Sciences 207, 104660.
Ugidos, J. M., et al., 2003. The Upper Neoproterozoic–Lower Cambrian of the Central Iberian Zone, Spain: chemical and isotopic (Sm-Nd) evidence that the sedimentary succession records an inverted stratigraphy of its source. Geochimica et Cosmochimica Acta, 67(14), 2615-2629.
Schmid, S., Kunzmann, M., and Pagès, A., 2017. Inorganic geochemical evaluation of hydrocarbon source rock potential of Neoproterozoic strata in the Amadeus Basin, Australia. Marine and Petroleum Geology, 86, 1092-1105.

## Sheet: Permian-Triassic
Time bin (Ma)	Age (Ma)	Babio	Babio	Babio	References		Time bin (Ma)	Section	Substage	Ba	Babio	TOC	References
		min	mean	max						ppm	ppm	%
250	253	0	170.739	2743.15	Shen et al., 2015		250	Chaohu	Spathian	57.18	42.42	0.17	Wei et al., 2015
250	251.8	0	214.25	4873.55	Shen et al., 2015		250	Chaohu	Spathian	42.91	35.89	0.19	Wei et al., 2015
250	251.4	0	169.058	1720.32	Shen et al., 2015		250	Chaohu	Spathian	43.74	33.62	0.18	Wei et al., 2015
250	250.5	0	191.398	1333.55	Shen et al., 2015		250	Chaohu	Spathian	36.03	19.03	0.25	Wei et al., 2015
250	249	0	232.173	6860.33	Shen et al., 2015		250	Chaohu	Spathian	40.22	24.01	0.24	Wei et al., 2015
250	256	0	6.84003	90.1834	Shen et al., 2015		250	Chaohu	Spathian	37.1	37.13	0.23	Wei et al., 2015
250	253	0	27.6901	213.074	Shen et al., 2015		250	Chaohu	Spathian	31.95	17.77	0.22	Wei et al., 2015
250	251.8	0	53.501	870.621	Shen et al., 2015		250	Chaohu	Spathian	35.46	21.59	0.22	Wei et al., 2015
250	251.4	0	77.707	907.201	Shen et al., 2015		250	Chaohu	Spathian	33.05	20.5	0.28	Wei et al., 2015
250	250.5	0	85.9382	892.108	Shen et al., 2015		250	Chaohu	Spathian	49.65	46.16	0.21	Wei et al., 2015
250	253	0	292.284	1458.81	Shen et al., 2015		250	Chaohu	Spathian	52.52	40.06	0.32	Wei et al., 2015
250	251.8	0	61.54	348.814	Shen et al., 2015		250	Chaohu	Spathian	36.84	26.47	0.24	Wei et al., 2015
250	256	202.352	500.315	1787.21	Shen et al., 2015		250	Chaohu	Spathian	35.83	28.61	0.3	Wei et al., 2015
250	253	210.428	406.489	668.33	Shen et al., 2015		250	Chaohu	Spathian	40.44	34.03	0.24	Wei et al., 2015
250	251.8	159.136	272.145	495.523	Shen et al., 2015		250	Chaohu	Spathian	47.35	39.21	0.36	Wei et al., 2015
250	253	64.1789	190.146	450.254	Shen et al., 2015		250	Chaohu	Spathian	45.87	36.65	0.32	Wei et al., 2015
250	251.8	0	198.694	1746.51	Shen et al., 2015		250	Chaohu	Spathian	42	29.7	0.37	Wei et al., 2015
250	256	55.4352	37.6263	253.27	Shen et al., 2015		250	Chaohu	Spathian	53.66	39.86	0.26	Wei et al., 2015
250	253	87.2141	46.1181	734.743	Shen et al., 2015		250	Chaohu	Spathian	35.02	22.69	0.24	Wei et al., 2015
250	251.8	63.5736	86.3478	336.166	Shen et al., 2015		250	Chaohu	Spathian	40.74	24.79	0.34	Wei et al., 2015
250	256	0	204.289	396.189	Shen et al., 2015		250	Chaohu	Spathian	36.28	30.63	0.28	Wei et al., 2015
250	251.8	0	1326.91	8157.82	Shen et al., 2015		250	Chaohu	Spathian	39.29	25.04	0.33	Wei et al., 2015
250	251.4	0	290.256	1094.99	Shen et al., 2015		250	Chaohu	Spathian	47.46	17.85	0.35	Wei et al., 2015
250	250.5	0	852.144	8169.95	Shen et al., 2015		250	Chaohu	Spathian	35.14	26.39	0.22	Wei et al., 2015
250	249	0	124.328	331.705	Shen et al., 2015		250	Chaohu	Spathian	55.87	46.27	0.2	Wei et al., 2015
250	256	0	99.7647	156.994	Shen et al., 2015		250	Chaohu	Spathian	48.79	32.97	0.15	Wei et al., 2015
250	253	0	156.591	722.074	Shen et al., 2015		250	Chaohu	Spathian	28.36	16.45	0.2	Wei et al., 2015
250	251.8	0	481.677	8793.81	Shen et al., 2015		250	Chaohu	Spathian	54.48	43.87	0.24	Wei et al., 2015
250	251.4	0	228.103	1914.65	Shen et al., 2015		250	Chaohu	Spathian	54.56	37.7	0.26	Wei et al., 2015
250	253	1	65.601	389.986	Shen et al., 2015		250	Chaohu	Spathian	42.16	29.54	0.21	Wei et al., 2015
250	251.8	1	136.124	262.356	Shen et al., 2015		250	Chaohu	Spathian	51.5	24.01	0.27	Wei et al., 2015
250	253	18.0977	35.6752	96.2395	Shen et al., 2015		250	Chaohu	Spathian	40.37	23.54	0.26	Wei et al., 2015
250	251.8	20.3194	64.226	810.416	Shen et al., 2015		250	Chaohu	Spathian	44.38	25.06	0.25	Wei et al., 2015
250	251.4	16.4314	49.953	642.92	Shen et al., 2015		250	Chaohu	Spathian	43.45	19.15	0.37	Wei et al., 2015
250	250.5	0	30.2623	323.317	Shen et al., 2015		250	Chaohu	Spathian	92.85	74.78	0.26	Wei et al., 2015
250	249	0	39.2194	1131.18	Shen et al., 2015		250	Chaohu	Spathian	69.44	36.52	0.16	Wei et al., 2015
250	253	11.5245	121.001	278.197	Shen et al., 2015		250	Chaohu	Spathian	62.34	53.08	0.22	Wei et al., 2015
250	251.8	0	64.7018	147.913	Shen et al., 2015		250	Chaohu	Spathian	76.29	36.8	0.16	Wei et al., 2015
250	251.4	131.205	150.211	169.218	Shen et al., 2015		250	Chaohu	Spathian	62.83	54.03	0.13	Wei et al., 2015
250	250.5	47.2396	72.5658	97.892	Shen et al., 2015		250	Chaohu	Spathian	38.07	23.98	0.02	Wei et al., 2015
250	253	0	389.479	1602.28	Shen et al., 2015		250	Chaohu	Spathian	43.99	39.39	0.12	Wei et al., 2015
250	251.8	0	81.5763	210.181	Shen et al., 2015		250	Chaohu	Spathian	35.08	17.23	0.17	Wei et al., 2015
250	253	0	27.6286	112.867	Shen et al., 2015		250	Chaohu	Spathian	47.38	31.98	0.23	Wei et al., 2015
250	251.8	3.42113	18.5163	55.2369	Shen et al., 2015		250	Chaohu	Spathian	39.33	30.46	0.21	Wei et al., 2015
250	251.4	0	22.8814	64.3641	Shen et al., 2015		250	Chaohu	Spathian	39.37	29.19	0.19	Wei et al., 2015
250	253	19.0384	210.125	902.786	Shen et al., 2015		250	Chaohu	Spathian	32.82	21.36	0.18	Wei et al., 2015
250	251.8	7.23577	184.448	1135.12	Shen et al., 2015		250	Chaohu	Spathian	46.32	34.16	0.28	Wei et al., 2015
250	251.4	18.87	123.936	289.823	Shen et al., 2015		250	Chaohu	Spathian	45.23	40.71	0.17	Wei et al., 2015
							250	Chaohu	Spathian	34.08	20.19	0.15	Wei et al., 2015
							250	Chaohu	Spathian	42.43	35.14	0.68	Wei et al., 2015
							250	Chaohu	Spathian	1831.81	1816.45	0.19	Wei et al., 2015
							250	Chaohu	Spathian	45.1	29.73	0.15	Wei et al., 2015
							250	Chaohu	Spathian	43.18	30.6	0.2	Wei et al., 2015
							250	Chaohu	Spathian	44.98	36.39	0.16	Wei et al., 2015
							250	Chaohu	Spathian	43.2	26.27	0.22	Wei et al., 2015
							250	Chaohu	Spathian	50.49	47.44	0.17	Wei et al., 2015
							250	Chaohu	Spathian	63.35	22.43	0.22	Wei et al., 2015
							250	Chaohu	Spathian	42.69	29.75		Wei et al., 2015
							250	Chaohu	Spathian	500.46	496.55	0.17	Wei et al., 2015
							250	Chaohu	Spathian	901.79	885.49	0.18	Wei et al., 2015
							250	Chaohu	Spathian	1653.11	1636.41	0.18	Wei et al., 2015
							250	Chaohu	Spathian	63.79	45.9	0.24	Wei et al., 2015
							250	Chaohu	Spathian	58.62	52.9	0.18	Wei et al., 2015
							250	Chaohu	Spathian	49.48	27.7	0.19	Wei et al., 2015
							250	Chaohu	Spathian	50.34	35.2	0.28	Wei et al., 2015
							250	Chaohu	Spathian	39.64	48.3	0.15	Wei et al., 2015
							250	Chaohu	Spathian	102.01	58.1	0.51	Wei et al., 2015
							250	Chaohu	Spathian	44.97	38.37	0.19	Wei et al., 2015
							250	Chaohu	Spathian	45.78	25.53	0.15	Wei et al., 2015
							250	Chaohu	Spathian	79.59	51.9	0.27	Wei et al., 2015
							250	Chaohu	Spathian	96.69	48.33	0.31	Wei et al., 2015
							250	Chaohu	Spathian	342.24	142.83	1.78	Wei et al., 2015
							250	Chaohu	Spathian	155.55	132.64	0.69	Wei et al., 2015
							250	Chaohu	Spathian	327.73	42.58	1.65	Wei et al., 2015
							250	Chaohu	Spathian	1792.25	1771.3	0.15	Wei et al., 2015
							250	Chaohu	Spathian	43168.4		0.17	Wei et al., 2015
							250	Chaohu	Spathian	289.98	253.05	0.31	Wei et al., 2015
							250	Chaohu	Spathian	1037.98	988.97	0.45	Wei et al., 2015
							250	Chaohu	Spathian	7056.73		2.16	Wei et al., 2015
							250	Chaohu	Spathian	1843.92	1784.04	0.42	Wei et al., 2015
							250	Chaohu	Spathian	1419.42	1373.73	0.35	Wei et al., 2015
							250	Chaohu	Spathian	357.57	129.85	1.96	Wei et al., 2015
							250	Chaohu	Spathian	88.78	43.3	0.35	Wei et al., 2015
							250	Chaohu	Spathian	358.03	320.56	0.37	Wei et al., 2015
							250	Chaohu	Spathian	7956.72		0.27	Wei et al., 2015
							250	Chaohu	Spathian	92.08	59.24	0.27	Wei et al., 2015
							250	Chaohu	Spathian	1043.11	1025.6	0.2	Wei et al., 2015
							250	Chaohu	Spathian	276.52	256.25	0.26	Wei et al., 2015
							250	Chaohu	Spathian	69.6	51.44	0.22	Wei et al., 2015
							250	Chaohu	Spathian	178.39	141.39	0.39	Wei et al., 2015
							250	Chaohu	Spathian	66.57	35.02	0.28	Wei et al., 2015
							250	Chaohu	Spathian	56.46	37.38	0.19	Wei et al., 2015
							250	Chaohu	Spathian	48.11	31.23	0.27	Wei et al., 2015
							250	Chaohu	Spathian	35.48	32.36	0.15	Wei et al., 2015
							250	Chaohu	Spathian	198.24	186.46	0.2	Wei et al., 2015
							250	Chaohu	Spathian	113.93	101.39	0.16	Wei et al., 2015
							250	Chaohu	Spathian	175.69	169.52	0.16	Wei et al., 2015
							250	Chaohu	Spathian	44.83	30.53	0.17	Wei et al., 2015
							250	Chaohu	Spathian	266.21	8.68	0.15	Wei et al., 2015
							250	Chaohu	Spathian	30.76	27.97	1.5	Wei et al., 2015
							250	Chaohu	Spathian	324.05	6.9	0.14	Wei et al., 2015
							250	Chaohu	Spathian	39.44	34.87	0.96	Wei et al., 2015
							250	Chaohu	Spathian	26.46	20.46	0.2	Wei et al., 2015
							250	Chaohu	Spathian	84.67	51.85	0.11	Wei et al., 2015
							250	Chaohu	Spathian	59.28	55.78	0.2	Wei et al., 2015
							250	Chaohu	Spathian	36.37	28.22	0.16	Wei et al., 2015
							250	Chaohu	Spathian	68.48	53.2	0.11	Wei et al., 2015
							250	Chaohu	Spathian	106.09	90.6	0.18	Wei et al., 2015
							250	Chaohu	Spathian	250.33	92.62	1.2	Wei et al., 2015
							250	Chaohu	Spathian	91.88	60.74	0.14	Wei et al., 2015
							250	Chaohu	Spathian	72.28	55.27	0.1	Wei et al., 2015
							250	Chaohu	Spathian	48.91	36.58	0.12	Wei et al., 2015
							250	Chaohu	Spathian	67.04	21.79	0.26	Wei et al., 2015
							250	Chaohu	Spathian	43.68	18.6	0.14	Wei et al., 2015
							250	Chaohu	Spathian	296.66	14.91	0.61	Wei et al., 2015
							250	Chaohu	Spathian	249.58	64.2	0.48	Wei et al., 2015
							250	Chaohu	Spathian	58.86	6.82	0.18	Wei et al., 2015
							250	Chaohu	Spathian	48.67	16.16	0.14	Wei et al., 2015
							250	Chaohu	Spathian	41.47	8.42	0.17	Wei et al., 2015
							250	Chaohu	Spathian	56.6	15.25	0.15	Wei et al., 2015
							250	Chaohu	Spathian	49.37	23.36	0.16	Wei et al., 2015
							250	Chaohu	Spathian	83.58	25.18	0.23	Wei et al., 2015
							250	Chaohu	Spathian	94.5	62.55	0.15	Wei et al., 2015
							250	Chaohu	Spathian	103.95	30.02	0.24	Wei et al., 2015
							250	Chaohu	Spathian	105.96	18.43	0.3	Wei et al., 2015
							250	Chaohu	Spathian	49.75	15.39	0.09	Wei et al., 2015
							250	Chaohu	Spathian	309.31	0	0.54	Wei et al., 2015
							250	Chaohu	Spathian	51.41	23.52	0.15	Wei et al., 2015
							250	Chaohu	Spathian	128.22	42.85	0.37	Wei et al., 2015
							250	Chaohu	Spathian	52.8	10.13	0.1	Wei et al., 2015
							250	Chaohu	Spathian	66.03	52.57	0.08	Wei et al., 2015
							250	Chaohu	Spathian	41.75	10.32	0.09	Wei et al., 2015
							250	Chaohu	Spathian	361.9	43.2	0.15	Wei et al., 2015
							250	Chaohu	Spathian	48.94	21.59	0.09	Wei et al., 2015
							250	Chaohu	Spathian	338.52	32.99	0.38	Wei et al., 2015
							250	Chaohu	Spathian	95.59	45.6	0.1	Wei et al., 2015
							250	Chaohu	Spathian	331.19	7.07	0.49	Wei et al., 2015
							250	Chaohu	Spathian	46.34	16.79	0.12	Wei et al., 2015
							250	Chaohu	Spathian	208.27	49.3	0.31	Wei et al., 2015
							250	Chaohu	Spathian	100	16.23	0.11	Wei et al., 2015
							250	Chaohu	Spathian	284.89	35.6	0.56	Wei et al., 2015
							250	Chaohu	Spathian	130.46	26.6	0.19	Wei et al., 2015
							250	Chaohu	Spathian	133.87	28.78	0.17	Wei et al., 2015
							250	Chaohu	Spathian	99.3	22.21	0.11	Wei et al., 2015
							250	Chaohu	Spathian	324.8	39.62	0.35	Wei et al., 2015
							250	Chaohu	Spathian	104.15	34.87	0.23	Wei et al., 2015
							250	Chaohu	Spathian	245.25	63.04	0.44	Wei et al., 2015
							250	Chaohu	Spathian	377.15	54.2	0.44	Wei et al., 2015
							250	Chaohu	Spathian	228.7	66.11	0.18	Wei et al., 2015
							250	Chaohu	Spathian	135.3	88.61	0.16	Wei et al., 2015
							250	Chaohu	Spathian	62.74	13.92	0.14	Wei et al., 2015
							250	Chaohu	Spathian	365.52	14.42	0.37	Wei et al., 2015
							250	Chaohu	Spathian	141.12	75.98	0.12	Wei et al., 2015
							250	Chaohu	Spathian	33.48	7.42		Wei et al., 2015
							250	Chaohu	Spathian	163.58	0		Wei et al., 2015
							250	Chaohu	Spathian	74.45	1.63		Wei et al., 2015
							250	Chaohu	Spathian	64.61	15.03		Wei et al., 2015
							250	Chaohu	Spathian	31.23	22.69		Wei et al., 2015
							250	Chaohu	Spathian	30.62	21.02		Wei et al., 2015
							250	Chaohu	Spathian	26.35	18.81		Wei et al., 2015
							250	Chaohu	Spathian	32.59	24.59		Wei et al., 2015
							250	Chaohu	Spathian	248.1	14.7		Wei et al., 2015
							250	Chaohu	Spathian	32.71	0		Wei et al., 2015
							250	Chaohu	Spathian	32.45	26.21	0.1	Wei et al., 2015
							250	Chaohu	Spathian	26.18	16.89		Wei et al., 2015
							250	Chaohu	Spathian	32.99	20.98		Wei et al., 2015
							250	Chaohu	Spathian	34.27	16.13		Wei et al., 2015
							250	Chaohu	Spathian	30.77	28.08		Wei et al., 2015
							250	Chaohu	Spathian	30.49	25.73		Wei et al., 2015
							250	Chaohu	Spathian	38.35	19.92		Wei et al., 2015
							250	Chaohu	Spathian	75.61	0		Wei et al., 2015
							250	Chaohu	Spathian	62.03	0		Wei et al., 2015
							250	Chaohu	Spathian	61.11	0		Wei et al., 2015
							250	Chaohu	Spathian	45.41	0		Wei et al., 2015
							250	Chaohu	Spathian	58.9	0		Wei et al., 2015
							250	Chaohu	Spathian	58.38	0	0.23	Wei et al., 2015
							250	Chaohu	Spathian	68.08	8.91		Wei et al., 2015
							250	Chaohu	Spathian	50.8	0	0.14	Wei et al., 2015
							250	Chaohu	Spathian	39.92	0		Wei et al., 2015
							250	Chaohu	Spathian	50.98	1.11	0.18	Wei et al., 2015
							250	Chaohu	Spathian	58.29	0		Wei et al., 2015
							250	Chaohu	Spathian	37.79	29.81	0.15	Wei et al., 2015
							250	Chaohu	Spathian	38.98	0	0.22	Wei et al., 2015
							250	Chaohu	Spathian	37.2	20.73	0.17	Wei et al., 2015
							250	Chaohu	Spathian	105.91	2.26	0.33	Wei et al., 2015
							250	Chaohu	Spathian	54.5	39.34		Wei et al., 2015
							250	Chaohu	Spathian	59.05	4.67	0.16	Wei et al., 2015
							250	Chaohu	Spathian	61	38.05	0.19	Wei et al., 2015
							250	Chaohu	Spathian	205.45	0	1.33	Wei et al., 2015
							250	Chaohu	Spathian	61.94	6.26	0.16	Wei et al., 2015
							250	Chaohu	Smithian	1016.44	951.73	0.16	Wei et al., 2015
							250	Chaohu	Smithian	245.2	36.82	0.78	Wei et al., 2015
							250	Chaohu	Smithian	188.13	0	0.8	Wei et al., 2015
							250	Chaohu	Smithian	260.22	25.55	1.27	Wei et al., 2015
							250	Chaohu	Smithian	60.67	14.88	0.15	Wei et al., 2015
							250	Chaohu	Smithian	222.77	2.68	0.29	Wei et al., 2015
							250	Chaohu	Smithian	99.79	0	0.28	Wei et al., 2015
							250	Chaohu	Smithian	373.23	311.46	0.15	Wei et al., 2015
							250	Chaohu	Smithian	577.04	351.31	0.56	Wei et al., 2015
							250	Chaohu	Smithian	34.55	6.04	0.17	Wei et al., 2015
							250	Chaohu	Smithian	221.15	202.67		Wei et al., 2015
							250	Chaohu	Smithian	515.34	408.5	0.11	Wei et al., 2015
							250	Chaohu	Smithian	85.55	45.58		Wei et al., 2015
							250	Chaohu	Smithian	802.32	722.27	0.16	Wei et al., 2015
							250	Chaohu	Smithian	154.15	74.85	0.13	Wei et al., 2015
							250	Chaohu	Smithian	314.14	169.66		Wei et al., 2015
							250	Chaohu	Smithian	206.1	124.27		Wei et al., 2015
							250	Chaohu	Smithian	346.64	267.41	0.14	Wei et al., 2015
							250	Chaohu	Smithian	103.06	79.33	0.12	Wei et al., 2015
							250	Chaohu	Smithian	136.41	85.46	0.13	Wei et al., 2015
							250	Chaohu	Smithian	284.15	154.34	0.15	Wei et al., 2015
							250	Chaohu	Smithian	236.52	162.4	0.14	Wei et al., 2015
							250	Chaohu	Smithian	86.29	46.44	0.11	Wei et al., 2015
							250	Chaohu	Smithian	279.49	124.7	0.15	Wei et al., 2015
							250	Chaohu	Smithian	111.4	14.63	0.14	Wei et al., 2015
							250	Chaohu	Smithian	78.2	38.04	0.15	Wei et al., 2015
							250	Chaohu	Smithian	260.62	191.66	0.16	Wei et al., 2015
							250	Chaohu	Smithian	347.46	170.72	0.18	Wei et al., 2015
							250	Chaohu	Smithian	376.94	156.01		Wei et al., 2015
							250	Chaohu	Smithian	86.89	0	0.15	Wei et al., 2015
							250	Chaohu	Smithian	168.39	99.73		Wei et al., 2015
							250	Chaohu	Smithian	435.86	210.09	0.32	Wei et al., 2015
							250	Chaohu	Smithian	513.89	444.4	0.15	Wei et al., 2015
							250	Chaohu	Smithian	144.03	90.69	0.14	Wei et al., 2015
							250	Chaohu	Smithian	1541.93	1343.4	0.33	Wei et al., 2015
							250	Chaohu	Smithian	392.76	336.59	0.16	Wei et al., 2015
							250	Chaohu	Smithian	198.84	134.06	0.13	Wei et al., 2015
							250	Chaohu	Smithian	944.6	746.45	0.26	Wei et al., 2015
							250	Chaohu	Smithian	599.21	353.82	0.22	Wei et al., 2015
							250	Chaohu	Smithian	581	364.16	0.18	Wei et al., 2015
							250	Chaohu	Smithian	456.11	213.84	0.17	Wei et al., 2015
							250	Chaohu	Smithian	293.95	271.84	0.14	Wei et al., 2015
							250	Chaohu	Smithian	463.57	206.06	0.29	Wei et al., 2015
							250	Chaohu	Smithian	172.81	145.9	0.16	Wei et al., 2015
							250	Chaohu	Smithian	634.83	608.39		Wei et al., 2015
							250	Chaohu	Smithian	485.82	281.69	0.28	Wei et al., 2015
							250	Chaohu	Smithian	556.37	317.63	0.29	Wei et al., 2015
							250	Chaohu	Smithian	429.17	237.81	0.18	Wei et al., 2015
							250	Chaohu	Smithian	611.77	376.19	0.36	Wei et al., 2015
							250	Chaohu	Smithian	442.79	217.22	0.42	Wei et al., 2015
							250	Chaohu	Smithian	693.53	444.66		Wei et al., 2015
							250	Chaohu	Smithian	521.29	285.13	0.29	Wei et al., 2015
							250	Chaohu	Smithian	517.15	274.69	0.3	Wei et al., 2015
							250	Chaohu	Smithian	571.33	324.71	0.37	Wei et al., 2015
							250	Chaohu	Smithian	432.3	221.23	0.27	Wei et al., 2015
							250	Chaohu	Smithian	249.89	148.91	0.22	Wei et al., 2015
							250	Chaohu	Smithian	102.69	54.37		Wei et al., 2015
							250	Chaohu	Smithian	562.01	323.34	0.27	Wei et al., 2015
							250	Chaohu	Smithian	529.75	297.15	0.26	Wei et al., 2015
							250	Chaohu	Smithian	524.47	314.38		Wei et al., 2015
							250	Chaohu	Smithian	744.85	528.97	0.24	Wei et al., 2015
							250	Chaohu	Smithian	492.71	274.15	0.2	Wei et al., 2015
							250	Chaohu	Smithian	549.13	316.8	0.21	Wei et al., 2015
							250	Chaohu	Smithian	487.1	251.64	0.2	Wei et al., 2015
							250	Chaohu	Smithian	492.67	254.68	0.26	Wei et al., 2015
							250	Chaohu	Smithian	507.04	273.96	0.25	Wei et al., 2015
							250	Chaohu	Smithian	576.92	333.3	0.18	Wei et al., 2015
							250	Chaohu	Smithian	542.16	295.41	0.22	Wei et al., 2015
							250	Chaohu	Smithian	402	249.95	0.17	Wei et al., 2015
							250	Chaohu	Smithian	579.9	341.06		Wei et al., 2015
							250	Chaohu	Smithian	414.33	239.8	0.14	Wei et al., 2015
							250	Chaohu	Smithian	160.26	119.04	0.14	Wei et al., 2015
							250	Chaohu	Smithian	456.44	225.91	0.18	Wei et al., 2015
							250	Chaohu	Smithian	567.69	308.37	0.14	Wei et al., 2015
							250	Chaohu	Smithian	424.66	193.15		Wei et al., 2015
							250	Chaohu	Smithian	95.72	64.02	0.12	Wei et al., 2015
							250	Chaohu	Smithian	405.94	200.29	0.2	Wei et al., 2015
							250	Chaohu	Smithian	58.81	0		Wei et al., 2015
							250	Chaohu	Smithian	234.72	93.12	0.16	Wei et al., 2015
							250	Chaohu	Smithian	62.16	0	0.09	Wei et al., 2015
							250	Chaohu	Smithian	427.08	214.22	0.24	Wei et al., 2015
							250	Chaohu	Smithian	155.03	3.9	0.12	Wei et al., 2015
							250	Chaohu	Smithian	170.55	27.13	0.13	Wei et al., 2015
							250	Chaohu	Smithian	160.18	9.61	0.12	Wei et al., 2015
							250	Chaohu	Smithian	85.95	0	0.12	Wei et al., 2015
							250	Chaohu	Smithian	74.84	8.28	0.38	Wei et al., 2015
							250	Chaohu	Smithian	97.55	19.58	0.08	Wei et al., 2015
							250	Chaohu	Smithian	64.43	2.3	0.2	Wei et al., 2015
							250	Chaohu	Smithian	167.87	38.95		Wei et al., 2015
							250	Chaohu	Smithian	70.87	0	0.22	Wei et al., 2015
							250	Chaohu	Smithian	207.82	74.07	0.1	Wei et al., 2015
							250	Chaohu	Smithian	54.58	0	0.09	Wei et al., 2015
							250	Chaohu	Smithian	96.14	37.86	0.11	Wei et al., 2015
							250	Chaohu	Smithian	225.82	66.85	0.11	Wei et al., 2015
							250	Chaohu	Smithian	85.48	11.66	0.19	Wei et al., 2015
							250	Chaohu	Smithian	180.76	42.81	0.13	Wei et al., 2015
							250	Chaohu	Smithian	61.87	0	0.15	Wei et al., 2015
							250	Chaohu	Smithian	143.98	14.35	0.08	Wei et al., 2015
							250	Chaohu	Smithian	75.58	32.83	1.03	Wei et al., 2015
							250	Chaohu	Smithian	323.75	104.48	1.49	Wei et al., 2015
							250	Chaohu	Smithian	358.48	143.11	0.38	Wei et al., 2015
							250	Chaohu	Smithian	356.31	141.58	0.13	Wei et al., 2015
							250	Chaohu	Dienerian	1795.35	1723.87	0.15	Wei et al., 2015
							250	Chaohu	Dienerian	1440.26	1329.75	0.11	Wei et al., 2015
							250	Chaohu	Dienerian	166.33	86.5		Wei et al., 2015
							250	Chaohu	Dienerian	401.29	295.41	0.24	Wei et al., 2015
							250	Chaohu	Dienerian	324.76	102.58	0.13	Wei et al., 2015
							250	Chaohu	Dienerian	52.05	0	0.33	Wei et al., 2015
							250	Chaohu	Dienerian	365.6	147.35		Wei et al., 2015
							250	Chaohu	Dienerian	688.9	540.5	0.12	Wei et al., 2015
							250	Chaohu	Dienerian	71.72	0	0.26	Wei et al., 2015
							250	Chaohu	Dienerian	367.51	142.6	0.11	Wei et al., 2015
							250	Chaohu	Dienerian	115.65	40.79	0.1	Wei et al., 2015
							250	Chaohu	Dienerian	81.73	6.77	0.32	Wei et al., 2015
							250	Chaohu	Dienerian	331.77	111.07	0.12	Wei et al., 2015
							250	Chaohu	Dienerian	102.61	0	0.09	Wei et al., 2015
							250	Chaohu	Dienerian	47.92	0	0.38	Wei et al., 2015
							250	Chaohu	Dienerian	326.73	103.19	0.1	Wei et al., 2015
							250	Chaohu	Dienerian	74.15	0	0.1	Wei et al., 2015
							250	Chaohu	Dienerian	268.22	69.51	0.09	Wei et al., 2015
							250	Chaohu	Dienerian	67.71	0.84	0.12	Wei et al., 2015
							250	Chaohu	Dienerian	158.7	23.84	0.08	Wei et al., 2015
							250	Chaohu	Dienerian	50.11	0	0.29	Wei et al., 2015
							250	Chaohu	Dienerian	386.39	165.01	0.08	Wei et al., 2015
							250	Chaohu	Dienerian	162.38	7.02	0.3	Wei et al., 2015
							250	Chaohu	Dienerian	363.39	145.54	0.1	Wei et al., 2015
							250	Chaohu	Dienerian	62.43	0	0.08	Wei et al., 2015
							250	Chaohu	Dienerian	89.19	0	0.38	Wei et al., 2015
							250	Chaohu	Dienerian	360.69	146.06	0.11	Wei et al., 2015
							250	Chaohu	Dienerian	77.96	0	0.12	Wei et al., 2015
							250	Chaohu	Dienerian	77.68	3.97	0.28	Wei et al., 2015
							250	Chaohu	Dienerian	362.21	142.67	0.11	Wei et al., 2015
							250	Chaohu	Dienerian	85.41	0	0.33	Wei et al., 2015
							250	Chaohu	Dienerian	340.98	138.75	0.37	Wei et al., 2015
							250	Chaohu	Dienerian	363.9	181.63	0.12	Wei et al., 2015
							250	Chaohu	Dienerian	70.66	3.76	0.12	Wei et al., 2015
							250	Chaohu	Dienerian	69.27	0	0.42	Wei et al., 2015
							250	Chaohu	Dienerian	400.12	187.33	0.1	Wei et al., 2015
							250	Chaohu	Dienerian	303.39	251.47	0.1	Wei et al., 2015
							250	Chaohu	Dienerian	84.06	0	0.41	Wei et al., 2015
							250	Chaohu	Dienerian	386.96	170.94	0.1	Wei et al., 2015
							250	Chaohu	Dienerian	345.03	239.9	0.35	Wei et al., 2015
							250	Chaohu	Dienerian	366.02	155.75	0.13	Wei et al., 2015
							250	Chaohu	Dienerian	156.77	14.41	0.33	Wei et al., 2015
							250	Chaohu	Dienerian	328.17	117.12	0.12	Wei et al., 2015
							250	Chaohu	Dienerian	62.34	0	0.12	Wei et al., 2015
							250	Chaohu	Griesbachian	318.3	110.94	0.09	Wei et al., 2015
							250	Chaohu	Griesbachian	68.37	0	0.1	Wei et al., 2015
							250	Chaohu	Griesbachian	88.34	0	0.12	Wei et al., 2015
							250	Chaohu	Griesbachian	95.82	0	0.34	Wei et al., 2015
							250	Chaohu	Griesbachian	383.95	155.76	0.13	Wei et al., 2015
							250	Chaohu	Griesbachian	64.8	0	0.18	Wei et al., 2015
							250	Chaohu	Griesbachian	241.61	74.65	0.18	Wei et al., 2015
							250	Chaohu	Griesbachian	266.65	123.74	0.48	Wei et al., 2015
							250	Chaohu	Griesbachian	369.59	152.34	0.11	Wei et al., 2015
							250	Chaohu	Griesbachian	75.6	14.05	0.27	Wei et al., 2015
							250	Chaohu	Griesbachian	411.24	202.96	0.1	Wei et al., 2015
							250	Chaohu	Griesbachian	118.12	51.73	0.2	Wei et al., 2015
							250	Chaohu	Griesbachian	78.26	23.54	0.37	Wei et al., 2015
							250	Chaohu	Griesbachian	4893.21		0.09	Wei et al., 2015
							250	Chaohu	Griesbachian	94.22	30.74	0.35	Wei et al., 2015
							250	Chaohu	Griesbachian	2272.51	2050.06	0.09	Wei et al., 2015
							250	Chaohu	Griesbachian	101.86	14.07	0.12	Wei et al., 2015
							250	Chaohu	Griesbachian	255.02	112.76	0.1	Wei et al., 2015
							250	Chaohu	Griesbachian	170.24	66.41	0.43	Wei et al., 2015
							250	Chaohu	Griesbachian	5094.43		0.07	Wei et al., 2015
							250	Chaohu	Griesbachian	354.57	292.2	0.08	Wei et al., 2015
							250	Chaohu	Griesbachian	151.24	59.25	0.14	Wei et al., 2015
							250	Chaohu	Griesbachian	370.17	182.64	0.32	Wei et al., 2015
							250	Chaohu	Griesbachian	423.14	223.88	0.1	Wei et al., 2015
							250	Chaohu	Griesbachian	251.7	126.14	0.14	Wei et al., 2015
							250	Chaohu	Griesbachian	193.19	62.69	0.32	Wei et al., 2015
							250	Chaohu	Griesbachian	949.84	799.05	0.1	Wei et al., 2015
							250	Chaohu	Griesbachian	220.91	95.28	0.14	Wei et al., 2015
							250	Chaohu	Griesbachian	484.76	263.41	0.26	Wei et al., 2015
							250	Chaohu	Griesbachian	293.62	161.26	0.19	Wei et al., 2015
							250	Chaohu	Griesbachian	91.49	1.21	0.61	Wei et al., 2015
							250	Chaohu	Griesbachian	3204.84	2991.81	0.19	Wei et al., 2015
							250	Chaohu	Griesbachian	295.15	147.01	0.1	Wei et al., 2015
							250	Chaohu	Griesbachian	384.77	169.14	0.11	Wei et al., 2015
							250	Chaohu	Griesbachian	236.52	94.03	0.26	Wei et al., 2015
							250	Chaohu	Griesbachian	127.16	35.17	0.2	Wei et al., 2015
							250	Chaohu	Griesbachian	100.6	0	0.13	Wei et al., 2015
							250	Chaohu	Griesbachian	219.49	74.71	0.12	Wei et al., 2015
							250	Chaohu	Griesbachian	92.28	30.08	0.11	Wei et al., 2015
							250	Chaohu	Griesbachian	131.91	48.83	0.15	Wei et al., 2015
							250	Chaohu	Griesbachian	153.74	52.07	0.08	Wei et al., 2015
							250	Chaohu	Griesbachian	94.01	0	0.08	Wei et al., 2015
							250	Chaohu	Griesbachian	131.66	64.06	0.1	Wei et al., 2015
							250	Chaohu	Griesbachian	212.69	120.04	0.08	Wei et al., 2015
							250	Chaohu	Griesbachian	111.02	0	0.11	Wei et al., 2015
							250	Chaohu	Griesbachian	73.11	0	0.14	Wei et al., 2015
							250	Chaohu	Griesbachian	160.67	0	0.1	Wei et al., 2015
							250	Chaohu	Griesbachian	253.53	129.26	0.2	Wei et al., 2015
							250	Chaohu	Griesbachian	73.11	0	0.11	Wei et al., 2015
							250	Chaohu	Griesbachian	84.69	2.35	0.11	Wei et al., 2015
							250	Chaohu	Griesbachian	223.77	94.91	0.12	Wei et al., 2015
							250	Chaohu	Griesbachian	72.84	1.41	0.12	Wei et al., 2015
							250	Chaohu	Griesbachian	328.12	163.29	0.13	Wei et al., 2015
							250	Chaohu	Griesbachian	93.34	21.9	0.12	Wei et al., 2015
							250	Chaohu	Griesbachian	112.1	32.08	0.13	Wei et al., 2015
							250	Chaohu	Griesbachian	139.25	70.19	0.14	Wei et al., 2015
							250	Chaohu	Griesbachian	119.25	24.07	0.11	Wei et al., 2015
							250	Chaohu	Griesbachian	236.37	159.74	0.11	Wei et al., 2015
							250	Chaohu	Griesbachian	259.02	38.55	0.15	Wei et al., 2015
							250	Chaohu	Griesbachian	86.23	2.7	0.1	Wei et al., 2015
							250	Chaohu	Griesbachian	110.45	9.43	0.1	Wei et al., 2015
							250	Chaohu	Griesbachian	227.39	23.39	0.14	Wei et al., 2015
							250	Chaohu	Griesbachian	211.09	12.93	0.12	Wei et al., 2015
							250	Chaohu	Griesbachian	142.5	0	0.11	Wei et al., 2015
							250	Chaohu	Griesbachian	80.05	11	0.16	Wei et al., 2015
							250	Chaohu	Griesbachian	230.82	7.6		Wei et al., 2015
							250	Chaohu	Griesbachian	180.85	0		Wei et al., 2015
							250	Chaohu	Griesbachian	176.26	0		Wei et al., 2015
							250	Chaohu	Griesbachian	222.13	15.83		Wei et al., 2015
							250	Chaohu	Griesbachian	260.37	20.77	0.09	Wei et al., 2015
							250	Chaohu	Griesbachian	66.15	10.61	0.1	Wei et al., 2015
							250	Chaohu	Griesbachian	286.58	0	0.09	Wei et al., 2015
							250	Chaohu	Griesbachian	186.36	0	0.08	Wei et al., 2015
							250	Chaohu	Griesbachian	206.26	6.93	0.07	Wei et al., 2015
							250	Chaohu	Griesbachian	208.33	0	0.1	Wei et al., 2015
							250	Chaohu	Griesbachian	155.63	0	0.09	Wei et al., 2015
							250	Chaohu	Griesbachian	218.82	0	0.07	Wei et al., 2015
							250	Chaohu	Griesbachian	194.38	17.85	0.08	Wei et al., 2015
							250	Chaohu	Griesbachian	164	0	0.09	Wei et al., 2015
							250	Chaohu	Griesbachian	208.41	0	0.08	Wei et al., 2015
							250	Chaohu	Griesbachian	383.98	48	0.08	Wei et al., 2015
							250	Chaohu	Griesbachian	141.86	0	0.08	Wei et al., 2015
							250	Chaohu	Griesbachian	293.57	17.89	0.08	Wei et al., 2015
							250	Chaohu	Griesbachian	368.87	58.53	0.12	Wei et al., 2015
							250	Chaohu	Griesbachian	149.65	0	0.08	Wei et al., 2015
							250	Chaohu	Griesbachian	202.19	0	0.09	Wei et al., 2015
							250	Chaohu	Griesbachian	186.32	22.93	0.09	Wei et al., 2015
							250	Chaohu	Griesbachian	136.28	0	0.13	Wei et al., 2015
							250	Chaohu	Griesbachian	135.14	0	0.1	Wei et al., 2015
							250	Chaohu	Griesbachian	341.76	0.29	0.12	Wei et al., 2015
							250	Chaohu	Griesbachian	129.53	0	0.08	Wei et al., 2015
							250	Chaohu	Griesbachian	232.67	39.36	0.09	Wei et al., 2015
							250	Chaohu	Griesbachian	391.01	63.24	0.09	Wei et al., 2015
							250	Chaohu	Griesbachian	236.88	7.23	0.13	Wei et al., 2015
							250	Chaohu	Griesbachian	360.15	34.93	0.1	Wei et al., 2015
							250	Chaohu	Griesbachian	184.06	19.59	0.12	Wei et al., 2015
							250	Chaohu	Griesbachian	351.74	29.82	0.07	Wei et al., 2015
							250	Chaohu	Changhsingian	389.6	66.05	0.24	Wei et al., 2015
							250	Chaohu	Changhsingian	83.59	0	0.13	Wei et al., 2015
							250	Chaohu	Changhsingian	163	0	0.14	Wei et al., 2015
							250	Chaohu	Changhsingian	323.29	35.89	0.32	Wei et al., 2015
							250	Chaohu	Changhsingian	336.24	54.76	0.52	Wei et al., 2015
							250	Chaohu	Changhsingian	342.75	78.02	1.33	Wei et al., 2015
							250	Chaohu	Changhsingian	203.24	15.7	2.84	Wei et al., 2015
							250	Chaohu	Changhsingian	299.88	41.92	0.1	Wei et al., 2015
							250	Chaohu	Changhsingian	115.02	0	0.51	Wei et al., 2015
							250	Chaohu	Changhsingian	1956.22	1783.64	0.24	Wei et al., 2015
							250	Chaohu	Changhsingian	549.24	311.48	0.17	Wei et al., 2015
							250	Chaohu	Changhsingian	1891.61	1877.05	1.91	Wei et al., 2015
							250	Chaohu	Changhsingian	1259.92	1187.22	0.11	Wei et al., 2015
							250	Chaohu	Griesbachian	354.89	93.02	0.23	Wei et al., 2015
							250	Chaohu	Griesbachian	201.71	86.44	0.16	Wei et al., 2015
							250	Chaohu	Griesbachian	173.65	82.63	0.23	Wei et al., 2015
							250	Chaohu	Griesbachian	135.9	99.33	0.2	Wei et al., 2015
							250	Chaohu	Griesbachian	188.91	99.64	0.21	Wei et al., 2015
							250	Chaohu	Griesbachian	135.08	96.9	0.17	Wei et al., 2015
							250	Chaohu	Griesbachian	227.93	132.12	0.12	Wei et al., 2015
							250	Chaohu	Griesbachian	196.58	78.03	0.14	Wei et al., 2015
							250	Chaohu	Griesbachian	163.43	66.84	0.13	Wei et al., 2015
							250	Chaohu	Griesbachian	386.84	140.17	0.16	Wei et al., 2015
							250	Chaohu	Griesbachian	249.94	120.41	0.16	Wei et al., 2015
							250	Chaohu	Griesbachian	191.68	77.48	0.14	Wei et al., 2015
							250	Chaohu	Griesbachian	199.16	88.22	0.14	Wei et al., 2015
							250	Chaohu	Griesbachian	152.99	102.78	0.2	Wei et al., 2015
							250	Chaohu	Griesbachian	185.12	114.89	0.14	Wei et al., 2015
							250	Chaohu	Griesbachian	202.94	138.68	0.13	Wei et al., 2015
							250	Chaohu	Griesbachian	181.34	121.56	0.12	Wei et al., 2015
							250	Chaohu	Griesbachian	185.54	75.49	0.14	Wei et al., 2015
							250	Chaohu	Griesbachian	206.89	68.64	0.17	Wei et al., 2015
							250	Chaohu	Griesbachian	206.22	13.16	0.18	Wei et al., 2015
							250	Chaohu	Changhsingian	41.49	0	0.18	Wei et al., 2015
							250	Chaohu	Changhsingian	328.37	129.37	0.09	Wei et al., 2015
							250	Chaohu	Changhsingian	183.41	99.85	0.14	Wei et al., 2015
							250	Chaohu	Changhsingian	800.72	788.97	0.14	Wei et al., 2015
							250	Chaohu	Changhsingian	154.3	96.3	0.12	Wei et al., 2015
							250	Chaohu	Changhsingian	107225		0.17	Wei et al., 2015
							250	Chaohu	Changhsingian	165.3	115.16	0.14	Wei et al., 2015
							250	Chaohu	Changhsingian	152.92	106.39	0.12	Wei et al., 2015
							250	Chaohu	Changhsingian	195.91	74.47	0.15	Wei et al., 2015
							250	Chaohu	Changhsingian	316.61	70.62	0.13	Wei et al., 2015
							250	Chaohu	Changhsingian	347.75	93.57	0.18	Wei et al., 2015
							250	Chaohu	Changhsingian	344.36	90.73	0.2	Wei et al., 2015
							250	Chaohu	Changhsingian	371.81	110.67	0.19	Wei et al., 2015
							250	Chaohu	Changhsingian	336.78	125.57	0.2	Wei et al., 2015
							250	Chaohu	Changhsingian	105.33	0	0.19	Wei et al., 2015
							250	Chaohu	Changhsingian	307.6	68.43	0.19	Wei et al., 2015
							250	Chaohu	Changhsingian	285.04	85.84	0.44	Wei et al., 2015
							250	Chaohu	Changhsingian	325.52	130.11	0.47	Wei et al., 2015
							250	Chaohu	Changhsingian	320.31	116.44	1.24	Wei et al., 2015
							250	Chaohu	Changhsingian	318.47	126.54	0.59	Wei et al., 2015
							250	Chaohu	Changhsingian	323.26	94.28	0.67	Wei et al., 2015
							250	Chaohu	Changhsingian	149.87	0	5.17	Wei et al., 2015
							250	Chaohu	Changhsingian	316.53	118.28	0.12	Wei et al., 2015
							250	Chaohu	Changhsingian	349.62	155.37	0.17	Wei et al., 2015
							250	Chaohu	Changhsingian	297.29	103.44	0.49	Wei et al., 2015
							250	Chaohu	Changhsingian	358.56	115.32	0.56	Wei et al., 2015
							250	Chaohu	Changhsingian	353.24	141.38	0.24	Wei et al., 2015
							250	Chaohu	Changhsingian	315.23	136.89	0.11	Wei et al., 2015
							250	Chaohu	Changhsingian	281.5	122.81	0.24	Wei et al., 2015
							250	Chaohu	Changhsingian	575.62	437.01	0.16	Wei et al., 2015
							250	Chaohu	Changhsingian	2644.67	2553.03	0.18	Wei et al., 2015
							250	Chaohu	Changhsingian	2866.82	2751.82	0.34	Wei et al., 2015
							250	Chaohu	Changhsingian	1437.61	1347.34	0.21	Wei et al., 2015
							250	Chaohu	Changhsingian	317.13	95.11	0.13	Wei et al., 2015
							250	Chaohu	Changhsingian	294.97	104.63	0.39	Wei et al., 2015
							250	Chaohu	Changhsingian	319.63	120.16	0.36	Wei et al., 2015
							250	Chaohu	Changhsingian	299.39	90.64	0.27	Wei et al., 2015
							250	Chaohu	Changhsingian	274.96	5.96	0.3	Wei et al., 2015
							250	Chaohu	Changhsingian	76.65	0	0.12	Wei et al., 2015
							250	Chaohu	Changhsingian	334.48	108.19	0.13	Wei et al., 2015
							250	Chaohu	Changhsingian	294.24	134.91	0.49	Wei et al., 2015
							250	Chaohu	Changhsingian	361.9	100.18	0.29	Wei et al., 2015
							250	Chaohu	Changhsingian	255.47	124.01	0.19	Wei et al., 2015
							250	Chaohu	Changhsingian	322.89	151.09	0.46	Wei et al., 2015
							250	Chaohu	Changhsingian	324.88	139.83	0.22	Wei et al., 2015
							250	Chaohu	Changhsingian	330.25	148.19	0.51	Wei et al., 2015
							250	Chaohu	Changhsingian	271.08	106.9	0.52	Wei et al., 2015
							250	Chaohu	Changhsingian	261.6	107.19	0.38	Wei et al., 2015
							250	Chaohu	Changhsingian	278.44	123.17	0.35	Wei et al., 2015
							250	Chaohu	Changhsingian	299.8	79.74	0.52	Wei et al., 2015
							250	Chaohu	Changhsingian	356.42	129.02	0.44	Wei et al., 2015
							250	Chaohu	Changhsingian	110.54	0	0.1	Wei et al., 2015
							250	Chaohu	Changhsingian	309.94	117.09		Wei et al., 2015
							250	Chaohu	Changhsingian	291.92	113.45	0.3	Wei et al., 2015
							250	Chaohu	Changhsingian	261.42	99.66	0.24	Wei et al., 2015
							250	Chaohu	Changhsingian	279.75	34.75	0.2	Wei et al., 2015
							250	Chaohu	Changhsingian	155.63	0	0.09	Wei et al., 2015
							250	Chaohu	Changhsingian	292.29	127.86	0.45	Wei et al., 2015
							250	Chaohu	Changhsingian	308.53	139.66	0.28	Wei et al., 2015
							250	Chaohu	Changhsingian	296.3	97.58	0.23	Wei et al., 2015
							250	Chaohu	Changhsingian	317.24	128.1	0.18	Wei et al., 2015
							250	Chaohu	Changhsingian	310.8	115.81	0.35	Wei et al., 2015
							250	Chaohu	Changhsingian	92.57	0	0.1	Wei et al., 2015
							250	Chaohu	Changhsingian	313.89	120.41	0.09	Wei et al., 2015
							250	Chaohu	Changhsingian	257.51	75.91	0.34	Wei et al., 2015
							250	Chaohu	Changhsingian	304.94	108.63	0.21	Wei et al., 2015
							250	Chaohu	Changhsingian	134.29	0	0.31	Wei et al., 2015
							250	Chaohu	Changhsingian	313.07	124.61	0.16	Wei et al., 2015
							250	Chaohu	Changhsingian	275.57	87.12	0.29	Wei et al., 2015
							250	Chaohu	Changhsingian	301.31	109.07	0.29	Wei et al., 2015
							250	Chaohu	Changhsingian	281.76	111.25	0.26	Wei et al., 2015
							250	Chaohu	Changhsingian	273.54	123.21	0.11	Wei et al., 2015
							250	Chaohu	Changhsingian	317.58	94.49	2.51	Wei et al., 2015
							250	Chaohu	Changhsingian	243.65	61.26	0.33	Wei et al., 2015
							250	Chaohu	Changhsingian	109.38	0	0.29	Wei et al., 2015
							250	Chaohu	Changhsingian	307.05	115.13	0.16	Wei et al., 2015
							250	Chaohu	Changhsingian	258.34	226.01	0.3	Wei et al., 2015
							250	Chaohu	Changhsingian	237.74	203.79	0.17	Wei et al., 2015
							250	Chaohu	Changhsingian	217.07	178.27	0.14	Wei et al., 2015
							250	Chaohu	Changhsingian	271.63	81.35	0.22	Wei et al., 2015
							250	Chaohu	Changhsingian	211.29	51.66	0.57	Wei et al., 2015
							250	Chaohu	Changhsingian	97.4	35.85	0.34	Wei et al., 2015
							250	Chaohu	Changhsingian	440.49	279.51	0.18	Wei et al., 2015
							250	Chaohu	Changhsingian	196.02	77.68	0.31	Wei et al., 2015
							250	Chaohu	Changhsingian	214.08	106.08	0.18	Wei et al., 2015
							250	Chaohu	Changhsingian	149.26	83.91	0.31	Wei et al., 2015
							250	Chaohu	Changhsingian	293.46	91.33	0.23	Wei et al., 2015
							250	Chaohu	Changhsingian	282.05	93.05	0.55	Wei et al., 2015
							250	Chaohu	Changhsingian	219.79	68.1	0.35	Wei et al., 2015
							250	Chaohu	Changhsingian	279.68	112.47	0.39	Wei et al., 2015
							250	Chaohu	Changhsingian	275.72	26.5	1.88	Wei et al., 2015
							250	Chaohu	Changhsingian	278.15	139.05	0.99	Wei et al., 2015
							250	Chaohu	Changhsingian	274.2	132.99	0.72	Wei et al., 2015
							250	Chaohu	Changhsingian	292.03	134.54	0.64	Wei et al., 2015
							250	Chaohu	Changhsingian	267.51	147.63	0.89	Wei et al., 2015
							250	Chaohu	Changhsingian	83.58	79.43	0.57	Wei et al., 2015
							250	Chaohu	Changhsingian	144.76	117.87	0.29	Wei et al., 2015
							250	Chaohu	Changhsingian	236.79	185.73	0.35	Wei et al., 2015
							250	Chaohu	Changhsingian	250.69	184.07	0.34	Wei et al., 2015
							250	Chaohu	Changhsingian	247.77	165.07	0.22	Wei et al., 2015
							250	Chaohu	Changhsingian	536.06	330.24	0.58	Wei et al., 2015
							250	Chaohu	Changhsingian	201.65	126.81	0.35	Wei et al., 2015
							250	Chaohu	Changhsingian	153.98	120.64	0.48	Wei et al., 2015
							250	Chaohu	Changhsingian	302.97	80.41	0.25	Wei et al., 2015
							250	Chaohu	Changhsingian	294.6	176.44	0.39	Wei et al., 2015
							250	Chaohu	Changhsingian	258.77	256.53	1.88	Wei et al., 2015
							250	Chaohu	Changhsingian	295.52	297.2	0.3	Wei et al., 2015
							250	Chaohu	Changhsingian	311.09	158.35	0.83	Wei et al., 2015
							250	Chaohu	Changhsingian	190.07	138.48	2.52	Wei et al., 2015
							250	Chaohu	Changhsingian	115.9	104	0.52	Wei et al., 2015
							250	Chaohu	Changhsingian	88.68	104.03	0.53	Wei et al., 2015
							250	Daxiakou	Smithian	28	11	0.13	Wei et al., 2015
							250	Daxiakou	Smithian	32	12	0.11	Wei et al., 2015
							250	Daxiakou	Smithian	33	20	0.09	Wei et al., 2015
							250	Daxiakou	Smithian	27	13	0.11	Wei et al., 2015
							250	Daxiakou	Smithian	38	21	0.11	Wei et al., 2015
							250	Daxiakou	Smithian	38	15	0.14	Wei et al., 2015
							250	Daxiakou	Smithian	70	6	0.18	Wei et al., 2015
							250	Daxiakou	Smithian	37	21	0.19	Wei et al., 2015
							250	Daxiakou	Smithian	37	20	0.15	Wei et al., 2015
							250	Daxiakou	Smithian	33	4	0.11	Wei et al., 2015
							250	Daxiakou	Smithian	29		0.1	Wei et al., 2015
							250	Daxiakou	Smithian	56		0.18	Wei et al., 2015
							250	Daxiakou	Smithian	31	12	0.14	Wei et al., 2015
							250	Daxiakou	Smithian	206	186	0.14	Wei et al., 2015
							250	Daxiakou	Smithian	74	66	0.13	Wei et al., 2015
							250	Daxiakou	Smithian	36	2	0.15	Wei et al., 2015
							250	Daxiakou	Smithian	32	20	0.12	Wei et al., 2015
							250	Daxiakou	Smithian	42	16	0.12	Wei et al., 2015
							250	Daxiakou	Smithian	67	53	0.12	Wei et al., 2015
							250	Daxiakou	Smithian	32	15	0.13	Wei et al., 2015
							250	Daxiakou	Smithian	100	61	0.16	Wei et al., 2015
							250	Daxiakou	Smithian	30	10	0.14	Wei et al., 2015
							250	Daxiakou	Smithian	32	12	0.14	Wei et al., 2015
							250	Daxiakou	Smithian	48	30	0.13	Wei et al., 2015
							250	Daxiakou	Smithian	41	26	0.16	Wei et al., 2015
							250	Daxiakou	Smithian	80	59	0.15	Wei et al., 2015
							250	Daxiakou	Smithian	60	52	0.13	Wei et al., 2015
							250	Daxiakou	Smithian	39		0.13	Wei et al., 2015
							250	Daxiakou	Smithian			0.13	Wei et al., 2015
							250	Daxiakou	Smithian	28	22	0.16	Wei et al., 2015
							250	Daxiakou	Smithian	35	24	0.12	Wei et al., 2015
							250	Daxiakou	Smithian	78	64	0.14	Wei et al., 2015
							250	Daxiakou	Smithian	37	23	0.2	Wei et al., 2015
							250	Daxiakou	Smithian	38	17	0.15	Wei et al., 2015
							250	Daxiakou	Smithian	82	58	0.12	Wei et al., 2015
							250	Daxiakou	Smithian	897	892	0.12	Wei et al., 2015
							250	Daxiakou	Smithian	48	42	0.14	Wei et al., 2015
							250	Daxiakou	Smithian	37		0.14	Wei et al., 2015
							250	Daxiakou	Smithian	246	59	0.21	Wei et al., 2015
							250	Daxiakou	Smithian	201	34	0.24	Wei et al., 2015
							250	Daxiakou	Smithian	69	45	0.14	Wei et al., 2015
							250	Daxiakou	Smithian	48	23	0.2	Wei et al., 2015
							250	Daxiakou	Smithian	387	351	0.17	Wei et al., 2015
							250	Daxiakou	Smithian	48	11	0.15	Wei et al., 2015
							250	Daxiakou	Smithian	356	122	0.32	Wei et al., 2015
							250	Daxiakou	Smithian	48	5	0.16	Wei et al., 2015
							250	Daxiakou	Smithian	42	3	0.14	Wei et al., 2015
							250	Daxiakou	Smithian	41	22	0.12	Wei et al., 2015
							250	Daxiakou	Smithian	43	19	0.16	Wei et al., 2015
							250	Daxiakou	Smithian	35	22	0.12	Wei et al., 2015
							250	Daxiakou	Smithian	107	11		Wei et al., 2015
							250	Daxiakou	Smithian	150	37	0.24	Wei et al., 2015
							250	Daxiakou	Smithian	139	15	0.25	Wei et al., 2015
							250	Daxiakou	Smithian	88	22	0.18	Wei et al., 2015
							250	Daxiakou	Smithian	107	24	0.2	Wei et al., 2015
							250	Daxiakou	Smithian	45	33	0.12	Wei et al., 2015
							250	Daxiakou	Smithian	37	10	0.11	Wei et al., 2015
							250	Daxiakou	Smithian	49	13	0.27	Wei et al., 2015
							250	Daxiakou	Smithian	370	145	0.66	Wei et al., 2015
							250	Daxiakou	Smithian	40	23	0.53	Wei et al., 2015
							250	Daxiakou	Smithian	48	23	0.18	Wei et al., 2015
							250	Daxiakou	Smithian	43		0.21	Wei et al., 2015
							250	Daxiakou	Smithian	126	38	0.2	Wei et al., 2015
							250	Daxiakou	Smithian	57		0.16	Wei et al., 2015
							250	Daxiakou	Smithian	67		0.19	Wei et al., 2015
							250	Daxiakou	Smithian	462	228	0.45	Wei et al., 2015
							250	Daxiakou	Smithian	105	19	0.18	Wei et al., 2015
							250	Daxiakou	Smithian	485	250	0.47	Wei et al., 2015
							250	Daxiakou	Smithian	463	237	0.52	Wei et al., 2015
							250	Daxiakou	Smithian	413	189	0.31	Wei et al., 2015
							250	Daxiakou	Smithian	374	168	0.25	Wei et al., 2015
							250	Daxiakou	Smithian	61	10	0.12	Wei et al., 2015
							250	Daxiakou	Smithian	246	142	0.2	Wei et al., 2015
							250	Daxiakou	Smithian	237	76	0.26	Wei et al., 2015
							250	Daxiakou	Smithian	72	7	0.13	Wei et al., 2015
							250	Daxiakou	Smithian	51	10	0.15	Wei et al., 2015
							250	Daxiakou	Smithian	449	233	0.13	Wei et al., 2015
							250	Daxiakou	Smithian	58	2	0.14	Wei et al., 2015
							250	Daxiakou	Smithian	134	31	0.19	Wei et al., 2015
							250	Daxiakou	Dienerian	498	270	0.67	Wei et al., 2015
							250	Daxiakou	Dienerian	105	23	0.17	Wei et al., 2015
							250	Daxiakou	Dienerian	379	150	0.83	Wei et al., 2015
							250	Daxiakou	Dienerian	135	38	0.17	Wei et al., 2015
							250	Daxiakou	Dienerian	466	236	0.65	Wei et al., 2015
							250	Daxiakou	Dienerian	657	600	0.19	Wei et al., 2015
							250	Daxiakou	Dienerian	77	4	0.14	Wei et al., 2015
							250	Daxiakou	Dienerian	813	582	0.49	Wei et al., 2015
							250	Daxiakou	Dienerian	92	11	0.19	Wei et al., 2015
							250	Daxiakou	Dienerian	44		0.35	Wei et al., 2015
							250	Daxiakou	Dienerian	66	4	0.15	Wei et al., 2015
							250	Daxiakou	Dienerian	95	10	0.15	Wei et al., 2015
							250	Daxiakou	Dienerian	483	256	0.65	Wei et al., 2015
							250	Daxiakou	Dienerian	199	65	0.21	Wei et al., 2015
							250	Daxiakou	Dienerian	140	52	0.12	Wei et al., 2015
							250	Daxiakou	Dienerian	476	254	1.22	Wei et al., 2015
							250	Daxiakou	Dienerian	207	58	0.38	Wei et al., 2015
							250	Daxiakou	Dienerian	97	21	0.14	Wei et al., 2015
							250	Daxiakou	Dienerian	450	233	0.48	Wei et al., 2015
							250	Daxiakou	Dienerian	94	41	0.14	Wei et al., 2015
							250	Daxiakou	Dienerian	503	280	0.6	Wei et al., 2015
							250	Daxiakou	Dienerian	467	238	0.66	Wei et al., 2015
							250	Daxiakou	Dienerian	459	229	0.36	Wei et al., 2015
							250	Daxiakou	Dienerian	93	13	0.13	Wei et al., 2015
							250	Daxiakou	Dienerian	200	69	0.35	Wei et al., 2015
							250	Daxiakou	Dienerian	67	3	0.13	Wei et al., 2015
							250	Daxiakou	Dienerian	86	12		Wei et al., 2015
							250	Daxiakou	Dienerian	441	271	0.33	Wei et al., 2015
							250	Daxiakou	Dienerian	59		0.08	Wei et al., 2015
							250	Daxiakou	Dienerian	418	185		Wei et al., 2015
							250	Daxiakou	Dienerian	78	23	0.1	Wei et al., 2015
							250	Daxiakou	Dienerian	102	8	0.12	Wei et al., 2015
							250	Daxiakou	Dienerian	136	5	0.15	Wei et al., 2015
							250	Daxiakou	Dienerian	225	73	0.28	Wei et al., 2015
							250	Daxiakou	Dienerian	75	6	0.15	Wei et al., 2015
							250	Daxiakou	Dienerian	357	158	0.64	Wei et al., 2015
							250	Daxiakou	Dienerian	55		0.35	Wei et al., 2015
							250	Daxiakou	Dienerian	222	52	0.36	Wei et al., 2015
							250	Daxiakou	Dienerian	324	105	0.54	Wei et al., 2015
							250	Daxiakou	Dienerian	162	45	0.2	Wei et al., 2015
							250	Daxiakou	Dienerian	87	3	0.14	Wei et al., 2015
							250	Daxiakou	Dienerian	290	91	0.5	Wei et al., 2015
							250	Daxiakou	Dienerian	41		0.18	Wei et al., 2015
							250	Daxiakou	Dienerian	49		0.13	Wei et al., 2015
							250	Daxiakou	Dienerian	351	188	0.2	Wei et al., 2015
							250	Daxiakou	Dienerian	87	5	0.14	Wei et al., 2015
							250	Daxiakou	Dienerian	136	13	0.27	Wei et al., 2015
							250	Daxiakou	Dienerian	125		0.26	Wei et al., 2015
							250	Daxiakou	Dienerian	451	397	0.15	Wei et al., 2015
							250	Daxiakou	Dienerian	306	119	0.23	Wei et al., 2015
							250	Daxiakou	Dienerian	514	305	1.03	Wei et al., 2015
							250	Daxiakou	Dienerian	76	7	0.14	Wei et al., 2015
							250	Daxiakou	Dienerian	87		0.15	Wei et al., 2015
							250	Daxiakou	Dienerian	482	242	0.45	Wei et al., 2015
							250	Daxiakou	Dienerian	150	103	0.14	Wei et al., 2015
							250	Daxiakou	Dienerian	299	153	0.34	Wei et al., 2015
							250	Daxiakou	Dienerian	86	23	0.14	Wei et al., 2015
							250	Daxiakou	Dienerian	190	61	0.56	Wei et al., 2015
							250	Daxiakou	Dienerian	261	221	0.24	Wei et al., 2015
							250	Daxiakou	Dienerian	460	244	0.12	Wei et al., 2015
							250	Daxiakou	Dienerian	49	12	0.17	Wei et al., 2015
							250	Daxiakou	Griesbachian	88	12	0.11	Wei et al., 2015
							250	Daxiakou	Griesbachian	150	109	0.15	Wei et al., 2015
							250	Daxiakou	Griesbachian	211	67	0.19	Wei et al., 2015
							250	Daxiakou	Griesbachian	499	292	1.08	Wei et al., 2015
							250	Daxiakou	Griesbachian	126	91	0.11	Wei et al., 2015
							250	Daxiakou	Griesbachian	65	19	0.08	Wei et al., 2015
							250	Daxiakou	Griesbachian	396	396	0.18	Wei et al., 2015
							250	Daxiakou	Griesbachian	452	237	0.44	Wei et al., 2015
							250	Daxiakou	Griesbachian	39	2	0.09	Wei et al., 2015
							250	Daxiakou	Griesbachian	1092	895	0.46	Wei et al., 2015
							250	Daxiakou	Griesbachian	198	85	0.11	Wei et al., 2015
							250	Daxiakou	Griesbachian	211	78	0.22	Wei et al., 2015
							250	Daxiakou	Griesbachian	205	78	0.3	Wei et al., 2015
							250	Daxiakou	Griesbachian	65	41	0.09	Wei et al., 2015
							250	Daxiakou	Griesbachian	105	11	0.08	Wei et al., 2015
							250	Daxiakou	Griesbachian	51	13	0.1	Wei et al., 2015
							250	Daxiakou	Griesbachian	252	199	0.1	Wei et al., 2015
							250	Daxiakou	Griesbachian	34	7	0.08	Wei et al., 2015
							250	Daxiakou	Griesbachian	85		0.29	Wei et al., 2015
							250	Daxiakou	Griesbachian	36	13	0.42	Wei et al., 2015
							250	Daxiakou	Griesbachian	163	13	0.3	Wei et al., 2015
							250	Daxiakou	Griesbachian	56	11	0.18	Wei et al., 2015
							250	Daxiakou	Griesbachian	220	28	0.26	Wei et al., 2015
							250	Daxiakou	Griesbachian	36	9	0.19	Wei et al., 2015
							250	Daxiakou	Griesbachian	43	16	0.19	Wei et al., 2015
							250	Daxiakou	Griesbachian	186	41	0.26	Wei et al., 2015
							250	Daxiakou	Griesbachian	45	13	0.17	Wei et al., 2015
							250	Daxiakou	Griesbachian	203	31	0.33	Wei et al., 2015
							250	Daxiakou	Griesbachian	35	20	0.35	Wei et al., 2015
							250	Daxiakou	Griesbachian	39	22	0.25	Wei et al., 2015
							250	Daxiakou	Griesbachian	296	72	0.69	Wei et al., 2015
							250	Daxiakou	Griesbachian	47	24	0.18	Wei et al., 2015
							250	Daxiakou	Griesbachian	250	40	0.44	Wei et al., 2015
							250	Daxiakou	Griesbachian	266	54	0.09	Wei et al., 2015
							250	Daxiakou	Griesbachian	36	4	0.46	Wei et al., 2015
							250	Daxiakou	Griesbachian	171	21	0.11	Wei et al., 2015
							250	Daxiakou	Griesbachian	36	19	0.22	Wei et al., 2015
							250	Daxiakou	Griesbachian	27	5	0.3	Wei et al., 2015
							250	Daxiakou	Griesbachian	39	21	0.09	Wei et al., 2015
							250	Daxiakou	Griesbachian	196	28	0.08	Wei et al., 2015
							250	Daxiakou	Griesbachian	35	15	0.1	Wei et al., 2015
							250	Daxiakou	Griesbachian	43	11	0.1	Wei et al., 2015
							250	Daxiakou	Griesbachian	44	2	0.08	Wei et al., 2015
							250	Daxiakou	Griesbachian	151		0.29	Wei et al., 2015
							250	Daxiakou	Griesbachian	201	5	0.42	Wei et al., 2015
							250	Daxiakou	Griesbachian	68	44	0.3	Wei et al., 2015
							250	Daxiakou	Griesbachian	305	70	0.18	Wei et al., 2015
							250	Daxiakou	Griesbachian	46	31	0.26	Wei et al., 2015
							250	Daxiakou	Griesbachian	50	27	0.19	Wei et al., 2015
							250	Daxiakou	Griesbachian	36	15	0.19	Wei et al., 2015
							250	Daxiakou	Griesbachian	39	19	0.26	Wei et al., 2015
							250	Daxiakou	Griesbachian	51	27	0.17	Wei et al., 2015
							250	Daxiakou	Griesbachian	55	20	0.33	Wei et al., 2015
							250	Daxiakou	Griesbachian	67	16	0.35	Wei et al., 2015
							250	Daxiakou	Griesbachian	186	17	0.25	Wei et al., 2015
							250	Daxiakou	Griesbachian	47	17	0.69	Wei et al., 2015
							250	Daxiakou	Griesbachian	40	18	0.17	Wei et al., 2015
							250	Daxiakou	Griesbachian	166	12	0.3	Wei et al., 2015
							250	Daxiakou	Griesbachian	49	31	1.26	Wei et al., 2015
							250	Daxiakou	Griesbachian	35	14	0.2	Wei et al., 2015
							250	Daxiakou	Griesbachian	231	44	0.34	Wei et al., 2015
							250	Daxiakou	Griesbachian	46	21	0.26	Wei et al., 2015
							250	Daxiakou	Griesbachian	41	17		Wei et al., 2015
							250	Daxiakou	Griesbachian	34	2	0.21	Wei et al., 2015
							250	Daxiakou	Griesbachian	235	47	0.26	Wei et al., 2015
							250	Daxiakou	Griesbachian	45	15	0.16	Wei et al., 2015
							250	Daxiakou	Griesbachian	44	18	0.15	Wei et al., 2015
							250	Daxiakou	Griesbachian	35	15	0.2	Wei et al., 2015
							250	Daxiakou	Griesbachian	38	11	0.27	Wei et al., 2015
							250	Daxiakou	Griesbachian	58	17	1.4	Wei et al., 2015
							250	Daxiakou	Griesbachian	47	30	0.19	Wei et al., 2015
							250	Daxiakou	Griesbachian	43	17	0.84	Wei et al., 2015
							250	Daxiakou	Griesbachian	35	15	0.11	Wei et al., 2015
							250	Daxiakou	Griesbachian	201	32	0.08	Wei et al., 2015
							250	Daxiakou	Griesbachian	31	16	0.11	Wei et al., 2015
							250	Daxiakou	Griesbachian	294	72	0.21	Wei et al., 2015
							250	Daxiakou	Griesbachian	57	7	0.16	Wei et al., 2015
							250	Daxiakou	Griesbachian	38	11	0.2	Wei et al., 2015
							250	Daxiakou	Griesbachian	42	25	0.2	Wei et al., 2015
							250	Daxiakou	Griesbachian	44	16	0.3	Wei et al., 2015
							250	Daxiakou	Griesbachian	45	25	0.19	Wei et al., 2015
							250	Daxiakou	Griesbachian	51	21	0.25	Wei et al., 2015
							250	Daxiakou	Griesbachian	47	29	0.14	Wei et al., 2015
							250	Daxiakou	Griesbachian	31	17	0.15	Wei et al., 2015
							250	Daxiakou	Griesbachian	42	17	0.16	Wei et al., 2015
							250	Daxiakou	Griesbachian	43	22	0.23	Wei et al., 2015
							250	Daxiakou	Griesbachian	33	15	0.19	Wei et al., 2015
							250	Daxiakou	Griesbachian	47	26	0.33	Wei et al., 2015
							250	Daxiakou	Griesbachian	35	21	0.16	Wei et al., 2015
							250	Daxiakou	Griesbachian	47	21	0.33	Wei et al., 2015
							250	Daxiakou	Griesbachian	319	89	0.24	Wei et al., 2015
							250	Daxiakou	Griesbachian	42	27	0.2	Wei et al., 2015
							250	Daxiakou	Griesbachian	39	25	0.21	Wei et al., 2015
							250	Daxiakou	Griesbachian	56	38	0.15	Wei et al., 2015
							250	Daxiakou	Griesbachian	249	56	0.13	Wei et al., 2015
							250	Daxiakou	Griesbachian	32	17	0.18	Wei et al., 2015
							250	Daxiakou	Griesbachian	127	106	0.18	Wei et al., 2015
							250	Daxiakou	Griesbachian	47	29	0.13	Wei et al., 2015
							250	Daxiakou	Griesbachian	34	17	0.27	Wei et al., 2015
							250	Daxiakou	Griesbachian	53	8	0.3	Wei et al., 2015
							250	Daxiakou	Griesbachian	46	4	0.82	Wei et al., 2015
							250	Daxiakou	Griesbachian	44	2	0.17	Wei et al., 2015
							250	Daxiakou	Griesbachian	49	13	0.15	Wei et al., 2015
							250	Daxiakou	Griesbachian	51	16	0.11	Wei et al., 2015
							250	Daxiakou	Griesbachian	67	24	0.18	Wei et al., 2015
							250	Daxiakou	Griesbachian	48	2	0.24	Wei et al., 2015
							250	Daxiakou	Griesbachian	64	9	0.21	Wei et al., 2015
							250	Daxiakou	Griesbachian	785	735		Wei et al., 2015
							250	Daxiakou	Griesbachian	67		0.23	Wei et al., 2015
							250	Daxiakou	Griesbachian	71		0.19	Wei et al., 2015
							250	Daxiakou	Griesbachian	950	865	0.19	Wei et al., 2015
							250	Daxiakou	Griesbachian	105	21	0.24	Wei et al., 2015
							250	Daxiakou	Griesbachian	87		0.11	Wei et al., 2015
							250	Daxiakou	Griesbachian	128	17	0.19	Wei et al., 2015
							250	Daxiakou	Griesbachian	196	83	0.17	Wei et al., 2015
							250	Daxiakou	Griesbachian	114		0.9	Wei et al., 2015
							250	Daxiakou	Griesbachian	154	90	0.19	Wei et al., 2015
							250	Daxiakou	Griesbachian	121	10		Wei et al., 2015
							250	Daxiakou	Griesbachian	122		0.34	Wei et al., 2015
							250	Daxiakou	Griesbachian	144	7	0.67	Wei et al., 2015
							250	Daxiakou	Griesbachian	308	195	0.16	Wei et al., 2015
							250	Daxiakou	Griesbachian	60		0.27	Wei et al., 2015
							250	Daxiakou	Griesbachian	266	100	0.14	Wei et al., 2015
							250	Daxiakou	Griesbachian	149	70	0.22	Wei et al., 2015
							250	Daxiakou	Griesbachian	241	97	0.2	Wei et al., 2015
							250	Daxiakou	Griesbachian	134	61	0.21	Wei et al., 2015
							250	Daxiakou	Griesbachian	198	98	0.14	Wei et al., 2015
							250	Daxiakou	Griesbachian	101	70	0.21	Wei et al., 2015
							250	Daxiakou	Griesbachian	100	78	0.17	Wei et al., 2015
							250	Daxiakou	Griesbachian	378	147	0.24	Wei et al., 2015
							250	Daxiakou	Changhsingian	150		0.39	Wei et al., 2015
							250	Daxiakou	Changhsingian	33	33	0.29	Wei et al., 2015
							250	Daxiakou	Changhsingian	284	131	0.08	Wei et al., 2015
							250	Daxiakou	Changhsingian	187	62	0.13	Wei et al., 2015
							250	Daxiakou	Changhsingian	204		0.09	Wei et al., 2015
							250	Daxiakou	Changhsingian	106	62	0.1	Wei et al., 2015
							250	Daxiakou	Changhsingian	98	97	0.09	Wei et al., 2015
							250	Daxiakou	Changhsingian	63		0.13	Wei et al., 2015
							250	Daxiakou	Changhsingian	150		0.12	Wei et al., 2015
							250	Daxiakou	Changhsingian	99			Wei et al., 2015
							250	Daxiakou	Changhsingian	291	50	0.22	Wei et al., 2015
							250	Daxiakou	Changhsingian	240		0.1	Wei et al., 2015
							250	Daxiakou	Changhsingian	209	62	0.13	Wei et al., 2015
							250	Daxiakou	Changhsingian	271	33	0.13	Wei et al., 2015
							250	Daxiakou	Changhsingian	259	113	0.12	Wei et al., 2015
							250	Daxiakou	Changhsingian	279	135	0.11	Wei et al., 2015
							250	Daxiakou	Changhsingian	248	94	0.07	Wei et al., 2015
							250	Daxiakou	Changhsingian	85		0.1	Wei et al., 2015
							250	Daxiakou	Changhsingian	281	134	0.13	Wei et al., 2015
							250	Daxiakou	Changhsingian	274	134	0.15	Wei et al., 2015
							250	Daxiakou	Changhsingian	67		0.09	Wei et al., 2015
							250	Daxiakou	Changhsingian	360	203	0.1	Wei et al., 2015
							250	Daxiakou	Changhsingian	334	175	0.07	Wei et al., 2015
							250	Daxiakou	Changhsingian	315	165	0.08	Wei et al., 2015
							250	Daxiakou	Changhsingian	273	140	0.14	Wei et al., 2015
							250	Daxiakou	Changhsingian	68	18	0.17	Wei et al., 2015
							250	Daxiakou	Changhsingian	77	13	0.17	Wei et al., 2015
							250	Daxiakou	Changhsingian	20		0.17	Wei et al., 2015
							250	Daxiakou	Changhsingian	311	97	0.12	Wei et al., 2015
							250	Daxiakou	Changhsingian	190	60	0.13	Wei et al., 2015
							250	Daxiakou	Changhsingian	21		0.08	Wei et al., 2015
							250	Daxiakou	Changhsingian	254	64	0.1	Wei et al., 2015
							250						Wei et al., 2015
							250	Zuodeng	Spathian	33	12	0.08	Wei et al., 2015
							250	Zuodeng	Spathian	86	26	0.08	Wei et al., 2015
							250	Zuodeng	Spathian	33	15	0.08	Wei et al., 2015
							250	Zuodeng	Spathian	56	19	0.09	Wei et al., 2015
							250	Zuodeng	Spathian	20	15	0.06	Wei et al., 2015
							250	Zuodeng	Spathian			0.09	Wei et al., 2015
							250	Zuodeng	Spathian	28	17	0.07	Wei et al., 2015
							250	Zuodeng	Spathian	66	0	0.09	Wei et al., 2015
							250	Zuodeng	Spathian	39	15	0.08	Wei et al., 2015
							250	Zuodeng	Spathian	17	8	0.09	Wei et al., 2015
							250	Zuodeng	Spathian	17	2	0.1	Wei et al., 2015
							250	Zuodeng	Spathian	142	0	0.11	Wei et al., 2015
							250	Zuodeng	Spathian	28	4	0.08	Wei et al., 2015
							250	Zuodeng	Spathian	79	33	0.11	Wei et al., 2015
							250	Zuodeng	Spathian	26	8	0.1	Wei et al., 2015
							250	Zuodeng	Spathian	163	104	0.11	Wei et al., 2015
							250	Zuodeng	Spathian	96	23	0.11	Wei et al., 2015
							250	Zuodeng	Spathian	181	124	0.11	Wei et al., 2015
							250	Zuodeng	Spathian	113	63	0.08	Wei et al., 2015
							250	Zuodeng	Spathian	413	299	0.14	Wei et al., 2015
							250	Zuodeng	Spathian	224	149	0.09	Wei et al., 2015
							250	Zuodeng	Spathian	115	69	0.09	Wei et al., 2015
							250	Zuodeng	Spathian	144	85	0.11	Wei et al., 2015
							250	Zuodeng	Spathian	329	252	0.12	Wei et al., 2015
							250	Zuodeng	Spathian	194	121	0.12	Wei et al., 2015
							250	Zuodeng	Spathian	1336	920	0.14	Wei et al., 2015
							250	Zuodeng	Spathian	55	16	0.13	Wei et al., 2015
							250	Zuodeng	Spathian	385	114	0.41	Wei et al., 2015
							250	Zuodeng	Spathian	47	20	0.15	Wei et al., 2015
							250	Zuodeng	Spathian	55	33	0.13	Wei et al., 2015
							250	Zuodeng	Spathian	76	76	0.1	Wei et al., 2015
							250	Zuodeng	Spathian	62	22	0.1	Wei et al., 2015
							250	Zuodeng	Spathian	31	1	0.07	Wei et al., 2015
							250	Zuodeng	Spathian	298	49	0.1	Wei et al., 2015
							250	Zuodeng	Spathian	58	20	0.08	Wei et al., 2015
							250	Zuodeng	Spathian	41	7	0.16	Wei et al., 2015
							250	Zuodeng	Spathian	86	34	0.07	Wei et al., 2015
							250	Zuodeng	Spathian	62	19	0.1	Wei et al., 2015
							250	Zuodeng	Spathian	61	22	0.12	Wei et al., 2015
							250	Zuodeng	Spathian	82	19	0.42	Wei et al., 2015
							250	Zuodeng	Spathian	50	17	0.09	Wei et al., 2015
							250	Zuodeng	Spathian	19	0	0.2	Wei et al., 2015
							250	Zuodeng	Spathian	195	11	0.4	Wei et al., 2015
							250	Zuodeng	Spathian	21	0	0.07	Wei et al., 2015
							250	Zuodeng	Spathian	358	358	0.09	Wei et al., 2015
							250	Zuodeng	Spathian	24	3	0.11	Wei et al., 2015
							250	Zuodeng	Spathian	22	3	0.08	Wei et al., 2015
							250	Zuodeng	Spathian	76	12	0.1	Wei et al., 2015
							250	Zuodeng	Spathian	40	11	0.11	Wei et al., 2015
							250	Zuodeng	Spathian	26	7	0.11	Wei et al., 2015
							250	Zuodeng	Spathian	23	15	0.11	Wei et al., 2015
							250	Zuodeng	Spathian	23	11	0.08	Wei et al., 2015
							250	Zuodeng	Spathian	23	3	0.09	Wei et al., 2015
							250	Zuodeng	Spathian	37	12	0.07	Wei et al., 2015
							250	Zuodeng	Spathian	25	11	0.07	Wei et al., 2015
							250	Zuodeng	Spathian	50	22	0.09	Wei et al., 2015
							250	Zuodeng	Spathian	14	3	0.08	Wei et al., 2015
							250	Zuodeng	Spathian	27	19	0.08	Wei et al., 2015
							250	Zuodeng	Spathian	17	2	0.06	Wei et al., 2015
							250	Zuodeng	Spathian	18	4	0.1	Wei et al., 2015
							250	Zuodeng	Spathian	17	3	0.08	Wei et al., 2015
							250	Zuodeng	Spathian	29	10	0.06	Wei et al., 2015
							250	Zuodeng	Spathian	18	1	0.12	Wei et al., 2015
							250	Zuodeng	Spathian	40	16	0.12	Wei et al., 2015
							250	Zuodeng	Spathian	21	8	0.06	Wei et al., 2015
							250	Zuodeng	Spathian	24	16	0.09	Wei et al., 2015
							250	Zuodeng	Spathian	41	22	0.11	Wei et al., 2015
							250	Zuodeng	Spathian	17	3	0.09	Wei et al., 2015
							250	Zuodeng	Spathian	32	15	0.11	Wei et al., 2015
							250	Zuodeng	Spathian	25	8	0.08	Wei et al., 2015
							250	Zuodeng	Spathian	23	10	0.1	Wei et al., 2015
							250	Zuodeng	Spathian	26	5	0.14	Wei et al., 2015
							250	Zuodeng	Spathian	72	35	0.08	Wei et al., 2015
							250	Zuodeng	Spathian	29	11	0.06	Wei et al., 2015
							250	Zuodeng	Spathian	71	27	0.11	Wei et al., 2015
							250	Zuodeng	Spathian	20	7	0.1	Wei et al., 2015
							250	Zuodeng	Spathian	32	15	0.09	Wei et al., 2015
							250	Zuodeng	Spathian	60	25	0.11	Wei et al., 2015
							250	Zuodeng	Spathian	51	17	0.08	Wei et al., 2015
							250	Zuodeng	Spathian	60	6	0.11	Wei et al., 2015
							250	Zuodeng	Spathian	37	10	0.09	Wei et al., 2015
							250	Zuodeng	Spathian	44	26	0.1	Wei et al., 2015
							250	Zuodeng	Spathian	26	14	0.08	Wei et al., 2015
							250	Zuodeng	Spathian	22	4	0.1	Wei et al., 2015
							250	Zuodeng	Spathian	35	22	0.18	Wei et al., 2015
							250	Zuodeng	Spathian	45	30	0.09	Wei et al., 2015
							250	Zuodeng	Spathian	46	21	0.09	Wei et al., 2015
							250	Zuodeng	Spathian	40	21	0.08	Wei et al., 2015
							250	Zuodeng	Spathian	25	7	0.09	Wei et al., 2015
							250	Zuodeng	Spathian	40	13	0.11	Wei et al., 2015
							250	Zuodeng	Spathian	20	3	0.1	Wei et al., 2015
							250	Zuodeng	Spathian			0.14	Wei et al., 2015
							250	Zuodeng	Spathian	214	0	0.11	Wei et al., 2015
							250	Zuodeng	Spathian	130	0	0.16	Wei et al., 2015
							250	Zuodeng	Spathian	44	0	0.11	Wei et al., 2015
							250	Zuodeng	Spathian	67	0	0.11	Wei et al., 2015
							250	Zuodeng	Spathian	48	0	0.11	Wei et al., 2015
							250	Zuodeng	Spathian	36	5	0.09	Wei et al., 2015
							250	Zuodeng	Spathian	45	19	0.11	Wei et al., 2015
							250	Zuodeng	Spathian	49	9	0.1	Wei et al., 2015
							250	Zuodeng	Spathian	35	20	0.15	Wei et al., 2015
							250	Zuodeng	Spathian	34	22	0.08	Wei et al., 2015
							250	Zuodeng	Spathian	37	25	0.09	Wei et al., 2015
							250	Zuodeng	Spathian	27	14	0.09	Wei et al., 2015
							250	Zuodeng	Spathian	41	19	0.07	Wei et al., 2015
							250	Zuodeng	Spathian	120	0	0.09	Wei et al., 2015
							250	Zuodeng	Smithian	39	23	0.11	Wei et al., 2015
							250	Zuodeng	Smithian	27	19	0.08	Wei et al., 2015
							250	Zuodeng	Smithian	46	29	0.08	Wei et al., 2015
							250	Zuodeng	Smithian	35	23	0.08	Wei et al., 2015
							250	Zuodeng	Smithian	46	22	0.1	Wei et al., 2015
							250	Zuodeng	Smithian	32	20	0.08	Wei et al., 2015
							250	Zuodeng	Smithian	37	1	0.1	Wei et al., 2015
							250	Zuodeng	Smithian	35	25	0.1	Wei et al., 2015
							250	Zuodeng	Smithian	57	22	0.11	Wei et al., 2015
							250	Zuodeng	Smithian	135	0	0.13	Wei et al., 2015
							250	Zuodeng	Smithian	193	0	0.11	Wei et al., 2015
							250	Zuodeng	Smithian	247	0	0.08	Wei et al., 2015
							250	Zuodeng	Smithian	788	216	0.1	Wei et al., 2015
							250	Zuodeng	Smithian	47	15	0.12	Wei et al., 2015
							250	Zuodeng	Smithian	38	11	0.27	Wei et al., 2015
							250	Zuodeng	Smithian	42	23	0.11	Wei et al., 2015
							250	Zuodeng	Smithian	45	22	0.11	Wei et al., 2015
							250	Zuodeng	Smithian	50	23	0.11	Wei et al., 2015
							250	Zuodeng	Smithian	37	32	0.12	Wei et al., 2015
							250	Zuodeng	Smithian	22	11	0.08	Wei et al., 2015
							250	Zuodeng	Smithian	35	21	0.1	Wei et al., 2015
							250	Zuodeng	Smithian	30	20	0.11	Wei et al., 2015
							250	Zuodeng	Smithian	26	20	0.11	Wei et al., 2015
							250	Zuodeng	Smithian	32	23	0.09	Wei et al., 2015
							250	Zuodeng	Smithian	61	28	0.1	Wei et al., 2015
							250	Zuodeng	Smithian	40	22	0.09	Wei et al., 2015
							250	Zuodeng	Smithian	38	20	0.09	Wei et al., 2015
							250	Zuodeng	Smithian	27	6	0.09	Wei et al., 2015
							250	Zuodeng	Smithian	44	28	0.1	Wei et al., 2015
							250	Zuodeng	Smithian	49	16	0.17	Wei et al., 2015
							250	Zuodeng	Smithian	67	13	0.16	Wei et al., 2015
							250	Zuodeng	Smithian	74	30	0.28	Wei et al., 2015
							250	Zuodeng	Smithian	67	9	0.13	Wei et al., 2015
							250	Zuodeng	Smithian	54	17	0.14	Wei et al., 2015
							250	Zuodeng	Smithian	69	20	0.08	Wei et al., 2015
							250	Zuodeng	Smithian	63	21	0.22	Wei et al., 2015
							250	Zuodeng	Smithian	68	15	0.1	Wei et al., 2015
							250	Zuodeng	Smithian	59	10	0.1	Wei et al., 2015
							250	Zuodeng	Dienerian	44	11	0.24	Wei et al., 2015
							250	Zuodeng	Dienerian	72	18	0.15	Wei et al., 2015
							250	Zuodeng	Dienerian	42	25	0.13	Wei et al., 2015
							250	Zuodeng	Dienerian	37	20	0.12	Wei et al., 2015
							250	Zuodeng	Dienerian	40	18	0.14	Wei et al., 2015
							250	Zuodeng	Dienerian	47	22	0.11	Wei et al., 2015
							250	Zuodeng	Dienerian	38	19	0.1	Wei et al., 2015
							250	Zuodeng	Dienerian	72	11	0.1	Wei et al., 2015
							250	Zuodeng	Dienerian	63	27	0.2	Wei et al., 2015
							250	Zuodeng	Dienerian	70	20	0.09	Wei et al., 2015
							250	Zuodeng	Dienerian	64	32	0.17	Wei et al., 2015
							250	Zuodeng	Dienerian	51	20	0.12	Wei et al., 2015
							250	Zuodeng	Dienerian	77	39	0.12	Wei et al., 2015
							250	Zuodeng	Dienerian	32	22	0.1	Wei et al., 2015
							250	Zuodeng	Dienerian	35	22	0.13	Wei et al., 2015
							250	Zuodeng	Dienerian	66	33	0.09	Wei et al., 2015
							250	Zuodeng	Dienerian	25	21	0.11	Wei et al., 2015
							250	Zuodeng	Dienerian	27	20	0.09	Wei et al., 2015
							250	Zuodeng	Dienerian	26	24	0.12	Wei et al., 2015
							250	Zuodeng	Dienerian	34	31	0.12	Wei et al., 2015
							250	Zuodeng	Dienerian	37	35	0.17	Wei et al., 2015
							250	Zuodeng	Dienerian	29	28	0.16	Wei et al., 2015
							250	Zuodeng	Dienerian	37	35	0.2	Wei et al., 2015
							250	Zuodeng	Dienerian	24	21	0.17	Wei et al., 2015
							250	Zuodeng	Dienerian	41	36	0.15	Wei et al., 2015
							250	Zuodeng	Dienerian	48	46	0.15	Wei et al., 2015
							250	Zuodeng	Dienerian	29	28	0.1	Wei et al., 2015
							250	Zuodeng	Dienerian	54	50	0.72	Wei et al., 2015
							250	Zuodeng	Dienerian	63	45	0.13	Wei et al., 2015
							250	Zuodeng	Dienerian	25	22	0.1	Wei et al., 2015
							250	Zuodeng	Dienerian	28	26	0.12	Wei et al., 2015
							250	Zuodeng	Dienerian	23	20	0.08	Wei et al., 2015
							250	Zuodeng	Dienerian	35	33	0.1	Wei et al., 2015
							250	Zuodeng	Dienerian	4	2	0.09	Wei et al., 2015
							250	Zuodeng	Dienerian	0		0.11	Wei et al., 2015
							250	Zuodeng	Dienerian	11	10	0.09	Wei et al., 2015
							250	Zuodeng	Dienerian	30	29	0.25	Wei et al., 2015
							250	Zuodeng	Dienerian	17	16	0.37	Wei et al., 2015
							250	Zuodeng	Dienerian	23	22	0.09	Wei et al., 2015
							250	Zuodeng	Dienerian	18	17	0.13	Wei et al., 2015
							250	Zuodeng	Dienerian	22	22	0.11	Wei et al., 2015
							250	Zuodeng	Dienerian	13	12	0.12	Wei et al., 2015
							250	Zuodeng	Dienerian	36	34	0.1	Wei et al., 2015
							250	Zuodeng	Dienerian	152	136	0.13	Wei et al., 2015
							250	Zuodeng	Dienerian	105	96	0.1	Wei et al., 2015
							250	Zuodeng	Dienerian	13	3	0.11	Wei et al., 2015
							250	Zuodeng	Dienerian	3	2	0.39	Wei et al., 2015
							250	Zuodeng	Dienerian	124	115	0.44	Wei et al., 2015
							250	Zuodeng	Dienerian	19	15	0.19	Wei et al., 2015
							250	Zuodeng	Dienerian		0	0.09	Wei et al., 2015
							250	Zuodeng	Dienerian	159	154	0.17	Wei et al., 2015
							250	Zuodeng	Dienerian	37	35	0.15	Wei et al., 2015
							250	Zuodeng	Dienerian	20	18	0.12	Wei et al., 2015
							250	Zuodeng	Dienerian	21	17	0.23	Wei et al., 2015
							250	Zuodeng	Dienerian	18	17	0.12	Wei et al., 2015
							250	Zuodeng	Dienerian	655	655	0.14	Wei et al., 2015
							250	Zuodeng	Dienerian	20	18	0.24	Wei et al., 2015
							250	Zuodeng	Dienerian	28	27	0.2	Wei et al., 2015
							250	Zuodeng	Dienerian	33	27	0.23	Wei et al., 2015
							250	Zuodeng	Dienerian	220	211	0.27	Wei et al., 2015
							250	Zuodeng	Dienerian	96	87	0.28	Wei et al., 2015
							250	Zuodeng	Dienerian	187	178	0.12	Wei et al., 2015
							250	Zuodeng	Dienerian	74	68	0.18	Wei et al., 2015
							250	Zuodeng	Dienerian	53	49	0.13	Wei et al., 2015
							250	Zuodeng	Dienerian	32	26	0.2	Wei et al., 2015
							250	Zuodeng	Dienerian	61	58	0.17	Wei et al., 2015
							250	Zuodeng	Dienerian	34	31	0.19	Wei et al., 2015
							250	Zuodeng	Dienerian	18	17	0.23	Wei et al., 2015
							250	Zuodeng	Dienerian	30	20	0.09	Wei et al., 2015
							250	Zuodeng	Dienerian	77	60	0.1	Wei et al., 2015
							250	Zuodeng	Dienerian	125	105	0.21	Wei et al., 2015
							250	Zuodeng	Dienerian	49	42	0.12	Wei et al., 2015
							250	Zuodeng	Dienerian	42	37	0.2	Wei et al., 2015
							250	Zuodeng	Dienerian	30	27	0.2	Wei et al., 2015
							250	Zuodeng	Griesbachian	20	19	0.13	Wei et al., 2015
							250	Zuodeng	Griesbachian	24	23	0.28	Wei et al., 2015
							250	Zuodeng	Griesbachian	22	22	0.11	Wei et al., 2015
							250	Zuodeng	Griesbachian	33	28	0.11	Wei et al., 2015
							250	Zuodeng	Griesbachian	25	23	0.13	Wei et al., 2015
							250	Zuodeng	Griesbachian	20	17	0.1	Wei et al., 2015
							250	Zuodeng	Griesbachian	15	12	0.17	Wei et al., 2015
							250	Zuodeng	Griesbachian	14	13	0.15	Wei et al., 2015
							250	Zuodeng	Griesbachian	32	31	0.1	Wei et al., 2015
							250	Zuodeng	Griesbachian	15	14	0.18	Wei et al., 2015
							250	Zuodeng	Griesbachian	25	16	0.11	Wei et al., 2015
							250	Zuodeng	Griesbachian	27	14	0.09	Wei et al., 2015
							250	Zuodeng	Griesbachian	1195	666	0.17	Wei et al., 2015
							250	Zuodeng	Griesbachian	22	14	0.14	Wei et al., 2015
							250	Zuodeng	Griesbachian	24	20	0.16	Wei et al., 2015
							250	Zuodeng	Griesbachian	23	19	0.24	Wei et al., 2015
							250	Zuodeng	Griesbachian	36	30	0.27	Wei et al., 2015
							250	Zuodeng	Griesbachian	20	13	0.18	Wei et al., 2015
							250	Zuodeng	Griesbachian	44	39	0.12	Wei et al., 2015
							250	Zuodeng	Griesbachian	27	24	0.31	Wei et al., 2015
							250	Zuodeng	Griesbachian	78	70	0.31	Wei et al., 2015
							250	Zuodeng	Griesbachian	38	23	0.08	Wei et al., 2015
							250	Zuodeng	Griesbachian	38	27	0.15	Wei et al., 2015
							250	Zuodeng	Griesbachian	31	27	0.18	Wei et al., 2015
							250	Zuodeng	Griesbachian	27	25	0.13	Wei et al., 2015
							250	Zuodeng	Griesbachian	21	20	0.88	Wei et al., 2015
							250	Zuodeng	Griesbachian	26	24	1.52	Wei et al., 2015
							250	Zuodeng	Griesbachian	23	22	0.15	Wei et al., 2015
							250	Zuodeng	Griesbachian	25	23	0.22	Wei et al., 2015
							250	Zuodeng	Griesbachian	7	6	0.16	Wei et al., 2015
							250	Zuodeng	Griesbachian	67	65	0.22	Wei et al., 2015
							250	Zuodeng	Griesbachian	19	17	0.14	Wei et al., 2015
							250	Zuodeng	Griesbachian	22	20	0.2	Wei et al., 2015
							250	Zuodeng	Griesbachian	35	31	0.1	Wei et al., 2015
							250	Zuodeng	Griesbachian	36	33	0.16	Wei et al., 2015
							250	Zuodeng	Griesbachian	37	34	0.16	Wei et al., 2015
							250	Zuodeng	Griesbachian	56	54	0.18	Wei et al., 2015
							250	Zuodeng	Griesbachian	34	26	0.13	Wei et al., 2015
							250	Zuodeng	Griesbachian	29	24	0.12	Wei et al., 2015
							250	Zuodeng	Griesbachian	41	34	0.13	Wei et al., 2015
							250	Zuodeng	Griesbachian	1115	653	0.06	Wei et al., 2015
							250	Zuodeng	Griesbachian	27	19	0.1	Wei et al., 2015
							250	Zuodeng	Griesbachian	28	23	0.13	Wei et al., 2015
							250	Zuodeng	Griesbachian	25	22	0.12	Wei et al., 2015
							250	Zuodeng	Griesbachian	32	29	0.13	Wei et al., 2015
							250	Zuodeng	Griesbachian	47	43	0.16	Wei et al., 2015
							250	Zuodeng	Griesbachian	56	52	0.19	Wei et al., 2015
							250	Zuodeng	Griesbachian	41	37	0.23	Wei et al., 2015
							250	Zuodeng	Griesbachian	58	55	0.14	Wei et al., 2015
							250	Zuodeng	Griesbachian	46	43	0.29	Wei et al., 2015
							250	Zuodeng	Griesbachian	53	48	0.41	Wei et al., 2015
							250	Zuodeng	Griesbachian	39	34		Wei et al., 2015
							250	Zuodeng	Griesbachian			0.17	Wei et al., 2015
							250	Zuodeng	Griesbachian			0.12	Wei et al., 2015
							250	Zuodeng	Griesbachian	67	43	0.15	Wei et al., 2015
							250	Zuodeng	Griesbachian			0.17	Wei et al., 2015
							250	Zuodeng	Griesbachian			0.27	Wei et al., 2015
							250	Zuodeng	Griesbachian			0.25	Wei et al., 2015
							250	Zuodeng	Griesbachian			0.19	Wei et al., 2015
							250	Zuodeng	Griesbachian	42	30	0.13	Wei et al., 2015
							250	Zuodeng	Griesbachian			0.25	Wei et al., 2015
							250	Zuodeng	Griesbachian			0.13	Wei et al., 2015
							250	Zuodeng	Griesbachian			0.1	Wei et al., 2015
							250	Zuodeng	Changhsingian	18	0	0.13	Wei et al., 2015
							250	Zuodeng	Changhsingian	14	13	0.12	Wei et al., 2015
							250	Zuodeng	Changhsingian	26	9	0.39	Wei et al., 2015
							250	Zuodeng	Changhsingian	10	23	0.12	Wei et al., 2015
							250	Zuodeng	Changhsingian	19	6	0.12	Wei et al., 2015
							250	Zuodeng	Changhsingian	107	11	0.14	Wei et al., 2015
							250	Zuodeng	Changhsingian	78	91	0.22	Wei et al., 2015
							250	Zuodeng	Changhsingian	12	65	0.16	Wei et al., 2015
							250	Zuodeng	Changhsingian	17	12	0.12	Wei et al., 2015
							250	Zuodeng	Changhsingian	38	17	0.15	Wei et al., 2015
							250	Zuodeng	Changhsingian	8	38		Wei et al., 2015
							250	Zuodeng	Changhsingian	18	7	0.14	Wei et al., 2015
							250	Zuodeng	Changhsingian	19	17	0.18	Wei et al., 2015
							250	Zuodeng	Changhsingian	24	18	0.18	Wei et al., 2015
							250	Zuodeng	Changhsingian	39	17	0.18	Wei et al., 2015
							250	Zuodeng	Changhsingian	35	38	0.15	Wei et al., 2015
							250	Zuodeng	Changhsingian	24	34	0.12	Wei et al., 2015
							250	Zuodeng	Changhsingian	57	24	0.17	Wei et al., 2015
							250	Zuodeng	Changhsingian	8	56	0.12	Wei et al., 2015
							250	Zuodeng	Changhsingian	31	6	0.19	Wei et al., 2015
							250	Zuodeng	Changhsingian	15	31	0.19	Wei et al., 2015
							250	Zuodeng	Changhsingian	24	14	0.21	Wei et al., 2015
							250	Zuodeng	Changhsingian	94	23	0.18	Wei et al., 2015
							250	Zuodeng	Changhsingian	81	85	0.24	Wei et al., 2015
							250	Zuodeng	Changhsingian	21	80	0.19	Wei et al., 2015
							250	Zuodeng	Changhsingian	7	18	0.17	Wei et al., 2015
							250	Zuodeng	Changhsingian	41	6	0.13	Wei et al., 2015
							250	Zuodeng	Changhsingian	70	32	0.17	Wei et al., 2015
							250	Zuodeng	Changhsingian	95	51	0.14	Wei et al., 2015
							250	Zuodeng	Changhsingian	44	64	0.17	Wei et al., 2015
							250	Zuodeng	Changhsingian	161	36	0.13	Wei et al., 2015
							250	Zuodeng	Changhsingian	44	122	0.15	Wei et al., 2015
							250	Zuodeng	Changhsingian	51	31	0.13	Wei et al., 2015
							250	Zuodeng	Changhsingian	33	37	0.13	Wei et al., 2015
							250	Zuodeng	Changhsingian	25	28	0.12	Wei et al., 2015
							250	Zuodeng	Changhsingian	31	18	0.18	Wei et al., 2015
							250	Zuodeng	Changhsingian	14	29	0.17	Wei et al., 2015
							250	Zuodeng	Changhsingian	21	11	0.1	Wei et al., 2015
							250	Zuodeng	Changhsingian	2	17	0.11	Wei et al., 2015
							250	Zuodeng	Changhsingian	24	0	0.1	Wei et al., 2015
							250	Zuodeng	Changhsingian	31	21	0.18	Wei et al., 2015
							250	Zuodeng	Changhsingian	27	26	0.19	Wei et al., 2015
							250	Zuodeng	Changhsingian	16	21	0.19	Wei et al., 2015
							250	Zuodeng	Changhsingian	17	14	0.25	Wei et al., 2015
							250	Zuodeng	Changhsingian	5	14	0.16	Wei et al., 2015
							250	Zuodeng	Changhsingian	17	3	0.25	Wei et al., 2015
							250	Zuodeng	Changhsingian	45	16	0.19	Wei et al., 2015
							250	Zuodeng	Changhsingian	29	33	0.23	Wei et al., 2015
							250	Zuodeng	Changhsingian	10	25	0.2	Wei et al., 2015
							250	Zuodeng	Changhsingian	25	8	0.16	Wei et al., 2015
							250	Zuodeng	Changhsingian	21	21	0.15	Wei et al., 2015
							250	Zuodeng	Changhsingian	33	10	0.15	Wei et al., 2015
							250	Zuodeng	Changhsingian	11	23	0.12	Wei et al., 2015
							250	Zuodeng	Changhsingian	10	6	0.11	Wei et al., 2015
							250	Zuodeng	Changhsingian	50	1	0.16	Wei et al., 2015
							250	Zuodeng	Changhsingian	25	42	0.16	Wei et al., 2015
							250	Zuodeng	Changhsingian	12	24	0.14	Wei et al., 2015
							250	Zuodeng	Changhsingian	12	8	0.21	Wei et al., 2015
							250	Zuodeng	Changhsingian	12	7	0.24	Wei et al., 2015
							250	Zuodeng	Changhsingian	28	10	0.24	Wei et al., 2015
							250	Zuodeng	Changhsingian	18	27	0.17	Wei et al., 2015
							250	Zuodeng	Changhsingian	21	16	0.17	Wei et al., 2015
							250	Zuodeng	Changhsingian	95	0	0.24	Wei et al., 2015
							250	Zuodeng	Changhsingian	121	81	0.23	Wei et al., 2015
							250	Zuodeng	Changhsingian	30	96	0.16	Wei et al., 2015
							250	Zuodeng	Changhsingian	37	22	0.15	Wei et al., 2015
							250	Zuodeng	Changhsingian	81	33	0.17	Wei et al., 2015
							250						Wei et al., 2015
							250	Mud	Spathian	62	0.1	0.16	Wei et al., 2015
							250	Mud	Spathian	694	275.99	0.17	Wei et al., 2015
							250	Mud	Spathian	134	22.91	0.09	Wei et al., 2015
							250	Mud	Spathian	732	326.37	2.71	Wei et al., 2015
							250	Mud	Spathian	69	0.1	0.1	Wei et al., 2015
							250	Mud	Spathian	678	276.89	0.22	Wei et al., 2015
							250	Mud	Spathian	88	0.1	0.12	Wei et al., 2015
							250	Mud	Spathian	53	6.32	0.1	Wei et al., 2015
							250	Mud	Smithian	123	31.74	0.12	Wei et al., 2015
							250	Mud	Smithian	46	8.07	0.13	Wei et al., 2015
							250	Mud	Smithian	221	141.16	0.12	Wei et al., 2015
							250	Mud	Smithian	1059	1013.22	0.16	Wei et al., 2015
							250	Mud	Smithian	109	22.06	0.11	Wei et al., 2015
							250	Mud	Smithian	20	7.98	0.11	Wei et al., 2015
							250	Mud	Smithian	100	45.5	0.1	Wei et al., 2015
							250	Mud	Smithian	214	200.26	0.11	Wei et al., 2015
							250	Mud	Smithian	62	21.82	0.1	Wei et al., 2015
							250	Mud	Smithian	104	45.59	0.11	Wei et al., 2015
							250	Mud	Smithian	42	0.1	0.13	Wei et al., 2015
							250	Mud	Smithian	91	15.06	0.1	Wei et al., 2015
							250	Mud	Smithian	65	39.61	0.08	Wei et al., 2015
							250	Mud	Smithian	146	48.42	0.12	Wei et al., 2015
							250	Mud	Smithian	75	38.9	0.13	Wei et al., 2015
							250	Mud	Smithian	85	40.76	0.1	Wei et al., 2015
							250	Mud	Smithian	930	909.04	0.11	Wei et al., 2015
							250	Mud	Smithian	94	31.54	0.11	Wei et al., 2015
							250	Mud	Smithian	10	2.28	0.12	Wei et al., 2015
							250	Mud	Smithian	177	92.33	0.13	Wei et al., 2015
							250	Mud	Smithian	36	13.12	0.12	Wei et al., 2015
							250	Mud	Smithian	15	8.91	0.11	Wei et al., 2015
							250	Mud	Smithian	13	11.72	0.15	Wei et al., 2015
							250	Mud	Smithian	171	87.13	0.14	Wei et al., 2015
							250	Mud	Smithian	134	53.4	0.13	Wei et al., 2015
							250	Mud	Smithian	146	73.09	0.1	Wei et al., 2015
							250	Mud	Smithian	41	19.03	0.14	Wei et al., 2015
							250	Mud	Smithian	169	77.1	0.11	Wei et al., 2015
							250	Mud	Smithian	35	15.99	0.16	Wei et al., 2015
							250	Mud	Smithian	260	149.38	0.12	Wei et al., 2015
							250	Mud	Smithian	302	247.34	0.16	Wei et al., 2015
							250	Mud	Smithian	160	85.29	0.13	Wei et al., 2015
							250	Mud	Smithian	156	65.32	0.09	Wei et al., 2015
							250	Mud	Smithian	1085	1039.22	0.14	Wei et al., 2015
							250	Mud	Smithian	81	29.24	0.1	Wei et al., 2015
							250	Mud	Smithian	1098	703.82	1.2	Wei et al., 2015
							250	Mud	Smithian	123	34.97	0.11	Wei et al., 2015
							250	Mud	Smithian	1791	1722.83	0.2	Wei et al., 2015
							250	Mud	Smithian	141	34.13	0.09	Wei et al., 2015
							250	Mud	Smithian	46	17.12	0.14	Wei et al., 2015
							250	Mud	Smithian	62	6.46	0.09	Wei et al., 2015
							250	Mud	Smithian	45	31.29	0.14	Wei et al., 2015
							250	Mud	Smithian	112	33.93	0.1	Wei et al., 2015
							250	Mud	Smithian	89	12.64	0.1	Wei et al., 2015
							250	Mud	Smithian	114	11.86	0.11	Wei et al., 2015
							250	Mud	Smithian	6	0.1	0.12	Wei et al., 2015
							250	Mud	Smithian	84	0.6	0.13	Wei et al., 2015
							250	Mud	Smithian	60	3.89	0.11	Wei et al., 2015
							250	Mud	Smithian	38	9.86	0.15	Wei et al., 2015
							250	Mud	Smithian	120	13.18	0.11	Wei et al., 2015
							250	Mud	Smithian	155	15.92	0.11	Wei et al., 2015
							250	Mud	Smithian	143	9.49	0.15	Wei et al., 2015
							250	Mud	Smithian	117	3.76	0.13	Wei et al., 2015
							250	Mud	Smithian	92	0.37	0.17	Wei et al., 2015
							250	Mud	Smithian	109	6.33	0.11	Wei et al., 2015
							250	Mud	Smithian	106	2.71	0.16	Wei et al., 2015
							250	Mud	Smithian	118	15.56	0.13	Wei et al., 2015
							250	Mud	Smithian	182	41.44	0.11	Wei et al., 2015
							250	Mud	Smithian	177	24.34	0.14	Wei et al., 2015
							250	Mud	Smithian	90	13.65	0.13	Wei et al., 2015
							250	Mud	Smithian	77	12.05	0.11	Wei et al., 2015
							250	Mud	Smithian	62	0.1	0.11	Wei et al., 2015
							250	Mud	Smithian	113	0.1	0.18	Wei et al., 2015
							250	Mud	Smithian	91	0.1	0.1	Wei et al., 2015
							250	Mud	Smithian	87	0.1	0.13	Wei et al., 2015
							250	Mud	Smithian	918	485.83	0.42	Wei et al., 2015
							250	Mud	Smithian	416	51.45	0.27	Wei et al., 2015
							250	Mud	Dienerian	325	281	0.13	Wei et al., 2015
							250	Mud	Dienerian	826	407.15	0.52	Wei et al., 2015
							250	Mud	Dienerian	626	255.84	1.77	Wei et al., 2015
							250	Mud	Dienerian	187	96.63	0.57	Wei et al., 2015
							250	Mud	Dienerian	1038	628.07	1.8	Wei et al., 2015
							250	Mud	Dienerian	723	355.23	1.52	Wei et al., 2015
							250	Mud	Dienerian	659	287.6	0.26	Wei et al., 2015
							250	Mud	Dienerian	42	34.67	0.23	Wei et al., 2015
							250	Mud	Dienerian	257	218.86	0.57	Wei et al., 2015
							250	Mud	Dienerian	813	434.1	0.29	Wei et al., 2015
							250	Mud	Dienerian	831	453.62	1.84	Wei et al., 2015
							250	Mud	Dienerian	732	374.47	0.51	Wei et al., 2015
							250	Mud	Dienerian	98	0.1	0.4	Wei et al., 2015
							250	Mud	Dienerian	653	316.3	2.44	Wei et al., 2015
							250	Mud	Dienerian	792	405.75	2.06	Wei et al., 2015
							250	Mud	Dienerian	830	443.7	2.33	Wei et al., 2015
							250	Mud	Dienerian	622	231.46	1.88	Wei et al., 2015
							250	Mud	Dienerian	112	27.2	0.12	Wei et al., 2015
							250	Mud	Dienerian	663	329.3	0.92	Wei et al., 2015
							250	Mud	Dienerian	59	43.6	0.26	Wei et al., 2015
							250	Mud	Dienerian	740	361.58	0.59	Wei et al., 2015
							250	Mud	Dienerian	829	428.83	2.03	Wei et al., 2015
							250	Mud	Dienerian	789	402.46	1.11	Wei et al., 2015
							250	Mud	Dienerian	61	33.56	0.13	Wei et al., 2015
							250	Mud	Dienerian	681	303.02	0.86	Wei et al., 2015
							250	Mud	Dienerian	83	42.53	0.22	Wei et al., 2015
							250	Mud	Dienerian	654	305.06	0.87	Wei et al., 2015
							250	Mud	Dienerian	566	226.18	1.69	Wei et al., 2015
							250	Mud	Dienerian	118	75.45	0.1	Wei et al., 2015
							250	Mud	Dienerian	235	195.33	0.35	Wei et al., 2015
							250	Mud	Dienerian	170	0.1	0.12	Wei et al., 2015
							250	Mud	Dienerian	672	353.57	0.88	Wei et al., 2015
							250	Mud	Griesbachian	136	119.56	0.15	Wei et al., 2015
							250	Mud	Griesbachian	143	0.1	0.14	Wei et al., 2015
							250	Mud	Griesbachian	981	522.74	0.3	Wei et al., 2015
							250	Mud	Griesbachian	411	407.87	0.15	Wei et al., 2015
							250	Mud	Griesbachian	60	0.1	0.13	Wei et al., 2015
							250	Mud	Griesbachian	35	21.89	0.23	Wei et al., 2015
							250	Mud	Griesbachian	52	36.03	0.13	Wei et al., 2015
							250	Mud	Wuchiapingian	243	0.1	0.5	Wei et al., 2015
							250	Mud	Wuchiapingian	144	56.07	0.12	Wei et al., 2015
							250	Mud	Wuchiapingian	826	392.42	0.49	Wei et al., 2015
							250	Mud	Wuchiapingian	610	201.57	0.42	Wei et al., 2015
							250	Mud	Wuchiapingian	597	147.63	0.49	Wei et al., 2015
							250	Mud	Wuchiapingian	475	157.58	0.66	Wei et al., 2015
							250	Mud	Wuchiapingian	752	319.44	0.37	Wei et al., 2015
							250	Mud	Wuchiapingian	577	138.34	0.96	Wei et al., 2015
							250	Mud	Wuchiapingian	642	237.11	1.37	Wei et al., 2015
							250	Mud	Wuchiapingian	460	45.18	1.71	Wei et al., 2015
							250	Mud	Wuchiapingian	680	265.33	1.31	Wei et al., 2015
							250	Mud	Wuchiapingian	595	199.12	0.74	Wei et al., 2015
							250	Mud	Wuchiapingian	639	239.48	0.56	Wei et al., 2015
							250	Mud	Wuchiapingian	580	193.63	1.92	Wei et al., 2015
							250	Mud	Wuchiapingian	575	205.27	1.65	Wei et al., 2015
							250	Mud	Wuchiapingian	594	199.16	1.98	Wei et al., 2015
							250	Mud	Wuchiapingian	614	232.36	1.49	Wei et al., 2015
							250	Mud	Wuchiapingian	642	384.95	0.86	Wei et al., 2015
							250	Mud	Wuchiapingian	497	119.63	0.51	Wei et al., 2015
							250	Mud	Wuchiapingian	545	127.82	2.13	Wei et al., 2015
							250	Mud	Wuchiapingian	628	233	1.9	Wei et al., 2015
Shen, J., Schoepfer, S. D., Feng, Q. L., Zhou, L., Yu, J. X., Song, H. Y., Wei, H. Y. and Algeo, T. J., 2015. Marine productivity changes during the end-Permian crisis and Early Triassic recovery. Earth-Science Reviews 149, 136-162.
Wei, H., Shen, J., Schoepfer, S. D., Krystyn, L., Richoz, S. and Algeo, T. J., 2015. Environmental controls on marine ecosystem recovery following mass extinctions, with an example from the Early Triassic. Earth-Science Reviews 149, 108-135.

## Sheet: Ordovician-Silurian
Time bin (Ma)	Formation	TOC	Al	Ba	Baexcess	Reference
		%	%	ppm	ppm
444	Longmachi, Chongqing drillcore	1.11	9.33353	2266.04	1551.68	Liu et al., 2017
444	Longmachi, Chongqing drillcore	0.60984	2.39294	1647.26	1464.11	Liu et al., 2017
444	Longmachi, Chongqing drillcore	0.849202	9.82059	865.471	113.835	Liu et al., 2017
444	Longmachi, Chongqing drillcore	0.935397	10.1912	2880.31	2100.31	Liu et al., 2017
444	Longmachi, Chongqing drillcore	0.770538	9.84706	2501.29	1747.63	Liu et al., 2017
444	Longmachi, Chongqing drillcore	0.680463	9.91059	2783.8	2025.28	Liu et al., 2017
444	Longmachi, Chongqing drillcore	0.693652	9.96353	2787.59	2025.01	Liu et al., 2017
444	Longmachi, Chongqing drillcore	0.852384	9.90529	2757	1998.88	Liu et al., 2017
444	Longmachi, Chongqing drillcore	1.33127	8.82	2685.77	2010.71	Liu et al., 2017
444	Longmachi, Chongqing drillcore	1.36524	9.91059	2774.69	2016.16	Liu et al., 2017
444	Longmachi, Chongqing drillcore	1.56044	9.99529	2915.32	2150.32	Liu et al., 2017
444	Longmachi, Chongqing drillcore	1.89812	9.65118	2558.7	1820.03	Liu et al., 2017
444	Longmachi, Chongqing drillcore	1.48268	9.53471	2682.8	1953.05	Liu et al., 2017
444	Longmachi, Chongqing drillcore	1.939	9.59824	2636.11	1901.49	Liu et al., 2017
444	Longmachi, Chongqing drillcore	2.87419	9.61941	2847.18	2110.94	Liu et al., 2017
444	Longmachi, Chongqing drillcore	1.85592	9.65118	2623.01	1884.34	Liu et al., 2017
444	Longmachi, Chongqing drillcore	1.19617	9.39706	2835.87	2116.64	Liu et al., 2017
444	Longmachi, Chongqing drillcore	1.60831	8.73	2459.25	1791.09	Liu et al., 2017
444	Longmachi, Chongqing drillcore	1.91852	8.52882	2604.62	1951.85	Liu et al., 2017
444	Longmachi, Chongqing drillcore	2.40884	8.19	2507.51	1880.67	Liu et al., 2017
444	Longmachi, Chongqing drillcore	2.63846	7.04647	2215.57	1676.25	Liu et al., 2017
444	Longmachi, Chongqing drillcore	2.70145	5.10353	2040.42	1649.81	Liu et al., 2017
444	Longmachi, Chongqing drillcore	2.66049	2.17059	6379.23	6213.1	Liu et al., 2017
444	Longmachi, Chongqing drillcore	2.2518	7.94647	2598.48	1990.29	Liu et al., 2017
444	Longmachi, Chongqing drillcore	1.98333	7.94118	2402.99	1795.19	Liu et al., 2017
444	Longmachi, Chongqing drillcore	2.11518	8.74588	2579.03	1909.65	Liu et al., 2017
444	Longmachi, Chongqing drillcore	2.08712	8.1	4087.49	3467.54	Liu et al., 2017
444	Longmachi, Chongqing drillcore	2.21589	8.52353	2453.26	1800.9	Liu et al., 2017
444	Longmachi, Chongqing drillcore	2.42546	8.32235	2419.46	1782.49	Liu et al., 2017
444	Longmachi, Chongqing drillcore	2.26558	8.43353	2938.61	2293.14	Liu et al., 2017
444	Longmachi, Chongqing drillcore	1.92539	3.39353	1833.82	1574.09	Liu et al., 2017
444	Longmachi, Chongqing drillcore	2.0375	7.24765	3919.21	3364.5	Liu et al., 2017
444	Longmachi, Chongqing drillcore	2.32726	8.37	2597.96	1957.34	Liu et al., 2017
444	Longmachi, Chongqing drillcore	2.56755	9.21706	2816.39	2110.94	Liu et al., 2017
444	Longmachi, Chongqing drillcore	2.3135	9.01588	2914.28	2224.23	Liu et al., 2017
444	Longmachi, Chongqing drillcore	1.49913	9.36	2775.91	2059.52	Liu et al., 2017
444	Longmachi, Chongqing drillcore	1.28767	9.22765	3030.65	2324.4	Liu et al., 2017
444	Longmachi, Chongqing drillcore	1.415	9.29647	3125.97	2414.45	Liu et al., 2017
444	Longmachi, Chongqing drillcore	1.58336	9.38647	3488.47	2770.06	Liu et al., 2017
444	Longmachi, Chongqing drillcore	1.556	8.42294	5340.19	4695.53	Liu et al., 2017
444	Longmachi, Chongqing drillcore	1.48153	8.55529	9313.08	8658.28	Liu et al., 2017
444	Longmachi, Chongqing drillcore	1.49429	9.11647	3688.75	2991.01	Liu et al., 2017
444	Longmachi, Chongqing drillcore	1.61834	10.0324	4486.64	3718.79	Liu et al., 2017
444	Longmachi, Chongqing drillcore	1.5362	7.24765	2198.88	1644.16	Liu et al., 2017
444	Longmachi, Chongqing drillcore	1.57875	8.38059	2750.23	2108.81	Liu et al., 2017
444	Longmachi, Chongqing drillcore	1.55884	7.49647	2195.84	1622.08	Liu et al., 2017
444	Longmachi, Chongqing drillcore	1.7025	7.19471	2062.49	1511.83	Liu et al., 2017
444	Longmachi, Chongqing drillcore	1.62367	7.07294	1995.57	1454.23	Liu et al., 2017
444	Longmachi, Chongqing drillcore	1.56677	7.15765	2065.32	1517.5	Liu et al., 2017
444	Longmachi, Chongqing drillcore	1.77216	7.27941	2212.64	1655.49	Liu et al., 2017
444	Longmachi, Chongqing drillcore	1.72535	7.14176	2007.4	1460.8	Liu et al., 2017
444	Longmachi, Chongqing drillcore	1.57105	5.96118	2005.66	1549.41	Liu et al., 2017
444	Longmachi, Chongqing drillcore	1.875	7.2	2227.92	1676.85	Liu et al., 2017
444	Longmachi, Chongqing drillcore	2.05583	6.81882	2078.67	1556.78	Liu et al., 2017
444	Longmachi, Chongqing drillcore	1.8376	7.04118	2052.1	1513.19	Liu et al., 2017
444	Longmachi, Chongqing drillcore	1.65638	7.35882	2183.3	1620.08	Liu et al., 2017
444	Longmachi, Chongqing drillcore	1.99618	7.38	2330.25	1765.41	Liu et al., 2017
444	Longmachi, Chongqing drillcore	2.14	7.16294	2054.11	1505.88	Liu et al., 2017
444	Longmachi, Chongqing drillcore	2.09042	7.03588	2264.73	1726.22	Liu et al., 2017
444	Longmachi, Chongqing drillcore	1.97136	7.17882	2188.02	1638.58	Liu et al., 2017
444	Longmachi, Chongqing drillcore	1.51444	7.02	2123.84	1586.55	Liu et al., 2017
444	Longmachi, Chongqing drillcore	1.15085	5.57471	1968.14	1541.47	Liu et al., 2017
444	Longmachi, Chongqing drillcore	1.70795	6.92471	2236.12	1706.13	Liu et al., 2017
444	Longmachi, Chongqing drillcore	1.63634	7.14176	2241.5	1694.89	Liu et al., 2017
444	Longmachi, Chongqing drillcore	1.62666	7.15765	2173.56	1625.74	Liu et al., 2017
444	Longmachi, Chongqing drillcore	1.77823	6.84	2264.67	1741.16	Liu et al., 2017
444	Longmachi, Chongqing drillcore	1.57181	6.53824	1897.21	1396.79	Liu et al., 2017
444	Longmachi, Chongqing drillcore	1.46245	6.78176	2086.77	1567.72	Liu et al., 2017
444	Longmachi, Chongqing drillcore	1.56289	6.60706	2131.29	1625.61	Liu et al., 2017
444	Longmachi, Chongqing drillcore	1.62768	6.77647	1930.03	1411.38	Liu et al., 2017
444	Longmachi, Chongqing drillcore	1.45481	5.82882	2116.57	1670.45	Liu et al., 2017
444	Longmachi, Chongqing drillcore	1.40824	7.54412	2710.11	2132.71	Liu et al., 2017
444	Longmachi, Chongqing drillcore	1.63725	7.38	2234.7	1669.86	Liu et al., 2017
444	Longmachi, Chongqing drillcore	1.39871	8.30118	2715.71	2080.36	Liu et al., 2017
444	Longmachi, Chongqing drillcore	1.43385	6.64941	2127.43	1618.51	Liu et al., 2017
444	Longmachi, Chongqing drillcore	1.64662	7.52824	2122.55	1546.36	Liu et al., 2017
444	Longmachi, Chongqing drillcore	1.79487	7.45941	2057.63	1486.71	Liu et al., 2017
444	Longmachi, Chongqing drillcore	1.64454	7.67647	2269.26	1681.72	Liu et al., 2017
444	Longmachi, Chongqing drillcore	1.59594	7.67647	2275.15	1687.61	Liu et al., 2017
444	Longmachi, Chongqing drillcore	2.00195	7.55471	2252.96	1674.75	Liu et al., 2017
444	Longmachi, Chongqing drillcore	2.18104	6.05118	1935.52	1472.38	Liu et al., 2017
444	Longmachi, Chongqing drillcore	2.48767	8.06294	2600.89	1983.78	Liu et al., 2017
444	Longmachi, Chongqing drillcore	2.64755	7.63941	2191.47	1606.77	Liu et al., 2017
444	Longmachi, Chongqing drillcore	2.83814	11.6576	4143.18	3250.94	Liu et al., 2017
444	Longmachi, Chongqing drillcore	3.11693	9.03176	2903.9	2212.64	Liu et al., 2017
444	Longmachi, Chongqing drillcore	3.03508	7.83	2215.92	1616.64	Liu et al., 2017
444	Longmachi, Chongqing drillcore	2.7548	7.59176	2070.46	1489.41	Liu et al., 2017
444	Longmachi, Chongqing drillcore	2.31637	7.61294	2228.93	1646.26	Liu et al., 2017
444	Longmachi, Chongqing drillcore	2.98388	5.99294	2043.74	1585.06	Liu et al., 2017
444	Longmachi, Chongqing drillcore	3.15274	9.01059	3141.76	2452.12	Liu et al., 2017
444	Longmachi, Chongqing drillcore	3.32257	7.49647	2298.71	1724.96	Liu et al., 2017
444	Longmachi, Chongqing drillcore	3.39625	7.26353	2332.48	1776.55	Liu et al., 2017
444	Longmachi, Chongqing drillcore	3.39306	7.21059	2241.7	1689.82	Liu et al., 2017
444	Longmachi, Chongqing drillcore	3.53219	7.08353	2267.84	1725.69	Liu et al., 2017
444	Longmachi, Chongqing drillcore	3.55783	7.27412	2362.45	1805.71	Liu et al., 2017
444	Longmachi, Chongqing drillcore	3.61333	7.27412	2240.71	1683.97	Liu et al., 2017
444	Longmachi, Chongqing drillcore	3.68836	6.90882	2239.98	1711.2	Liu et al., 2017
444	Longmachi, Chongqing drillcore	3.73794	6.96176	2201.93	1669.1	Liu et al., 2017
444	Longmachi, Chongqing drillcore	3.96419	6.96706	2259.97	1726.73	Liu et al., 2017
444	Longmachi, Chongqing drillcore	3.96833	6.91412	2252.33	1723.14	Liu et al., 2017
444	Longmachi, Chongqing drillcore	3.46733	5.95059	2050.26	1594.82	Liu et al., 2017
444	Longmachi, Chongqing drillcore	3.41055	5.76529	2044.1	1602.85	Liu et al., 2017
444	Longmachi, Chongqing drillcore	3.40879	4.98176	1790.07	1408.78	Liu et al., 2017
444	Longmachi, Chongqing drillcore	3.29288	5.97706	2280.71	1823.24	Liu et al., 2017
444	Longmachi, Chongqing drillcore	3.04053	6.19412	2144.33	1670.25	Liu et al., 2017
444	Longmachi, Chongqing drillcore	1.90318	5.77059	2048.99	1607.32	Liu et al., 2017
444	Longmachi, Chongqing drillcore	3.30303	4.20353	1574.15	1252.42	Liu et al., 2017
444	Longmachi, Chongqing drillcore	3.43821	5.28882	1939.94	1535.15	Liu et al., 2017
444	Longmachi, Chongqing drillcore	3.07862	4.97118	1707.41	1326.93	Liu et al., 2017
444	Longmachi, Chongqing drillcore	2.49845	5.28353	2130.13	1725.75	Liu et al., 2017
444	Longmachi, Chongqing drillcore	2.52187	6.61765	2104.54	1598.05	Liu et al., 2017
444	Longmachi, Chongqing drillcore	2.59654	7.13118	2815.53	2269.73	Liu et al., 2017
444	Longmachi, Chongqing drillcore	2.55687	4.86	1874.54	1502.57	Liu et al., 2017
444	Longmachi, Chongqing drillcore	2.64505	6.22059	2049.85	1573.74	Liu et al., 2017
444	Longmachi, Chongqing drillcore	2.7649	7.10471	2284.18	1740.41	Liu et al., 2017
444	Longmachi, Chongqing drillcore	2.75049	6.77647	2253.9	1735.25	Liu et al., 2017
444	Longmachi, Chongqing drillcore	2.43103	6.26294	478.763	0	Liu et al., 2017
444	Longmachi, Chongqing drillcore	2.73697	5.98235	2045.2	1587.33	Liu et al., 2017
444	Longmachi, Chongqing drillcore	3.27941	8.28529	3185.98	2551.85	Liu et al., 2017
444	Longmachi, Chongqing drillcore	3.2989	5.82882	2399.79	1953.67	Liu et al., 2017
444	Longmachi, Chongqing drillcore	3.82969	6.54882	2275.42	1774.2	Liu et al., 2017
444	Longmachi, Chongqing drillcore	3.98548	6.28412	3765.92	3284.95	Liu et al., 2017
444	Longmachi, Chongqing drillcore	4.13708	6.23118	2097.56	1620.64	Liu et al., 2017
444	Longmachi, Chongqing drillcore	4.35906	6.55941	2102.31	1600.27	Liu et al., 2017
444	Longmachi, Chongqing drillcore	4.47013	5.51118			Liu et al., 2017
444	Longmachi, Chongqing drillcore	5.07406	6.00882	2323.6	1863.7	Liu et al., 2017
444	Longmachi, Chongqing drillcore	4.26715	5.68588	1430.05	994.866	Liu et al., 2017
444	Longmachi, Chongqing drillcore	4.35085	4.04471	2121.09	1811.53	Liu et al., 2017
444	Longmachi, Chongqing drillcore	4.07435	5.26765	2206.14	1802.97	Liu et al., 2017
444	Longmachi, Chongqing drillcore	3.26202	5.51647	2102.08	1679.86	Liu et al., 2017
444	Longmachi, Chongqing drillcore	3.77375	5.09824			Liu et al., 2017
444	Longmachi, Chongqing drillcore	3.43788	4.91294	2077.47	1701.44	Liu et al., 2017
444	Longmachi, Chongqing drillcore	4.135	4.91294	2040.51	1664.49	Liu et al., 2017
444	Longmachi, Chongqing drillcore	4.48969	4.79647	1811.3	1444.19	Liu et al., 2017
444	Longmachi, Chongqing drillcore	4.37613	4.61647	2085.15	1731.82	Liu et al., 2017
444	Longmachi, Chongqing drillcore	4.61259	4.61647	2074.31	1720.99	Liu et al., 2017
444	Longmachi, Chongqing drillcore	4.7853	5.11412	2126.75	1735.33	Liu et al., 2017
444	Longmachi, Chongqing drillcore	4.40519	4.74353	2153.97	1790.92	Liu et al., 2017
444	Longmachi, Chongqing drillcore	3.93714	3.73765	1730.48	1444.42	Liu et al., 2017
444	Longmachi, Chongqing drillcore	2.93703	5.00294	1950.86	1567.95	Liu et al., 2017
444	Longmachi, Chongqing drillcore	3.22394	5.03471	2078.96	1693.62	Liu et al., 2017
444	Longmachi, Chongqing drillcore	3.12	5.04	2251.08	1865.34	Liu et al., 2017
444	Longmachi, Chongqing drillcore	2.22438	3.98647	2020.73	1715.62	Liu et al., 2017
444	Longmachi, Chongqing drillcore	2.615	4.40471	2114.55	1777.43	Liu et al., 2017
444	Longmachi, Chongqing drillcore	3.18926	3.93882	1980.2	1678.73	Liu et al., 2017
444	Longmachi, Chongqing drillcore	3.57909	3.74294	1813.06	1526.58	Liu et al., 2017
444	Longmachi, Chongqing drillcore	3.92577	5.54294	2221.2	1796.96	Liu et al., 2017
444	Longmachi, Chongqing drillcore	4.2792	4.22471	2074.72	1751.37	Liu et al., 2017
444	Longmachi, Chongqing drillcore	4.8678	3.35647	1509.28	1252.38	Liu et al., 2017
444	Longmachi, Chongqing drillcore	4.79345	5.47412	2796.93	2377.96	Liu et al., 2017
444	Longmachi, Chongqing drillcore	4.27405	3.44647	1402.27	1138.48	Liu et al., 2017
444	Longmachi, Chongqing drillcore	4.58143	2.70529	1243.33	1036.27	Liu et al., 2017
444	Longmachi, Chongqing drillcore	4.53107	6.57529	2528.19	2024.94	Liu et al., 2017
444	Longmachi, Chongqing drillcore	4.36313	6.43235	2000.08	1507.76	Liu et al., 2017
444	Longmachi, Chongqing drillcore	5.16212	7.69765	2319.57	1730.42	Liu et al., 2017
444	Longmachi, Wangjiawan section	2.4	6.69	894	381.969	Zhou et al., 2015
444	Longmachi, Wangjiawan section	2.58	6.8	1580	1059.55	Zhou et al., 2015
444	Longmachi, Wangjiawan section	4.2	4.48	1010	667.115	Zhou et al., 2015
444	Longmachi, Wangjiawan section	4.2	4.47	916	573.881	Zhou et al., 2015
444	Longmachi, Wangjiawan section	3.64	3.93	928	627.21	Zhou et al., 2015
444	Longmachi, Wangjiawan section	5.31	6.15	887	416.299	Zhou et al., 2015
444	Longmachi, Wangjiawan section	7.18	4.11	1057	742.434	Zhou et al., 2015
444	Longmachi, Wangjiawan section	7.2	2.77	1421	1208.99	Zhou et al., 2015
444	Longmachi, Wangjiawan section	4.15	3.89	1276	978.272	Zhou et al., 2015
444	Longmachi, Wangjiawan section	2.93	6.28	1234	753.349	Zhou et al., 2015
444	Longmachi, Wangjiawan section	1.74	3.89	1540	1242.27	Zhou et al., 2015
444	Longmachi, Wangjiawan section	0.35	1.99	1699	1546.69	Zhou et al., 2015
444	Kuangyinchiao, Wangjiawan section	0.6	14.54	6032	4919.15	Zhou et al., 2015
444	Kuangyinchiao, Wangjiawan section	0.62	6.23	5943	5466.18	Zhou et al., 2015
444	Kuangyinchiao, Wangjiawan section	0.55	3.5	1131	863.121	Zhou et al., 2015
444	Kuangyinchiao, Wangjiawan section	6.65	4.06	1416	1105.26	Zhou et al., 2015
444	Kuangyinchiao, Wangjiawan section	7.72	3.46	1350	1085.18	Zhou et al., 2015
444	Kuangyinchiao, Wangjiawan section	7.65	4.17	1064	744.842	Zhou et al., 2015
444	Kuangyinchiao, Wangjiawan section	7.69	3.65	1059	779.641	Zhou et al., 2015
444	Kuangyinchiao, Wangjiawan section	4.98	5.57	970	543.69	Zhou et al., 2015
444	Kuangyinchiao, Wangjiawan section	5.76	1.33	852	750.206	Zhou et al., 2015
444	Wufeng, Wangjiawan section	4.71	3.52	895	625.59	Zhou et al., 2015
444	Wufeng, Wangjiawan section	2.86	2.87	812	592.339	Zhou et al., 2015
444	Wufeng, Wangjiawan section	2.68	5.33	1107	699.059	Zhou et al., 2015
444	Wufeng, Wangjiawan section	3.45	4.21	948	625.78	Zhou et al., 2015
444	Wufeng, Wangjiawan section	4.98	4.94	899	520.908	Zhou et al., 2015
444	Wufeng, Wangjiawan section	4.98	5.21	813	414.243	Zhou et al., 2015
444	Longmachi, Nanbazi section	5.18	7.03	412	0	Zhou et al., 2015
444	Longmachi, Nanbazi section	5.72	6.73	412	0	Zhou et al., 2015
444	Longmachi, Nanbazi section	4.74	5.25	322	0	Zhou et al., 2015
444	Longmachi, Nanbazi section	5.06	7.65	397	0	Zhou et al., 2015
444	Kuangyinchiao, Nanbazi section	4.95	6.72	391	0	Zhou et al., 2015
444	Kuangyinchiao, Nanbazi section	4.21	0.3	52	29.039	Zhou et al., 2015
444	Kuangyinchiao, Nanbazi section	4.74	1.11	92	7.04416	Zhou et al., 2015
444	Kuangyinchiao, Nanbazi section	5.25	5.73	317	0	Zhou et al., 2015
444	Kuangyinchiao, Nanbazi section	10.42	5.22	298	0	Zhou et al., 2015
444	Kuangyinchiao, Nanbazi section	6.62	6.17	326	0	Zhou et al., 2015
444	Kuangyinchiao, Nanbazi section	1.98	2.51	184	0	Zhou et al., 2015
444	Wufeng, Nanbazi section	1.23	5.14	306	0	Zhou et al., 2015
444	Wufeng, Nanbazi section	1.57	5.19	287	0	Zhou et al., 2015
444	Wufeng, Nanbazi section	0.38	2.64	212	9.94286	Zhou et al., 2015
444	Wufeng, Nanbazi section	1.76	2.87	225	5.33939	Zhou et al., 2015
444	Wufeng, Nanbazi section	0.56	1.8	135	0	Zhou et al., 2015
444	Wufeng, Nanbazi section	0.14	3.67	218	0	Zhou et al., 2015
444	Wufeng, Nanbazi section	0.09	4.77	600	234.919	Zhou et al., 2015
444	Wufeng, Nanbazi section	2.14	3.69	276	0	Zhou et al., 2015
444	Wufeng, Nanbazi section	0.47	3.3	277	24.4286	Zhou et al., 2015
444	Wufeng, Nanbazi section	0.51	3.62	299	21.9368	Zhou et al., 2015
444	Wufeng, Nanbazi section	1.31	4.9	350	0	Zhou et al., 2015
444	Longmachi, Tianba section	4.5	5.38	2353.58	1941.81	Qiu et al., 2017
444	Longmachi, Tianba section	4.2	6.05	2094.84	1631.79	Qiu et al., 2017
444	Longmachi, Tianba section	5.3	6.75	2221.79	1705.17	Qiu et al., 2017
444	Longmachi, Tianba section	8.4	10.08	3120.46	2348.97	Qiu et al., 2017
444	Longmachi, Tianba section	6.5	6.74	2542.11	2026.25	Qiu et al., 2017
444	Longmachi, Tianba section	6.1	6.23	1917.8	1440.98	Qiu et al., 2017
444	Longmachi, Tianba section	6.4	5.22	1946.54	1547.02	Qiu et al., 2017
444	Longmachi, Tianba section	5.7	8.61	2908.79	2249.81	Qiu et al., 2017
444	Longmachi, Tianba section	8	8.95	2641.44	1956.44	Qiu et al., 2017
444	Kuangyinchiao, Tianba section	1.8	3.67	1504.89	1224	Qiu et al., 2017
444	Kuangyinchiao, Tianba section	1.2	2.87	1380.72	1161.06	Qiu et al., 2017
444	Kuangyinchiao, Tianba section	0.6	6.12	1754.25	1285.84	Qiu et al., 2017
444	Wufeng, section	6.9	4.98	2377.13	1995.98	Qiu et al., 2017
444	Wufeng, section	7.2	6.5	2869.24	2371.75	Qiu et al., 2017
444	Wufeng, section	5.9	6.8	2180.5	1660.05	Qiu et al., 2017
444	Wufeng, section	3.3	3.56	1527.8	1255.33	Qiu et al., 2017
444	Wufeng, section	4.6	7.39	2879.28	2313.67	Qiu et al., 2017
444	Wufeng, section	1.4	1.82	1650.22	1510.92	Qiu et al., 2017
444	Wufeng, section	1.4	1.69	1679.17	1549.82	Qiu et al., 2017
444	Wufeng, section	1.6	1.89	908.4	763.745	Qiu et al., 2017
444	Wufeng, section	4.2	6.54	1798.56	1298.01	Qiu et al., 2017
444	Wufeng, section	1.6	10.98	3204.48	2364.11	Qiu et al., 2017
444	Wufeng, section	0.9	1.5	3204.71	3089.9	Qiu et al., 2017
444	Wufeng, section	1	4.43	1609.24	1270.18	Qiu et al., 2017
444	Wufeng, section	2.6	6.98	1715.1	1180.87	Qiu et al., 2017
444	Wufeng, section	1.7	3.97	1020.33	716.479	Qiu et al., 2017
444	Wufeng, section	4.4	12	2200.3	1281.86	Qiu et al., 2017
444	Longmachi, Hehua section	8.66	4.28	1373.51	1045.93	Yan et al., 2015
444	Longmachi, Hehua section	10.29	4.84	1404.59	1034.15	Yan et al., 2015
444	Longmachi, Hehua section	10.85	5.57	2029.36	1603.05	Yan et al., 2015
444	Longmachi, Hehua section	8.04	7.77	2445.93	1851.24	Yan et al., 2015
444	Longmachi, Hehua section	5.08	6.95	2173.76	1641.83	Yan et al., 2015
444	Longmachi, Hehua section	5.34	7.11	2542.43	1998.25	Yan et al., 2015
444	Longmachi, Hehua section	6	4.25	1261.85	936.569	Yan et al., 2015
444	Longmachi, Hehua section	6.92	4.82	1282.14	913.233	Yan et al., 2015
444	Longmachi, Hehua section	6.06	5.38	1603.01	1191.24	Yan et al., 2015
444	Longmachi, Hehua section	6.54	6	1765.34	1306.12	Yan et al., 2015
444	Longmachi, Hehua section	6.42	6.94	2018.43	1487.26	Yan et al., 2015
444	Longmachi, Hehua section	5.94	5.86	1464.43	1015.92	Yan et al., 2015
444	Longmachi, Hehua section	5.1	7.32	2274.28	1714.03	Yan et al., 2015
444	Longmachi, Hehua section	4.96	7.18	2447.95	1898.42	Yan et al., 2015
444	Longmachi, Hehua section	5.06	6.63	1427.16	919.721	Yan et al., 2015
444	Longmachi, Hehua section	4.82	2.14	2011.24	1847.45	Yan et al., 2015
444	Longmachi, Hehua section	4.81	6.25	1287.02	808.665	Yan et al., 2015
444	Longmachi, Hehua section	3.4	6.97	966.05	432.589	Yan et al., 2015
444	Longmachi, Hehua section	3.2	2.97	1465.88	1238.57	Yan et al., 2015
444	Longmachi, Hehua section	3.46	8.48	1521.84	872.808	Yan et al., 2015
444	Longmachi, Hehua section	4.5	9.03	1697.62	1006.49	Yan et al., 2015
444	Longmachi, Hehua section	3	7.38	1877.31	1312.47	Yan et al., 2015
444	Longmachi, Hehua section	4.2	0.86	889.65	823.828	Yan et al., 2015
444	Longmachi, Hehua section	4.3	1.72	576.65	445.007	Yan et al., 2015
444	Longmachi, Hehua section	5.2	4.12	1125.65	810.318	Yan et al., 2015
444	Longmachi, Hehua section	4.9	1.65	696.96	570.674	Yan et al., 2015
444	Longmachi, Hehua section	4.92	2.59	1358.56	1160.33	Yan et al., 2015
444	Maquoketa Formation, Iowa, USA		9.32	1591.02	877.445	Wei and Algeo, 2020
444	Maquoketa Formation, Iowa, USA		7.4	1433.91	867.336	Wei and Algeo, 2020
444	Maquoketa Formation, Iowa, USA		8.38	1619.47	977.862	Wei and Algeo, 2020
444	Maquoketa Formation, Iowa, USA		10.81	1793.54	965.876	Wei and Algeo, 2020
444	Maquoketa Formation, Iowa, USA		9.02	2089.85	1399.24	Wei and Algeo, 2020
444	Maquoketa Formation, Iowa, USA		7.27	1602.87	1046.25	Wei and Algeo, 2020
444	Maquoketa Formation, Iowa, USA		5.42	1128.56	713.582	Wei and Algeo, 2020
444	Maquoketa Formation, Iowa, USA		8.2	1998.51	1370.68	Wei and Algeo, 2020
444	Maquoketa Formation, Iowa, USA		6.57	1785.04	1282.02	Wei and Algeo, 2020
444	Maquoketa Formation, Iowa, USA		7.97	2162.72	1552.5	Wei and Algeo, 2020
444	Maquoketa Formation, Iowa, USA		6.21	1705.55	1230.09	Wei and Algeo, 2020
444	Maquoketa Formation, Iowa, USA		10.24	3202.74	2418.72	Wei and Algeo, 2020
444	Maquoketa Formation, Iowa, USA		10.35	2971.31	2178.87	Wei and Algeo, 2020
444	Maquoketa Formation, Iowa, USA		13.95	1997.94	929.869	Wei and Algeo, 2020
444	Maquoketa Formation, Iowa, USA		8.31	3222.82	2586.57	Wei and Algeo, 2020
444	Maquoketa Formation, Iowa, USA		8.56	2245.16	1589.76	Wei and Algeo, 2020
444	Maquoketa Formation, Iowa, USA		9.07	2510.01	1815.57	Wei and Algeo, 2020
444	Maquoketa Formation, Iowa, USA		17.95	4933.08	3558.75	Wei and Algeo, 2020
444	Maquoketa Formation, Iowa, USA		11.31	2506.08	1640.13	Wei and Algeo, 2020
444	Maquoketa Formation, Iowa, USA		14.76	3445.06	2314.97	Wei and Algeo, 2020
444	Maquoketa Formation, Iowa, USA		12.83	2847.51	1865.19	Wei and Algeo, 2020
444	Maquoketa Formation, Iowa, USA		18.31	2917.19	1515.29	Wei and Algeo, 2020
444	Maquoketa Formation, Iowa, USA		12.51	2933.67	1975.85	Wei and Algeo, 2020
444	Maquoketa Formation, Iowa, USA		13.13	3132.46	2127.17	Wei and Algeo, 2020
444	Maquoketa Formation, Iowa, USA		13.48	3243.3	2211.21	Wei and Algeo, 2020
444	Maquoketa Formation, Iowa, USA		13.98	3034.53	1964.16	Wei and Algeo, 2020
444	Maquoketa Formation, Iowa, USA		13.8	3662.63	2606.04	Wei and Algeo, 2020
444	Maquoketa Formation, Iowa, USA		14.65	3656.3	2534.63	Wei and Algeo, 2020
444	Maquoketa Formation, Iowa, USA		14.24	3303.03	2212.75	Wei and Algeo, 2020
444	Maquoketa Formation, Iowa, USA		14.03	3120.07	2045.88	Wei and Algeo, 2020
444	Maquoketa Formation, Iowa, USA		14.32	3721.97	2625.56	Wei and Algeo, 2020
444	Maquoketa Formation, Iowa, USA		14.15	3313.81	2230.43	Wei and Algeo, 2020
444	Maquoketa Formation, Iowa, USA		15.01	4151.72	3002.49	Wei and Algeo, 2020
444	Maquoketa Formation, Iowa, USA		15.82	4104.62	2893.37	Wei and Algeo, 2020
444	Maquoketa Formation, Iowa, USA		16.27	4793.18	3547.48	Wei and Algeo, 2020
444	Maquoketa Formation, Iowa, USA		17	4205.22	2903.63	Wei and Algeo, 2020
444	Maquoketa Formation, Iowa, USA		11.75	4531.33	3631.7	Wei and Algeo, 2020
444	Maquoketa Formation, Iowa, USA		16.77	4839.69	3555.71	Wei and Algeo, 2020
444	Maquoketa Formation, Iowa, USA		14.53	4354.29	3241.81	Wei and Algeo, 2020
Liu, Z., Algeo, T. J., Guo, X., Fan, J., Du, X. and Lu, Y., 2017. Paleo-environmental cyclicity in the Early Silurian Yangtze Sea (South China): Tectonic or glacio-eustatic control? Palaeogeography, Palaeoclimatology, Palaeoecology 466, 59-76.
Zhou, L., Algeo, T. J., Shen, J., Hu, Z., Gong, H., Xie, S., Huang, J. and Gao, S., 2015. Changes in marine productivity and redox conditions during the Late Ordovician Hirnantian glaciation. Palaeogeography, Palaeoclimatology, Palaeoecology 420, 223-234.
Qiu, Z., Jiang, Z., Dong, D., Shi, Z., Lu, B., Tan, X., Zhou, J., Lei, D., Liang, P., Wei, H., 2017. Organic matter enrichment model of the shale in Wufeng-Longmachi formation of Wuxi area. Journal of China University of Mining & Technology 46(5), 1134-1143.
Yan, D., Wang, H., Fu, Q., Chen, Z., He, J. and Gao, Z., 2015. Geochemical characteristics in the Longmaxi Formation (Early Silurian) of South China: Implications for organic matter accumulation. Marine and Petroleum Geology 65, 290-301.
Wei, W. and Algeo, T. J., 2020. Secular variation in the elemental composition of marine shales since 840 Ma: Tectonic and seawater influences. Geochim. Cosmochim. Acta 287, 367-390.

## Sheet: Devonian
Time bin (Ma)	Formation	TOC	Al	Ba	Babio	log(Babio)	Reference
380	Chenango County			775	219.343		Niu et al., 2016
380	Chenango County			1214	658.343		Niu et al., 2016
380	Chenango County			2218	1662.34		Niu et al., 2016
380	Chenango County			1759	1203.34		Niu et al., 2016
380	Chenango County			1480	924.343		Niu et al., 2016
380	Chenango County			1529	973.343		Niu et al., 2016
380	Chenango County			1795	1239.34		Niu et al., 2016
380	Chenango County			1357	801.343		Niu et al., 2016
380	Chenango County			1487	931.343		Niu et al., 2016
380	Chenango County			1893	1337.34		Niu et al., 2016
380	Chenango County			1105	549.343		Niu et al., 2016
380	Chenango County			1848	1292.34		Niu et al., 2016
380	Chenango County			1580	1024.34		Niu et al., 2016
380	Chenango County			1998	1442.34		Niu et al., 2016
380	Chenango County			2083	1527.34		Niu et al., 2016
380	Chenango County			1811	1255.34		Niu et al., 2016
380	Chenango County			2071	1515.34		Niu et al., 2016
380	Chenango County			5643	5087.34		Niu et al., 2016
380	Chenango County			1522	966.343		Niu et al., 2016
380	Chenango County			1894	1338.34		Niu et al., 2016
380	Chenango County			3452	2896.34		Niu et al., 2016
380	Chenango County			1429	873.343		Niu et al., 2016
380	Chenango County			996	440.343		Niu et al., 2016
380	Chenango County			4142	3586.34		Niu et al., 2016
380	Chenango County			824	268.343		Niu et al., 2016
380	Chenango County			617	61.3429		Niu et al., 2016
380	Chenango County			13222	12666.3		Niu et al., 2016
380	Chenango County			721	165.343		Niu et al., 2016
380	Chenango County			747	191.343		Niu et al., 2016
380	Chenango County			727	171.343		Niu et al., 2016
380	Chenango County			845	289.343		Niu et al., 2016
380	Chenango County			1431	875.343		Niu et al., 2016
380	Chenango County			2847	2291.34		Niu et al., 2016
380	Chenango County			3790	3234.34		Niu et al., 2016
380	Chenango County			2459	1903.34		Niu et al., 2016
380	Chenango County			3069	2513.34		Niu et al., 2016
380	Chenango County			3003	2447.34		Niu et al., 2016
380	Chenango County			1917	1361.34		Niu et al., 2016
380	Chenango County			3398	2842.34		Niu et al., 2016
380	Chenango County			4089	3533.34		Niu et al., 2016
380	Chenango County			434	0		Niu et al., 2016
380	Chenango County			493	0		Niu et al., 2016
380	Chenango County			357	0		Niu et al., 2016
380	Chenango County			516	0		Niu et al., 2016
380	Chenango County			507	0		Niu et al., 2016
380	Chenango County			500	0		Niu et al., 2016
380	Chenango County			571	15.3429		Niu et al., 2016
380	Chenango County			595	39.3429		Niu et al., 2016
380	Chenango County			513	0		Niu et al., 2016
380	Chenango County			332	0		Niu et al., 2016
380	Chenango County			578	22.3429		Niu et al., 2016
380	Chenango County			205	0		Niu et al., 2016
380	Chenango County			537	0		Niu et al., 2016
380	Chenango County			1090	534.343		Niu et al., 2016
380	Chenango County			1113	557.343		Niu et al., 2016
380	Chenango County			806	250.343		Niu et al., 2016
380	Chenango County			531	0		Niu et al., 2016
380	Chenango County			933	377.343		Niu et al., 2016
380	Chenango County			950	394.343		Niu et al., 2016
380	Chenango County			12605	12049.3		Niu et al., 2016
380	Chenango County			990	434.343		Niu et al., 2016
380	Chenango County			925	369.343		Niu et al., 2016
380	Chenango County			1006	450.343		Niu et al., 2016
380	Chenango County			3970	3414.34		Niu et al., 2016
380	Chenango County			919	363.343		Niu et al., 2016
380	Chenango County			1220	664.343		Niu et al., 2016
380	Chenango County			2030	1474.34		Niu et al., 2016
380	Chenango County			1083	527.343		Niu et al., 2016
380	Chenango County			2459	1903.34		Niu et al., 2016
380	Chenango County			726	170.343		Niu et al., 2016
380	Chenango County			954	398.343		Niu et al., 2016
380	Chenango County			942	386.343		Niu et al., 2016
380	Chenango County			4020	3464.34		Niu et al., 2016
380	Chenango County			1229	673.343		Niu et al., 2016
380	Chenango County			937	381.343		Niu et al., 2016
380	Chenango County			1270	714.343		Niu et al., 2016
380	Chenango County			1249	693.343		Niu et al., 2016
380	Chenango County			1431	875.343		Niu et al., 2016
380	Chenango County			2398	1842.34		Niu et al., 2016
380	Chenango County			969	413.343		Niu et al., 2016
380	Chenango County			1237	681.343		Niu et al., 2016
380	Chenango County			771	215.343		Niu et al., 2016
380	Chenango County			802	246.343		Niu et al., 2016
380	Chenango County			766	210.343		Niu et al., 2016
380	Chenango County			922	366.343		Niu et al., 2016
380	Chenango County			788	232.343		Niu et al., 2016
380	Chenango County			689	133.343		Niu et al., 2016
380	Chenango County			988	432.343		Niu et al., 2016
380	Chenango County			743	187.343		Niu et al., 2016
380	Chenango County			938	382.343		Niu et al., 2016
380	Chenango County			947	391.343		Niu et al., 2016
380	Chenango County			1285	729.343		Niu et al., 2016
380	Chenango County			1137	581.343		Niu et al., 2016
380	Chenango County			981	425.343		Niu et al., 2016
380	Chenango County			782	226.343		Niu et al., 2016
380	Chenango County			1000	444.343		Niu et al., 2016
380	Chenango County			751	195.343		Niu et al., 2016
380	Chenango County			727	171.343		Niu et al., 2016
380	Chenango County			632	76.3429		Niu et al., 2016
380	Chenango County			645	89.3429		Niu et al., 2016
380	Chenango County			674	118.343		Niu et al., 2016
380	Chenango County			770	214.343		Niu et al., 2016
380	Chenango County			479	0		Niu et al., 2016
380	Chenango County			756	200.343		Niu et al., 2016
380	Chenango County			800	244.343		Niu et al., 2016
380	Chenango County			698	142.343		Niu et al., 2016
380	Chenango County			647	91.3429		Niu et al., 2016
380	Chenango County			1128	572.343		Niu et al., 2016
380	Chenango County			1417	861.343		Niu et al., 2016
380	Chenango County			749	193.343		Niu et al., 2016
380	Chenango County			703	147.343		Niu et al., 2016
380	Chenango County			715	159.343		Niu et al., 2016
380	Chenango County			573	17.3429		Niu et al., 2016
380	Chenango County			499	0		Niu et al., 2016
380	Chenango County			708	152.343		Niu et al., 2016
380	Chenango County			1076	520.343		Niu et al., 2016
380	Chenango County			722	166.343		Niu et al., 2016
380	Chenango County			696	140.343		Niu et al., 2016
380	Chenango County			703	147.343		Niu et al., 2016
380	Chenango County			737	181.343		Niu et al., 2016
380	Chenango County			737	181.343		Niu et al., 2016
380	Chenango County			727	171.343		Niu et al., 2016
380	Chenango County			711	155.343		Niu et al., 2016
380	Chenango County			419	0		Niu et al., 2016
380	Chenango County			758	202.343		Niu et al., 2016
380	Chenango County			695	139.343		Niu et al., 2016
380	Chenango County			729	173.343		Niu et al., 2016
380	Chenango County			674	118.343		Niu et al., 2016
380	Chenango County			696	140.343		Niu et al., 2016
380	Chenango County			654	98.3429		Niu et al., 2016
380	Chenango County			631	75.3429		Niu et al., 2016
380	Chenango County			622	66.3429		Niu et al., 2016
380	Chenango County			705	149.343		Niu et al., 2016
380	Chenango County			735	179.343		Niu et al., 2016
380	Chenango County			651	95.3429		Niu et al., 2016
380	Chenango County			704	148.343		Niu et al., 2016
380	Chenango County			735	179.343		Niu et al., 2016
380	Chenango County			837	281.343		Niu et al., 2016
380	Chenango County			1198	642.343		Niu et al., 2016
380	Chenango County			808	252.343		Niu et al., 2016
380	Chenango County			756	200.343		Niu et al., 2016
380	Chenango County			786	230.343		Niu et al., 2016
380	Chenango County			1914	1358.34		Niu et al., 2016
380	Chenango County			1504	948.343		Niu et al., 2016
380	Chenango County			1769	1213.34		Niu et al., 2016
380	Chenango County			979	423.343		Niu et al., 2016
380	Chenango County			735	179.343		Niu et al., 2016
380	Chenango County			702	146.343		Niu et al., 2016
380	Chenango County			804	248.343		Niu et al., 2016
380	Chenango County			738	182.343		Niu et al., 2016
380	Chenango County			699	143.343		Niu et al., 2016
380	Chenango County			690	134.343		Niu et al., 2016
380	Chenango County			742	186.343		Niu et al., 2016
380	Chenango County			927	371.343		Niu et al., 2016
380	Chenango County			675	119.343		Niu et al., 2016
380	Chenango County			677	121.343		Niu et al., 2016
380	Chenango County			677	121.343		Niu et al., 2016
380	Chenango County			1361	805.343		Niu et al., 2016
380	Chenango County			398	0		Niu et al., 2016
380	Chenango County			866	310.343		Niu et al., 2016
380	Chenango County			850	294.343		Niu et al., 2016
380	Chenango County			999	443.343		Niu et al., 2016
380	Chenango County			840	284.343		Niu et al., 2016
380	Chenango County			1481	925.343		Niu et al., 2016
380	Chenango County			1228	672.343		Niu et al., 2016
380	Chenango County			755	199.343		Niu et al., 2016
380	Chenango County			778	222.343		Niu et al., 2016
380	Chenango County			1321	765.343		Niu et al., 2016
380	Chenango County			1001	445.343		Niu et al., 2016
380	Chenango County			825	269.343		Niu et al., 2016
380	Chenango County			704	148.343		Niu et al., 2016
380	Chenango County			897	341.343		Niu et al., 2016
380	Chenango County			958	402.343		Niu et al., 2016
380	Chenango County			2717	2161.34		Niu et al., 2016
380	Chenango County			773	217.343		Niu et al., 2016
380	Chenango County			801	245.343		Niu et al., 2016
380	Chenango County			775	219.343		Niu et al., 2016
380	Chenango County			1676	1120.34		Niu et al., 2016
380	Chenango County			2364	1808.34		Niu et al., 2016
380	Chenango County			3098	2542.34		Niu et al., 2016
380	Chenango County			2210	1654.34		Niu et al., 2016
380	Chenango County			1332	776.343		Niu et al., 2016
380	Chenango County			3489	2933.34		Niu et al., 2016
380	Chenango County			2286	1730.34		Niu et al., 2016
380	Chenango County			1112	556.343		Niu et al., 2016
380	Chenango County			1238	682.343		Niu et al., 2016
380	Chenango County			2704	2148.34		Niu et al., 2016
380	Chenango County			6281	5725.34		Niu et al., 2016
380	Chenango County			3011	2455.34		Niu et al., 2016
380	Chenango County			1615	1059.34		Niu et al., 2016
380	Chenango County			2196	1640.34		Niu et al., 2016
380	Chenango County			1800	1244.34		Niu et al., 2016
380	Chenango County			2174	1618.34		Niu et al., 2016
380	Chenango County			2048	1492.34		Niu et al., 2016
380	Chenango County			686	130.343		Niu et al., 2016
380	Chenango County			1457	901.343		Niu et al., 2016
380	Chenango County			1076	520.343		Niu et al., 2016
380	Chenango County			1589	1033.34		Niu et al., 2016
380	Chenango County			1756	1200.34		Niu et al., 2016
380	Chenango County			1019	463.343		Niu et al., 2016
380	Chenango County			781	225.343		Niu et al., 2016
380	Chenango County			750	194.343		Niu et al., 2016
380	Chenango County			725	169.343		Niu et al., 2016
380	Chenango County			797	241.343		Niu et al., 2016
380	Chenango County			3164	2608.34		Niu et al., 2016
380	Chenango County			1500	944.343		Niu et al., 2016
380	Chenango County			2392	1836.34		Niu et al., 2016
380	Chenango County			771	215.343		Niu et al., 2016
380	Chenango County			853	297.343		Niu et al., 2016
380	Chenango County			748	192.343		Niu et al., 2016
380	Chenango County			715	159.343		Niu et al., 2016
380	Chenango County			820	264.343		Niu et al., 2016
380	Chenango County			695	139.343		Niu et al., 2016
380	Chenango County			730	174.343		Niu et al., 2016
380	Chenango County			797	241.343		Niu et al., 2016
380	Chenango County			710	154.343		Niu et al., 2016
380	Chenango County			754	198.343		Niu et al., 2016
380	Chenango County			640	84.3429		Niu et al., 2016
380	Chenango County			824	268.343		Niu et al., 2016
380	Chenango County			850	294.343		Niu et al., 2016
380	Chenango County			722	166.343		Niu et al., 2016
380	Chenango County			746	190.343		Niu et al., 2016
380	Chenango County			1201	645.343		Niu et al., 2016
380	Chenango County			5919	5363.34		Niu et al., 2016
380	Chenango County			1650	1094.34		Niu et al., 2016
380	Chenango County			513	0		Niu et al., 2016
380	Chenango County			3038	2482.34		Niu et al., 2016
380	Chenango County			493	0		Niu et al., 2016
380	Chenango County			10820	10264.3		Niu et al., 2016
380	Chenango County			1000	444.343		Niu et al., 2016
380	Chenango County			1889	1333.34		Niu et al., 2016
380	Chenango County			1072	516.343		Niu et al., 2016
380	Chenango County			835	279.343		Niu et al., 2016
380	Chenango County			1142	586.343		Niu et al., 2016
380	Chenango County			676	120.343		Niu et al., 2016
380	Chenango County			615	59.3429		Niu et al., 2016
380	Chenango County			616	60.3429		Niu et al., 2016
380	Chenango County			726	170.343		Niu et al., 2016
380	Chenango County			815	259.343		Niu et al., 2016
380	Chenango County			974	418.343		Niu et al., 2016
380	Chenango County			740	184.343		Niu et al., 2016
380	Chenango County			823	267.343		Niu et al., 2016
380	Chenango County			734	178.343		Niu et al., 2016
380	Chenango County			830	274.343		Niu et al., 2016
380	Chenango County			970	414.343		Niu et al., 2016
380	Chenango County			1211	655.343		Niu et al., 2016
380	Chenango County			1249	693.343		Niu et al., 2016
380	Chenango County			3864	3308.34		Niu et al., 2016
380	Chenango County			8864	8308.34		Niu et al., 2016
380	Chenango County			3698	3142.34		Niu et al., 2016
380	Chenango County			553	0		Niu et al., 2016
380	Chenango County			431	0		Niu et al., 2016
380	Chenango County			119	0		Niu et al., 2016
380	Chenango County			449	0		Niu et al., 2016
380	Chenango County			452	0		Niu et al., 2016
380	Chenango County			513	0		Niu et al., 2016
380	Chenango County			541	0		Niu et al., 2016
380	Chenango County			569	13.3429		Niu et al., 2016
380	Chenango County			527	0		Niu et al., 2016
380	Chenango County			761	205.343		Niu et al., 2016
380	Chenango County			778	222.343		Niu et al., 2016
380	Chenango County			649	93.3429		Niu et al., 2016
380	Chenango County			578	22.3429		Niu et al., 2016
380	Chenango County			573	17.3429		Niu et al., 2016
380	Chenango County			621	65.3429		Niu et al., 2016
380	Chenango County			605	49.3429		Niu et al., 2016
380	Chenango County			646	90.3429		Niu et al., 2016
380	Chenango County			618	62.3429		Niu et al., 2016
380	Chenango County			531	0		Niu et al., 2016
380	Chenango County			509	0		Niu et al., 2016
380	Chenango County			132	0		Niu et al., 2016
380	Chenango County			585	29.3429		Niu et al., 2016
380	Chenango County			600	44.3429		Niu et al., 2016
380	Chenango County			599	43.3429		Niu et al., 2016
380	Chenango County			755	199.343		Niu et al., 2016
380	Chenango County			616	60.3429		Niu et al., 2016
380	Chenango County			595	39.3429		Niu et al., 2016
380	Chenango County			724	168.343		Niu et al., 2016
380	Chenango County			688	132.343		Niu et al., 2016
380	Chenango County			719	163.343		Niu et al., 2016
380	Chenango County			676	120.343		Niu et al., 2016
380	Chenango County			671	115.343		Niu et al., 2016
380	Chenango County			723	167.343		Niu et al., 2016
380	Chenango County			778	222.343		Niu et al., 2016
380	Chenango County			747	191.343		Niu et al., 2016
380	Chenango County			764	208.343		Niu et al., 2016
380	Chenango County			713	157.343		Niu et al., 2016
380	Chenango County			753	197.343		Niu et al., 2016
380	Chenango County			715	159.343		Niu et al., 2016
380	Chenango County			721	165.343		Niu et al., 2016
380	Chenango County			737	181.343		Niu et al., 2016
380	Chenango County			712	156.343		Niu et al., 2016
380	Chenango County			311	0		Niu et al., 2016
380	Chenango County			510	0		Niu et al., 2016
380	Chenango County			697	141.343		Niu et al., 2016
380	Chenango County			712	156.343		Niu et al., 2016
380	Chenango County			795	239.343		Niu et al., 2016
380	Chenango County			689	133.343		Niu et al., 2016
380	Chenango County			546	0		Niu et al., 2016
380	Chenango County			502	0		Niu et al., 2016
380	Chenango County			574	18.3429		Niu et al., 2016
380	Chenango County			561	5.34286		Niu et al., 2016
380	Chenango County			94	0		Niu et al., 2016
380	Chenango County			507	0		Niu et al., 2016
380	Chenango County			498	0		Niu et al., 2016
380	Chenango County			477	0		Niu et al., 2016
380	Chenango County			452	0		Niu et al., 2016
380	Chenango County			450	0		Niu et al., 2016
380	Chenango County			516	0		Niu et al., 2016
380	Chenango County			514	0		Niu et al., 2016
380	Chenango County			498	0		Niu et al., 2016
380	Chenango County			504	0		Niu et al., 2016
380	Chenango County			483	0		Niu et al., 2016
380	Chenango County			500	0		Niu et al., 2016
380	Chenango County			486	0		Niu et al., 2016
380	Chenango County			517	0		Niu et al., 2016
380	Chenango County			539	0		Niu et al., 2016
380	Chenango County			510	0		Niu et al., 2016
380	Chenango County			543	0		Niu et al., 2016
380	Chenango County			465	0		Niu et al., 2016
380	Chenango County			450	0		Niu et al., 2016
380	Chenango County			81	0		Niu et al., 2016
380	Chenango County			485	0		Niu et al., 2016
380	Chenango County			470	0		Niu et al., 2016
380	Chenango County			490	0		Niu et al., 2016
380	Chenango County			548	0		Niu et al., 2016
380	Chenango County			583	27.3429		Niu et al., 2016
380	Chenango County			574	18.3429		Niu et al., 2016
380	Chenango County			556	0.342857		Niu et al., 2016
380	Chenango County			564	8.34286		Niu et al., 2016
380	Chenango County			239	0		Niu et al., 2016
380	Chenango County			599	43.3429		Niu et al., 2016
380	Chenango County			745	189.343		Niu et al., 2016
380	Chenango County			753	197.343		Niu et al., 2016
380	Chenango County			796	240.343		Niu et al., 2016
380	Chenango County			655	99.3429		Niu et al., 2016
380	Chenango County			714	158.343		Niu et al., 2016
380	Chenango County			570	14.3429		Niu et al., 2016
380	Chenango County			492	0		Niu et al., 2016
380	Chenango County			514	0		Niu et al., 2016
380	Chenango County			484	0		Niu et al., 2016
380	Chenango County			479	0		Niu et al., 2016
380	Chenango County			483	0		Niu et al., 2016
380	Chenango County			496	0		Niu et al., 2016
380	Chenango County			553	0		Niu et al., 2016
380	Chenango County			503	0		Niu et al., 2016
380	Chenango County			489	0		Niu et al., 2016
380	Chenango County			493	0		Niu et al., 2016
380	Chenango County			664	108.343		Niu et al., 2016
380	Chenango County			508	0		Niu et al., 2016
380	Tioga County	0.22	7.92	1093	486.829		Phan et al., 2015
380	Tioga County	0.57	17.3	500	0		Phan et al., 2015
380	Tioga County	1.25	15.9	584	0		Phan et al., 2015
380	Tioga County	1.47	12.9	348	0		Phan et al., 2015
380	Tioga County	1.06	6.54	670	169.449		Phan et al., 2015
380	Tioga County	0.36	8.24	568	0		Phan et al., 2015
380	Tioga County		3.38	185	0		Phan et al., 2015
380	Greene County		13.7	514.2	0		Phan et al., 2015
380	Greene County		2.97	1938	1710.69		Phan et al., 2015
380	Greene County	1.07	15.8	467.3	0		Phan et al., 2015
380	Greene County	1.08	17.1	765.8	0		Phan et al., 2015
380	Greene County	1.11	17.7	898.4	0		Phan et al., 2015
380	Greene County	2.47	15	603.7	0		Phan et al., 2015
380	Greene County	1.55	2.57	251.7	55.0004		Phan et al., 2015
380	Greene County		0.45	3333	3298.56		Phan et al., 2015
360	Spiti region		11.1124	381.4	0		Ganai and Rashid, 2019
360	Spiti region		5.45824	245.8	0		Ganai and Rashid, 2019
360	Spiti region		9.84706	616	0		Ganai and Rashid, 2019
360	Spiti region		8.19529				Ganai and Rashid, 2019
360	Spiti region		6.98824				Ganai and Rashid, 2019
360	Spiti region		7.57588	390.6	0		Ganai and Rashid, 2019
360	Spiti region		9.07941	482.1	0		Ganai and Rashid, 2019
360	Spiti region		9.71471	505.5	0		Ganai and Rashid, 2019
360	Spiti region		8.68765				Ganai and Rashid, 2019
360	Spiti region		9.53471	606.4	0		Ganai and Rashid, 2019
360	Spiti region		10.6412				Ganai and Rashid, 2019
360	Spiti region		10.7471				Ganai and Rashid, 2019
360	Spiti region		9.07941				Ganai and Rashid, 2019
360	Spiti region		7.98882	690.1	78.661		Ganai and Rashid, 2019
360	Spiti region		7.86706	490	0		Ganai and Rashid, 2019
360	Spiti region		8.98412	708	20.3844		Ganai and Rashid, 2019
360	Spiti region		7.08882	577.7	35.1442		Ganai and Rashid, 2019
360	Spiti region		6.41647	527.7	36.6039		Ganai and Rashid, 2019
360	Spiti region		12.4624	400.7	0		Ganai and Rashid, 2019
360	Spiti region		8.68765				Ganai and Rashid, 2019
360	Spiti region		8.04176	466.3	0		Ganai and Rashid, 2019
360	Spiti region		5.90824	275.5	0		Ganai and Rashid, 2019
360	Spiti region		8.27471	553.9	0		Ganai and Rashid, 2019
360	Spiti region		8.46	704.6	57.0987		Ganai and Rashid, 2019
360	Spiti region		7.53353				Ganai and Rashid, 2019
360	Spiti region		3.42529	190.2	0		Ganai and Rashid, 2019
360	Spiti region		3.84353				Ganai and Rashid, 2019
360	Spiti region		3.82235	183.8	0		Ganai and Rashid, 2019
360	Spiti region		3.32471	249.4	0		Ganai and Rashid, 2019
360	Spiti region		4.08706	650	337.19		Ganai and Rashid, 2019
Niu, D., Renock, D., Whitehouse, M., Leone, J., Rowe, H., Landis, J., Hamren, K., Symcox, C. W. and Sharma, M., 2016. A relict sulfate–methane transition zone in the mid-Devonian Marcellus Shale. Geochim. Cosmochim. Acta 182, 73-87.
Phan, T. T., Capo, R. C., Stewart, B. W., Graney, J. R., Johnson, J. D., Sharma, S. and Toro, J., 2015. Trace metal distribution and mobility in drill cuttings and produced waters from Marcellus Shale gas extraction: Uranium, arsenic, barium. Applied Geochemistry 60, 89-103.
Ganai, J. A. and Rashid, S. A., 2019. Anoxia and fluctuating climate recorded from the Devonian–Carboniferous black shales, Tethys Himalaya, India: a multi-proxy approach. International Journal of Earth Sciences 108, 863-883.

## Sheet: Mesozoic
Time bin (Ma)	Period	Sample	TOC	Al	Ba	Babio	Reference
				%	ppm
145	J-C boundary	average	7.6	7.23529	492	0	Lipinski et al., 2003
145	J-C boundary	max	37.2		2238	1684.23	Lipinski et al., 2003
93.9	Late Createaous	average	6.5	2.43396	645	458.712	Lipinski et al., 2003
93.9	Late Createaous	max	14.7		3882	3695.71	Lipinski et al., 2003
5	Mediterranean sapropels	average	5.5	3.83019	1015	721.85	Lipinski et al., 2003
5	Mediterranean sapropels	max	28		3514	3220.85	Lipinski et al., 2003
3	Black sea sapropels	average	6.5	4.8	624	256.623	Lipinski et al., 2003
3	Black sea sapropels	max	14.7		1240	872.623	Lipinski et al., 2003
165	Middle-upper Jurassic	ANS-1	4.52	2.92		50	Mohammedyasin et al., 2019
165	Middle-upper Jurassic	ANS-2	3.97	2.25		60	Mohammedyasin et al., 2019
165	Middle-upper Jurassic	ANS-3	5.36	3.1		70	Mohammedyasin et al., 2019
165	Middle-upper Jurassic	ANS-4	5.28	3.2		110	Mohammedyasin et al., 2019
165	Middle-upper Jurassic	ANS-5	4.19	2.68		50	Mohammedyasin et al., 2019
165	Middle-upper Jurassic	ANS-6	3.58	1.59		70	Mohammedyasin et al., 2019
165	Middle-upper Jurassic	GS-1	0.53	8.56		120	Mohammedyasin et al., 2019
165	Middle-upper Jurassic	GS-2	0.65	8.56		120	Mohammedyasin et al., 2019
165	Middle-upper Jurassic	GS-3	0.57	8.51		120	Mohammedyasin et al., 2019
165	Middle-upper Jurassic	GMS-1	0.44	8.88		140	Mohammedyasin et al., 2019
165	Middle-upper Jurassic	GMS-2	0.75	9.8		110	Mohammedyasin et al., 2019
165	Middle-upper Jurassic	GMS-3	0.21	8.73		1490	Mohammedyasin et al., 2019
165	Middle-upper Jurassic	GMS-4	0.9	9.71		240	Mohammedyasin et al., 2019
165	Middle-upper Jurassic	GMS-5	3.12	9.01		140	Mohammedyasin et al., 2019
165	Middle-upper Jurassic	GMS-6	1.37	9.69		130	Mohammedyasin et al., 2019
121	Early Createaous	LSD-1		9.42353	1189.47	467.963	Zhang et al., 2020
121	Early Createaous	LSD-2		8.97353	1286.83	599.777	Zhang et al., 2020
121	Early Createaous	LSD-3		6.14118	716.93	246.734	Zhang et al., 2020
121	Early Createaous	LSD-4		7.75588	744.14	150.315	Zhang et al., 2020
121	Early Createaous	LSD-5		7.71353	1101.5	510.918	Zhang et al., 2020
121	Early Createaous	LSD-6		7.89353	722.52	118.157	Zhang et al., 2020
121	Early Createaous	LSD-7		2.76882	395.5	183.507	Zhang et al., 2020
121	Early Createaous	LSD-8		6.32647	812.27	327.887	Zhang et al., 2020
121	Early Createaous	LSD-9		7.08353	724.99	182.644	Zhang et al., 2020
121	Early Createaous	LSD-10		6.16235	741.99	270.173	Zhang et al., 2020
121	Early Createaous	LSD-11		6.71824	686.37	171.992	Zhang et al., 2020
121	Early Createaous	LSD-12		6.35294	718	231.591	Zhang et al., 2020
121	Early Createaous	LSD-13		7.06235	1487.58	946.855	Zhang et al., 2020
121	Early Createaous	LSD-14		7.54941	730.94	152.924	Zhang et al., 2020
121	Early Createaous	LSD-15		7.59176	767.02	185.761	Zhang et al., 2020
121	Early Createaous	LSD-16		8.31176	937.64	301.255	Zhang et al., 2020
121	Early Createaous	LSD-17		7.78765	756.8	160.543	Zhang et al., 2020
121	Early Createaous	LSD-18		7.03059	561.97	23.6771	Zhang et al., 2020
121	Early Createaous	LSD-19		6.60706	590.49	84.6244	Zhang et al., 2020
121	Early Createaous	LSD-20		7.68706	539.42	0	Zhang et al., 2020
121	Early Createaous	LSD-21		7.54412	927.17	349.559	Zhang et al., 2020
121	Early Createaous	LSD-22		6.30529	789.81	307.049	Zhang et al., 2020
121	Early Createaous	LSD-23		6.24706	826.13	347.828	Zhang et al., 2020
121	Early Createaous	LSD-24		9.04235	1173.89	481.568	Zhang et al., 2020
121	Early Createaous	LSD-25		8.10529	1252.64	632.063	Zhang et al., 2020
121	Early Createaous	LSD-26		8.27471	1225.45	591.902	Zhang et al., 2020
121	Early Createaous	LSD-27		7.38529	977.01	411.559	Zhang et al., 2020
121	Early Createaous	LSD-28		7.33765	991.57	429.767	Zhang et al., 2020
121	Early Createaous	LSD-29		8.70353	1286.83	620.449	Zhang et al., 2020
121	Early Createaous	LSD-30		9.02118	1256.48	565.779	Zhang et al., 2020
140	Early Createaous	PA15		6.80294	626.797	105.934	Richiano et al., 2019
140	Early Createaous	PA13		7.38529	626.797	61.3466	Richiano et al., 2019
140	Early Createaous	PA5		7.96765	537.255	0	Richiano et al., 2019
140	Early Createaous	PA3		7.54412	626.797	49.1864	Richiano et al., 2019
140	Early Createaous	PA2		8.41765	984.967	340.475	Richiano et al., 2019
140	Early Createaous	PA1		8.62941	984.967	324.261	Richiano et al., 2019
140	Early Createaous	PG59		6.88235	805.882	278.939	Richiano et al., 2019
140	Early Createaous	PG45		5.58529	626.797	199.163	Richiano et al., 2019
140	Early Createaous	PG40		10.35	1522.22	729.781	Richiano et al., 2019
140	Early Createaous	PG37		10.2441	1343.14	558.802	Richiano et al., 2019
140	Early Createaous	PG34		5.05059	537.255	150.56	Richiano et al., 2019
140	Early Createaous	IG44		6.03529	537.255	75.1661	Richiano et al., 2019
140	Early Createaous	IG39		10.1912	895.425	115.143	Richiano et al., 2019
140	Early Createaous	IG36		8.33824	805.882	167.47	Richiano et al., 2019
140	Early Createaous	IG32		8.12647	716.34	94.1414	Richiano et al., 2019
140	Early Createaous	IG26		8.28529	805.882	171.524	Richiano et al., 2019
140	Early Createaous	IG5		8.39118	1253.59	611.129	Richiano et al., 2019
208	Late Triassic	S-1		9.56118	918.6	186.554	Chen et al., 2021
208	Late Triassic	S-2		9.01588	738.7	48.4042	Chen et al., 2021
208	Late Triassic	S-3		8.76176	517.3	0	Chen et al., 2021
208	Late Triassic	S-4		8.00471	925.5	312.624	Chen et al., 2021
208	Late Triassic	S-5		10.0535	712	0	Chen et al., 2021
208	Late Triassic	S-6		8.17941	974	347.748	Chen et al., 2021
208	Late Triassic	S-7		7.70824	801.5	211.323	Chen et al., 2021
208	Late Triassic	S-8		8.79353	646	0	Chen et al., 2021
208	Late Triassic	S-9		9.31235	748.9	35.9051	Chen et al., 2021
208	Late Triassic	S-10		9.37059	693.3	0	Chen et al., 2021
220	Late Triassic	YK1-25		7.66588	321.6	0	He et al., 2019
220	Late Triassic	YK1-24		9.04765	765.1	72.3722	He et al., 2019
220	Late Triassic	YK1-23		9.75176	433.3	0	He et al., 2019
220	Late Triassic	YK1-22		7.56529	285	0	He et al., 2019
220	Late Triassic	YK1-20		7.98353	365.9	0	He et al., 2019
220	Late Triassic	YK1-19		6.55412	362.1	0	He et al., 2019
220	Late Triassic	YK1-18		6.70765	602.9	89.3329	He et al., 2019
220	Late Triassic	YK1-17		8.28	569.3	0	He et al., 2019
220	Late Triassic	YK1-16		9.25941	768.1	59.1585	He et al., 2019
220	Late Triassic	YK1-14		9.21176	533.1	0	He et al., 2019
220	Late Triassic	YK1-12		8.17941	576.9	0	He et al., 2019
220	Late Triassic	YK1-11		8.86765	405.8	0	He et al., 2019
220	Late Triassic	YK1-8		6.52235	567.1	67.7198	He et al., 2019
220	Late Triassic	YK1-7		9.51882	496.5	0	He et al., 2019
220	Late Triassic	YK1-6		6.63353	228.3	0	He et al., 2019
220	Late Triassic	YK1-5		9.54	726.2	0	He et al., 2019
220	Late Triassic	YK1-4		9.06882	614.7	0	He et al., 2019
220	Late Triassic	YK1-3		7.64471	643.2	57.8875	He et al., 2019
220	Late Triassic	YK1-2		7.42765	1065.1	496.407	He et al., 2019
Lipinski, M., Warning, B. and Brumsack, H.-J., 2003. Trace metal signatures of Jurassic/Cretaceous black shales from the Norwegian Shelf and the Barents Sea. Palaeogeography, Palaeoclimatology, Palaeoecology 190, 459-475.
Mohammedyasin, M. S., Wudie, G., Anteneh, Z. L. and Bawoke, G. T., 2019. Paleoredox conditions of the Middle-Upper Jurassic black shales in the Blue Nile Basin, Ethiopia. Journal of African Earth Sciences 151, 136-145.
Zhang, X., Li, S., Yan, M., Wang, X. and Geng, G., 2020. Early Cretaceous black shale in the Fajiaying Formation (Lingshan Island, East China): Terrestrial record of hothouse climate. Journal of Asian Earth Sciences 191, 104200.
Richiano, S., Gómez-Peral, L. E., Varela, A. N., Gómez Dacal, A. R., Cavarozzi, C. E. and Poiré, D. G., 2019. Geochemical characterization of black shales from the Río Mayer Formation (Early Cretaceous), Austral-Magallanes Basin, Argentina: Provenance response during Gondwana break-up. Journal of South American Earth Sciences 93, 67-83.
Chen, Y., Liu, S., Zhu, Z., Wang, Z., Sun, X. and Xu, T., 2021. Geochemical characteristics and sedimentary setting of chang 9 shale in the Upper Triassic Yanchang Formation of southeastern Ordos Basin (NW China). Journal of Petroleum Science and Engineering 196, 108081.
He, C., Ji, L., Su, A., Wu, Y., Zhang, M., Zhou, S., Li, J., Hao, L. and Ma, Y., 2019. Source-rock evaluation and depositional environment of black shales in the Triassic Yanchang Formation, southern Ordos Basin, north-central China. Journal of Petroleum Science and Engineering 173, 899-911.

## Sheet: PETM
Time bin (Ma)	Section	Al	Ba	Babio	Reference
		%	ppm	ppm
56	Site 690	0.243547	412.27	393.629	Bridgestock et al., 2019
56	Site 690	0.29508	426.474	403.89	Bridgestock et al., 2019
56	Site 690	0.157772	388.237	376.161	Bridgestock et al., 2019
56	Site 690	1.72338	1059.72	927.821	Bridgestock et al., 2019
56	Site 690	1.96603	1237.82	1087.35	Bridgestock et al., 2019
56	Site 690	1.80302	1129.89	991.893	Bridgestock et al., 2019
56	Site 690	2.13301	1403.34	1240.09	Bridgestock et al., 2019
56	Site 690	1.96395	1317.57	1167.25	Bridgestock et al., 2019
56	Site 690	1.74163	1142.11	1008.81	Bridgestock et al., 2019
56	Site 690	2.10572	1207.46	1046.29	Bridgestock et al., 2019
56	Site 690	2.5371	1167.65	973.473	Bridgestock et al., 2019
56	Site 690	2.92335	1092.94	869.196	Bridgestock et al., 2019
56	Site 690	2.78831	1044.79	831.383	Bridgestock et al., 2019
56	Site 690	2.59175	966.218	767.853	Bridgestock et al., 2019
56	Site 690	2.5079	1093.61	901.667	Bridgestock et al., 2019
56	Site 690	2.16773	1055.12	889.212	Bridgestock et al., 2019
56	Site 690	2.9962	1181.83	952.509	Bridgestock et al., 2019
56	Site 690	3.07119	1025.88	790.822	Bridgestock et al., 2019
56	Site 690	2.06348	468.622	310.69	Bridgestock et al., 2019
56	Site 690	1.62911	607.424	482.737	Bridgestock et al., 2019
56	Site 690	0.982595	493.121	417.916	Bridgestock et al., 2019
56	Site 1263	0.41364	784.244	752.585	Bridgestock et al., 2019
56	Site 1263	0.458351	903.934	868.854	Bridgestock et al., 2019
56	Site 1263	0.652102	1037.83	987.921	Bridgestock et al., 2019
56	Site 1263	0.568161	1041.4	997.918	Bridgestock et al., 2019
56	Site 1263	1.58122	2111.48	1990.46	Bridgestock et al., 2019
56	Site 1263	1.74853	2203.99	2070.16	Bridgestock et al., 2019
56	Site 1263	2.20467	2741.17	2572.43	Bridgestock et al., 2019
56	Site 1263	2.42076	2711.19	2525.91	Bridgestock et al., 2019
56	Site 1263	2.42552	1965.28	1779.64	Bridgestock et al., 2019
56	Site 1263	3.20721	1815.34	1569.87	Bridgestock et al., 2019
56	Site 1263	3.85233	2529.1	2234.25	Bridgestock et al., 2019
56	Site 1263	3.85233	2301.76	2006.91	Bridgestock et al., 2019
56	Site 1263	3.85233	2301.75	2006.91	Bridgestock et al., 2019
56	Site 1263	3.91496	1809.53	1509.89	Bridgestock et al., 2019
56	Site 1263	3.91496	1809.53	1509.89	Bridgestock et al., 2019
56	Site 1263	3.91496	1971.62	1671.98	Bridgestock et al., 2019
56	Site 1263	4.29816	1323.27	994.304	Bridgestock et al., 2019
56	Site 1263	3.92463	429.148	128.769	Bridgestock et al., 2019
56	Site 1263	3.85075	333.24	38.5162	Bridgestock et al., 2019
56	Site 1263	5.07039	1039.88	651.81	Bridgestock et al., 2019
56	Site 1263	2.71935	552.628	344.498	Bridgestock et al., 2019
56	Site 1263	1.15178	490.64	402.486	Bridgestock et al., 2019
56	Site 1263	0.770267	807.102	748.149	Bridgestock et al., 2019
56	Site 1263	0.770267	807.093	748.139	Bridgestock et al., 2019
56	Site 1263	0.770267	878.313	819.359	Bridgestock et al., 2019
56	Site 1263	0.770267	882.107	823.153	Bridgestock et al., 2019
56	Site 1263	0.770267	884.5	825.546	Bridgestock et al., 2019
56	Site 1263	0.770267	883.237	824.283	Bridgestock et al., 2019
56	Site 1263	0.681569	1374.49	1322.33	Bridgestock et al., 2019
56	Site 1263	0.593923	1266.93	1221.48	Bridgestock et al., 2019
56	Site 1263	0.516058	1570.56	1531.06	Bridgestock et al., 2019
56	Site 1263	0.489197	1084.76	1047.32	Bridgestock et al., 2019
Bridgestock, L., Hsieh, Y.-T., Porcelli, D. and Henderson, G. M., 2019. Increased export production during recovery from the Paleocene–Eocene thermal maximum constrained by sedimentary Ba isotopes. Earth Planet. Sci. Lett. 510, 53-63.

## Sheet: South Atlantic
Age (Ma)	Section	Ba	Al	Babio	References
		ppm	%	ppm
0	South Atlantic	491.405	1.1788	401.184	Bridgestock et al., 2018
0	South Atlantic	491.649	1.1097	406.717	Bridgestock et al., 2018
0	South Atlantic	533.373	1.1454	445.708	Bridgestock et al., 2018
0	South Atlantic	523.184	1.10008	438.987	Bridgestock et al., 2018
0	South Atlantic	496.767	1.03648	417.438	Bridgestock et al., 2018
0	South Atlantic	533.947	1.00437	457.076	Bridgestock et al., 2018
0	South Atlantic	561.834	1.0905	478.37	Bridgestock et al., 2018
0	South Atlantic	538.182	1.13588	451.245	Bridgestock et al., 2018
0	South Atlantic	588.006	1.33238	486.03	Bridgestock et al., 2018
0	South Atlantic	629.429	1.62845	504.793	Bridgestock et al., 2018
0	South Atlantic	599.449	1.66445	472.057	Bridgestock et al., 2018
0	South Atlantic	632.202	2.06962	473.799	Bridgestock et al., 2018
0	South Atlantic	596.639	2.13978	432.867	Bridgestock et al., 2018
0	South Atlantic	572.778	1.85393	430.884	Bridgestock et al., 2018
0	South Atlantic	571.274	2.22988	400.606	Bridgestock et al., 2018
0	South Atlantic	1000.71	7.4395	431.312	Bridgestock et al., 2018
0	South Atlantic	1079.03	7.58802	498.267	Bridgestock et al., 2018
0	South Atlantic	1000.89	7.55573	422.602	Bridgestock et al., 2018
0	South Atlantic	978.941	7.39814	412.711	Bridgestock et al., 2018
0	South Atlantic	1073.46	7.82415	474.62	Bridgestock et al., 2018
0	South Atlantic	1103.52	7.52649	527.462	Bridgestock et al., 2018
0	South Atlantic	1101.86	7.66005	515.589	Bridgestock et al., 2018
0	South Atlantic	1036.99	7.78541	441.119	Bridgestock et al., 2018
0	South Atlantic	1033.63	8.03347	418.779	Bridgestock et al., 2018
0	South Atlantic	1020.68	7.74018	428.276	Bridgestock et al., 2018
0	South Atlantic	894.331	8.04133	278.873	Bridgestock et al., 2018
0	South Atlantic	685.979	8.54888	31.6756	Bridgestock et al., 2018
0	South Atlantic	714.953	8.79906	41.5013	Bridgestock et al., 2018
0	South Atlantic	659.893	8.45876	12.4865	Bridgestock et al., 2018
0	South Atlantic	659.893	8.45876	12.4865	Bridgestock et al., 2018
0	South Atlantic	610.642	8.72221	0	Bridgestock et al., 2018
0	South Atlantic	559.797	8.65131	0	Bridgestock et al., 2018
0	South Atlantic	570.131	9.38975	0	Bridgestock et al., 2018
0	South Atlantic	570.131	9.38975	0	Bridgestock et al., 2018
0	South Atlantic	532.71	9.13722	0	Bridgestock et al., 2018
0	South Atlantic	567.054	9.65641	0	Bridgestock et al., 2018
0	South Atlantic	566.415	8.59581	0	Bridgestock et al., 2018
0	South Atlantic	562.767	8.79248	0	Bridgestock et al., 2018
0	South Atlantic	576.169	7.56921	0	Bridgestock et al., 2018
0	South Atlantic	641.621	8.76537	0	Bridgestock et al., 2018
0	South Atlantic	551.445	8.10262	0	Bridgestock et al., 2018
0	South Atlantic	594.146	8.11371	0	Bridgestock et al., 2018
0	South Atlantic	583.969	8.38581	0	Bridgestock et al., 2018
0	South Atlantic	602.671	8.46217	0	Bridgestock et al., 2018
0	South Atlantic	596.626	8.40449	0	Bridgestock et al., 2018
0	South Atlantic	565.663	8.08894	0	Bridgestock et al., 2018
0	South Atlantic	633.525	8.7237	0	Bridgestock et al., 2018
0	South Atlantic	529.898	8.84703	0	Bridgestock et al., 2018
0	South Atlantic	550.325	8.58317	0	Bridgestock et al., 2018
0	South Atlantic	533.714	6.04437	71.0975	Bridgestock et al., 2018
0	South Atlantic	528.097	6.76183	10.5679	Bridgestock et al., 2018
0	South Atlantic	495.19	6.38417	6.56688	Bridgestock et al., 2018
0	South Atlantic	555.935	7.02802	18.0336	Bridgestock et al., 2018
0	South Atlantic	620.259	7.90104	15.5386	Bridgestock et al., 2018
0	South Atlantic	554.01	6.7051	40.8224	Bridgestock et al., 2018
0	South Atlantic	544.068	6.69866	31.3741	Bridgestock et al., 2018
0	South Atlantic	612.703	7.31995	52.458	Bridgestock et al., 2018
0	South Atlantic	591.156	7.21205	39.1682	Bridgestock et al., 2018
0	South Atlantic	462.821	6.19856	0	Bridgestock et al., 2018
0	South Atlantic	587.823	6.77181	69.5301	Bridgestock et al., 2018
0	South Atlantic	595.453	6.9853	60.8207	Bridgestock et al., 2018
0	South Atlantic	549.853	6.36057	63.035	Bridgestock et al., 2018
0	South Atlantic	575.147	6.74642	58.7977	Bridgestock et al., 2018
0	South Atlantic	611.281	7.23075	57.8624	Bridgestock et al., 2018
0	South Atlantic	579.725	6.69608	67.2279	Bridgestock et al., 2018
0	South Atlantic	582.495	6.57519	79.2513	Bridgestock et al., 2018
0	South Atlantic	454.889	7.44745	0	Bridgestock et al., 2018
0	South Atlantic	454.889	7.44745	0	Bridgestock et al., 2018
0	South Atlantic	436.936	6.94128	0	Bridgestock et al., 2018
0	South Atlantic	435.426	7.28222	0	Bridgestock et al., 2018
0	South Atlantic	452.736	7.33372	0	Bridgestock et al., 2018
0	South Atlantic	452.736	7.33372	0	Bridgestock et al., 2018
0	South Atlantic	465.646	7.41694	0	Bridgestock et al., 2018
0	South Atlantic	458.318	7.52858	0	Bridgestock et al., 2018
0	South Atlantic	484.295	7.57913	0	Bridgestock et al., 2018
0	South Atlantic	462.499	7.41492	0	Bridgestock et al., 2018
0	South Atlantic	475.435	7.49958	0	Bridgestock et al., 2018
0	South Atlantic	371.376	7.33846	0	Bridgestock et al., 2018
0	South Atlantic	484.602	7.37551	0	Bridgestock et al., 2018
0	South Atlantic	467.886	7.41061	0	Bridgestock et al., 2018
0	South Atlantic	456.421	7.35935	0	Bridgestock et al., 2018
0	South Atlantic	460.784	7.472	0	Bridgestock et al., 2018
0	South Atlantic	422.653	6.99483	0	Bridgestock et al., 2018
0	South Atlantic	464.81	7.31645	0	Bridgestock et al., 2018
0	South Atlantic	431.176	7.16714	0	Bridgestock et al., 2018
0	South Atlantic	437.572	7.20016	0	Bridgestock et al., 2018
0	South Atlantic	475.335	7.42641	0	Bridgestock et al., 2018
0	South Atlantic	470.444	7.01646	0	Bridgestock et al., 2018
0	South Atlantic	470.444	7.01646	0	Bridgestock et al., 2018
0	South Atlantic	471.078	6.62347	0	Bridgestock et al., 2018
0	South Atlantic	528.336	6.88475	1.39943	Bridgestock et al., 2018
0	South Atlantic	516.126	7.10411	0	Bridgestock et al., 2018
0	South Atlantic	512.664	6.66189	2.78459	Bridgestock et al., 2018
0	South Atlantic	445.067	6.33352	0	Bridgestock et al., 2018
0	South Atlantic	409.926	5.66183	0	Bridgestock et al., 2018
0	South Atlantic	397.017	6.17794	0	Bridgestock et al., 2018
0	South Atlantic	431.69	5.78642	0	Bridgestock et al., 2018
0	South Atlantic	468.544	6.25338	0	Bridgestock et al., 2018
0	South Atlantic	442.328	6.18821	0	Bridgestock et al., 2018
0	South Atlantic	385.158	5.56148	0	Bridgestock et al., 2018
0	South Atlantic	416.483	5.99718	0	Bridgestock et al., 2018
Bridgestock, L., Hsieh, Y.-T., Porcelli, D., Homoky, W. B., Bryan, A. and Henderson, G. M., 2018. Controls on the barium isotope compositions of marine sediments. Earth Planet. Sci. Lett. 481, 101-110.

## Sheet: Schoepfer 2015 ESR data
Site	redox category	Age	Al	TOC	Ba	Baexcess
		Ma	%	%	ppm	ppm
S Ocean	oxic	0	7.84	0.404157		388
S Ocean	oxic	0	7.59	0.407834		459
S Ocean	oxic	0	7.69	0.39272		427
S Ocean	oxic	0	7.72	0.4375		355
S Ocean	oxic	0	7.74	0.416495		440
S Ocean	oxic	0	7.82	0.516484		339
S Ocean	oxic	0	7.57	0.420432		385
S Ocean	oxic	0	7.91	0.401923		334
S Ocean	oxic	0	8.13	0.38664		213
S Ocean	oxic	0	8.02	0.402		206
S Ocean	oxic	0	7.85	0.373626		105
S Ocean	oxic	0	8.18	0.373239		155
S Ocean	oxic	0	8	0.322314		145
S Ocean	oxic	0	8.08	0.315436
S Ocean	oxic	0	8.16	0.297297
S Ocean	oxic	0	8.24	0.343949		180
S Ocean	oxic	0	8.36	0.313725
S Ocean	oxic	0	8.48	0.333333
S Ocean	oxic	0	8.6	0.348684		173
S Ocean	oxic	0	8.54333	0.321212
S Ocean	oxic	0	8.48667	0.320513
S Ocean	oxic	0	8.43	0.313725		183
S Ocean	oxic	0	8.41667	0.32716
S Ocean	oxic	0	8.40333	0.31875
S Ocean	oxic	0	8.39	0.323353		170
S Ocean	oxic	0	8.37667	0.325153
S Ocean	oxic	0	8.36333	0.36646
S Ocean	oxic	0	8.35	0.30303		156
S Ocean	oxic	0	8.20333	0.304094
S Ocean	oxic	0	8.05667	0.307692
S Ocean	oxic	0	7.91	0.266272		199
S Ocean	oxic	0	7.985	0.266272
S Ocean	oxic	0	8.06	0.259259
S Ocean	oxic	0	8.135	0.34104
S Ocean	oxic	0	8.21	0.3125		154
S Ocean	oxic	0	7.84	0.303226		285
S Ocean	oxic	0	7.75	0.274725		267
S Ocean	oxic	0	8.02	0.262994		223
S Ocean	oxic	0	7.45	0.208333		236
S Ocean	oxic	0	7.01	0.219316		221
S Ocean	oxic	0	7.05	0.173333		208
S Ocean	oxic	0	7	0.188716		147
S Ocean	oxic	0	6.93	0.172483		204
S Ocean	oxic	0	6.92	0.169145		177
S Ocean	oxic	0	7.36	0.194076		500
S Ocean	oxic	0	7.47	0.183486		561
S Ocean	oxic	0	7.58	0.199798		548
S Ocean	oxic	0	7.76	0.22449		660
S Ocean	oxic	0	7.57	0.237257		557
S Ocean	oxic	0	7.2	0.208249		494
S Ocean	oxic	0	7.14	0.213389		420
S Ocean	oxic	0	7.43	0.239645		288
S Ocean	oxic	0	7.66	0.229979		334
S Ocean	oxic	0	7.99	0.297945		170
S Ocean	oxic	0	7.93	0.280374		220
S Ocean	oxic	0	8.21	0.328032		172
S Ocean	oxic	0	8.28	0.363431		177
S Ocean	oxic	0	8.21	0.349024		172
S Ocean	oxic	0	8.18	0.34763		133
S Ocean	oxic	0	8.35	0.399381		139
S Ocean	oxic	0	8.34333	0.368159
S Ocean	oxic	0	8.33667	0.357843
S Ocean	oxic	0	8.33	0.321782		156
S Ocean	oxic	0	8.35667	0.341232
S Ocean	oxic	0	8.38333	0.362745
S Ocean	oxic	0	8.41	0.429245		89
S Ocean	oxic	0	8.29333	0.342342
S Ocean	oxic	0	8.17667	0.376744
S Ocean	oxic	0	8.06	0.407767		181
S Ocean	oxic	0	8.23667	0.344186
S Ocean	oxic	0	8.41333	0.31441
S Ocean	oxic	0	8.59	0.319048		263
S Ocean	oxic	0	8.40333	0.305936
S Ocean	oxic	0	8.21667	0.325792
S Ocean	oxic	0	8.03	0.330317		259
S Ocean	oxic	0	7.96	0.256966		350
S Ocean	oxic	0	7.55	0.193548		385
S Ocean	oxic	0	7.18	0.173295		345
S Ocean	oxic	0	7.44	0.161111		407
S Ocean	oxic	0	7.58	0.18845		392
S Ocean	oxic	0	7.76	0.196481		312
S Ocean	oxic	0	7	0.161644		318
S Ocean	oxic	0	7.37	0.246377		427
S Ocean	oxic	0	7.29	0.243243		402
S Ocean	oxic	0	7.68	0.262136		336
S Ocean	oxic	0	7.94	0.282392		186
S Ocean	oxic	0	8.03	0.290541		176
S Ocean	oxic	0	8.08	0.278986		232
S Ocean	oxic	0	8.07	0.323077		276
S Ocean	oxic	0	7.87	0.269113		303
S Ocean	oxic	0	8.14	0.352941		309
S Ocean	oxic	0	8.27	0.265993		377
S Ocean	oxic	0	7.98	0.280645		467
S Ocean	oxic	0	7.56	0.18799		408
S Ocean	oxic	0	7.37	0.188571		289
S Ocean	oxic	0	7.41	0.169591		290
S Ocean	oxic	0	7.11	0.159375		288
S Ocean	oxic	0	7.45	0.162791		439
S Ocean	oxic	0	7.81	0.230032		658
S Ocean	oxic	0	7.85	0.260355		573
S Ocean	oxic	0	7.29	0.223164		468
S Ocean	oxic	0	7.44	0.220588		584
S Ocean	oxic	0	7.39	0.272152		545
S Ocean	oxic	0	7.8	0.298742		469
S Ocean	oxic	0	8.09	0.327586		245
S Ocean	oxic	0	8.19	0.277778		233
S Ocean	oxic	0	8	0.315068		182
S Ocean	oxic	0	8.4	0.293333		194
S Ocean	oxic	0	7.81	0.253012		290
S Ocean	oxic	0	7.92	0.25		279
S Ocean	oxic	0	7.63	0.190476		260
S Ocean	oxic	0	7.45	0.191011		258
S Ocean	oxic	0	7.03	0.136364		355
S Ocean	oxic	0	7.58	0.174603		773
S Ocean	oxic	0	7.85	0.228261		647
S Ocean	oxic	0	7.74	0.247253		554
S Ocean	oxic	0	7.99	0.260116		383
S Ocean	oxic	0	7.69	0.275449		366
S Ocean	oxic	0	7.75	0.319277		282
S Ocean	oxic	0	7.31	0.276498		234
S Ocean	oxic	0	8.45	0.368132		164
S Ocean	oxic	0	8.25	0.361963		75
S Ocean	oxic	0	8.5	0.389831		0
S Ocean	oxic	0	6.83946	0.260143		1380
S Ocean	oxic	0	7.20326	0.19403		1030
S Ocean	oxic	0	7.20326	0.196617		767
S Ocean	oxic	0	6.98498	0.201814		644
S Ocean	oxic	0	7.20326	0.251732		574
S Ocean	oxic	0	7.70045	0.225664		490
S Ocean	oxic	0	8.42805	0.23399		382
S Ocean	oxic	0	8.06425	0.238095		389
S Ocean	oxic	0	7.70045	0.243902		339
S Ocean	oxic	0	8.06425	0.224138		298
S Ocean	oxic	0	9.22842	0.207447		282
S Ocean	oxic	0	10.1015	0.145631		296
S Ocean	oxic	0	7.48217	0.156627		437
S Ocean	oxic	0	8.35529	0.188679		329
S Ocean	oxic	0	8.7191	0.114833		290
S Ocean	oxic	0	8.86462	0.0990566		309
S Ocean	oxic	0	8.64633	0.122222		338
S Ocean	oxic	0	7.77321	0.0994764		417
S Ocean	oxic	0	7.70045	0.12963		423
S Ocean	oxic	0	7.40941	0.13089		470
S Ocean	oxic	0	7.40941	0.12234		460
S Ocean	oxic	0	7.27602	0.128342		513
S Ocean	oxic	0	7.20326	0.112299		513
S Ocean	oxic	0	7.84597	0.11413		397
S Ocean	oxic	0	7.20326	0.111111		497
S Ocean	oxic	0	7.05774	0.117021		534
S Ocean	oxic	0	7.27602	0.113514		495
S Ocean	oxic	0	7.1305	0.101604		484
S Ocean	oxic	0	7.1305	0.102041		534
S Ocean	oxic	0	6.62118	0.0788321		902
S Ocean	oxic	0	6.11186	0.0873016		916
S Ocean	oxic	0	5.74805	0.0852878		1050
S Ocean	oxic	0	6.11186	0.086785		589
S Ocean	oxic	0	6.62118	0.0972477		562
S Ocean	oxic	0	7.1305	0.110224		477
S Ocean	oxic	0	7.33665	0.0995025		491
S Ocean	oxic	0	7.40941	0.0933126		454
S Ocean	oxic	0	7.33665	0.100601		423
S Ocean	oxic	0	8.35529	0.125828		351
S Ocean	oxic	0	7.91873	0.1125		403
S Ocean	oxic	0	9.15566	0.078341		345
S Ocean	oxic	0	9.30118	0.101911		288
S Ocean	oxic	0	8.7191	0.122995		307
S Ocean	oxic	0	8.13701	0.172185		284
S Ocean	oxic	0	9.59222	0.147541		365
S Ocean	oxic	0	9.66498	0.0763052		333
S Ocean	oxic	0	10.3926	0.0658436		314
S Ocean	oxic	0	7.70045	0.0283688		427
S Ocean	oxic	0	11.0474	0.110887		296
S Ocean	oxic	0	7.62769	0.129897		480
S Ocean	oxic	0	7.48217	0.111332		457
S Ocean	oxic	0	7.33665	0.104701		284
S Ocean	oxic	0	7.33665	0.0902256		430
S Ocean	oxic	0	7.33665	0.0961538		424
S Ocean	oxic	0	7.27602	0.0905433		454
S Ocean	oxic	0	7.27602	0.0798548		377
S Ocean	oxic	0	7.1305	0.0951417		477
S Ocean	oxic	0	7.40941	0.097561		481
S Ocean	oxic	0	7.48217	0.10099		484
S Ocean	oxic	0	7.27602	0.0970297		527
S Ocean	oxic	0	7.20326	0.0854369		501
S Ocean	oxic	0	6.7667	0.0708955		924
S Ocean	oxic	0	7.20326	0.0989474		757
S Ocean	oxic	0	7.1305	0.11435		684
S Ocean	oxic	0	7.48217	0.104444		616
S Ocean	oxic	0	7.33665	0.0901288		711
S Ocean	oxic	0	6.47566	0.100457		1054
S Ocean	oxic	0	6.33014	0.0901408		626
S Ocean	oxic	0	7.1305	0.0892857		647
S Ocean	oxic	0	7.20326	0.0884354		624
S Ocean	oxic	0	7.40941	0.0815451		572
S Ocean	oxic	0	6.91222	0.0662393		689
S Ocean	oxic	0	6.18462	0.0739726		567
S Ocean	oxic	0	6.98498	0.0823245		572
S Ocean	oxic	0	7.55493	0.108225		497
S Ocean	oxic	0	8.86462	0.0875233		412
S Ocean	oxic	0	8.93738	0.110647		370
S Ocean	oxic	0	9.8105	0.193548		218
S Ocean	oxic	0	9.51946	0.181818		330
S Ocean	oxic	0	8.06425	0.110204		582
S Ocean	oxic	0	6.83946	0.0909091		1330
S Ocean	oxic	0	7.05774	0.114407		1283
S Ocean	oxic	0	7.91873	0.110169		594
S Ocean	oxic	0	7.91873	0.100806		464
S Ocean	oxic	0	7.70045	0.126984		393
S Ocean	oxic	0	11.3385	0.0801394		338
S Ocean	oxic	0	8.79186	0.126923		211
S Ocean	oxic	0	10.1743	0.099359		360
NW Indian	oxic	0.5	3.84353		2390	2140.17
NW Indian	oxic	1.5	4.62176		3470	3169.59
NW Indian	oxic	2.5	5.66471		4150	3781.79
NW Indian	oxic	3.5	7.46471		3900	3414.79
NW Indian	oxic	4.5	7.62353		3390	2894.47
NW Indian	oxic	5.5	6.98824		3430	2975.76
NW Indian	oxic	6.5	6.19412		2810	2407.38
NW Indian	oxic	7.5	5.77059		2020	1644.91
NW Indian	oxic	8.5	8.15294		3060	2530.06
NW Indian	oxic	9.5	8.47059		3120	2569.41
NW Indian	oxic	10.5	8.52353		2400	1845.97
NW Indian	oxic	11.5	8.52353		2120	1565.97
NW Indian	oxic	12.5	8.47059		1890	1339.41
NW Indian	oxic	13.5	8.68235		910	345.647
NW Indian	oxic	14.5	6.35294		780	367.059
NW Indian	oxic	15.5	8.62941		910	349.088
NW Indian	oxic	16.5	8.1		980	453.5
NW Indian	oxic	17.5	8.36471		1510	966.294
NW Indian	oxic	18.5	8.15294		1530	1000.06
NW Indian	oxic	19.5	8.04706		1580	1056.94
NW Indian	oxic	20.5	7.57059		1890	1397.91
NW Indian	oxic	21.5	1.57235		1010	907.797
Madingley Rise	oxic	0.0037	0.53		1147	1112.55
Madingley Rise	oxic	0.0089	0.47		969	938.45
Madingley Rise	oxic	0.0142	0.75		1185	1136.25
Madingley Rise	oxic	0.019	0.69		1069	1024.15
Madingley Rise	oxic	0.0228	0.61		980	940.35
Madingley Rise	oxic	0.0259	0.55		963	927.25
Madingley Rise	oxic	0.0297	0.56		955	918.6
Madingley Rise	oxic	0.0413	0.56		906	869.6
Madingley Rise	oxic	0.0472	0.61		938	898.35
Madingley Rise	oxic	0.0542	0.83		1121	1067.05
Madingley Rise	oxic	0.0586	0.82		1152	1098.7
Madingley Rise	oxic	0.0626	1.02		1624	1557.7
Madingley Rise	oxic	0.0688	0.98		1560	1496.3
Madingley Rise	oxic	0.0748	0.76		1373	1323.6
Madingley Rise	oxic	0.0826	0.79		1342	1290.65
Madingley Rise	oxic	0.0892	0.76		1454	1404.6
Madingley Rise	oxic	0.0957	0.91		1796	1736.85
Madingley Rise	oxic	0.1051	1.09		2198	2127.15
Madingley Rise	oxic	0.122	1.1		2238	2166.5
Madingley Rise	oxic	0.1365	0.99		1218	1153.65
Madingley Rise	oxic	0.151	0.91		1502	1442.85
Madingley Rise	oxic	0.1541	0.94		1401	1339.9
Madingley Rise	oxic	0.1572	0.9		1174	1115.5
Madingley Rise	oxic	0.1602	0.95		1263	1201.25
Madingley Rise	oxic	0.1633	0.95		1380	1318.25
Madingley Rise	oxic	0.1664	0.9		1357	1298.5
Madingley Rise	oxic	0.1695	0.79		1199	1147.65
Madingley Rise	oxic	0.1739	0.78		1224	1173.3
Madingley Rise	oxic	0.1796	0.93		1638	1577.55
Madingley Rise	oxic	0.1848	1.07		2210	2140.45
Madingley Rise	oxic	0.1894	0.92		1767	1707.2
Madingley Rise	oxic	0.194	0.67		1477	1433.45
Madingley Rise	oxic	0.216	0.68		1162	1117.8
Madingley Rise	oxic	0.2211	0.8		1188	1136
Madingley Rise	oxic	0.2267	0.88		1567	1509.8
Madingley Rise	oxic	0.2318	0.75		1380	1331.25
Madingley Rise	oxic	0.238	0.67		845	801.45
Madingley Rise	oxic	0.2427	0.58		978	940.3
Madingley Rise	oxic	0.249	0.52		1155	1121.2
Madingley Rise	oxic	0.257	0.51		1006	972.85
Madingley Rise	oxic	0.2614	0.72		1166	1119.2
Madingley Rise	oxic	0.265	0.99		1505	1440.65
Madingley Rise	oxic	0.269	1.23		2030	1950.05
Madingley Rise	oxic	0.287	0.67		1266	1222.45
Madingley Rise	oxic	0.2972	0.61		1169	1129.35
Madingley Rise	oxic	0.3056	0.61		1224	1184.35
Madingley Rise	oxic	0.3141	0.8		1613	1561
Madingley Rise	oxic	0.3225	0.76		1722	1672.6
Madingley Rise	oxic	0.331	0.66		1104	1061.1
Madingley Rise	oxic	0.3328	0.72		972	925.2
Socotra	oxic	0.031	1.17	0.97	653	576.95
Madingley Rise	oxic	0.335	0.73		1383	1335.55
Madingley Rise	oxic	0.3368	0.69		1374	1329.15
Madingley Rise	oxic	0.339	0.83		1333	1279.05
Socotra	oxic	0.036	1.16	1.01	577	501.6
Madingley Rise	oxic	0.341	0.84		1438	1383.4
Madingley Rise	oxic	0.3518	0.87		1630	1573.45
Madingley Rise	oxic	0.3615	1.07		2137	2067.45
Madingley Rise	oxic	0.3705	0.38		3217	3192.3
Socotra	oxic	0.038	1.12	1.1	608	535.2
Socotra	oxic	0.044	1.16	0.39	380	304.6
Madingley Rise	oxic	0.375	0.75		1210	1161.25
Madingley Rise	oxic	0.3808	0.68		1511	1466.8
Socotra	oxic	0.048	1.1	0.35	450	378.5
Socotra	oxic	0.052	1.72	0.89	310	198.2
Socotra	oxic	0.056	1.5	0.79	419	321.5
Socotra	oxic	0.059	1.4	0.8	370	279
Socotra	oxic	0.064	1.25	0.5	442	360.75
Socotra	oxic	0.069	0.84	0.78	470	415.4
Socotra	oxic	0.072	1.08	1.05	651	580.8
Socotra	oxic	0.073	1.37	0.84	505	415.95
Socotra	oxic	0.075	1.34	0.77	520	432.9
Socotra	oxic	0.077	0.84	0.75	500	445.4
Socotra	oxic	0.078	1.08	0.85	565	494.8
Socotra	oxic	0.08	1.225	0.75	570	570
Socotra	oxic	0.082	1.37	0.98	368	278.95
Socotra	oxic	0.083	1.08	0.64	365	365
Socotra	oxic	0.085	0.79	0.91	577	525.65
Socotra	oxic	0.087	0.73	0.73	585	537.55
Socotra	oxic	0.089	0.87	0.47	594	537.45
Socotra	oxic	0.09	0.85	0.63	540	484.75
Socotra	oxic	0.092	0.99	0.19	533	468.65
Socotra	oxic	0.094	0.96	0.5	560	497.6
Socotra	oxic	0.095	1.39	0.73	548	457.65
Socotra	oxic	0.097	1.15	0.91	565	490.25
Socotra	oxic	0.102	1.43	0.83	485	392.05
Socotra	oxic	0.106	0.97	0.9	670	606.95
Socotra	oxic	0.111	1.31	0.92	782	696.85
Socotra	oxic	0.115	1.33	0.96	840	753.55
Socotra	oxic	0.12	1.15	0.85	516	441.25
Socotra	oxic	0.122	1.35	0.61	770	682.25
Socotra	oxic	0.124	1.29	0.56	850	766.15
Socotra	oxic	0.126	1.36	0.51	400	311.6
Socotra	oxic	0.129	1.46	0.72	330	235.1
Socotra	oxic	0.133	1.17	1.09	585	508.95
Socotra	oxic	0.137	1.4	0.89	480	389
Socotra	oxic	0.14	1.4	0.98	580	489
Socotra	oxic	0.144	1.59	0.85	543	439.65
Socotra	oxic	0.147	1.43	0.56	340	247.05
Socotra	oxic	0.151	1.89	0.81	320	197.15
Socotra	oxic	0.155	1.84	0.82	400	280.4
Socotra	oxic	0.158	1.75	0.89	493	379.25
Socotra	oxic	0.162	1.77	1.02	415	299.95
Socotra	oxic	0.165	2.13	1.21	447	308.55
Socotra	oxic	0.169	1.29	1.79	510	426.15
Socotra	oxic	0.172	1.87	0.78	472	350.45
Socotra	oxic	0.176	1.67	0.55	420	311.45
Socotra	oxic	0.18	1.46	0.97	550	455.1
Socotra	oxic	0.183	1.55	0.88	725	624.25
Socotra	oxic	0.187	1.58	0.94	728	625.3
Socotra	oxic	0.189	1.79	0.47	480	363.65
Socotra	oxic	0.194	1.07	0.71	711	641.45
Socotra	oxic	0.199	0.99	0.71	440	375.65
Socotra	oxic	0.204	0.89	1.14	583	525.15
Socotra	oxic	0.208	1.01	1.01	600	534.35
Socotra	oxic	0.213	0.99	0.78	595	530.65
Socotra	oxic	0.216	0.85	0.42	450	394.75
Socotra	oxic	0.22	0.74		272	223.9
Socotra	oxic	0.223	0.7		420	374.5
Socotra	oxic	0.226	0.94	0.51	479	417.9
Socotra	oxic	0.229	0.9	0.63	460	401.5
Socotra	oxic	0.233	1.17	0.68	453	376.95
Socotra	oxic	0.236	0.66	0.76	540	497.1
Socotra	oxic	0.239	0.98	0.42	665	601.3
Socotra	oxic	0.242	0.78	0.49	150	99.3
Socotra	oxic	0.248	1.13	0.48	292	218.55
S Ocean	oxic	0.0041	0.47			1000
S Ocean	oxic	0.0083	0.67			1327
S Ocean	oxic	0.0108	0.98			1324
S Ocean	oxic	0.0135	1.47			1169
S Ocean	oxic	0.0161	1.25			876
S Ocean	oxic	0.0186	1.07			913
S Ocean	oxic	0.0217	1.43			893
S Ocean	oxic	0.0245	1.13			888
S Ocean	oxic	0.0311	0.65			1243
S Ocean	oxic	0.0416	0.54			1168
S Ocean	oxic	0.0517	0.58			1087
S Ocean	oxic	0.0636	0.67			1043
S Ocean	oxic	0.0716	0.65			991
S Ocean	oxic	0.0745	0.67			1125
S Ocean	oxic	0.0778	0.6			1103
S Ocean	oxic	0.0823	0.61			1287
S Ocean	oxic	0.0887	0.68			1432
S Ocean	oxic	0.0946	0.6			954
S Ocean	oxic	0.0985	0.63			1118
S Ocean	oxic	0.1006	0.6			917
S Ocean	oxic	0.1025	0.79			888
S Ocean	oxic	0.1051	0.64			1227
S Ocean	oxic	0.1097	0.52			1249
S Ocean	oxic	0.1171	0.49			999
S Ocean	oxic	0.1245	0.43			1161
S Ocean	oxic	0.1296	0.6			1047
S Ocean	oxic	0.1338	0.93			1267
S Ocean	oxic	0.1374	1.56			1217
S Ocean	oxic	0.1417	1.49			986
S Ocean	oxic	0.0005	0.33			800
S Ocean	oxic	0.0026	0.39			983
S Ocean	oxic	0.0056	0.49			965
S Ocean	oxic	0.0085	0.75			1377
S Ocean	oxic	0.0111	0.81			1052
S Ocean	oxic	0.0133	1.69			996
S Ocean	oxic	0.0124				249.004
S Ocean	oxic	0.0127	1.92			200.397
S Ocean	oxic	0.0129	2.2			185.362
S Ocean	oxic	0.0131	2.4			179.463
S Ocean	oxic	0.0133				174.819
S Ocean	oxic	0.0135	1.9			169.982
S Ocean	oxic	0.0137				164.468
S Ocean	oxic	0.0139	2.4			157.033
S Ocean	oxic	0.0141				178.571
S Ocean	oxic	0.0143	2.4			197.685
S Ocean	oxic	0.0146				226.814
S Ocean	oxic	0.0148	2.4			246.377
S Ocean	oxic	0.015	2.4			226.57
S Ocean	oxic	0.0153				203.875
S Ocean	oxic	0.0155	2.4			210.953
S Ocean	oxic	0.0158				210.662
S Ocean	oxic	0.016	2.3			210.89
S Ocean	oxic	0.0162	2.2			212.628
S Ocean	oxic	0.0164				224.054
S Ocean	oxic	0.0167				227.612
S Ocean	oxic	0.0168				198.905
S Ocean	oxic	0.017	1.95			182.119
S Ocean	oxic	0.0172	1.95			167.001
S Ocean	oxic	0.0173				167.557
S Ocean	oxic	0.0174				168.641
S Ocean	oxic	0.0176	1.75			165.528
S Ocean	oxic	0.0177				157.655
S Ocean	oxic	0.0179				159.514
S Ocean	oxic	0.018	1.45			158.136
S Ocean	oxic	0.0181				245.024
S Ocean	oxic	0.0182				206.48
S Ocean	oxic	0.0184	1.95			192.058
S Ocean	oxic	0.0185				192.364
S Ocean	oxic	0.0187	1.95			192.28
S Ocean	oxic	0.0189	1.95			200.389
S Ocean	oxic	0.0191				223.923
S Ocean	oxic	0.0194				257.238
S Ocean	oxic	0.0197	2.45			231.491
S Ocean	oxic	0.0199	2.45			208.972
S Ocean	oxic	0.0202				205.411
S Ocean	oxic	0.0204	2.45			200.166
S Ocean	oxic	0.0207	3.1			202.469
S Ocean	oxic	0.021				194.878
S Ocean	oxic	0.0213				123.541
S Ocean	oxic	0.0216	4			56.7879
S Ocean	oxic	0.0219				110.759
S Ocean	oxic	0.0221				168.623
S Ocean	oxic	0.0223	2.7			163.371
S Ocean	oxic	0.0226				158.052
S Ocean	oxic	0.0228				158.947
S Ocean	oxic	0.0231	2.45			160.131
S Ocean	oxic	0.0234				148.338
S Ocean	oxic	0.0238	3.44			137.427
S Ocean	oxic	0.0251	3.45			1152
S Ocean	oxic	0.0269	3.45			1324.32
S Ocean	oxic	0.0286				1509.93
S Ocean	oxic	0.0304	2.94			1603.55
S Ocean	oxic	0.0321				1605.88
S Ocean	oxic	0.0338				1584.27
S Ocean	oxic	0.0354	1.7			1687.9
S Ocean	oxic	0.037				1727.75
S Ocean	oxic	0.0388				1581.01
S Ocean	oxic	0.0403				1421.05
S Ocean	oxic	0.0415	1.93			1479.04
S Ocean	oxic	0.043				1424.39
S Ocean	oxic	0.0447				2751.63
S Ocean	oxic	0.0464				1502.59
S Ocean	oxic	0.0479	2.2			1561.8
S Ocean	oxic	0.0492				1553.1
S Ocean	oxic	0.0503	1.6			1732
S Ocean	oxic	0.0518				2102.86
S Ocean	oxic	0.0534	1.3			1785.34
S Ocean	oxic	0.0547				1433.2
S Ocean	oxic	0.0559	1.3			1934.88
S Ocean	oxic	0.0573	1.3			2398.99
S Ocean	oxic	0.0592	2.37			2976.74
S Ocean	oxic	0.0606				586.957
S Ocean	oxic	0.061	2.38			430.793
S Ocean	oxic	0.0615				489.945
S Ocean	oxic	0.0622	2.9			540.486
S Ocean	oxic	0.0628				580.972
S Ocean	oxic	0.0635	2.9			646.154
S Ocean	oxic	0.0643				615.73
S Ocean	oxic	0.065				595.794
S Ocean	oxic	0.0657	2.9			591.422
S Ocean	oxic	0.0051	0.9			617.954
S Ocean	oxic	0.0084	0.7			527.738
S Ocean	oxic	0.0103	0.6			356.753
S Ocean	oxic	0.0115	0.4			251.312
S Ocean	oxic	0.0123	0.4			202.74
S Ocean	oxic	0.0131	0.4			254.325
S Ocean	oxic	0.0142	0.4			196.1
S Ocean	oxic	0.016	2.2			304.511
S Ocean	oxic	0.0186	3.7			205.767
S Ocean	oxic	0.0213	3			177.546
S Ocean	oxic	0.0239	4.9			99.1217
S Ocean	oxic	0.0278	3.7			329.268
S Ocean	oxic	0.0324	3.7			264.188
S Ocean	oxic	0.0367	2.5			300
S Ocean	oxic	0.0409	2.7			295.956
S Ocean	oxic	0.0448	2.9			305.284
S Ocean	oxic	0.0487	3.4			318.261
S Ocean	oxic	0.0524	2.9			273.187
S Ocean	oxic	0.0557	3.9			230.567
S Ocean	oxic	0.0589	3.4			313.88
S Ocean	oxic	0.0621	2.9			297.753
S Ocean	oxic	0.0654	3.4			268.333
S Ocean	oxic	0.0687	3			244.083
S Ocean	oxic	0.0718	2.8			266.764
S Ocean	oxic	0.0739	4.3			218.126
S Ocean	oxic	0.0761	4			567.944
S Ocean	oxic	0.0796	2.2			839.744
S Ocean	oxic	0.0828	1.3			974.063
S Ocean	oxic	0.0853	1.8			1102.24
S Ocean	oxic	0.0879	4.4			653.061
S Ocean	oxic	0.0905	2.9			657.407
S Ocean	oxic	0.093	2.4			574.751
S Ocean	oxic	0.0954	1.9			653.295
S Ocean	oxic	0.0975	0.9			746.193
S Ocean	oxic	0.0996	1.6			767.507
S Ocean	oxic	0.1017	1.8			834.688
S Ocean	oxic	0.1038	2.1			879.31
S Ocean	oxic	0.1065	2.6			908.451
S Ocean	oxic	0.1095	2.6			875
S Ocean	oxic	0.1123	1.9			1400
S Ocean	oxic	0.1152	0.7			1946.84
S Ocean	oxic	0.1175	0.4			1876.64
S Ocean	oxic	0.1195	0.4			1685.19
S Ocean	oxic	0.1215	0.4			1383.66
S Ocean	oxic	0.123	0.4			1004.61
S Ocean	oxic	0.1248	0.4			1194.61
S Ocean	oxic	0.1267	0.4			1267.96
S Ocean	oxic	0.128	0.4			935.389
S Ocean	oxic	0.1293	0.4			664.298
S Ocean	oxic	0.1313	2.4			742.671
S Ocean	oxic	0.1378	4.1			301.282
S Ocean	oxic	0.1421	3.4			578.804
Black Sea	anoxic	5.5e-05	7.57059	0.56	263	0
Black Sea	anoxic	0.00044	7.78235	0.74	277	0
Black Sea	anoxic	0.00066	7.99412	0.9	270	0
Black Sea	anoxic	0.00088	7.46471	1.26	287	0
Black Sea	anoxic	0.0011	7.78235	0.7	306	0
Black Sea	anoxic	0.000101538	6.93529	0.86	192	0
Black Sea	anoxic	0.000162462	2.61529	2.85	336	215.696
Black Sea	anoxic	0.000284308	6.93529	0.48	192	0
Black Sea	anoxic	0.000406154	2.43	2.15	328	216.22
Black Sea	anoxic	0.000467077	6.3	3.7	931	641.2
Black Sea	anoxic	0.000609231	7.46471	1.22	357	13.6235
Black Sea	anoxic	0.000812308	7.30588	1.77	396	59.9294
Black Sea	anoxic	0.00101538	7.83529	1.17	372	11.5765
Black Sea	anoxic	0.00121846	7.78235	1.62	401	43.0118
Black Sea	anoxic	0.00168588	7.35882	5.74	894	555.494
Black Sea	anoxic	0.00241765	7.14706	5.55	486	157.235
Black Sea	anoxic	0.00314941	6.19412	12.3	317	32.0706
Black Sea	anoxic	0.00388118	6.19412	8.22	304	19.0706
Black Sea	anoxic	0.00424706	6.56471	2.67	389	87.0235
Black Sea	anoxic	0.00497882	7.2	0.3	297	0
Black Sea	anoxic	4.71429e-05	6.72353	1.19	276	0
Black Sea	anoxic	0.000141429	8.1	1.09	312	0
Black Sea	anoxic	0.000254571	7.72941	0.81	303	0
Black Sea	anoxic	0.000424286	6.51176	1.14	385	85.4588
Black Sea	anoxic	0.000565714	8.25882	1.06	328	0
Black Sea	anoxic	0.000612857	7.04118	0.36	243	0
Black Sea	anoxic	0.000801429	6.88235	0.8	283	0
Black Sea	anoxic	0.000942857	7.46471	0.97	276	0
Black Sea	anoxic	0.000980571	7.57059	1.47	278	0
Black Sea	anoxic	0.00123514	6.88235	0.86	269	0
Black Sea	anoxic	0.00132	6.45882	0.66	232	0
Black Sea	anoxic	0.00158657	7.99412	4.77	280	0
Black Sea	anoxic	0.00203086	7.51765	0.71	280	0
Black Sea	anoxic	0.00309714	7.67647	0.94	326	0
Black Sea	anoxic	0.00469657	6.61765	0.86	238	0
Black Sea	anoxic	0.00665143	6.77647	0.72	276	0
Black Sea	anoxic	0.00842857	6.61765	0.46	351	46.5882
Black Sea	anoxic	0.0102057	6.51176	0.91	351	51.4588
Black Sea	anoxic	2.64e-05	6.19412	1.27	272	0
Black Sea	anoxic	9.24e-05	6.08824	0.63	276	0
Black Sea	anoxic	0.0002244	6.40588	0.76	254	0
Black Sea	anoxic	0.0003564	6.3	0.71	275	0
Black Sea	anoxic	0.0004884	6.77647	0.4	240	0
Black Sea	anoxic	0.000594	6.19412	0.29	257	0
Black Sea	anoxic	0.0008316	6.45882	0.37	244	0
Black Sea	anoxic	1.65e-05	7.46471	1.45	232	0
Black Sea	anoxic	0.0001155	6.61765	1.09	234	0
Black Sea	anoxic	0.00028875	7.51765	0.85	256	0
Black Sea	anoxic	0.00045375	7.83529	0.67	320	0
Black Sea	anoxic	0.00061875	8.25882	0.01	300	0
Black Sea	anoxic	0.00078375	7.2	0.79	307	0
Black Sea	anoxic	0.00094875	7.2	1.32	347	15.8
Black Sea	anoxic	0.0011055	7.41176	1.02	330	0
Black Sea	anoxic	0.0012705	7.72941	1.51	324	0
Black Sea	anoxic	0.00180378	7.62353	1.78	291	0
Black Sea	anoxic	0.00249489	6.93529	2.55	213	0
Black Sea	anoxic	0.003186	6.67059	3.13	263	0
Black Sea	anoxic	0.00425722	5.34706	1.77	351	105.035
Black Sea	anoxic	0.00494833	6.51176	1.14	269	0
Black Sea	anoxic	0.00563944	4.56882	0.51	283	72.8341
Black Sea	anoxic	0.00702167	5.92941	0.45	320	47.2471
Black Sea	anoxic	0.00874944	7.41176	0.42	341	0.0588235
Black Sea	anoxic	0.0108228	6.19412	0.63	313	28.0706
Black Sea	anoxic	0.0128961	7.04118	0.01	347	23.1059
Black Sea	anoxic	0.0149694	8.20588	0.53	421	43.5294
Black Sea	anoxic	0.0170428	7.51765	0.38	382	36.1882
Black Sea	anoxic	0.0191161	7.25294	0.47	372	38.3647
Black Sea	anoxic	0.0210167	6.67059	0.65	333	26.1529
Black Sea	anoxic	3.52e-05	6.45882	6.56	432	134.894
Black Sea	anoxic	0.000264	4.81235	0.65	136	0
Black Sea	anoxic	0.00044	4.06059	0.53	92	0
Black Sea	anoxic	0.000792	4.88118	0.51	268	43.4659
Black Sea	anoxic	0.001144	5.4	0.46	267	18.6
Black Sea	anoxic	0.001631	5.66471	0.12	285	24.4235
Black Sea	anoxic	0.002253	5.77059	0.19	308	42.5529
Black Sea	anoxic	0.002875	6.03529	0.19	306	28.3765
Black Sea	anoxic	0.003808	5.4	0.38	288	39.6
Black Sea	anoxic	0.00443	5.87647	0.46	305	34.6824
Black Sea	anoxic	0.005363	5.55882	0.34	282	26.2941
Black Sea	anoxic	0.006296	5.66471	0.01	304	43.4235
Black Sea	anoxic	0.007229	5.50588	0.09	293	39.7294
Black Sea	anoxic	0.008162	5.77059	0.26	329	63.5529
Black Sea	anoxic	0.009095	5.92941	0.04	310	37.2471
Black Sea	anoxic	0.010028	5.45294	0.01	292	41.1647
Black Sea	anoxic	0.010961	5.71765	0.67	294	30.9882
Black Sea	anoxic	0.0111787	5.66471	0.61	317	56.4235
Black Sea	anoxic	0.0129825	6.24706	0.62	347	59.6353
Black Sea	anoxic	0.0148485	6.40588	0.67	336	41.3294
Black Sea	anoxic	0.0167145	5.87647	0.21	348	77.6824
Black Sea	anoxic	0.0188293	5.66471	0.44	288	27.4235
Black Sea	anoxic	0.0204465	6.14118	0.88	352	69.5059
Black Sea	anoxic	0.0223125	5.4	0.62	333	84.6
Black Sea	anoxic	0.00654988	6.14118	0.2	291	8.50588
Black Sea	anoxic	0.0067022	6.35294	0.5	314	21.7647
Black Sea	anoxic	0.00690531	6.24706	0.45	347	59.6353
Black Sea	anoxic	0.00728612	6.98824	0.48	371	49.5412
Black Sea	anoxic	0.00766694	6.77647	0.13	391	79.2824
Black Sea	anoxic	0.00817469	7.2	0.37	400	68.8
Black Sea	anoxic	0.00944408	7.67647	0.41	405	51.8824
Black Sea	anoxic	0.0109673	7.88824	0.26	440	77.1412
Black Sea	anoxic	0.0123637	8.41765	0.31	456	68.7882
Black Sea	anoxic	0.01376	7.99412	0.22	451	83.2706
Black Sea	anoxic	0.0152833	8.25882	0.33	458	78.0941
Black Sea	anoxic	0.0168065	8.1	0.33	467	94.4
Black Sea	anoxic	0.0183298	7.83529	0.3	447	86.5765
Black Sea	anoxic	0.0195992	7.99412	0.29	399	31.2706
Black Sea	anoxic	0.0211224	7.94118	0.15	412	46.7059
Black Sea	anoxic	0.0228996	8.15294	0.33	359	0
Black Sea	anoxic	0.024169	7.46471	0.28	395	51.6235
Black Sea	anoxic	0.0254384	8.04706	0.27	397	26.8353
Black Sea	anoxic	0.0267078	8.1	0.3	405	32.4
Black Sea	anoxic	0.0275963	7.67647	0.22	418	64.8824
Black Sea	anoxic	0.000125714	3.19235	3.68	275	128.152
Black Sea	anoxic	0.000251429	2.30294	5.36	342	236.065
Black Sea	anoxic	0.000502857	7.51765	1.7	382	36.1882
Black Sea	anoxic	0.000754286	6.19412	3.09	777	492.071
Black Sea	anoxic	0.000942857	5.77059	6.88	1594	1328.55
Black Sea	anoxic	0.00100571	7.72941	1.2	300	0
Black Sea	anoxic	0.001232	7.35882	1.37	352	13.4941
Black Sea	anoxic	0.00157388	6.45882	7.94	442	144.894
Black Sea	anoxic	0.00208163	6.51176	10.28	214	0
Black Sea	anoxic	0.00258939	6.77647	2.28	358	46.2824
Black Sea	anoxic	0.00309714	8.89412	0.84	392	0
Black Sea	anoxic	0.0036049	7.88824	1.93	304	0
Black Sea	anoxic	0.00411265	8.36471	1.25	362	0
Black Sea	anoxic	0.00462041	5.45294	1.27	264	13.1647
Black Sea	anoxic	0.00512816	5.4	1.09	275	26.6
Black Sea	anoxic	0.00563592	5.50588	0.33	264	10.7294
Black Sea	anoxic	0.00614367	8.52353	0.53	450	57.9176
Black Sea	anoxic	5.5e-05	6.61765	1.5	264	0
Black Sea	anoxic	0.000165	5.98235	1.74	239	0
Black Sea	anoxic	0.000352	5.71765	1.63	215	0
Black Sea	anoxic	0.00055	7.72941	1.16	418	62.4471
Black Sea	anoxic	0.00077	8.52353	0.88	395	2.91765
Black Sea	anoxic	0.00099	7.78235	1.66	356	0
Black Sea	anoxic	0.00121	8.36471	1.92	311	0
Black Sea	anoxic	0.00179846	7.78235	4.15	336	0
Black Sea	anoxic	0.00275538	8.04706	2.05	275	0
Black Sea	anoxic	0.00323385	6.82941	2	319	4.84706
Black Sea	anoxic	0.00347308	7.99412	1.12	257	0
Black Sea	anoxic	0.00443	6.77647	0.37	283	0
Black Sea	anoxic	0.00519554	7.72941	0.43	356	0.447059
Black Sea	anoxic	0.00548262	7.2	0.49	313	0
Black Sea	anoxic	0.00596108	7.35882	0.51	341	2.49412
Black Sea	anoxic	2.49057e-05	7.09412	1.37	216	0
Black Sea	anoxic	7.4717e-05	6.24706	1.45	226	0
Black Sea	anoxic	0.000159396	7.2	1.04	223	0
Black Sea	anoxic	0.000293887	6.51176	1.03	232	0
Black Sea	anoxic	0.000343698	5.61176	1.5	231	0
Black Sea	anoxic	0.000398491	6.98824	1.1	262	0
Black Sea	anoxic	0.000498113	6.82941	1.36	314	0
Black Sea	anoxic	0.000597736	6.93529	0.78	247	0
Black Sea	anoxic	0.000637585	5.87647	0.69	239	0
Black Sea	anoxic	0.000697358	6.61765	0.55	241	0
Black Sea	anoxic	0.000821887	6.98824	1.02	288	0
Black Sea	anoxic	0.000921509	7.35882	1.08	274	0
Black Sea	anoxic	0.00102113	6.88235	0.81	269	0
Black Sea	anoxic	0.00112075	7.41176	0.84	298	0
Black Sea	anoxic	0.00123034	7.62353	0.79	285	0
Black Sea	anoxic	0.00132	7.62353	1.03	305	0
Black Sea	anoxic	3.38462e-05	6.40588	1.25	219	0
Black Sea	anoxic	0.000101538	6.77647	1.29	242	0
Black Sea	anoxic	0.000148923	6.40588	2.72	175	0
Black Sea	anoxic	0.000270769	6.24706	2.53	188	0
Black Sea	anoxic	0.000406154	6.93529	1.33	267	0
Black Sea	anoxic	0.000541538	6.24706	1.03	235	0
Black Sea	anoxic	0.000676923	6.88235	0.77	238	0
Black Sea	anoxic	0.000812308	6.45882	0.78	269	0
Black Sea	anoxic	0.000947692	6.72353	0.66	274	0
Black Sea	anoxic	0.00108308	6.88235	0.69	272	0
Black Sea	anoxic	0.00121846	7.30588	0.56	304	0
Black Sea	anoxic	0.00132	6.98824	0.63	315	0
Iceland Basin	oxic	1.06002	6.06176	0.34	201.84	0
Iceland Basin	oxic	0.00197	5.4	0.64	463.34	247.34
Iceland Basin	oxic	0.00902	5.98235	0.69	545.88	306.586
Iceland Basin	oxic	0.03495	7.23706	0.29	559.38	269.898
Iceland Basin	oxic	0.04985	7.87235	0.3	586.58	271.686
Iceland Basin	oxic	0.11807	5.59588	0.28	502.81	278.975
Iceland Basin	oxic	0.12373	5.71235	0.38	383.8	155.306
Iceland Basin	oxic	0.13133	7.89882	0.33	479.86	163.907
Iceland Basin	oxic	0.32732	6.73412	0.25	432.19	162.825
Iceland Basin	oxic	0.34763	8.34882	0.29	365.37	31.4171
Iceland Basin	oxic	0.39597	6.33706	0.19	532.53	279.048
Iceland Basin	oxic	0.40567	5.52176	0.4	433.71	212.839
Iceland Basin	oxic	0.41723	6.05647	0.65	428.3	186.041
Iceland Basin	oxic	0.79074	5.98765	0.36	416.3	176.794
Iceland Basin	oxic	0.79454	6.68647	0.27	396.63	129.171
Iceland Basin	oxic	0.85798	7.22118	0.21	589.16	300.313
Iceland Basin	oxic	0.87362	5.97706	0.45	432.41	193.328
Iceland Basin	oxic	0.94188	5.67529	0.28	400.83	173.818
Iceland Basin	oxic	0.955	7.35353	0.12	258.25	0
Iceland Basin	oxic	1.01879	7.32176	0.21	346.82	53.9494
Iceland Basin	oxic	0.16591	7.75588	0.3	466.01	155.775
Iceland Basin	oxic	0.24832	8.08941	0.22	432.8	109.224
Iceland Basin	oxic	0.52098	4.90235	0.46	467.75	271.656
Iceland Basin	oxic	0.60355	6.72353	0.22	627.25	358.309
Iceland Basin	oxic	0.67693	8.05765	0.28	453.98	131.674
Iceland Basin	oxic	0.70386	6.16235	0.27	389.91	143.416
Iceland Basin	oxic	0.82622	6.05118	0.13	333.1	91.0529
Iceland Basin	oxic	0.83428	6.37941	0.24	262.57	7.39353
Iceland Basin	oxic	0.84992	5.28882	0.23	415.44	203.887
Iceland Basin	oxic	0.8895	8.11059	0.23	366.74	42.3165
Iceland Basin	oxic	0.90562	7.89882	0.4	462.02	146.067
Iceland Basin	oxic	0.91747	7.50706	0.12	182.85	0
Iceland Basin	oxic	0.92648	6.80294	0.14	416.29	144.172
Iceland Basin	oxic	0.97128	6.37941	0.2	357.33	102.154
Iceland Basin	oxic	0.98186	7.90412	0.19	447	130.835
Iceland Basin	oxic	1.00552	7.56529	0.2	301.11	0
Iceland Basin	oxic	1.084	6.84	0.17	235.68	0
Iceland Basin	oxic	1.10994	7.61824	0.28	227.635	0
Iceland Basin	oxic	1.12258	7.82471	0.21	219.59	0
Iceland Basin	oxic	0.07812	5.31529	0.23	558.1	345.488
Iceland Basin	oxic	0.09132	7.34294	0.36	442.37	148.652
Iceland Basin	oxic	0.10452	5.94	0.27	468.6	231
Iceland Basin	oxic	0.18626	7.37471	0.2	351.55	56.5618
Iceland Basin	oxic	0.21116	6.16765	0.3	443.74	197.034
Iceland Basin	oxic	0.2254	7.61294	0.26	256.43	0
Iceland Basin	oxic	0.23714	5.86059	0.27	386.56	152.136
Iceland Basin	oxic	0.29185	7.07294	0.2	339.88	56.9624
Iceland Basin	oxic	0.30469	6.25235	0.22	311.86	61.7659
Iceland Basin	oxic	0.31178	6.51176	0.24	372.025	111.554
Iceland Basin	oxic	0.36248	6.57	0.32	386.72	123.92
Iceland Basin	oxic	0.3679	6.97765	0.27	359.19	80.0841
Iceland Basin	oxic	0.37754	5.58	0.31	287.8	64.6
Iceland Basin	oxic	0.43558	7.92529	0.2	384.86	67.8482
Iceland Basin	oxic	0.4595	6.85588	0.21	272.83	0
Iceland Basin	oxic	0.46602	4.48941	0.3	364.03	184.454
Iceland Basin	oxic	0.48946	6.05118	0.35	397.76	155.713
Iceland Basin	oxic	0.54793	6.85059	0.29	289.54	15.5165
Iceland Basin	oxic	0.55599	6.23118	0.36	358.08	108.833
Iceland Basin	oxic	0.57163	6.40588	0.22	386.67	130.435
Iceland Basin	oxic	0.57965	6.62294	0.24	429.62	164.702
Iceland Basin	oxic	0.5872	7.07294	0.21	304	21.0824
Iceland Basin	oxic	0.61672	6.86118	0.37	576.3	301.853
Iceland Basin	oxic	0.63989	8.49176	0.24	359.68	20.0094
Iceland Basin	oxic	0.72148	8.13706	0.33	398.93	73.4476
Iceland Basin	oxic	0.76316	7.98882	0.15	431.16	111.607
North Pacific	oxic	0.0086	4.6279		1841	1540.19
North Pacific	oxic	0.0089732	4.4813		1652	1360.72
North Pacific	oxic	0.0098655	4.2727		1477	1199.27
North Pacific	oxic	0.01046	4.3165		1548	1267.43
North Pacific	oxic	0.011055	4.2247		1345	1070.39
North Pacific	oxic	0.011353	4.2922		1359	1080.01
North Pacific	oxic	0.011612	4.5183		1359	1065.31
North Pacific	oxic	0.012105	4.7583		1452	1142.71
North Pacific	oxic	0.012844	4.5866		959	660.871
North Pacific	oxic	0.013091	3.6177		983	747.85
North Pacific	oxic	0.013461	3.664		962	723.84
North Pacific	oxic	0.013707	3.9036		1019	765.266
North Pacific	oxic	0.014077	4.4631		1011	720.899
North Pacific	oxic	0.014324	5.2149		1100	761.032
North Pacific	oxic	0.014693	5.2417		1245	904.29
North Pacific	oxic	0.014964	7.4667		1205	719.664
North Pacific	oxic	0.015404	7.6103		1208	713.331
North Pacific	oxic	0.015698	7.5401		1101	610.894
North Pacific	oxic	0.016138	7.2348		1104	633.738
North Pacific	oxic	0.016431	7.4947		1077	589.844
North Pacific	oxic	0.016872	7.6955		1028	527.793
North Pacific	oxic	0.017459	7.5151		1037	548.518
North Pacific	oxic	0.017606	7.7117		1051	549.739
North Pacific	oxic	0.017899	7.4791		1031	544.859
North Pacific	oxic	0.01834	7.5319		1003	513.427
North Pacific	oxic	0.0188514	7.2112		1013	544.272
North Pacific	oxic	0.0195608	7.2675		1057	584.612
North Pacific	oxic	0.0200338	7.2266		1050	580.271
North Pacific	oxic	0.0207432	7.4407		1059	575.355
North Pacific	oxic	0.0212162	6.946		1008	556.51
North Pacific	oxic	0.0219256	7.2982		1040	565.617
North Pacific	oxic	0.0223986	7.355		1043	564.925
North Pacific	oxic	0.023108	7.4135		1048	566.122
North Pacific	oxic	0.023581	7.3808		1030	550.248
North Pacific	oxic	0.0242904	7.2675		1072	599.612
North Pacific	oxic	0.0247634	7.4365		1074	590.628
North Pacific	oxic	0.0254728	7.2978		1154	679.643
North Pacific	oxic	0.0259458	7.1635		1062	596.372
North Pacific	oxic	0.0266552	7.3816		1101	621.196
North Pacific	oxic	0.0271282	7.0462		1037	578.997
North Pacific	oxic	0.0278376	7.4996		1071	583.526
North Pacific	oxic	0.0283106	7.5886		1018	524.741
North Pacific	oxic	0.0313848	7.3831		995	515.099
North Pacific	oxic	0.0318578	7.4559		930	445.367
North Pacific	oxic	0.0325672	7.4731		957	471.249
North Pacific	oxic	0.0337496	7.2594		1039	567.139
North Pacific	oxic	0.0342226	7.465		1065	579.775
North Pacific	oxic	0.034932	7.5344		1091	601.264
North Pacific	oxic	0.035739	7.117		1138	675.395
North Pacific	oxic	0.036876	7.3856		1072	591.936
North Pacific	oxic	0.038499	7.2578		1136	664.243
North Pacific	oxic	0.039798	7.1666		1236	770.171
North Pacific	oxic	0.043319	6.988		1295	840.78
North Pacific	oxic	0.050452	6.857		924	478.295
North Pacific	oxic	0.051916	6.5449		1288	862.582
North Pacific	oxic	0.055143	6.9483		1214	762.361
North Pacific	oxic	0.05837	5.9305		1189	803.517
North Pacific	oxic	0.061348	6.5647		1233	806.294
North Pacific	oxic	0.062882	7.4657		1128	642.729
North Pacific	oxic	0.063648	6.921		1152	702.135
North Pacific	oxic	0.064109	7.3186		1027	551.291
North Pacific	oxic	0.065157	7.2918		918	444.033
North Pacific	oxic	0.066751	7.322		938	462.07
North Pacific	oxic	0.067017	6.6251		912	481.369
North Pacific	oxic	0.068346	6.3673		1048	634.125
North Pacific	oxic	0.069675	5.6304		944	578.024
North Pacific	oxic	0.073663	5.4224		1174	821.544
North Pacific	oxic	0.076321	6.7596		1203	763.626
North Pacific	oxic	0.07765	6.0589		1393	999.171
North Pacific	oxic	0.081117	6.1054		1235	838.149
North Pacific	oxic	0.082427	6.6947		1362	926.844
North Pacific	oxic	0.091167	3.9778		1044	785.443
North Pacific	oxic	0.096869	3.8244		1047	798.414
North Pacific	oxic	0.10137	3.8365		1130	880.628
North Pacific	oxic	0.1031	6.0999		1232	835.506
North Pacific	oxic	0.10791	6.7964		1246	804.234
North Pacific	oxic	0.10988	7.1938		1134	666.403
North Pacific	oxic	0.11225	6.6371		1163	731.589
North Pacific	oxic	0.11596	5.865		1335	953.775
North Pacific	oxic	0.12021	5.2814		1558	1214.71
North Pacific	oxic	0.1234	5.1402		1579	1244.89
North Pacific	oxic	0.12548	4.45		1826	1536.75
North Pacific	oxic	0.12744	4.9399		1965	1643.91
North Pacific	oxic	0.12811	5.3333		1890	1543.34
North Pacific	oxic	0.12918	5.2659		1747	1404.72
North Pacific	oxic	0.13061	5.6586		1539	1171.19
North Pacific	oxic	0.1324	6.1425		1437	1037.74
North Pacific	oxic	0.13311	6.1517		1350	950.139
North Pacific	oxic	0.13347	6.0703		1350	955.431
North Pacific	oxic	0.13383	6.2463		1567	1160.99
North Pacific	oxic	0.13419	6.4067		1538	1121.56
North Pacific	oxic	0.1349	6.1459		1556	1156.52
North Pacific	oxic	0.13593	6.2093		1551	1147.4
North Pacific	oxic	0.13773	5.2556		1089	747.386
North Pacific	oxic	0.13914	6.2578		1038	631.243
North Pacific	oxic	0.13961	6.597		845	416.195
North Pacific	oxic	0.14008	7.5242		913	423.927
North Pacific	oxic	0.14044	7.2145		994	525.058
North Pacific	oxic	0.14093	7.9594		1020	502.639
North Pacific	oxic	0.14117	6.508		1155	731.98
North Pacific	oxic	0.14142	7.0059		1054	598.617
North Pacific	oxic	0.14239	7.444		1040	556.14
North Pacific	oxic	0.14483	7.2725		1093	620.288
North Pacific	oxic	0.14849	6.9218		890	440.083
North Pacific	oxic	0.14971	7.366		1008	529.21
SE Pacific	oxic	0.0045	0.07		1294	1289.45
SE Pacific	oxic	0.0133	0.0738		1101	1096.2
SE Pacific	oxic	0.0183	0.067		1222	1217.64
SE Pacific	oxic	0.0228	0.0733		1261	1256.24
SE Pacific	oxic	0.0273	0.083		1361	1355.61
SE Pacific	oxic	0.0318	0.0801		1319	1313.79
SE Pacific	oxic	0.0363	0.0691		1210	1205.51
SE Pacific	oxic	0.0408	0.0742		1189	1184.18
SE Pacific	oxic	0.0453	0.0746		1154	1149.15
SE Pacific	oxic	0.0498	0.0763		1284	1279.04
SE Pacific	oxic	0.0544	0.0792		1294	1288.85
SE Pacific	oxic	0.0589	0.0704		1287	1282.42
SE Pacific	oxic	0.0634	0.0717		1397	1392.34
SE Pacific	oxic	0.0679	0.0771		1478	1472.99
SE Pacific	oxic	0.0724	0.083		1497	1491.61
SE Pacific	oxic	0.0769	0.0851		1626	1620.47
SE Pacific	oxic	0.0814	0.0818		1702	1696.68
SE Pacific	oxic	0.0859	0.0805		1764	1758.77
SE Pacific	oxic	0.0904	0.0729		1508	1503.26
SE Pacific	oxic	0.1039	0.0746		1465	1460.15
SE Pacific	oxic	0.1084	0.0822		1837	1831.66
SE Pacific	oxic	0.113	0.086		1812	1806.41
SE Pacific	oxic	0.1219	0.0969		1667	1660.7
SE Pacific	oxic	0.1239	0.091		1520	1514.09
SE Pacific	oxic	0.126	0.0914		1442	1436.06
SE Pacific	oxic	0.128	0.0885		1288	1282.25
SE Pacific	oxic	0.13	0.0927		1403	1396.97
SE Pacific	oxic	0.1321	0.0897		1105	1099.17
SE Pacific	oxic	0.1361	0.0872		1165	1159.33
SE Pacific	oxic	0.1382	0.0801		1105	1099.79
SE Pacific	oxic	0.1402	0.0834		1283	1277.58
SE Pacific	oxic	0.1422	0.0797		1165	1159.82
SE Pacific	oxic	0.1443	0.0855		1231	1225.44
SE Pacific	oxic	0.1463	0.0784		1283	1277.9
SE Pacific	oxic	0.1483	0.0738		1231	1226.2
SE Pacific	oxic	0.1565	0.0717		1274	1269.34
SE Pacific	oxic	0.1646	0.0754		1334	1329.1
SE Pacific	oxic	0.1687	0.0733		1357	1352.24
SE Pacific	oxic	0.1727	0.0746		1385	1380.15
SE Pacific	oxic	0.1768	0.0742		1355	1350.18
SE Pacific	oxic	0.1809	0.0834		1498	1492.58
SE Pacific	oxic	0.1849	0.0733		1398	1393.24
SE Pacific	oxic	0.191	0.0746		1474	1469.15
SE Pacific	oxic	0.1941	0.0729		1541	1536.26
SE Pacific	oxic	0.1971	0.0965		1773	1766.73
SE Pacific	oxic	0.2002	0.0897		1720	1714.17
SE Pacific	oxic	0.2033	0.075		1375	1370.12
SE Pacific	oxic	0.2063	0.0944		1460	1453.86
SE Pacific	oxic	0.2094	0.096		1287	1280.76
SE Pacific	oxic	0.2124	0.1032		1388	1381.29
SE Pacific	oxic	0.2155	0.0805		1427	1421.77
SE Pacific	oxic	0.2185	0.0906		1520	1514.11
SE Pacific	oxic	0.2216	0.0733		1343	1338.24
SE Pacific	oxic	0.2246	0.0691		1376	1371.51
SE Pacific	oxic	0.2277	0.0754		1373	1368.1
SE Pacific	oxic	0.2307	0.0712		1486	1481.37
SE Pacific	oxic	0.2338	0.0633		1331	1326.89
SE Pacific	oxic	0.2368	0.0574		1285	1281.27
SE Pacific	oxic	0.2399	0.0624		1318	1313.94
SE Pacific	oxic	0.2429	0.0591		944	940.159
SE Pacific	oxic	0.246	0.0775		1106	1100.96
SE Pacific	oxic	0.249	0.0662		1055	1050.7
SE Pacific	oxic	0.2582	0.0696		1123	1118.48
SE Pacific	oxic	0.2612	0.0754		1120	1115.1
SE Pacific	oxic	0.2643	0.0771		1235	1229.99
SE Pacific	oxic	0.2673	0.0792		1307	1301.85
SE Pacific	oxic	0.2704	0.0855		1458	1452.44
SE Pacific	oxic	0.2734	0.0897		1534	1528.17
SE Pacific	oxic	0.2765	0.0902		1617	1611.14
SE Pacific	oxic	0.2826	0.0725		1456	1451.29
SE Pacific	oxic	0.2856	0.0582		1182	1178.22
SE Pacific	oxic	0.2887	0.0662		1230	1225.7
SE Pacific	oxic	0.2917	0.0691		1318	1313.51
SE Pacific	oxic	0.2948	0.0717		1377	1372.34
SE Pacific	oxic	0.2978	0.0763		1383	1378.04
SE Pacific	oxic	0.3009	0.0721		1351	1346.31
SE Pacific	oxic	0.3039	0.0675		1332	1327.61
SE Pacific	oxic	0.307	0.0679		1296	1291.59
SE Pacific	oxic	0.31	0.0889		1421	1415.22
SE Pacific	oxic	0.3131	0.0729		1381	1376.26
SE Pacific	oxic	0.3161	0.0775		1400	1394.96
SE Pacific	oxic	0.3192	0.0628		1197	1192.92
SE Pacific	oxic	0.3222	0.0683		1268	1263.56
SE Pacific	oxic	0.3253	0.0553		1160	1156.41
SE Pacific	oxic	0.3283	0.0507		922	918.705
SE Pacific	oxic	0.3314	0.0599		1124	1120.11
SE Pacific	oxic	0.3344	0.0607		874	870.054
SE Pacific	oxic	0.3375	0.0662		916	911.697
SE Pacific	oxic	0.3405	0.0649		946	941.782
SE Pacific	oxic	0.3436	0.0687		1002	997.534
SE Pacific	oxic	0.3467	0.0708		1039	1034.4
SE Pacific	oxic	0.3497	0.0645		998	993.808
SE Pacific	oxic	0.3528	0.0679		1020	1015.59
SE Pacific	oxic	0.3589	0.0696		989	984.476
SE Pacific	oxic	0.362	0.0712		1119	1114.37
SE Pacific	oxic	0.3651	0.0729		1250	1245.26
SE Pacific	oxic	0.3681	0.0771		1374	1368.99
SE Pacific	oxic	0.3712	0.0763		1401	1396.04
SE Pacific	oxic	0.3743	0.0843		1426	1420.52
SE Pacific	oxic	0.3773	0.0834		1373	1367.58
SE Pacific	oxic	0.3804	0.078		1453	1447.93
SE Pacific	oxic	0.3835	0.0826		1462	1456.63
SE Pacific	oxic	0.3865	0.0775		1533	1527.96
SE Pacific	oxic	0.3896	0.078		1816	1810.93
SE Pacific	oxic	0.3927	0.083		1792	1786.61
SE Pacific	oxic	0.3957	0.0708		1622	1617.4
SE Pacific	oxic	0.4019	0.0725		1288	1283.29
SE Pacific	oxic	0.4049	0.054		1092	1088.49
SE Pacific	oxic	0.408	0.0612		1070	1066.02
SE Pacific	oxic	0.4238	0.0637		1011	1006.86
SE Pacific	oxic	0.4301	0.0641		906	901.833
SE Pacific	oxic	0.4365	0.0662		1018	1013.7
SE Pacific	oxic	0.4396	0.0637		1120	1115.86
SE Pacific	oxic	0.4428	0.07		1142	1137.45
SE Pacific	oxic	0.4459	0.0637		990	985.86
SE Pacific	oxic	0.4523	0.0557		942	938.38
SE Pacific	oxic	0.4554	0.0645		957	952.808
SE Pacific	oxic	0.4586	0.0675		1070	1065.61
SE Pacific	oxic	0.4617	0.0725		1139	1134.29
SE Pacific	oxic	0.4649	0.0788		1233	1227.88
SE Pacific	oxic	0.4681	0.0839		1537	1531.55
SE Pacific	oxic	0.4744	0.0826		1505	1499.63
SE Pacific	oxic	0.4776	0.0809		1274	1268.74
SE Pacific	oxic	0.4825	0.075		1179	1174.12
SE Pacific	oxic	0.4877	0.0712		1197	1192.37
SE Pacific	oxic	0.493	0.0721		1309	1304.31
SE Pacific	oxic	0.4983	0.0717		1203	1198.34
SE Pacific	oxic	0.5036	0.0754		1076	1071.1
SE Pacific	oxic	0.5088	0.0729		1113	1108.26
SE Pacific	oxic	0.5141	0.0733		1190	1185.24
SE Pacific	oxic	0.5194	0.0733		1309	1304.24
SE Pacific	oxic	0.5247	0.0687		1169	1164.53
SE Pacific	oxic	0.5299	0.0704		1087	1082.42
SE Pacific	oxic	0.5352	0.0704		1100	1095.42
SE Pacific	oxic	0.5405	0.0696		1101	1096.48
SE Pacific	oxic	0.5458	0.0746		1288	1283.15
SE Pacific	oxic	0.551	0.0759		1220	1215.07
SE Pacific	oxic	0.5563	0.0813		1226	1220.72
SE Pacific	oxic	0.5616	0.0792		1308	1302.85
SE Pacific	oxic	0.5669	0.0767		1448	1443.01
SE Pacific	oxic	0.5717	0.0784		1517	1511.9
SE Pacific	oxic	0.5756	0.083		1516	1510.61
SE Pacific	oxic	0.5833	0.0729		1463	1458.26
SE Pacific	oxic	0.5872	0.0708		1290	1285.4
SE Pacific	oxic	0.5911	0.0725		1379	1374.29
SE Pacific	oxic	0.595	0.0763		1329	1324.04
SE Pacific	oxic	0.5989	0.083		1488	1482.61
SE Pacific	oxic	0.6028	0.0759		1465	1460.07
SE Pacific	oxic	0.6066	0.0754		1491	1486.1
SE Pacific	oxic	0.6105	0.0792		1435	1429.85
SE Pacific	oxic	0.6144	0.083		1465	1459.61
SE Pacific	oxic	0.6183	0.0733		1435	1430.24
SE Pacific	oxic	0.6222	0.0687		1461	1456.53
SE Pacific	oxic	0.6261	0.0679		1303	1298.59
SE Pacific	oxic	0.63	0.0662		947	942.697
SE Pacific	oxic	0.6342	0.067		985	980.645
SE Pacific	oxic	0.6385	0.0754		1019	1014.1
SE Pacific	oxic	0.6427	0.0704		1067	1062.42
SE Pacific	oxic	0.647	0.0742		1596	1591.18
SE Pacific	oxic	0.6512	0.0717		1157	1152.34
SE Pacific	oxic	0.6555	0.0754		1260	1255.1
SE Pacific	oxic	0.6597	0.0704		1181	1176.42
SE Pacific	oxic	0.664	0.0767		1215	1210.01
SE Pacific	oxic	0.6682	0.0788		1340	1334.88
SE Pacific	oxic	0.6725	0.0805		1481	1475.77
SE Pacific	oxic	0.6767	0.0881		1575	1569.27
SE Pacific	oxic	0.681	0.0864		1640	1634.38
SE Pacific	oxic	0.6852	0.0822		1569	1563.66
SE Pacific	oxic	0.6895	0.0822		1367	1361.66
SE Pacific	oxic	0.6937	0.0805		1285	1279.77
SE Pacific	oxic	0.698	0.0847		1266	1260.49
SE Pacific	oxic	0.7022	0.0872		1241	1235.33
SE Pacific	oxic	0.7065	0.1078		1202	1194.99
SE Pacific	oxic	0.7107	0.1162		1075	1067.45
SE Pacific	oxic	0.715	0.1007		1073	1066.45
SE Pacific	oxic	0.7192	0.0923		1081	1075
SE Pacific	oxic	0.7235	0.1091		965	957.909
SE Pacific	oxic	0.7277	0.1082		1076	1068.97
SE Pacific	oxic	0.732	0.0927		1354	1347.97
SE Pacific	oxic	0.7363	0.0893		1215	1209.2
SE Pacific	oxic	0.7405	0.0868		1378	1372.36
Eq Pacific	oxic	0.002869	0.2778	0.19	1492	1473.94
Eq Pacific	oxic	0.005053	0.2395	0.17	1443	1427.43
Eq Pacific	oxic	0.0071015	0.2184	0.28	1287	1272.8
Eq Pacific	oxic	0.00904167	0.2253	0.11	1236	1221.36
Eq Pacific	oxic	0.0109585	0.2029	0.18	1207	1193.81
Eq Pacific	oxic	0.0128693	0.2021	0.18	1266	1252.86
Eq Pacific	oxic	0.0141145	0.2077	0.24	1322	1308.5
Eq Pacific	oxic	0.015934	0.1949	0.16	1177	1164.33
Eq Pacific	oxic	0.0171755	0.2119	0.26	1116	1102.23
Eq Pacific	oxic	0.0189667	0.2308	0.28	1112	1097
Eq Pacific	oxic	0.0202395	0.2215	0.09	1031	1016.6
Eq Pacific	oxic	0.0220383	0.2306	0.19	1113	1098.01
Eq Pacific	oxic	0.023926	0.1946	0.15	1025	1012.35
Eq Pacific	oxic	0.0259147	0.1803	0.23	893	881.28
Eq Pacific	oxic	0.02793	0.1758	0.25	857	845.573
Eq Pacific	oxic	0.030105	0.1581	0.15	825	814.724
Eq Pacific	oxic	0.0331095	0.1719	0.13	798	786.827
Eq Pacific	oxic	0.0368737	0.1617	0.27	865	854.49
Eq Pacific	oxic	0.040149	0.1669	0.27	800	789.152
Eq Pacific	oxic	0.047095	0.1573	0.15	817	806.775
Eq Pacific	oxic	0.050076	0.1624	0.2	901	890.444
Eq Pacific	oxic	0.0529287	0.1516	0.14	731	721.146
Eq Pacific	oxic	0.0550815	0.1671	0.12	780	769.139
Eq Pacific	oxic	0.057185	0.185	0.12	830	817.975
Eq Pacific	oxic	0.0591647	0.2218	0.17	976	961.583
Eq Pacific	oxic	0.0617995	0.2548	0.12	1035	1018.44
Eq Pacific	oxic	0.063913	0.4173	0.09	1722	1694.88
Eq Pacific	oxic	0.0660157	0.5204	0.09	2014	1980.17
Eq Pacific	oxic	0.0681183	0.6582	0.18	2668	2625.22
Eq Pacific	oxic	0.0709815	0.6474	0.15	2607	2564.92
Eq Pacific	oxic	0.073961	0.5234	0.16	2210	2175.98
Eq Pacific	oxic	0.0770895	0.497	0.11	2017	1984.69
Eq Pacific	oxic	0.0809633	0.5609	0.21	2378	2341.54
Eq Pacific	oxic	0.0850093	0.6292	0.08	2631	2590.1
Eq Pacific	oxic	0.0898467	0.5954	0.21	2589	2550.3
Eq Pacific	oxic	0.09415	0.5558	0.16	2375	2338.87
Eq Pacific	oxic	0.0990483	0.5154	0.23	2207	2173.5
Eq Pacific	oxic	0.10394	0.5591	0.12	2406	2369.66
Eq Pacific	oxic	0.108106	0.5979	0.11	2618	2579.14
Eq Pacific	oxic	0.112184	0.6052	0.12	2689	2649.66
Eq Pacific	oxic	0.116012	0.5906	0.18	2739	2700.61
Eq Pacific	oxic	0.119182	0.3867	0.13	1958	1932.86
Eq Pacific	oxic	0.122139	0.3865	0.21	1766	1740.88
Eq Pacific	oxic	0.125156	0.3334	0.16	1373	1351.33
Eq Pacific	oxic	0.128217	0.2883	0.13	1418	1399.26
Eq Pacific	oxic	0.13114	0.2503	0.21	1421	1404.73
Eq Pacific	oxic	0.134213	0.2439	0.19	1333	1317.15
Eq Pacific	oxic	0.137127	0.2326	0.22	1325	1309.88
Eq Pacific	oxic	0.141922	0.2506	0.11	1224	1207.71
Eq Pacific	oxic	0.144141	0.252	0.06	1275	1258.62
Eq Pacific	oxic	0.146925	0.2597	0.07	1392	1375.12
Eq Pacific	oxic	0.149046	0.2644	0.23	1254	1236.81
Eq Pacific	oxic	0.151105	0.2562	0.12	1195	1178.35
Eq Pacific	oxic	0.153201	0.2896	0.21	1330	1311.18
Eq Pacific	oxic	0.155212	0.2815	0.21	1343	1324.7
Eq Pacific	oxic	0.157125	0.2846	0.22	1279	1260.5
Eq Pacific	oxic	0.159126	0.3005	0.08	1308	1288.47
Eq Pacific	oxic	0.161014	0.2907	0.11	1383	1364.1
Eq Pacific	oxic	0.162873	0.32	0.14	1449	1428.2
Eq Pacific	oxic	0.164128	0.293	0.17	1036	1016.96
Eq Pacific	oxic	0.165995	0.2997	0.12	1302	1282.52
Eq Pacific	oxic	0.167865	0.3233	0.14	1419	1397.99
Eq Pacific	oxic	0.169122	0.378	0.11	1581	1556.43
Eq Pacific	oxic	0.17099	0.4701	0.16	1897	1866.44
Eq Pacific	oxic	0.172943	0.5652	0.14	2188	2151.26
Eq Pacific	oxic	0.174951	0.7648	0.19	3126	3076.29
Eq Pacific	oxic	0.177049	1.1608	0.23	4770	4694.55
Eq Pacific	oxic	0.179875	0.8945	0.18	3334	3275.86
Eq Pacific	oxic	0.182756	1.0635	0.1	4119	4049.87
Eq Pacific	oxic	0.185969	0.8953	0.13	3733	3674.81
Eq Pacific	oxic	0.190014	0.3092	0.23	1411	1390.9
Eq Pacific	oxic	0.194963	0.7066	0.19	2795	2749.07
Eq Pacific	oxic	0.199777	0.5503	0.11	2363	2327.23
Eq Pacific	oxic	0.203	0.4653	0.17	2044	2013.76
Eq Pacific	oxic	0.207046	0.3176	0.23	1500	1479.36
Eq Pacific	oxic	0.210839	0.3162	0.16	1500	1479.45
Eq Pacific	oxic	0.213889	0.4134	0.08	1833	1806.13
Eq Pacific	oxic	0.216952	0.4356	0.17	1739	1710.69
Eq Pacific	oxic	0.21989	0.4223	0.15	1782	1754.55
Eq Pacific	oxic	0.222868	0.4789	0.22	2274	2242.87
Eq Pacific	oxic	0.225132	0.4236	0.21	1907	1879.47
Eq Pacific	oxic	0.228078	0.332	0.17	1655	1633.42
Eq Pacific	oxic	0.231102	0.3006	0.15	1337	1317.46
Eq Pacific	oxic	0.234142	0.2613	0.19	1018	1001.02
Eq Pacific	oxic	0.238012	0.2269	0.24	900	885.251
Eq Pacific	oxic	0.242	0.2809	0.19	1038	1019.74
Eq Pacific	oxic	0.246122	0.2596	0.14	1071	1054.13
Eq Pacific	oxic	0.250018	0.2187	0.2	1034	1019.78
Eq Pacific	oxic	0.253143	0.2079	0.19	978	964.486
Eq Pacific	oxic	0.255971	0.2245	0.16	960	945.408
Eq Pacific	oxic	0.258769	0.1918	0.1	1026	1013.53
Eq Pacific	oxic	0.260944	0.2803	0.16	1063	1044.78
Eq Pacific	oxic	0.26301	0.3764	0.21	1498	1473.53
Eq Pacific	oxic	0.265061	0.5934	0.15	2228	2189.43
Eq Pacific	oxic	0.267115	0.8349	0.27	3243	3188.73
Eq Pacific	oxic	0.269863	1.0755	0.28	3699	3629.09
Eq Pacific	oxic	0.27198	1.0561	0.15	3587	3518.35
Eq Pacific	oxic	0.274764	1.2395	0.25	4717	4636.43
Eq Pacific	oxic	0.277176	1.191	0.27	4062	3984.59
Eq Pacific	oxic	0.280839	0.4687	0.26	1779	1748.53
Eq Pacific	oxic	0.284039	0.4431	0.3	1757	1728.2
Eq Pacific	oxic	0.288023	0.487	0.16	1969	1937.35
Eq Pacific	oxic	0.292244	0.4567	0.18	1833	1803.31
Eq Pacific	oxic	0.297119	0.4109	0.14	1676	1649.29
Eq Pacific	oxic	0.302856	0.3864	0.21	1720	1694.88
Eq Pacific	oxic	0.308069	0.4377	0.18	1889	1860.55
Eq Pacific	oxic	0.311066	0.4187	0.07	1756	1728.78
Eq Pacific	oxic	0.315864	0.4532	0.24	1851	1821.54
Eq Pacific	oxic	0.319991	0.5558	0.16	2285	2248.87
Eq Pacific	oxic	0.322904	0.5098	0.23	2364	2330.86
Eq Pacific	oxic	0.325093	0.3554	0.19	1603	1579.9
Eq Pacific	oxic	0.327164	0.2023	0.11	1041	1027.85
Eq Pacific	oxic	0.329902	0.1668	0.28	949	938.158
Eq Pacific	oxic	0.331958	0.1661	0.2	1042	1031.2
Eq Pacific	oxic	0.334028	0.1867	0.08	881	868.865
Eq Pacific	oxic	0.33608	0.1887	0.14	746	733.735
Eq Pacific	oxic	0.338758	0.1752	0.11	708	696.612
Eq Pacific	oxic	0.340969	0.2164	0.12	951	936.934
Eq Pacific	oxic	0.343232	0.2156	0.21	946	931.986
Eq Pacific	oxic	0.346072	0.2117	0.12	1006	992.24
Eq Pacific	oxic	0.349094	0.1922	0.17	864	851.507
Eq Pacific	oxic	0.352121	0.1902	0.11	799	786.637
Eq Pacific	oxic	0.35583	0.2041	0.11	796	782.734
Eq Pacific	oxic	0.358989	0.2594	0.13	985	968.139
Eq Pacific	oxic	0.362088	0.3466	0.11	1283	1260.47
Eq Pacific	oxic	0.365083	0.3661	0.11	1354	1330.2
Eq Pacific	oxic	0.368097	0.5179	0.16	1650	1616.34
Eq Pacific	oxic	0.371016	0.5245	0.15	1826	1791.91
Eq Pacific	oxic	0.373953	0.5134	0.14	1728	1694.63
Eq Pacific	oxic	0.376893	0.5468	0.13	1802	1766.46
Eq Pacific	oxic	0.379773	0.5061	0.08	1692	1659.1
Eq Pacific	oxic	0.38216	0.6076	0.17	2025	1985.51
Eq Pacific	oxic	0.385152	0.6598	0.1	2305	2262.11
Eq Pacific	oxic	0.388131	0.5155	0.14	1947	1913.49
Eq Pacific	oxic	0.3911	0.6638	0.08	2344	2300.85
Eq Pacific	oxic	0.393941	0.7006	0.15	2518	2472.46
Eq Pacific	oxic	0.39593	1.0944	0.23	4037	3965.86
Eq Pacific	oxic	0.398853	1.2429	0.26	4851	4770.21
Eq Pacific	oxic	0.404174	0.7564	0.16	2968	2918.83
Eq Pacific	oxic	0.407843	0.3187	0.17	1601	1580.28
Eq Pacific	oxic	0.410943	0.2856	0.12	1457	1438.44
Eq Pacific	oxic	0.414122	0.2405	0.16	1126	1110.37
Eq Pacific	oxic	0.417934	0.1868	0.12	965	952.858
Eq Pacific	oxic	0.421082	0.1768	0.16	807	795.508
Eq Pacific	oxic	0.424132	0.1519	0.12	762	752.126
Eq Pacific	oxic	0.427089	0.1481	0.13	768	758.374
Eq Pacific	oxic	0.429941	0.1767	0.08	769	757.514
Eq Pacific	oxic	0.432082	0.1682	0.15	730	719.067
Eq Pacific	oxic	0.434202	0.1377	0.09	717	708.049
Eq Pacific	oxic	0.436135	0.1246	0.16	657	648.901
Eq Pacific	oxic	0.438134	0.1245	0.1	643	634.908
Eq Pacific	oxic	0.439993	0.1347	0.12	729	720.245
Eq Pacific	oxic	0.441897	0.1671	0.14	774	763.139
Eq Pacific	oxic	0.444941	0.1404	0.12	820	810.874
Eq Pacific	oxic	0.446146	0.1096	0.13	632	624.876
Eq Pacific	oxic	0.447898	0.1266	0.13	640	631.771
Eq Pacific	oxic	0.449859	0.1379	0.15	721	712.037
Eq Pacific	oxic	0.451099	0.1527	0.14	812	802.074
Eq Pacific	oxic	0.45296	0.1749	0.13	903	891.631
Eq Pacific	oxic	0.454883	0.2279	0.18	1024	1009.19
Eq Pacific	oxic	0.456838	0.1747	0.22	874	862.644
Eq Pacific	oxic	0.458244	0.1771	0.12	827	815.489
Eq Pacific	oxic	0.460854	0.2673	0.12	1108	1090.63
Eq Pacific	oxic	0.462851	0.2745	0.13	1201	1183.16
Eq Pacific	oxic	0.464958	0.3107	0.17	1172	1151.8
Eq Pacific	oxic	0.467022	0.365	0.22	1451	1427.28
Eq Pacific	oxic	0.469068	0.4707	0.18	1731	1700.4
Eq Pacific	oxic	0.471182	0.7492	0.25	2886	2837.3
Eq Pacific	oxic	0.473851	0.9495	0.23	3659	3597.28
Eq Pacific	oxic	0.475901	1.1873	0.27	4540	4462.83
Eq Pacific	oxic	0.478053	0.9136	0.26	3196	3136.62
Eq Pacific	oxic	0.480895	0.8048	0.18	2873	2820.69
Eq Pacific	oxic	0.486852	0.3879	0.22	1476	1450.79
Eq Pacific	oxic	0.488173	0.3323	0.17	1302	1280.4
Eq Pacific	oxic	0.490046	0.26	0.24	1139	1122.1
Eq Pacific	oxic	0.49412	0.2428	0.12	981	965.218
Eq Pacific	oxic	0.499104	0.2615	0.08	1143	1126
Eq Pacific	oxic	0.504193	0.2725	0.2	1114	1096.29
Eq Pacific	oxic	0.509154	0.2605	0.17	1068	1051.07
Eq Pacific	oxic	0.513064	0.2415	0.15	1135	1119.3
Eq Pacific	oxic	0.516042	0.2159	0.12	990	975.966
Eq Pacific	oxic	0.518788	0.1892	0.12	889	876.702
Eq Pacific	oxic	0.520921	0.1692	0.15	812	801.002
Eq Pacific	oxic	0.522907	0.1407	0.14	694	684.855
Eq Pacific	oxic	0.524952	0.1326	0.12	641	632.381
Eq Pacific	oxic	0.526951	0.1423	0.12	729	719.75
Eq Pacific	oxic	0.529054	0.1471	0.12	733	723.438
Eq Pacific	oxic	0.531934	0.1837	0.13	984	972.059
Eq Pacific	oxic	0.535084	0.1993	0.11	1030	1017.05
Eq Pacific	oxic	0.540913	0.1644	0.15	788	777.314
Eq Pacific	oxic	0.550839	0.1614	0.16	820	809.509
Eq Pacific	oxic	0.558999	0.2245	0.23	1081	1066.41
Eq Pacific	oxic	0.56792	0.2838	0.15	1385	1366.55
Eq Pacific	oxic	0.569761	0.324	0.14	1449	1427.94
Eq Pacific	oxic	0.571094	0.3152	0.24	1488	1467.51
Eq Pacific	oxic	0.573198	0.3451	0.17	1411	1388.57
Eq Pacific	oxic	0.575157	0.3849	0.07	1640	1614.98
Eq Pacific	oxic	0.577202	0.4015	0.19	1766	1739.9
Eq Pacific	oxic	0.579089	0.3289	0.15	1498	1476.62
Eq Pacific	oxic	0.581057	0.2652	0.14	1302	1284.76
Eq Pacific	oxic	0.582998	0.1946	0.15	1018	1005.35
Eq Pacific	oxic	0.584977	0.2179	0.16	1062	1047.84
Eq Pacific	oxic	0.587013	0.1826	0.14	1027	1015.13
Eq Pacific	oxic	0.589093	0.2314	0.06	1234	1218.96
Eq Pacific	oxic	0.591891	0.2433	0.15	1357	1341.19
Eq Pacific	oxic	0.594093	0.2586	0.1	1521	1504.19
Eq Pacific	oxic	0.596923	0.2522	0.09	1387	1370.61
Eq Pacific	oxic	0.599131	0.2572	0.14	1337	1320.28
Eq Pacific	oxic	0.602024	0.238	0.07	1302	1286.53
Eq Pacific	oxic	0.604936	0.2853	0.15	1453	1434.46
Eq Pacific	oxic	0.608	0.2818	0.13	1445	1426.68
Eq Pacific	oxic	0.611085	0.2105	0.12	1202	1188.32
Eq Pacific	oxic	0.615	0.1916	0.11	1061	1048.55
Eq Pacific	oxic	0.619848	0.1531	0.09	729	719.048
Eq Pacific	oxic	0.624988	0.1677	0.14	917	906.1
Eq Pacific	oxic	0.630875	0.1349	0.1	810	801.231
Eq Pacific	oxic	0.636019	0.1385	0.14	897	887.997
Eq Pacific	oxic	0.640923	0.1358	0.09	806	797.173
Eq Pacific	oxic	0.645	0.1476	0.1	797	787.406
Eq Pacific	oxic	0.648858	0.1356	0.1	614	605.186
Eq Pacific	oxic	0.655069	0.1144	0.05	569	561.564
Eq Pacific	oxic	0.657976	0.1089	0.06	543	535.922
Eq Pacific	oxic	0.660232	0.0983	0.11	462	455.611
Eq Pacific	oxic	0.66293	0.1135	0.25	559	551.622
Eq Pacific	oxic	0.664839	0.1037	0.15	575	568.26
Eq Pacific	oxic	0.666855	0.11	0.15	658	650.85
Eq Pacific	oxic	0.668759	0.134	0.19	738	729.29
Eq Pacific	oxic	0.670137	0.1389	0.21	761	751.971
Eq Pacific	oxic	0.672143	0.195	0.08	1025	1012.33
Eq Pacific	oxic	0.676066	0.227	0.17	1128	1113.24
Eq Pacific	oxic	0.678031	0.2328	0.17	1205	1189.87
Eq Pacific	oxic	0.6801	0.2314	0.12	1162	1146.96
Eq Pacific	oxic	0.682148	0.4337	0.08	1944	1915.81
Eq Pacific	oxic	0.684955	0.3852	0.07	1843	1817.96
Eq Pacific	oxic	0.687839	0.3017	0.07	1432	1412.39
Eq Pacific	oxic	0.690798	0.1881	0.09	854	841.774
Eq Pacific	oxic	0.693892	0.1526	0.11	786	776.081
Eq Pacific	oxic	0.697196	0.1396	0.22	636	626.926
Eq Pacific	oxic	0.701036	0.1228	0.26	607	599.018
Eq Pacific	oxic	0.705099	0.1035	0.09	615	608.273
Eq Pacific	oxic	0.709096	0.1078	0.1	587	579.993
Eq Pacific	oxic	0.713068	0.1293	0.07	650	641.596
Eq Pacific	oxic	0.716941	0.1644	0.16	655	644.314
Eq Pacific	oxic	0.720077	0.2132	0.13	1013	999.142
Eq Pacific	oxic	0.723101	0.1857	0.21	867	854.929
Eq Pacific	oxic	0.726136	0.1691	0.17	760	749.009
Eq Pacific	oxic	0.72988	0.1275	0.19	659	650.712
Eq Pacific	oxic	0.733109	0.0701	0.06	419	414.443
Eq Pacific	oxic	0.737993	0.1154	0.24	630	622.499
Eq Pacific	oxic	0.742872	0.0932	0.13	552	545.942
Eq Pacific	oxic	0.749025	0.087	0.14	479	473.345
Eq Pacific	oxic	0.755144	0.0975	0.21	579	572.663
Eq Pacific	oxic	0.760144	0.0958	0.07	467	460.773
Eq Pacific	oxic	0.763929	0.1541	0.16	606	595.984
Eq Pacific	oxic	0.767095	0.2209	0.17	835	820.641
Eq Pacific	oxic	0.770903	0.2276	0.09	957	942.206
Eq Pacific	oxic	0.77305	0.2694	0.16	1052	1034.49
Eq Pacific	oxic	0.775161	0.369	0.15	1567	1543.02
Eq Pacific	oxic	0.777106	0.4552	0.18	1893	1863.41
Eq Pacific	oxic	0.779065	0.5575	0.11	2294	2257.76
Eq Pacific	oxic	0.781001	0.393	0.21	1668	1642.45
Eq Pacific	oxic	0.782888	0.1924	0.06	858	845.494
Eq Pacific	oxic	0.784065	0.1435	0.16	754	744.673
Eq Pacific	oxic	0.786179	0.1127	0.17	502	494.675
Eq Pacific	oxic	0.788075	0.1278	0.09	560	551.693
Eq Pacific	oxic	0.790098	0.1495	0.11	711	701.283
Eq Pacific	oxic	0.792108	0.2014	0.15	877	863.909
Eq Pacific	oxic	0.794898	0.218	0.1	935	920.83
Eq Pacific	oxic	0.797152	0.2338	0.06	962	946.803
Eq Pacific	oxic	0.800934	0.2216	0.14	888	873.596
Eq Pacific	oxic	0.805159	0.2479	0.09	1001	984.886
Eq Pacific	oxic	0.812022	0.2807	0.11	1306	1287.75
Eq Pacific	oxic	0.818844	0.2501	0.07	1140	1123.74
Eq Pacific	oxic	0.826015	0.3109	0.11	1328	1307.79
Eq Pacific	oxic	0.832064	0.3567	0.12	1534	1510.81
Eq Pacific	oxic	0.83716	0.5822	0.21	2552	2514.16
Eq Pacific	oxic	0.84215	0.3994	0.23	1799	1773.04
Eq Pacific	oxic	0.847833	0.4916	0.23	2036	2004.05
Eq Pacific	oxic	0.853952	0.3001	0.12	1359	1339.49
Eq Pacific	oxic	0.861022	0.2537	0.06	1096	1079.51
Eq Pacific	oxic	0.867077	0.2214	0.17	950	935.609
Eq Pacific	oxic	0.872149	0.2276	0.07	1160	1145.21
Eq Pacific	oxic	0.877165	0.2302	0.12	1247	1232.04
Eq Pacific	oxic	0.882989	0.2144	0.18	1001	987.064
Eq Pacific	oxic	0.889122	0.2316	0.13	1081	1065.95
Eq Pacific	oxic	0.896969	0.2889	0.19	1185	1166.22
Eq Pacific	oxic	0.905046	0.2888	0.21	1283	1264.23
Eq Pacific	oxic	0.912927	0.1528	0.16	769	759.068
Eq Pacific	oxic	0.918868	0.1553	0.14	790	779.905
Eq Pacific	oxic	0.922969	0.1223	0.15	673	665.051
Eq Pacific	oxic	0.926012	0.1546	0.06	758	747.951
Eq Pacific	oxic	0.929067	0.2385	0.19	969	953.497
Eq Pacific	oxic	0.932077	0.2318	0.19	999	983.933
Eq Pacific	oxic	0.935109	0.4456	0.17	1447	1418.04
Eq Pacific	oxic	0.937994	0.6261	0.19	2726	2685.3
Eq Pacific	oxic	0.940878	0.428	0.17	2018	1990.18
Eq Pacific	oxic	0.943844	0.4291	0.21	2110	2082.11
Eq Pacific	oxic	0.946924	0.2981	0.26	1528	1508.62
Eq Pacific	oxic	0.951014	0.2174	0.06	1289	1274.87
Eq Pacific	oxic	0.955104	0.2333	0.25	1133	1117.84
Eq Pacific	oxic	0.961141	0.2872	0.22	1109	1090.33
Eq Pacific	oxic	0.967243	0.4028	0.08	1750	1723.82
Eq Pacific	oxic	0.977997	0.4272	0.07	2019	1991.23
Eq Pacific	oxic	0.987024	0.2245	0.12	1232	1217.41
Eq Pacific	oxic	0.995965	0.1402	0.07	735	725.887
Eq Pacific	oxic	1.00488	0.2763	0.12	1210	1192.04
Eq Pacific	oxic	1.01385	0.2537	0.09	1201	1184.51
Eq Pacific	oxic	1.02184	0.1792	0.08	753	741.352
Eq Pacific	oxic	1.02814	0.1735	0.11	753	741.722
Eq Pacific	oxic	1.03495	0.1538	0.07	639	629.003
Eq Pacific	oxic	1.04003	0.2403	0.18	873	857.38
Eq Pacific	oxic	1.04513	0.3533	0.15	1094	1071.04
S Atlantic	suboxic	2.1043	2.04882	0.42	558	424.826
S Atlantic	suboxic	2.1489	1.72059	0.73	520	408.162
S Atlantic	suboxic	2.1936	2.23412	1.03	746	600.782
S Atlantic	suboxic	2.2322	2.63647	1.08	765	593.629
S Atlantic	suboxic	2.2529	1.86353	0.6	535	413.871
S Atlantic	suboxic	2.2636	1.99059	0.71	480	350.612
S Atlantic	suboxic	2.2747	1.60412	0.38	707	602.732
S Atlantic	suboxic	2.3192	2.41941	0.58	1259	1101.74
S Atlantic	suboxic	2.3637	2.03824	0.73	527	394.515
S Atlantic	suboxic	2.417	2.97529	0.59	785	591.606
S Atlantic	suboxic	2.4656	1.89529	0.9	717	593.806
S Atlantic	suboxic	2.5299	1.73647	0.56	570	457.129
S Atlantic	suboxic	2.61	1.87412	0.47	683	561.182
S Atlantic	suboxic	2.7652	1.44	0.58	346	252.4
S Atlantic	suboxic	2.8234	1.15941	0.37	701	625.638
S Atlantic	suboxic	2.8768	2.22882	0.67	858	713.126
S Atlantic	suboxic	2.9544	2.81647	0.7	556	372.929
S Atlantic	suboxic	2.9663	1.69412	0.55	615	504.882
S Atlantic	suboxic	3.0073	2.73706	1.2	635	457.091
S Atlantic	suboxic	3.0043	2.29235	1.04	615	465.997
S Atlantic	suboxic	3.0182	3.12353	1.08	654	450.971
S Atlantic	suboxic	3.0356	2.52	0.94	710	546.2
S Atlantic	suboxic	3.0469	3.51	1.04	670	441.85
S Atlantic	suboxic	3.0713	2.80059	0.9	653	470.962
S Atlantic	suboxic	3.1665	2.65765	1.26	560	387.253
S Atlantic	suboxic	3.1813	2.40882	0.94	529	372.426
S Atlantic	suboxic	3.1959	1.96412	0.47	557	429.332
S Atlantic	suboxic	3.2128	1.94294	0.89	116	0
S Atlantic	suboxic	3.3487	2.37176	1.27	595	440.835
S Atlantic	suboxic	3.4764	2.37706	0.98	633	478.491
S Atlantic	suboxic	3.6232	2.84294	0.49	573	388.209
S Atlantic	suboxic	3.6334	2.90647	0.58	560	371.079
S Atlantic	suboxic	3.7624	2.57824	0.65	602	434.415
S Ocean	oxic	0	2.4			2347
S Ocean	oxic	0.012217	2.41			627
S Ocean	oxic	0.013383	1.92			414
S Ocean	oxic	0.014299	2.42			380
S Ocean	oxic	0.01525	1.92			363
S Ocean	oxic	0.016213	2.42			330
S Ocean	oxic	0.017288	2.4			427
S Ocean	oxic	0.018419	2.41			528
S Ocean	oxic	0.019558	2.4			426
S Ocean	oxic	0.020719	2.42			453
S Ocean	oxic	0.021763	2.19			449
S Ocean	oxic	0.022875	2.44			482
S Ocean	oxic	0.023345	1.96			420
S Ocean	oxic	0.024493	1.94			366
S Ocean	oxic	0.026642	1.94			366
S Ocean	oxic	0.02907	1.45			350
S Ocean	oxic	0.031546	1.44			348
S Ocean	oxic	0.032056	1.43			543
S Ocean	oxic	0.032309	1.4			629
S Ocean	oxic	0.032922	1.95			318
S Ocean	oxic	0.035208	1.94			417
S Ocean	oxic	0.038169	1.95			416
S Ocean	oxic	0.042597	2.44			533
S Ocean	oxic	0.047385	2.45			434
S Ocean	oxic	0.051752	2.44			433
S Ocean	oxic	0.057392	3.69			400
S Ocean	oxic	0.061683	4.93			118
S Ocean	oxic	0.064619	2.94			352
S Ocean	oxic	0.06756	2.45			335
S Ocean	oxic	0.070676	2.44			335
S Ocean	oxic	0.075249	3.44			268
S Ocean	oxic	0.080162	3.45			418
S Ocean	oxic	0.084342	2.94			500
S Ocean	oxic	0.088374	1.91			509
S Ocean	oxic	0.092164	1.43			547
S Ocean	oxic	0.09588	1.93			465
S Ocean	oxic	0.099686	1.93			464
S Ocean	oxic	0.101635	1.88			839
S Ocean	oxic	0.103754	2.44			484
S Ocean	oxic	0.107352	1.93			514
S Ocean	oxic	0.110121	1.37			664
S Ocean	oxic	0.116678	1.32			481
S Ocean	oxic	0.121749	1.33			772
S Ocean	oxic	0.126532	2.37			883
S Ocean	oxic	0.133337	2.38			538
S Ocean	oxic	0.136148	2.88			654
S Ocean	oxic	0.139755	2.88			753
S Ocean	oxic	0.143936	2.88			703
S Ocean	oxic	0	8.9			1115
S Ocean	oxic	0.004692	0.86			1652
S Ocean	oxic	0.006384	0.85			1584
S Ocean	oxic	0.007799	0.43			1334
S Ocean	oxic	0.008936	0.87			1111
S Ocean	oxic	0.00981	0.39			1020
S Ocean	oxic	0.010419	0.41			997
S Ocean	oxic	0.011028	0.43			650
S Ocean	oxic	0.011432	0.38			761
S Ocean	oxic	0.011836	0.44			519
S Ocean	oxic	0.012252	0.42			771
S Ocean	oxic	0.012688	0.44			820
S Ocean	oxic	0.013189	0.39			772
S Ocean	oxic	0.013644	0.44			520
S Ocean	oxic	0.014068	0.43			604
S Ocean	oxic	0.014491	1.44			1097
S Ocean	oxic	0.015205	2.37			1280
S Ocean	oxic	0.016208	2.91			892
S Ocean	oxic	0.017211	4.36			701
S Ocean	oxic	0.018311	3.89			627
S Ocean	oxic	0.020384	2.97			636
S Ocean	oxic	0.022501	4.94			366
S Ocean	oxic	0.024609	3.95			684
S Ocean	oxic	0.028081	3.44			568
S Ocean	oxic	0.03181	3.92			485
S Ocean	oxic	0.035201	2.93			649
S Ocean	oxic	0.038844	2.44			585
S Ocean	oxic	0.041853	2.94			601
S Ocean	oxic	0.044993	2.94			600
S Ocean	oxic	0.048123	3.93			683
S Ocean	oxic	0.051127	2.93			550
S Ocean	oxic	0.054025	3.45			518
S Ocean	oxic	0.056448	4.41			448
S Ocean	oxic	0.059177	2.44			831
S Ocean	oxic	0.061819	3.45			817
S Ocean	oxic	0.06433	3.44			716
S Ocean	oxic	0.067131	3.46			619
S Ocean	oxic	0.069619	2.45			734
S Ocean	oxic	0.07212	3.32			738
S Ocean	oxic	0.07338	5.21			328
S Ocean	oxic	0.074872	2.84			770
S Ocean	oxic	0.077871	1.74			880
S Ocean	oxic	0.080596	1.27			966
S Ocean	oxic	0.083085	1.77			1077
S Ocean	oxic	0.085626	4.44			649
S Ocean	oxic	0.088183	2.9			649
S Ocean	oxic	0.090748	2.37			564
S Ocean	oxic	0.093474	1.79			674
S Ocean	oxic	0.095975	0.87			782
S Ocean	oxic	0.098156	2.3			749
S Ocean	oxic	0.100464	1.38			924
S Ocean	oxic	0.102745	2.85			882
S Ocean	oxic	0.104841	2.4			878
S Ocean	oxic	0.107871	2.85			784
S Ocean	oxic	0.111055	0.92			1562
S Ocean	oxic	0.113896	0.41			1747
S Ocean	oxic	0.11646	0.42			1550
S Ocean	oxic	0.11848	0.41			1396
S Ocean	oxic	0.120542	0.43			1060
S Ocean	oxic	0.122447	0.42			867
S Ocean	oxic	0.123629	0.41			1204
S Ocean	oxic	0.125965	0.37			1149
S Ocean	oxic	0.12748	0.43			662
S Ocean	oxic	0.128611	0.42			568
S Ocean	oxic	0.129961	2.43			932
S Ocean	oxic	0.132664	3.41			569
S Ocean	oxic	0.134547	3.92			531
S Ocean	oxic	0.13643	4.91			619
S Ocean	oxic	0.138314	3.43			815
S Ocean	oxic	0.142561	3.43			665
S Ocean	oxic	0	5.69			633
S Ocean	oxic	0.005298	3.05			996
S Ocean	oxic	0.016741	6.18			436
S Ocean	oxic	0.022364	5.96			403
S Ocean	oxic	0.037766	5.78			411
S Ocean	oxic	0.06523	5.94			550
S Ocean	oxic	0.082789	6.08			490
S Ocean	oxic	0.102798	6.04			444
S Ocean	oxic	0.117008	5.19			551
S Ocean	oxic	0.119549	0.15			539
S Ocean	oxic	0.120539	0.2			537
S Ocean	oxic	0.121344	0.15			489
S Ocean	oxic	0.122278	0.1			343
S Ocean	oxic	0.12322	0.1			344
S Ocean	oxic	0.124016	0.15			388
S Ocean	oxic	0.12485	0.15			338
S Ocean	oxic	0.125733	0.15			341
S Ocean	oxic	0.126511	0.19			230
S Ocean	oxic	0.128315	0.95			585
S Ocean	oxic	0.131818	3.05			945
S Ocean	oxic	0.143336	5.85			558
S Ocean	oxic	0.156763	5.83			559
S Ocean	oxic	0.168039	5.9			555
S Ocean	oxic	0.179484	5.79			660
S Ocean	oxic	0.195974	5.71			719
S Ocean	oxic	0.213644	5.5			1032
S Ocean	oxic	0.22894	5.36			692
S Ocean	oxic	0.241566	5.11			810
S Ocean	oxic	0.259113	6.24			731
S Ocean	oxic	0.277344	5.24			748
S Ocean	oxic	0.296984	5.06			924
S Ocean	oxic	0.306557	3.49			564
S Ocean	oxic	0.309937	0.15			490
S Ocean	oxic	0.000727	2.83			650
S Ocean	oxic	0.002182	2.27			1288
S Ocean	oxic	0.007668	1.54			557
S Ocean	oxic	0.013354	3.53			1013
S Ocean	oxic	0.01444	3.69			723
S Ocean	oxic	0.014747	3.81			715
S Ocean	oxic	0.015221	4.54			616
S Ocean	oxic	0.016092	4.21			278
S Ocean	oxic	0.016939	4.21			598
S Ocean	oxic	0.017814	4.43			683
S Ocean	oxic	0.018722	4.46			991
S Ocean	oxic	0.019599	4.42			824
S Ocean	oxic	0.020424	4.42			924
S Ocean	oxic	0.021437	4.92			780
S Ocean	oxic	0.022509	4.43			523
S Ocean	oxic	0.023679	4.59			462
S Ocean	oxic	0.027738	3.85			492
S Ocean	oxic	0.036155	3.41			442
S Ocean	oxic	0.044012	4.19			229
S Ocean	oxic	0.048707	3.92			337
S Ocean	oxic	0.052885	3.46			218
S Ocean	oxic	0.05719	3.34			256
S Ocean	oxic	0.060915	4.97			957
S Ocean	oxic	0.064563	4.95			1218
S Ocean	oxic	0.066504	4.74			1072
S Ocean	oxic	0.068459	4.81			558
S Ocean	oxic	0.070974	4.49			919
S Ocean	oxic	0.074009	4.19			1249
S Ocean	oxic	0.082743	2.38			191
S Ocean	oxic	0.091111	3.9			759
S Ocean	oxic	0.100696	3.64			1036
S Ocean	oxic	0.109773	4.44			1643
S Ocean	oxic	0.118816	4.28			1553
S Ocean	oxic	0.127923	1.65			379
S Ocean	oxic	0.131706	2.06			162
S Ocean	oxic	0.133138	1.94			230
S Ocean	oxic	0.134474	2.9			0
S Ocean	oxic	0.137698	3.5			396
S Ocean	oxic	0.14039	4.57			984
S Ocean	oxic	0.143236	4.77			1110
S Ocean	oxic	0.146229	4.14			1023
S Ocean	oxic	0.148904	5.26			1088
S Ocean	oxic	0.151694	4.85			1275
S Ocean	oxic	0.154588	4.67			1567
S Ocean	oxic	0.157935	4.83			1326
S Ocean	oxic	0.161002	4.88			1233
S Ocean	oxic	0.165311	4.14			1403
S Ocean	oxic	0.169592	4.76			1451
S Ocean	oxic	0.173412	4.73			1333
S Ocean	oxic	0.177542	4.88			1423
S Ocean	oxic	0.182605	4.94			2019
S Ocean	oxic	0.189282	4.95			2238
S Ocean	oxic	0.193449	5.59			2715
S Ocean	oxic	0.198903	4.87			2294
S Ocean	oxic	0.210349	3.63			1167
S Ocean	oxic	0.218314	4.42			1594
S Ocean	oxic	0.219862	4.37			1377
S Ocean	oxic	0.22359	4.45			1452
S Ocean	oxic	0.226004	5.35			2172
S Ocean	oxic	0.228766	4.95			1608
S Ocean	oxic	0.232045	4.45			2392
S Ocean	oxic	0.23407	3.25			992
S Ocean	oxic	0.236112	1.96			299
S Ocean	oxic	0.238169	1.88			74
S Ocean	oxic	0.240227	2.88			457
S Ocean	oxic	0.241309	3.3			929
S Ocean	oxic	0.242392	3.38			934
S Ocean	oxic	0.243937	4.19			1209
S Ocean	oxic	0.245945	3.86			1161
S Ocean	oxic	0.248238	3.27			641
S Ocean	oxic	0.250495	4.17			1481
C Indian	oxic	0	7.21		2280	1811.35
C Indian	oxic	0	4.62		3560	3259.7
C Indian	oxic	0	3.85		3200	2949.75
C Indian	oxic	0	1.92		1830	1705.2
C Indian	oxic	0	2.98		1920	1726.3
C Indian	oxic	0	2.61		533	363.35
C Indian	oxic	0	3.39		400	179.65
C Indian	oxic	0	4.7		300	0
C Indian	oxic	0	3.94		372	115.9
C Indian	oxic	0	4.29		325	46.15
C Indian	oxic	0	2.58		103	0
C Indian	oxic	0	3.1		303	101.5
C Indian	oxic	0	1.82		150	31.7
C Indian	oxic	0	2		170	40
C Indian	oxic	0	1.4		180	89
C Indian	oxic	0	1.26		140	58.1
C Indian	oxic	0	1.74		333	219.9
C Indian	oxic	0	1.36		237	148.6
C Indian	oxic	0	1.24		190	109.4
C Indian	oxic	0	1.66		270	162.1
C Indian	oxic	0	1.53		317	217.55
C Indian	oxic	0	3.79		460	213.65
Arabian Sea	oxic	0.006	1.409	1.067	754	687.072
Arabian Sea	oxic	0.0075	1.111	0.867625	799	746.227
Arabian Sea	suboxic	0.0061	2.12
Arabian Sea	oxic	0.009	1.111	0.75713	693	640.227
Arabian Sea	oxic	0.0102	1.973	0.775391	325	231.282
Arabian Sea	suboxic	0.0075	1.97
Arabian Sea	oxic	0.0115	1.578	0.770333	309	234.045
Arabian Sea	oxic	0.0128	2.115	0.74975	286	185.537
Arabian Sea	suboxic	0.0088	2.23
Arabian Sea	oxic	0.014	2.219	0.810348	295	189.598
Arabian Sea	oxic	0.015	2.34	0.882957	306	194.85
Arabian Sea	suboxic	0.0101	2.22
Arabian Sea	oxic	0.0161	2.687	0.964208	224	96.3675
Arabian Sea	oxic	0.0172	2.389	1.04625	304	190.523
Arabian Sea	suboxic	0.0115	2.29
Arabian Sea	oxic	0.0192	2.344	1.01963	283	171.66
Arabian Sea	oxic	0.0212	2.312	0.917683	254	144.18
Arabian Sea	suboxic	0.0128	2.64
Arabian Sea	oxic	0.0223	2.447	0.904244	237	120.767
Arabian Sea	oxic	0.0255	2.327	1.0822	319	208.468
Arabian Sea	suboxic	0.0141	2.73
Arabian Sea	oxic	0.0277	2.335	1.02749	311	200.088
Arabian Sea	oxic	0.0298	2.603	0.925561	283	159.357
Arabian Sea	suboxic	0.0155	2.75
Arabian Sea	oxic	0.0319	2.371	0.961927	305	192.377
Arabian Sea	oxic	0.034	2.273	1.02134	286	178.032
Arabian Sea	suboxic	0.0168	2.86
Arabian Sea	oxic	0.036	2.365	1.06783	321	208.662
Arabian Sea	oxic	0.0381	2.606	1.11546	197	73.215
Arabian Sea	suboxic	0.0181	2.99
Arabian Sea	oxic	0.0401	1.983	1.11605	272	177.808
Arabian Sea	oxic	0.0421	1.883	1.11166	343	253.558
Arabian Sea	suboxic	0.0195	2.9
Arabian Sea	oxic	0.0441	2.036	1.08737	447	350.29
Arabian Sea	oxic	0.0462	2.014	1.05817	450	354.335
Arabian Sea	suboxic	0.0208	2.98
Arabian Sea	oxic	0.0482	2.251	1.0822	359	252.077
Arabian Sea	oxic	0.0503	1.828	1.11702	470	383.17
Arabian Sea	oxic	0.0523	1.756	1.02124	467	383.59
Arabian Sea	oxic	0.0543	1.911	0.902707	315	224.227
Arabian Sea	oxic	0.0563	1.892	0.844268	307	217.13
Arabian Sea	suboxic	0.0238	2.64
Arabian Sea	oxic	0.0584	1.73	0.798683	410	327.825
Arabian Sea	suboxic	0.0253	2.87
Arabian Sea	oxic	0.0604	2.401	0.727143	298	183.953
Arabian Sea	oxic	0.0625	5.134	0.644643	244	0.135
Arabian Sea	suboxic	0.0276	2.82
Arabian Sea	oxic	0.0651	2.834	0.67582	251	116.385
Arabian Sea	oxic	0.0677	2.607	0.73874	291	167.167
Arabian Sea	suboxic	0.0298	3.2
Arabian Sea	oxic	0.0701	2.736	0.7376	373	243.04
Arabian Sea	oxic	0.0732	2.678	0.7252	296	168.795
Arabian Sea	suboxic	0.0321	2.99
Arabian Sea	oxic	0.0762	2.009	0.6648	372	276.572
Arabian Sea	oxic	0.0792	1.67	0.5868	441	361.675
Arabian Sea	suboxic	0.0343	2.88
Arabian Sea	oxic	0.0841	2.308	0.550895	283	173.37
Arabian Sea	oxic	0.089	2.065	0.532842	372	273.913
Arabian Sea	suboxic	0.0366	4.22
Arabian Sea	oxic	0.0935	1.913	0.610158
Arabian Sea	oxic	0.098	1.6	0.699211	501	425
Arabian Sea	suboxic	0.0388	3.08
Arabian Sea	oxic	0.1032	2.019	0.736804	575	479.097
Arabian Sea	oxic	0.1075	1.89	0.755033	492	402.225
Arabian Sea	suboxic	0.0411	3.17
Arabian Sea	oxic	0.1131	1.466	0.705804	419	349.365
Arabian Sea	oxic	0.1168	2.347	0.666391	560	448.517
Arabian Sea	suboxic	0.0433	3.06
Arabian Sea	oxic	0.1198	1.927	0.658065	703	611.467
Arabian Sea	oxic	0.1228	1.552	0.655645	1046	972.28
Arabian Sea	suboxic	0.0455	2.93
Arabian Sea	oxic	0.1241	1.411	0.613226	703	635.977
Arabian Sea	oxic	0.126	2.466	0.454484	181	63.865
Arabian Sea	suboxic	0.0478	2.76
Arabian Sea	oxic	0.1275	2.456	0.46	225	108.34
Arabian Sea	oxic	0.1292	2.382	0.596	211	97.855
Arabian Sea	suboxic	0.05	2.91
Arabian Sea	oxic	0.132	2.452	0.853423	249	132.53
Arabian Sea	suboxic	0.0523	3.11
Arabian Sea	oxic	0.1358	2.123	1.08887	347	246.157
Arabian Sea	suboxic	0.0545	2.92
Arabian Sea	oxic	0.1371	2.145	1.0074	336	234.113
Arabian Sea	oxic	0.1382	2.265	0.934471	282	174.412
Arabian Sea	suboxic	0.0568	2.97
Arabian Sea	oxic	0.1405	2.442	0.744382	275	159.005
Arabian Sea	oxic	0.1426	2.386	0.655257	308	194.665
Arabian Sea	suboxic	0.059	2.89
Arabian Sea	oxic	0.1441	2.402	0.636829	233	118.905
Arabian Sea	oxic	0.1452	2.339	0.637286	252	140.898
Arabian Sea	suboxic	0.0611	2.84
Arabian Sea	oxic	0.1476	3.059	0.719571	203	57.6975
Arabian Sea	oxic	0.1494	3.202	0.764429	232	79.905
Arabian Sea	suboxic	0.0632	2.8
Arabian Sea	oxic	0.1512	2.85	0.7958	283	147.625
Arabian Sea	oxic	0.1527	2.935	0.829647	317	177.588
Arabian Sea	suboxic	0.0653	2.76
Arabian Sea	oxic	0.1542	3.029	0.870235	319	175.123
Arabian Sea	oxic	0.1562	3.21	0.882514	263	110.525
Arabian Sea	suboxic	0.0674	2.95
Arabian Sea	oxic	0.158	3.052	0.847543	350	205.03
Arabian Sea	oxic	0.1595	3.284	0.825	265	109.01
Arabian Sea	suboxic	0.0695	2.85
Arabian Sea	oxic	0.1614	2.834	0.806	382	247.385
Arabian Sea	oxic	0.1632	2.578	0.803171	401	278.545
Arabian Sea	suboxic	0.0716	3.24
Arabian Sea	oxic	0.165	2.625	0.815514	368	243.312
Arabian Sea	oxic	0.1668	2.487	0.725286	399	280.868
Arabian Sea	suboxic	0.0737	2.8
Arabian Sea	oxic	0.1687	2.704	0.543429	302	173.56
Arabian Sea	oxic	0.1707	2.658	0.535512	354	227.745
Arabian Sea	suboxic	0.0758	2.45
Arabian Sea	oxic	0.1728	2.656	0.60978	339	212.84
Arabian Sea	oxic	0.1752	2.178	0.67675	259	155.545
Arabian Sea	suboxic	0.0779	1.94
Arabian Sea	oxic	0.1776	2.604	0.73775	359	235.31
Arabian Sea	oxic	0.18	2.666	0.751875	424	297.365
Arabian Sea	suboxic	0.08	2.35
Arabian Sea	oxic	0.182	2.567	0.750625	518	396.067
Arabian Sea	oxic	0.1841	2.481	0.7215	582	464.153
Arabian Sea	suboxic	0.086	2.45
Arabian Sea	oxic	0.1862	1.839	0.667091	645	557.648
Arabian Sea	oxic	0.1877	1.735	0.628227	540	457.587
Arabian Sea	suboxic	0.092	2.19
Arabian Sea	oxic	0.1897	1.502	0.576409	521	449.655
Arabian Sea	oxic	0.1911	1.599	0.540136	550	474.048
Arabian Sea	suboxic	0.098	2.06
Arabian Sea	oxic	0.1932	1.507	0.536315	548	476.418
Arabian Sea	oxic	0.1976	1.549	0.581303	687	613.423
Arabian Sea	suboxic	0.104	2.22
Arabian Sea	oxic	0.2008	1.176	0.612213	737	681.14
Arabian Sea	oxic	0.2043	1.159	0.584685	714	658.947
Arabian Sea	suboxic	0.11	2.21
Arabian Sea	oxic	0.208	1.868	0.555584	446	357.27
Arabian Sea	oxic	0.2115	2.34	0.57042	281	169.85
Arabian Sea	suboxic	0.116	2.12
Arabian Sea	oxic	0.215	2.809	0.620932	265	131.572
Arabian Sea	oxic	0.2185	2.714	0.663487	323	194.085
Arabian Sea	suboxic	0.122	2.35
Arabian Sea	oxic	0.2221	2.175	0.429026	516	412.688
Arabian Sea	oxic	0.2258	2.152	0.621513	380	277.78
Arabian Sea	suboxic	0.1232	2.33
Arabian Sea	oxic	0.2298	2.362	0.9123	421	308.805
Arabian Sea	oxic	0.2334	2.006	0.792667	524	428.715
Arabian Sea	suboxic	0.1244	2.55
Arabian Sea	oxic	0.237	1.623	0.756282	573	495.908
Arabian Sea	oxic	0.239	1.315	0.659324	602	539.538
Arabian Sea	suboxic	0.1255	2.69
Arabian Sea	oxic	0.241	2.145	0.467973	326	224.113
Arabian Sea	oxic	0.2429	1.865	0.539333	242	153.412
Arabian Sea	suboxic	0.1267	2.47
Arabian Sea	oxic	0.2448	2.055	0.758361	417	319.387
Arabian Sea	oxic	0.2463	2.415	0.906	263	148.287
Arabian Sea	suboxic	0.1279	2.67
Arabian Sea	oxic	0.2481	2.081	1.068	379	280.153
Arabian Sea	oxic	0.2498	2.069	1.10464	376	277.722
Arabian Sea	suboxic	0.1291	2.76
Arabian Sea	oxic	0.2517	1.983	0.999273	398	303.808
Arabian Sea	oxic	0.2532	1.617	0.933971	450	373.192
Arabian Sea	suboxic	0.1303	2.87
Arabian Sea	oxic	0.255	1.62	0.869912	454	377.05
Arabian Sea	oxic	0.2566	1.994	0.817182	369	274.285
Arabian Sea	suboxic	0.1315	2.96
Arabian Sea	oxic	0.2582	2.096	0.767727	402	302.44
Arabian Sea	oxic	0.2598	2.094	0.680455	375	275.535
Arabian Sea	suboxic	0.1326	2.93
Arabian Sea	oxic	0.2616	2.711	0.539727	262	133.228
Arabian Sea	oxic	0.2632	2.762	0.481029	209	77.805
Arabian Sea	suboxic	0.1338	3.06
Arabian Sea	oxic	0.265	3.004	0.473088	259	116.31
Arabian Sea	oxic	0.2665	2.723	0.483091	356	226.657
Arabian Sea	suboxic	0.135	3.03
Arabian Sea	oxic	0.268	2.644	0.507636	364	238.41
Arabian Sea	oxic	0.2715	2.471	0.595944	330	212.627
Arabian Sea	suboxic	0.1378	3.07
Arabian Sea	oxic	0.277	2.728	0.754222	383	253.42
Arabian Sea	oxic	0.2815	1.654	0.703667	514	435.435
Arabian Sea	suboxic	0.1405	3.02
Arabian Sea	oxic	0.286	1.207	0.601667	498	440.668
Arabian Sea	oxic	0.289	1.478	0.58	242	171.795
Arabian Sea	suboxic	0.1433	3.06
Arabian Sea	oxic	0.292	1.453	0.5815	348	278.983
Arabian Sea	oxic	0.295	1.529	0.658667	253	180.373
Arabian Sea	suboxic	0.1461	3.11
Arabian Sea	suboxic	0.1467	3.08
Arabian Sea	oxic	0.298	1.646	0.773667	493	414.815
Arabian Sea	oxic	0.302	1.522	0.7145	439	366.705
Arabian Sea	suboxic	0.1488	2.92
Arabian Sea	oxic	0.306	1.358	0.5845	605	540.495
Arabian Sea	oxic	0.31	1.489	0.56775	383	312.272
Arabian Sea	suboxic	0.1516	2.95
Arabian Sea	oxic	0.314	1.121	0.58875	368	314.752
Arabian Sea	oxic	0.318	1.424	0.588375	425	357.36
Arabian Sea	suboxic	0.1544	2.98
Arabian Sea	oxic	0.322	1.543	0.580875	391	317.707
Arabian Sea	oxic	0.326	1.242	0.611625	524	465.005
Arabian Sea	suboxic	0.1572	2.92
Arabian Sea	oxic	0.33	1.165	0.655125	502	446.663
Arabian Sea	oxic	0.3315	1.156	0.656345	582	527.09
Arabian Sea	suboxic	0.1599	2.95
Arabian Sea	oxic	0.3331	1.362	0.625448	449	384.305
Arabian Sea	oxic	0.3346	1.553	0.58825	301	227.233
Arabian Sea	suboxic	0.1627	2.94
Arabian Sea	oxic	0.3361	1.643	0.541643	120	41.9575
Arabian Sea	oxic	0.3376	1.837	0.554345	118	30.7425
Arabian Sea	suboxic	0.1655	2.95
Arabian Sea	oxic	0.3388	1.84	0.596138	183	95.6
Arabian Sea	oxic	0.3408	2.302	0.685029	186	76.655
Arabian Sea	suboxic	0.1682	2.94
Arabian Sea	oxic	0.3428	2.113	0.786743	222	121.633
Arabian Sea	oxic	0.3448	1.939	0.870395	334	241.897
Arabian Sea	suboxic	0.171	2.97
Arabian Sea	oxic	0.347	2.028	0.958907	319	222.67
Arabian Sea	oxic	0.3492	1.849	0.927	351	263.173
Arabian Sea	suboxic	0.1725	3.04
Arabian Sea	oxic	0.3516	1.905	0.863	341	250.512
Arabian Sea	oxic	0.3537	1.982	0.792674	360	265.855
Arabian Sea	suboxic	0.174	2.81
Arabian Sea	oxic	0.356	2.043	0.715651	227	129.957
Arabian Sea	oxic	0.3605	2.278	0.564953	237	128.795
Arabian Sea	suboxic	0.1755	3.04
Arabian Sea	oxic	0.365	2.212	0.414256	260	154.93
W Medit	oxic	0		0.379593		85.3019
W Medit	oxic	0		0.345086		123.539
W Medit	oxic	0		0.268132		106.272
W Medit	oxic	0		0.217563		119.104
W Medit	oxic	0		0.211476		105.468
W Medit	oxic	0		0.279911
W Medit	oxic	0		0.18685		106.467
W Medit	oxic	0		0.199123		162.745
W Medit	oxic	0		0.180659		171.052
W Medit	oxic	0		0.201433		245.482
W Medit	oxic	0		0.159275		216.126
W Medit	oxic	0		0.169079		238.109
W Medit	oxic	0		0.147851		201.456
W Medit	oxic	0		0.150429		220.979
W Medit	oxic	0		0.143411		212.461
W Medit	oxic	0		0.220661		184.649
W Medit	oxic	0		0.347229		187.785
W Medit	oxic	0		0.209272		198.428
W Medit	oxic	0		0.190295		231.393
W Medit	oxic	0		0.198595		224.021
W Medit	oxic	0		0.0996768		212.316
W Medit	oxic	0		0.178828		200.314
W Medit	oxic	0		0.178712		194.353
W Medit	oxic	0		0.23062		191.147
W Medit	oxic	0		0.149263		175.948
W Medit	oxic	0		0.129098		199.465
W Medit	oxic	0		0.119416		193.983
W Medit	oxic	0		0.140559		196.23
W Medit	oxic	0		0.149339		193.588
W Medit	oxic	0		0.158413		187.594
W Medit	oxic	0		0.159488		198.826
W Medit	oxic	0		0.199815		238.746
W Medit	oxic	0		0.13935		281.181
W Medit	oxic	0		0.130776		285.941
W Medit	oxic	0		0.190766		232.372
W Medit	oxic	0		0.149552		188.059
W Medit	oxic	0		0.198915		212.878
W Medit	oxic	0		0.201725		203.38
W Medit	oxic	0		0.161687		199.213
W Medit	oxic	0		0.178876		193.507
W Medit	oxic	0		0.128304		229.37
W Medit	oxic	0		0.12844		214.854
W Medit	oxic	0		0.139714		206.061
W Medit	oxic	0		0.149202		199.702
W Medit	oxic	0		0.157852		240.361
W Medit	oxic	0		0.170339		246.665
W Medit	oxic	0		0.169409		214.089
W Medit	oxic	0		0.181056		207.261
W Medit	oxic	0		0.229725
W Medit	oxic	0		0.161031		216.241
W Medit	oxic	0		0.1799		181.695
W Medit	oxic	0		0.169661		186.552
W Medit	oxic	0		0.168138
W Medit	oxic	0		0.207721		215.379
W Medit	oxic	0		0.218243
W Medit	oxic	0		0.168333		215.063
W Medit	oxic	0		0.202133
W Medit	oxic	0		0.168905
W Medit	oxic	0		0.14762		279.126
W Medit	oxic	0		0.161546		261.967
W Medit	oxic	0		0.138962		230.665
W Medit	oxic	0		0.130025		226.851
W Medit	oxic	0		0.14966		242.131
W Medit	oxic	0		0.151024		175.134
W Medit	oxic	0		0.119856		180.219
W Medit	oxic	0		0.147906		162.26
W Medit	oxic	0		0.210282		195.172
W Medit	oxic	0		0.169808		166.919
W Medit	oxic	0		0.18818
W Medit	oxic	0		0.0995761		168.663
W Medit	oxic	0		0.180067		163.104
W Medit	oxic	0		0.15117
W Medit	oxic	0		0.14166
W Medit	oxic	0		0.0692623
W Medit	oxic	0		0.0886537		147.756
W Medit	oxic	0		0.0980855		116.25
W Medit	oxic	0		0.108749		113.177
W Medit	oxic	0		0.117398		189.351
W Medit	oxic	0		0.14955
W Medit	oxic	0		0.139268
W Medit	oxic	0		0.148861
W Medit	oxic	0		0.120512		117.229
W Medit	oxic	0		0.129462		110.967
W Medit	oxic	0		0.108419		97.4552
W Medit	oxic	0		0.200878
W Medit	oxic	0		0.124844		107.009
W Medit	oxic	0		0.0989496		313.975
W Medit	oxic	0		0.163846		324.826
W Medit	oxic	0		0.159744		399.361
W Medit	oxic	0		0.122812		118.373
W Medit	oxic	0		0.22286		80.113
W Medit	oxic	0		0.0976986		73.4576
W Medit	oxic	0		0.245199		494.967
W Medit	oxic	0		0.329781		53.5142
W Medit	oxic	0		0.167816		232.738
W Medit	oxic	0		0.130032		263.08
W Medit	oxic	0		0.149069		174.543
W Medit	oxic	0		0.119071		155.72
W Medit	oxic	0		0.100542		170.247
W Medit	oxic	0		0.100365		181.495
W Medit	oxic	0		0.208353		173.879
W Medit	oxic	0		0.0991463		164.489
W Medit	oxic	0		0.0994381		237.418
W Medit	oxic	0		0.0999001
W Medit	oxic	0		0.179498
W Medit	oxic	0		0.17247		222.829
W Medit	oxic	0		0.233827		218.239
W Medit	oxic	0		0.238029		179.397
W Medit	oxic	0		0.109051		239.913
W Medit	oxic	0		0.147056		254.171
W Medit	oxic	0		0.170298		194.239
W Medit	oxic	0		0.187795		162.657
W Medit	oxic	0		0.198835		184.248
W Medit	oxic	0		0.231693		181.397
W Medit	oxic	0		0.146214		208.029
W Medit	oxic	0		0.11937		347.146
W Medit	oxic	0		0.128222		328.61
W Medit	oxic	0		0.293777		183.982
W Medit	oxic	0		0.108705		211.535
W Medit	oxic	0		0.127167		130.269
W Medit	oxic	0		0.202574		551.12
W Medit	oxic	0		0.12643		150.099
W Medit	oxic	0		0.194651		111.584
W Medit	oxic	0		0.0999001		97.9413
W Medit	oxic	0		0.160611		452.688
W Medit	oxic	0		0.252808
W Medit	oxic	0		0.224354		293.126
W Medit	oxic	0		0.175368		512.613
W Medit	oxic	0		0.154878		117.927
W Medit	oxic	0		0.135422		105.917
Cariaco Basin	anoxic	0.273537	8.65	0.4	285	8.2
Cariaco Basin	anoxic	0.279923	4.57	2.4	189	42.76
Cariaco Basin	anoxic	0.276656	7.45	2.1	252	13.6
Cariaco Basin	anoxic	0.282723	7.15	2.3	232	3.2
[truncated: 232 more rows]
